# Supplementary material for: Interaction between Butyrate and Tumor Necrosis Factor α in Primary Rat Colonocytes
Source: MDPI journal article supplement (doi:10.3390/biom13020258), 2023-01-30
Supplement: s1 [file s1]

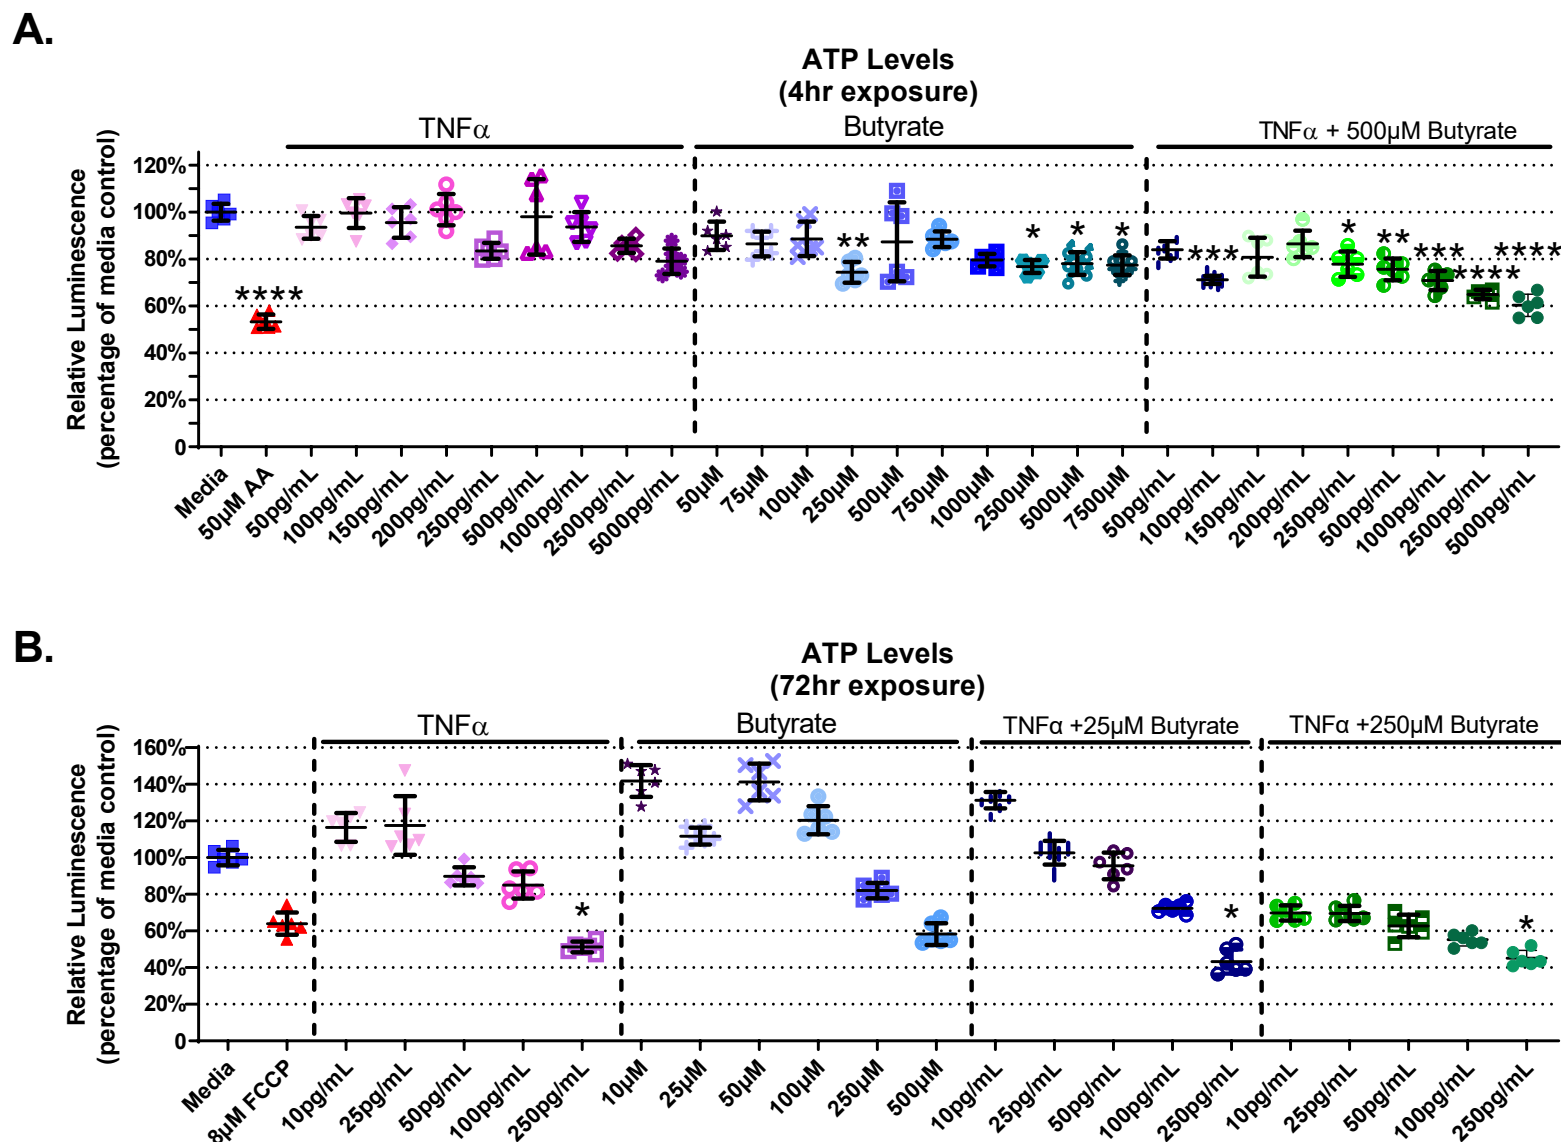

**Supplemental Figure S1** Relative ATP Levels after exposure to butyrate and TNF $\alpha$ . (A.) 4 hours (B.) 72 hours. FCCP or Antimycin (AA) were used as positive controls. Relative Luminescence is graphed for each experimental group and is **normalized to the media control** (Horizontal bar represents mean relative fluorescence  $\pm$  standard deviation). Asterisks indicate degree of significance from media control (**Kruskal-Wallis test followed by a Dunn's multiple comparison test to media control**,  $n = 3-4/\text{experiment}$ , two independent experiments were combined, \* =  $p < 0.05$ , \*\* =  $p < 0.01$ , \*\*\* =  $p < 0.001$ , \*\*\*\* =  $p < 0.0001$ ). **For simplicity, we only show differences from the control group on the figure, however, in Supplemental Data Table 3, we provide all comparisons among all groups.**

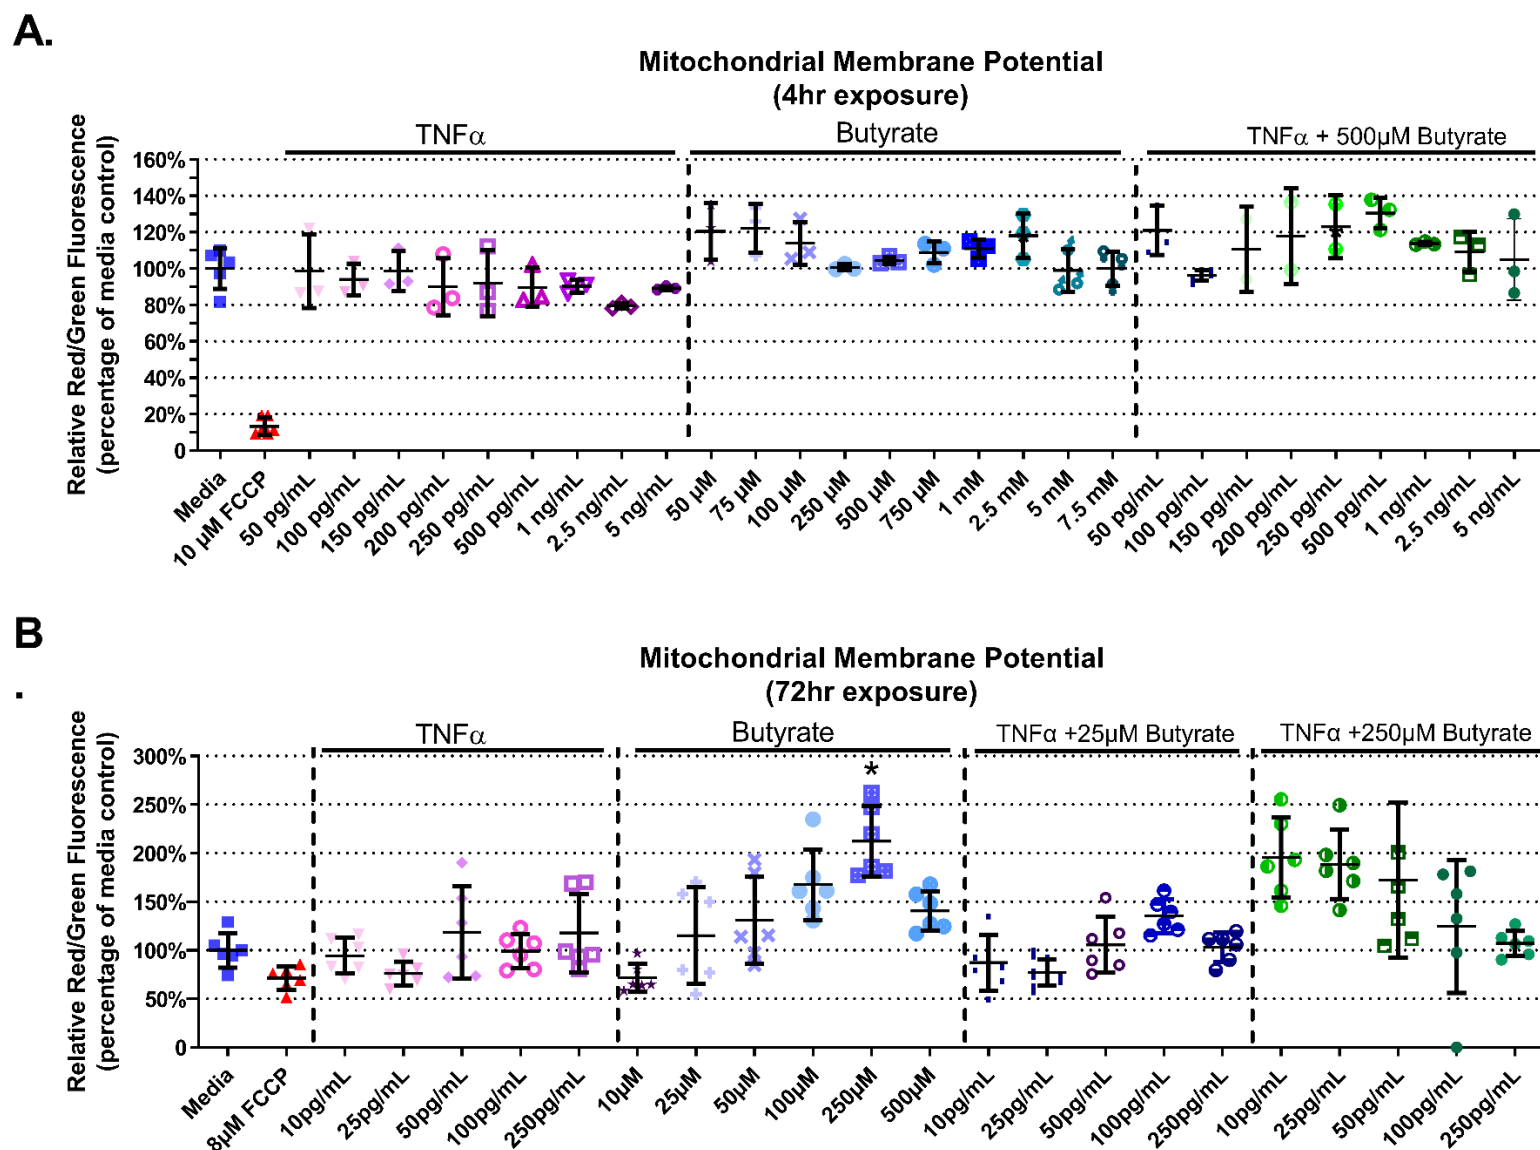

**Supplemental Figure S2** Mitochondrial membrane potential after exposure to butyrate and TNF $\alpha$  for (A.) 4 hours (B.) 72 hours. FCCP was used as positive control. Relative red/green fluorescence ratio is graphed for each experimental group and is normalized to the media control (Mean relative fluorescence  $\pm$  standard deviation). Asterisks indicate degree of significance from media control (Kruskal-Wallis test followed by a Dunn's multiple comparison,  $n=3$ /experiment, significance determined at  $*$ =  $p<0.05$ ,  $**$ = $p<0.01$ ,  $***$ = $p<0.001$ ,  $****$ =  $p<0.0001$ ). For simplicity, we only show differences from the control group on the figure, however, in Supplemental Data Table 3, we provide all comparisons among all groups.

**A.**

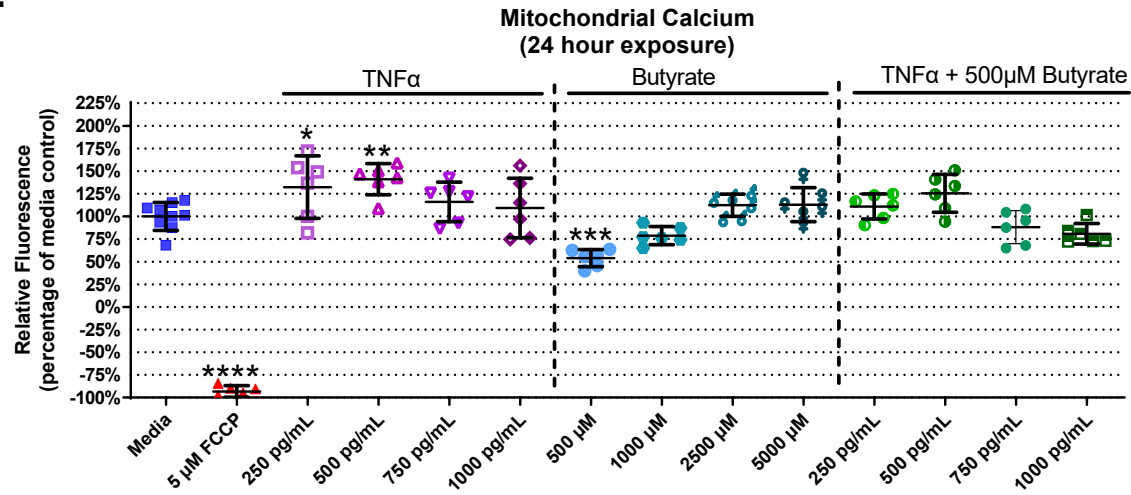

**B.**

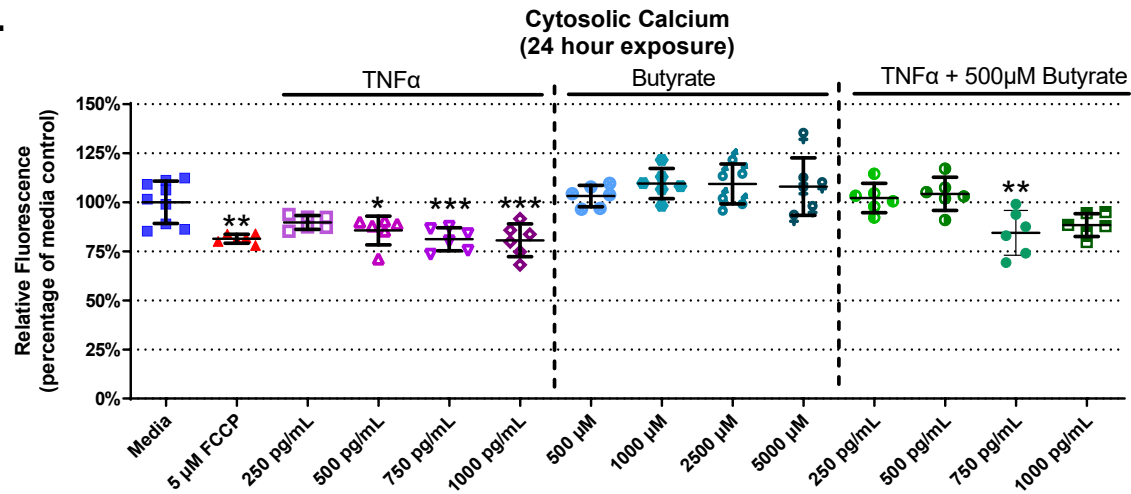

**Supplemental Figure S3** (A) Mitochondrial and (B) Cytosolic calcium of primary rat colon epithelial cells after exposure to butyrate and TNFα for 24 hours. FCCP was used as positive control as it inhibits the uptake of the mitochondrial dye Rhod-2 AM. Asterisks indicate degree of significance from media control (**One-Way ANOVA followed by a Dunnett's multiple comparison**, mean ± S.D., n=3, significance determined at \*= p<0.05, \*\*=p<0.01, \*\*\*=p<0.001, \*\*\*\*= p<0.0001). **For simplicity, we only show differences from the control group on the figure, however, in Supplemental Data Table 3, we provide all comparisons among all groups.**

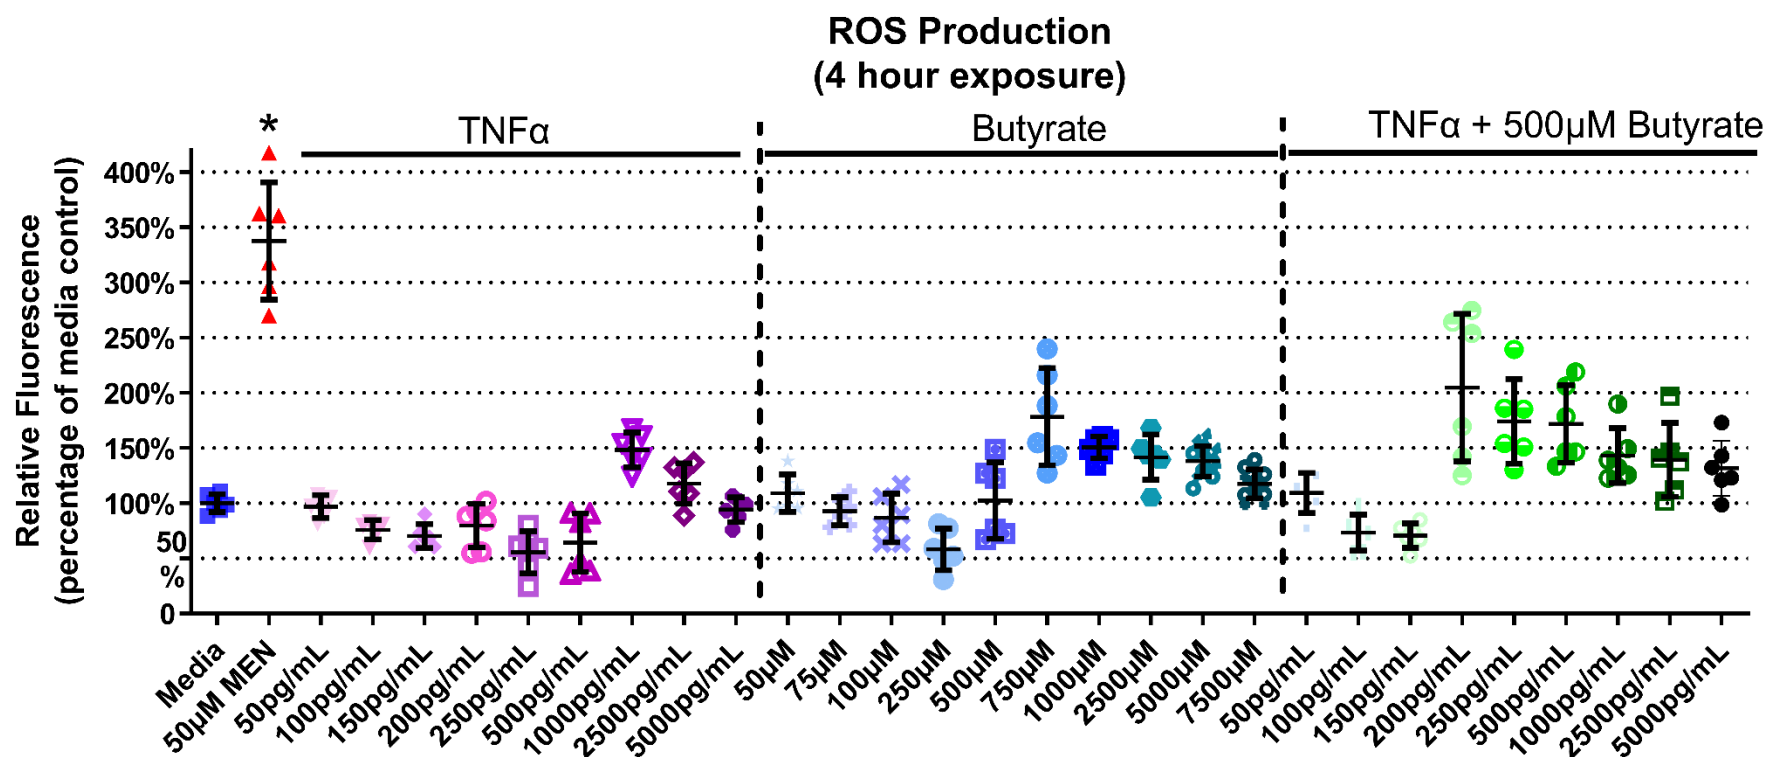

**Supplemental Figure S4** Reactive oxygen species (ROS) production of primary rat colon epithelial cells after exposure to butyrate and TNFα for 4 hours. Menadione (MEN) was used as a positive control as a potent inducer of ROS. (Mean fluorescence  $\pm$  standard deviation) (n=3). Asterisks indicate degree of significance from media control (Kruskal-Wallis test followed by a Dunn's multiple comparison, n=3, significance determined at \*= p<0.05, \*\*=p<0.01, \*\*\*=p<0.001, \*\*\*\*= p<0.0001). For simplicity, we only show differences from the control group on the figure, however, in Supplemental Data Table 3, we provide all comparisons among all groups.

**Supplemental Table S1.** Primers used for real-time PCR analysis.

| Gene name                                                   | Gene Symbol      | Forward (5' to 3')       | Reverse (5' to 3')      | Product length | Reference                   |
|-------------------------------------------------------------|------------------|--------------------------|-------------------------|----------------|-----------------------------|
| Ribosomal 18s                                               | Rps18            | GTAAACCCGTTGAACCCCAT     | CCATCCAATCGGTAGTAGCG    | 136            | Han et al., 2020            |
| Beta-actin                                                  | Bactin           | GGACCTGACAGACTACCTCA     | GTTGCCAATAGTGATGACCT    | 208            | Han et al., 2020            |
| Caspase 3                                                   | Casp3            | AATTCAAGGGACGGGTCATG     | TGACACAATACACGGGATCTG   | 180            | Li et al., 2020             |
| Catalase                                                    | Cat              | ATGTGGTTTTACCGACGAG      | CCTTTGCCTTGGAGTATCTGG   | 135            |                             |
| Leucine rich repeat containing G protein coupled receptor 5 | Lgr5             | AACATCAGTCAGCTACCCGC     | GCATTTCCAGCAAGACGCAA    | 74             |                             |
| Citrate synthase                                            | Cs               | CGGTTCTTGATCCTGATGAGGG   | ACTGTTGAGGGCTGTGATGGC   | 284            | Serdan et al., 2021         |
| Pyruvate dehydrogenase kinase 1                             | Pdk1             | GGATTGCCCATATCACGTCTTT   | TCCCGTAACCTCTAGGGAATA   | 2005           | Xiang et al., 2014          |
| Pyruvate dehydrogenase kinase 2                             | Pdk2             | ATGAAAGAGATCAACCTGCTTCC  | GGCTCTGGACATACCAGCTC    | 82             | Yao et al., 2021            |
| Pyruvate dehydrogenase kinase 4                             | Pdk4             | GACCCAGTCACCAATCAAATCT   | GGTTCATCAGCATCCGAGTAGA  | 82             | Yao et al., 2021            |
| PPARG coactivator 1 alpha                                   | Ppargc1a         | CCCACAGAGAACAGAAACAG     | GGGTCAGAGGAAGAGATAAAG   | 118            | Hernández et al., 2012      |
| Sepiapterin reductase                                       | Spr              | GTTCCGGTGTTGCTTCTAAGC    | ATAGCTCAGCACCTCACAC     | 488            |                             |
| Solute carrier family 16 member 1                           | Slc16a1          | GGTGTCATTGGAGGTCTTGGG    | GGCCAATGGTCGCTTCTTG     | 90             | Enoki et al., 2006          |
| Solute carrier family 16 member 3                           | Slc16a3          | GGGTCATCACTGGCTTGGGT     | GGAACACGGGACTGCCTGC     | 123            | Enoki et al., 2006          |
| BCL2 associated X                                           | Bax              | AGGATGATTGCTGATGTGGATAC  | CACAAAGATGGTCACTGTCTGC  | 300            | Van Der Hoeven et al., 2003 |
| B-cell lymphoma 2                                           | Bcl2             | GCTACGAGTGGGATACTGGAGA   | AGTCATCCACAGAGCGATGTT   | 446            | Schoemaker et al., 2002     |
| Superoxide dismutase 1                                      | Sod1 (Cu/Zn SOD) | GCGTCATTCACTTCGAGCAG     | ATTGATGGACATGGAACCCA    | 102            |                             |
| Superoxide dismutase 2                                      | Sod2 (Mn SOD)    | AAGGTCGCTTACAGATTGCC     | GCTAACATTCTCCAGTTGATTAC | 176            |                             |
| TNF receptor superfamily member 1B                          | Tnfrsf1b         | TCAGATGTGCTGTGCTAAGTGTCC | GCCAGGATGCTACAAATGCG    | 291            |                             |

1. Han, H., Liu, L., Chen, M., Liu, Y., Wang, H., & Chen, L. (2020). The optimal compound reference genes for qRT-PCR analysis in the developing rat long bones under physiological conditions and prenatal dexamethasone exposure model. *Reproductive Toxicology*, 98, 242-251.
2. Li, Xin, et al. "Effect of nicotine on placental inflammation and apoptosis in preeclampsia-like model." *Life Sciences* 261 (2020): 118314.
3. Serdan, T. D. A., Masi, L. N., Pereira, J. N. B., Rodrigues, L. E., Alecrim, A. L., Scervino, M. V. M., ... & Hirabara, S. M. (2021). Impaired brown adipose tissue is differentially modulated in insulin-resistant obese wistar and type 2 diabetic Goto-Kakizaki rats. *Biomedicine & Pharmacotherapy*, 142, 112019.
4. Xiang, L., Gilkes, D. M., Chaturvedi, P., Luo, W., Hu, H., Takano, N., ... & Semenza, G. L. (2014). Ganetespib blocks HIF-1 activity and inhibits tumor growth, vascularization, stem cell maintenance, invasion, and metastasis in orthotopic mouse models of triple-negative breast cancer. *Journal of molecular medicine*, 92(2), 151-164.
5. Yao, S., Shang, W., Huang, L., Xu, R., Wu, M., & Wang, F. (2021). The oncogenic and prognostic role of PDK1 in the progression and metastasis of ovarian cancer. *Journal of Cancer*, 12(3), 630.

6. Hernández, A., Curi, R., Salazar, L. A., HERNANDEZ, A., CURI, R., & SALAZAR, L. (2012). Repression of Ppargc1a Gene in Liver of Hyperglycemic Rats Induced with High Fat Diet Combined with Streptozotocin. *Int. J. Morphol*, 30(2), 643-650.
7. Enoki, T., Yoshida, Y., Lally, J., Hatta, H., & Bonen, A. (2006). Testosterone increases lactate transport, monocarboxylate transporter (MCT) 1 and MCT4 in rat skeletal muscle. *The Journal of physiology*, 577(1), 433-443.
8. Van Der Hoeven, J. A., Moshage, H., Schuurs, T., Nijboer, M., Van Schilfgaarde, R., & Ploeg, R. J. (2003). Brain death induces apoptosis in donor liver of the rat. *Transplantation*, 76(8), 1150-1154.
9. Schoemaker, M. H., Ros, J. E., Homan, M., Trautwein, C., Liston, P., Poelstra, K., ... & Moshage, H. (2002). Cytokine regulation of pro-and anti-apoptotic genes in rat hepatocytes: NF- $\kappa$ B-regulated inhibitor of apoptosis protein 2 (cIAP2) prevents apoptosis. *Journal of hepatology*, 36(6), 742-750.

Supplemental Data Table S2. Contains metabolomics data.

Concentration (µg/g cells)

| Polarity | Name                                        | Formula      | Annot. Delta | Calc. MW  | RT [min] |
|----------|---------------------------------------------|--------------|--------------|-----------|----------|
| Negative | (+/-)13-HODE                                | C18 H32 O3   | 0.48         | 296.23529 | 16.216   |
| Positive | (1R,9S)-11-[(Methylsulfanyl)C18 H20 N2 C    |              | -2.57        | 360.09569 | 5.322    |
| Positive | (4-Fluorophenyl)[(3S)-3-(1-n C19 H18 F N3   |              | 4.82         | 323.14495 | 9.989    |
| Positive | [(3S)-3-(1H-Benzimidazol-2- C18 H16 F N3    |              | 4.92         | 309.12926 | 8.611    |
| Positive | [1-(4-fluorophenyl)-5-methy C21 H20 F N3    |              | 4.28         | 349.16053 | 11.166   |
| Positive | 1-(4-chlorophenyl)-1-pheny C19 H16 Cl N     |              | 2.31         | 309.09276 | 7.998    |
| Positive | 1-(4-Fluorophenyl)-3-(2-me C18 H14 F N3     |              | 4.9          | 323.10859 | 8.04     |
| Positive | 1-allyl-4,5-diphenyl-2-(2-thi C22 H18 N2 S  |              | -2.03        | 342.11837 | 10.445   |
| Positive | 1,5-diphenyl-1H-1,2,4-triaz C14 H11 N3 S    |              | -1.96        | 253.06687 | 3.227    |
| Positive | 2-(2-amino-3-methylbutana C14 H20 N2 C      |              | -2.06        | 264.14685 | 9.284    |
| Negative | 2-(Acetylamino)hexanoic ac C8 H15 N O3      |              | 0.63         | 173.1053  | 10.34    |
| Positive | 2-[(3S)-1-(2-Pyridinylmethyl C17 H17 N3 S   |              | -1.62        | 295.11384 | 8.238    |
| Positive | 2-[(3S)-1-(3,4-Difluorobenzy C19 H18 F2 N   |              | 1.19         | 328.13911 | 12.861   |
| Positive | 2-Amino-N,N-diethylacetam C6 H14 N2 O       |              | -1.47        | 130.11042 | 2.615    |
| Negative | 2-Furoic acid                               | C5 H4 O3     | 0.26         | 112.01607 | 7.676    |
| Negative | 2-Naphthalenesulfonic acid                  | C10 H8 O3 S  | 0.19         | 208.01945 | 10.376   |
| Positive | 2,3,4,9-Tetrahydro-1H-β-car C12 H12 N2 C    |              | -1.54        | 216.08954 | 9.279    |
| Positive | 2,4-Dimethylbenzaldehyde                    | C9 H10 O     | -0.66        | 134.07308 | 11.3     |
| Positive | 2,5-Dimethylpyrazine                        | C6 H8 N2     | -1.07        | 108.06863 | 2.858    |
| Positive | 3-(2-fluorophenyl)-2-[(2-fluc C15 H10 F2 N  |              | 1.45         | 304.04863 | 2.488    |
| Positive | 3-(allylsulfanyl)-4-[4-(benzyl C19 H19 N3 C |              | -1.28        | 337.12445 | 8.388    |
| Positive | 3-(benzylthio)-5-[4-(tert-but C20 H23 N3 S  |              | -2.33        | 337.16048 | 9.822    |
| Positive | 3-[4-(tert-butyl)anilino]-2-(3 C18 H18 N2 C |              | -2.6         | 310.11318 | 10.099   |
| Positive | 3-amino-2-phenyl-2H-pyraz C12 H10 N4 C      |              | -1.92        | 242.07991 | 11.373   |
| Positive | 3-Hydroxy-2-methylpyridine C6 H7 N O        |              | -1           | 109.05265 | 2.597    |
| Negative | 3-Hydroxy-3-(methoxycarbc C7 H10 O7         |              | -0.4         | 206.04257 | 7.687    |
| Positive | 3-Phenyl-2,3-dihydro-1,3-be C13 H10 N2 S    |              | -1.52        | 226.05613 | 3.707    |
| Positive | 3,5-Dimethoxyaniline                        | C8 H11 N O2  | 0.32         | 153.07903 | 8.302    |
| Positive | 4-(2-methoxyphenyl)-1-(3-p C20 H21 N3 C     |              | -3.34        | 351.13936 | 8.709    |
| Positive | 4-(4-methoxyphenyl)-2-(2-tl C15 H12 N2 C    |              | -2.01        | 268.0665  | 7.653    |
| Positive | 4-[2-(2-Thienyl)-4-quinolyl]r C17 H16 N2 C  |              | -1.74        | 296.09782 | 9.223    |
| Positive | 4-[[[(3S)-3-(5-Fluoro-1H-ben C19 H18 F N3   |              | 3.34         | 339.13944 | 8.501    |
| Positive | 4-Hydroxybenzaldehyde                       | C7 H6 O2     | -1.62        | 122.03658 | 4.58     |
| Positive | 4-Methoxychalcone                           | C16 H14 O2   | -4.54        | 238.0983  | 9.258    |
| Positive | 4-methyl-6-[(4-methylphen C17 H15 N3 S      |              | -2.3         | 293.098   | 7.927    |
| Negative | 4-Methylphenol                              | C7 H8 O      | 0.3          | 108.05755 | 8.721    |
| Positive | 4-Morpholinepropanesulfor C7 H15 N O4       |              | -1.9         | 209.07178 | 1.949    |
| Positive | 4-morpholinobenzoic acid                    | C11 H13 N O3 | -1.62        | 207.08921 | 11.456   |

|          |                                |              |       |           |        |
|----------|--------------------------------|--------------|-------|-----------|--------|
| Negative | 4-Nitrophenol                  | C6 H5 N O3   | 0.67  | 139.02704 | 12.253 |
| Negative | 4-Oxoproline                   | C5 H7 N O3   | 0.04  | 129.0426  | 3.219  |
| Positive | 4,4'-Bis(diethylamino)benzo    | C21 H28 N2 C | -3.25 | 324.21911 | 14.93  |
| Positive | 5-(2-Chloro-6-fluorobenzyl)-   | C13 H12 Cl F | 4.84  | 298.03573 | 1.614  |
| Positive | 5-Fluoro THJ                   | C22 H21 F N4 | 0.22  | 376.17002 | 10.013 |
| Positive | 5-Hydroxylysine                | C6 H14 N2 O3 | -1.44 | 162.10021 | 1.581  |
| Positive | 5(Z),8(Z),11(Z)-Eicosatrienoic | C22 H39 N O3 | -2.5  | 349.29721 | 17.147 |
| Positive | 6-Methyl-2-pyridinemethan      | C7 H9 N O    | -1.13 | 123.06828 | 9.349  |
| Positive | 7-Methylguanine                | C6 H7 N5 O   | -1.16 | 165.06487 | 3.282  |
| Negative | 8-iso Prostaglandin F1?        | C20 H36 O5   | 0.94  | 356.25661 | 13.465 |
| Positive | 8,8-dimethyl-2-phenyl-4H,8     | C20 H16 O3   | -4.35 | 304.10862 | 7.605  |
| Negative | 9-Phenanthrol                  | C14 H10 O    | -3.05 | 194.07257 | 1.56   |
| Positive | Acetyl-L-carnitine             | C9 H17 N O4  | -1.34 | 203.11549 | 2.746  |
| Positive | Acetylcholine                  | C7 H15 N O2  | -1.31 | 145.11009 | 2.021  |
| Positive | Adenine                        | C5 H5 N5     | -0.55 | 135.05442 | 2.736  |
| Positive | Adenosine 5'-monophosphate     | C10 H14 N5 C | -2.43 | 347.06224 | 2.738  |
| Negative | Adipic acid                    | C6 H10 O4    | 0.71  | 146.05801 | 8.53   |
| Positive | Aniline                        | C6 H7 N      | -1.49 | 93.05771  | 4.125  |
| Positive | Benperidol                     | C22 H24 F N3 | 3.62  | 381.18663 | 11.676 |
| Negative | Benzoic acid                   | C7 H6 O2     | 0.31  | 122.03682 | 10.297 |
| Positive | Betaine                        | C5 H11 N O2  | -1.66 | 117.07878 | 1.734  |
| Positive | Biopterin                      | C9 H11 N5 O3 | -2.08 | 237.0857  | 5.571  |
| Positive | Bis(4-ethylbenzylidene)sorb    | C24 H30 O6   | -2.46 | 414.20322 | 14.186 |
| Positive | Chlormequat                    | C5 H12 Cl N  | -1.46 | 121.06565 | 2.131  |
| Positive | Choline                        | C5 H13 N O   | -1.91 | 103.09952 | 1.887  |
| Negative | Citric acid                    | C6 H8 O7     | 0.51  | 192.0271  | 2.867  |
| Positive | Creatine                       | C4 H9 N3 O2  | -1.56 | 131.06927 | 1.975  |
| Positive | Creatinine                     | C4 H7 N3 O   | -1.13 | 113.05878 | 1.89   |
| Positive | Cyproheptadine                 | C21 H21 N    | -2.81 | 287.16659 | 14.857 |
| Negative | Cystathionine                  | C7 H14 N2 O4 | 0.16  | 222.06746 | 1.707  |
| Positive | Cysteinylglycine               | C5 H10 N2 O3 | -1.53 | 178.04094 | 2.787  |
| Negative | Cytarabine                     | C9 H13 N3 O5 | 0.61  | 243.08567 | 2.68   |
| Positive | Cytidine                       | C9 H13 N3 O5 | -2.05 | 243.08502 | 2.736  |
| Positive | Cytidine 5'-monophosphate      | C9 H14 N3 O8 | -2.46 | 323.05106 | 2.342  |
| Positive | Cytosine                       | C4 H5 N3 O   | -1.35 | 111.04311 | 2.736  |
| Negative | D-(+)-Malic acid               | C4 H6 O5     | 0.67  | 134.02161 | 2.903  |
| Positive | D-(+)-Proline                  | C5 H9 N O2   | -1.51 | 115.06315 | 2.007  |
| Positive | D-Panthenol                    | C9 H19 N O4  | -1.6  | 205.13108 | 8.092  |
| Positive | D-Serine                       | C3 H7 N O3   | -0.86 | 105.0425  | 2.551  |
| Positive | delta8-THC-d9                  | C21 H21 [2]H | 1.73  | 323.28163 | 16.988 |
| Positive | Desmethylozapine               | C17 H17 Cl N | -1.59 | 312.11368 | 8.526  |
| Positive | Di(2-ethylhexyl) phthalate     | C24 H38 O4   | -2.31 | 390.27611 | 18.108 |
| Positive | Didemethylisoproturon          | C10 H14 N2 C | -1.24 | 178.11039 | 7.562  |

|          |                                                        |              |       |           |        |
|----------|--------------------------------------------------------|--------------|-------|-----------|--------|
| Positive | Diphenylamine                                          | C12 H11 N    | -1.69 | 169.08886 | 14.344 |
| Positive | Disperse blue 7                                        | C18 H18 N2 O | 0.06  | 358.11651 | 11.401 |
| Negative | DL-Alanine                                             | C3 H7 N O2   | -0.48 | 89.04764  | 3.131  |
| Positive | DL-Arginine                                            | C6 H14 N4 O2 | -0.67 | 174.11156 | 2.843  |
| Negative | DL-Lactic Acid                                         | C3 H6 O3     | -0.71 | 90.03163  | 2.85   |
| Negative | DL-Malic acid                                          | C4 H6 O5     | 0.31  | 134.02156 | 2.294  |
| Positive | DL-Serine                                              | C3 H7 N O3   | -0.85 | 105.0425  | 8.719  |
| Positive | DL-Tryptophan                                          | C11 H12 N2 O | -1.79 | 204.08951 | 8.619  |
| Negative | DL-β-Leucine                                           | C6 H13 N O2  | -0.02 | 131.09463 | 5.151  |
| Negative | Docosatrienoic acid                                    | C22 H38 O2   | 0.91  | 334.28748 | 17.33  |
| Negative | Dodecyl sulfate                                        | C12 H26 O4 S | 0.84  | 266.1554  | 17.812 |
| Positive | Ethyl 2-(4-toluidino)-4-(trifluoromethyl)phenylacetate | C15 H14 F3 N | -2.46 | 325.10301 | 11.532 |
| Negative | Ethyl myristate                                        | C16 H32 O2   | 0.76  | 256.24042 | 16.67  |
| Positive | Ethyl violet                                           | C31 H41 N3   | -2.55 | 455.32889 | 13.94  |
| Negative | Ethylmalonic acid                                      | C5 H8 O4     | 0.16  | 132.04228 | 2.698  |
| Positive | Fingolimod                                             | C19 H33 N O2 | -2.54 | 307.25035 | 17.828 |
| Positive | Flurandrenolide                                        | C24 H33 F O6 | 3.13  | 436.22748 | 9.614  |
| Negative | Formononetin                                           | C16 H12 O4   | -1.96 | 268.07303 | 2.645  |
| Negative | Fumaric acid                                           | C4 H4 O4     | 0.19  | 116.01098 | 2.29   |
| Negative | Gluconic acid                                          | C6 H12 O7    | -0.08 | 196.05829 | 1.617  |
| Negative | Glutaric acid                                          | C5 H8 O4     | 0.34  | 132.0423  | 7.575  |
| Negative | Glycine                                                | C2 H5 N O2   | 0.02  | 75.03203  | 2.125  |
| Negative | Glycolic acid                                          | C2 H4 O3     | -0.62 | 76.016    | 2.754  |
| Positive | Glycyl-L-leucine                                       | C8 H16 N2 O2 | -1.21 | 188.11587 | 8.185  |
| Positive | Guanine                                                | C5 H5 N5 O   | -1.24 | 151.04922 | 2.736  |
| Positive | Hexanoylcarnitine                                      | C13 H25 N O4 | -2.18 | 259.17779 | 10.536 |
| Positive | Hypoxanthine                                           | C5 H4 N4 O   | -1.21 | 136.03835 | 2.994  |
| Negative | Indole-3-acetic acid                                   | C10 H9 N O2  | 0.23  | 175.06337 | 12.26  |
| Negative | Isobutyric acid                                        | C4 H8 O2     | -0.49 | 88.05239  | 8.29   |
| Positive | Isoleucine                                             | C6 H13 N O2  | -1.3  | 131.09446 | 5.145  |
| Negative | Isophthalic acid                                       | C8 H6 O4     | 0.22  | 166.02664 | 9.621  |
| Positive | L-(-)-Methionine                                       | C5 H11 N O2  | -1.28 | 149.05086 | 2.778  |
| Negative | L-(+)-Lactic acid                                      | C3 H6 O3     | -0.39 | 90.03166  | 2.741  |
| Positive | L-Alanyl-L-proline                                     | C8 H14 N2 O2 | -1.34 | 186.10019 | 3.009  |
| Positive | L-Dopa                                                 | C9 H11 N O4  | -1.25 | 197.06856 | 8.374  |
| Positive | L-Glutamic acid                                        | C5 H9 N O4   | -1.32 | 147.05296 | 1.743  |
| Positive | L-Glutathione (reduced)                                | C10 H17 N3 O | -2.56 | 307.08302 | 7.216  |
| Positive | L-Histidine                                            | C6 H9 N3 O2  | -1.29 | 155.06928 | 1.607  |
| Positive | L-Isoleucine                                           | C6 H13 N O2  | -1.3  | 131.09446 | 4.656  |
| Positive | L-Methionine sulfoxide                                 | C5 H11 N O3  | -1.39 | 165.04574 | 1.76   |
| Positive | L-Phenylalanine                                        | C9 H11 N O2  | -1.31 | 165.07876 | 7.843  |
| Positive | L-Pyroglutamic acid                                    | C5 H7 N O3   | -1    | 129.04246 | 3.251  |
| Positive | L-Threonine                                            | C4 H9 N O3   | -1.41 | 119.05807 | 1.648  |

|          |                                 |              |       |           |        |
|----------|---------------------------------|--------------|-------|-----------|--------|
| Negative | L-Tyrosine                      | C9 H11 N O3  | 0.23  | 181.07393 | 4.587  |
| Positive | L-Tyrosine methyl ester         | C10 H13 N O3 | -1.14 | 195.08932 | 9.606  |
| Positive | L(-)-Carnitine                  | C7 H15 N O3  | -1.57 | 161.10494 | 1.772  |
| Negative | Methylmalonic acid              | C4 H6 O4     | 0.09  | 118.02662 | 4.067  |
| Negative | Methylsuccinic acid             | C5 H8 O4     | 0.43  | 132.04231 | 8.022  |
| Positive | N-[5-(tert-butyl)-3-isoxazolyl] | C15 H16 F3 N | -2.18 | 343.11363 | 10.368 |
| Positive | N-[[[(1S,4S,6S)-4-[[5-(2-Fluor  | C26 H29 F N4 | 2.95  | 448.22878 | 11.117 |
| Negative | N-Ethylglycine                  | C4 H9 N O2   | 0.01  | 103.06333 | 1.691  |
| Positive | N,N-Bis(2-pyridinylmethyl)-1    | C21 H17 N3 C | -2.23 | 359.10843 | 9.39   |
| Positive | N,N-Diethyldodecanamide         | C16 H33 N O  | -2.26 | 255.25564 | 16.071 |
| Positive | N,N-Diethylethanolamine         | C6 H15 N O   | -1.67 | 117.11517 | 2.561  |
| Positive | N,N-Dimethylsphingosine         | C20 H41 N O3 | -2.51 | 327.31291 | 13.914 |
| Positive | N,N'-Dicyclohexylurea           | C13 H24 N2 C | -2.04 | 224.1884  | 13.949 |
| Positive | N'-{6-[(5-chloro-3-pyridyl)ox   | C13 H13 Cl N | -0.85 | 276.07756 | 8.113  |
| Positive | N2-(2,4-dimethylphenyl)-1,3     | C15 H14 N2 S | -2.11 | 254.08723 | 8.086  |
| Positive | N2-(3-Pyridyl)-4-(4-methoxy     | C15 H13 N3 C | -2    | 283.07737 | 3.227  |
| Positive | N2,1-Diphenyl-6-imino-1,6-di    | C15 H14 N6   | 4.77  | 278.12932 | 7.171  |
| Positive | N6,N6,N6-Trimethyl-L-lysine     | C9 H20 N2 O3 | -1.56 | 188.15218 | 1.596  |
| Positive | N8-Acetylspermidine             | C9 H21 N3 O  | -1.52 | 187.16818 | 1.764  |
| Positive | Nicotinamide                    | C6 H6 N2 O   | -1.63 | 122.04781 | 2.876  |
| Positive | Nicotinamide 1-oxide            | C6 H6 N2 O2  | -1.01 | 138.04279 | 2.742  |
| Positive | Nicotinamide adenine dinuc      | C21 H27 N7 C | -1.97 | 663.10782 | 2.739  |
| Positive | Niflumic acid                   | C13 H9 F3 N2 | 0.66  | 282.0618  | 1.617  |
| Positive | NP-001346                       | C11 H15 N5 C | -1.92 | 297.08899 | 1.839  |
| Negative | NP-008147                       | C19 H18 O5   | -1.21 | 326.11503 | 7.471  |
| Positive | NP-011220                       | C11 H18 N2 C | -1.71 | 210.13647 | 10.576 |
| Negative | NP-016455                       | C11 H18 N2 C | 0.26  | 242.12672 | 9.848  |
| Negative | Orotidine                       | C10 H12 N2 C | 0.89  | 288.05962 | 1.899  |
| Positive | Palmitoyl sphingomyelin         | C39 H79 N2 C | -2.62 | 702.56573 | 13.916 |
| Negative | Perfluoro-1-butanesulfonic      | C4 H F9 O3 S | 0.88  | 299.95053 | 13.446 |
| Positive | Periciazine                     | C21 H23 N3 C | -1.52 | 365.15563 | 9.595  |
| Positive | Perillartine                    | C10 H15 N O  | -1.13 | 165.11518 | 11.598 |
| Positive | Prolylleucine                   | C11 H20 N2 C | -1.7  | 228.147   | 9.292  |
| Positive | Propionylcarnitine              | C10 H19 N O4 | -1.69 | 217.13104 | 7.439  |
| Positive | Pyridoxamine                    | C8 H12 N2 O3 | -1.38 | 168.08965 | 7.609  |
| Positive | Pyrimethamine                   | C12 H13 Cl N | -1.27 | 248.08256 | 2.693  |
| Negative | Pyruvic acid                    | C3 H4 O3     | -0.17 | 88.01603  | 2.697  |
| Positive | Rhodamine 6G                    | C28 H30 N2 C | -2.17 | 442.22468 | 13.67  |
| Positive | Ricinine                        | C8 H8 N2 O2  | -1.02 | 164.05841 | 8.837  |
| Positive | S-Adenosylhomocysteine          | C14 H20 N6 C | -1.96 | 384.12084 | 7.143  |
| Positive | S-Adenosylmethionine            | C15 H22 N6 C | -2.57 | 398.13621 | 1.839  |
| Positive | Spermidine                      | C7 H19 N3    | -1.38 | 145.1577  | 1.446  |
| Positive | Spermine                        | C10 H26 N4   | -1.71 | 202.2154  | 1.417  |

|          |                              |                          |       |           |        |
|----------|------------------------------|--------------------------|-------|-----------|--------|
| Positive | Sphingosine (d18:1)          | C18 H37 N O <sub>2</sub> | -2.26 | 299.28175 | 13.777 |
| Positive | Spiperone                    | C23 H26 F N3             | 3.48  | 395.20228 | 11.966 |
| Positive | Stearamide                   | C18 H37 N O              | -2.18 | 283.2869  | 17.286 |
| Positive | tert-Butyl N-[1-(aminocarbo  | C11 H22 N2 C             | -1.68 | 230.16266 | 8.328  |
| Positive | Thiamine                     | C12 H16 N4 C             | -2.55 | 264.10381 | 1.984  |
| Positive | Thiosildenafil               | C22 H30 N6 C             | -0.73 | 490.18172 | 12.553 |
| Positive | Thymine                      | C5 H6 N2 O2              | -1.06 | 126.04279 | 7.791  |
| Positive | Tolycaine                    | C15 H22 N2 C             | -2.15 | 278.16245 | 9.9    |
| Positive | Tyrosylalanine               | C12 H16 N2 C             | -1.99 | 252.1105  | 7.927  |
| Negative | UDP-N-acetylglucosamine      | C17 H27 N3 C             | 1.09  | 607.08223 | 1.971  |
| Positive | Uracil                       | C4 H4 N2 O2              | -1.56 | 112.0271  | 4.5    |
| Positive | Valine                       | C5 H11 N O2              | -1.66 | 117.07878 | 2.708  |
| Negative | Xanthine                     | C5 H4 N4 O2              | 0.19  | 152.03345 | 3.78   |
| Positive | α-Aspartylphenylalanine      | C13 H16 N2 C             | -2.13 | 280.10533 | 8.706  |
| Negative | β-Alanine                    | C3 H7 N O2               | -0.29 | 89.04765  | 8.068  |
| Positive | β-Nicotinamide mononucleo    | C11 H15 N2 C             | -2.76 | 334.05568 | 2.393  |
| Positive | γ-Glutamylcysteine           | C8 H14 N2 O <sub>2</sub> | -2.34 | 250.06176 | 2.769  |
| Positive | γ-L-Glutamyl-L-glutamic acid | C10 H16 N2 C             | -2.19 | 276.09515 | 2.694  |

Supplemental Data Table S3. Contains all statistical analysis output for figures and

Supplemental figures.

| JJAH_VAR      | Media        | Media        | Media        | Media        | Media        | Media        |
|---------------|--------------|--------------|--------------|--------------|--------------|--------------|
| Tube Label    | M1           | M2           | M3           | M4           | M5           | M6           |
| Tube identity | Media only c |
| Collection Da | 44032        | 44032        | 44032        | 44032        | 44032        | 44032        |
| mzCloud Best  | Sp01         | Sp02         | Sp03         | Sp04         | Sp05         | Sp06         |
| 97.9          | 1.01846981   | 0.45209742   | 0.14275915   | 0.80757921   | 0.00964375   | 0.24379139   |
| 98.6          | 0.05988578   | 0.03686436   | 0.08345453   | 0.10055124   | 0.03438496   | 0.039792     |
| 99.7          | 0.11364555   | 0.05995915   | 0.10006208   | 0.12577368   | 0.05791658   | 0.0859783    |
| 99.4          | 0.17178302   | 0.13062564   | 0.12685862   | 0.09291917   | 0.19677073   | 0.12887366   |
| 98.3          | 0.1741959    | 0.08840949   | 0.14761929   | 0.15928773   | 0.10901186   | 0.142027     |
| 97.7          | 0.03481366   | 0.01934124   | 0.01934407   | 0.0784366    | 0.02615891   | 0.03451778   |
| 99.1          | 0.02582674   | 0.01513479   | 0.00587637   | 0.0337712    | 0.01883519   | 0.02282731   |
| 98.7          | 0.0170368    | 0.01052273   | 0.01627753   | 0.01354222   | 0.01082755   | 0.01991755   |
| 99.9          | 0.21579324   | 0.14048743   | 0.20508694   | 0.18385305   | 0.15192635   | 0.20465713   |
| 98.3          | 0.13636283   | 0.05940967   | 0.16499874   | 0.12866212   | 0.05180276   | 0.09656241   |
| 98.7          | 0.52293545   | 0.21233548   | 0.57394021   | 0.66131305   | 0.3006594    | 0.3185146    |
| 97.3          | 0.01535033   | 0.01822159   | 0.02159637   | 0.01700496   | 0.01900652   | 0.01444715   |
| 99.9          | 0.12225561   | 0.06869977   | 0.12633423   | 0.13342959   | 0.0561632    | 0.12234187   |
| 98.9          | 1.00938009   | 2.73098605   | 1.31844158   | 3.85875139   | 2.05730573   | 1.74305322   |
| 97.9          | 0.20113652   | 0.16419131   | 0.38325327   | 0.35131634   | 0.22849099   | 0.28181986   |
| 98.3          | 0.08011538   | 0.15206971   | 0.08912552   | 0.24168075   | 0.12997669   | 0.43182337   |
| 99.3          | 0.02447149   | 0.01651051   | 0.03651436   | 0.03916498   | 0.0186947    | 0.02498342   |
| 97.8          | 0.0501113    | 0.03281551   | 0.0477951    | 0.09731351   | 0.0592238    | 0.04082471   |
| 98            | 0.01531095   | 0.02170112   | 0.02025784   | 0.04959421   | 0.02497845   | 0.01466298   |
| 98.4          | 0.17934135   | 0.10138931   | 0.21432905   | 0.19545805   | 0.15465625   | 0.21120811   |
| 96.5          | 0.02807731   | 0.01753938   | 0.01654604   | 0.04390562   | 0.02290721   | 0.01870394   |
| 99.6          | 0.2522988    | 0.14652822   | 0.19557851   | 0.12529715   | 0.28402671   | 0.2654951    |
| 95.9          | 0.01117624   | 0.00531382   | 0.00959789   | 0.0147718    | 0.00679797   | 0.01224383   |
| 98.2          | 0.04235955   | 0.03824677   | 0.04150012   | 0.07682319   | 0.02413245   | 0.05257343   |
| 98.2          | 0.03739731   | 0.01922574   | 0.03384843   | 0.09425063   | 0.01409721   | 0.02076949   |
| 97.4          | 0.05962488   | 0.03937965   | 0.11337864   | 0.10854721   | 0.05695873   | 0.0733024    |
| 95.9          | 0.09198672   | 0.08401412   | 0.08472754   | 0.08936883   | 0.06408861   | 0.07329708   |
| 95.9          | 0.04730256   | 0.0335946    | 0.06003707   | 0.10658423   | 0.03890915   | 0.02839535   |
| 98.8          | 0.01137003   | 0.00739133   | 0.0086966    | 0.01192305   | 0.00876849   | 0.0097363    |
| 98.6          | 0.06068325   | 0.02738156   | 0.05873043   | 0.03895341   | 0.04638914   | 0.05414329   |
| 98.8          | 0.026755     | 0.01456725   | 0.02268663   | 0.02298999   | 0.0183361    | 0.02877014   |
| 97.9          | 0.01915087   | 0.01535629   | 0.01687804   | 0.01440897   | 0.02034545   | 0.01679841   |
| 98.7          | 2.8512133    | 1.58348733   | 3.05364173   | 2.58138364   | 1.50221118   | 2.27790758   |
| 95.9          | 1.10814028   | 0.7172617    | 0.72982695   | 1.0574734    | 1.01422333   | 1.78376941   |
| 100           | 0.01581806   | 0.01375304   | 0.01402834   | 0.0401867    | 0.01585439   | 0.01398767   |
| 99.7          | 1.0688617    | 0.56586835   | 0.92233196   | 1.74039286   | 0.65084429   | 0.56917228   |
| 100           | 0.0934129    | 0.12959411   | 0.138703     | 0.20729879   | 0.1061898    | 0.10319474   |
| 98.9          | 0.01860748   | 0.01438776   | 0.02124047   | 0.03989818   | 0.01199038   | 0.01333577   |

|      |            |            |            |            |            |            |
|------|------------|------------|------------|------------|------------|------------|
| 99.7 | 0.51842309 | 0.33862508 | 0.43210975 | 1.01774753 | 0.33491558 | 0.33262894 |
| 99.7 | 186.012129 | 107.435777 | 171.569516 | 351.930762 | 136.366279 | 124.96521  |
| 98.2 | 0.00038496 | 0.00092123 | 0.0002483  | 0.00062476 | 0.00023533 | 0.04519592 |
| 99   | 0.46743654 | 0.21028069 | 0.42461768 | 0.93986604 | 0.31488268 | 0.35422057 |
| 99.9 | 0.03305993 | 0.01721303 | 0.02565814 | 0.0378563  | 0.01582899 | 0.07364751 |
| 95.8 | 0.04756288 | 0.013925   | 0.01280959 | 0.05893134 | 0.01820493 | 0.00492479 |
| 97.1 | 0.03531427 | 0.01629442 | 0.00122367 | 0.0195956  | 0.00450448 | 0.00463971 |
| 98.1 | 0.07831592 | 0.06483557 | 0.07825359 | 0.16424116 | 0.04659644 | 0.05629475 |
| 97.9 | 0.05286766 | 0.02395998 | 0.05921329 | 0.05433206 | 0.0365513  | 0.04642974 |
| 95.9 | 0.1873418  | 0.11559901 | 0.13396049 | 0.59253188 | 0.0907095  | 0.09784334 |
| 98.2 | 0.01192691 | 0.00701797 | 0.00276392 | 0.00450638 | 0.00783851 | 0.00655785 |
| 98.5 | 0.36246653 | 0.18041959 | 0.20464258 | 0.27096542 | 0.21750512 | 0.19792679 |
| 98.2 | 0.41506614 | 0.22466382 | 0.70230415 | 0.50429994 | 0.29985144 | 0.5496215  |
| 95.6 | 0.27897514 | 0.17073975 | 0.36421561 | 0.39012634 | 0.20971438 | 0.2819783  |
| 99.7 | 0.38885902 | 0.25151494 | 0.40000145 | 0.46104037 | 0.3192108  | 0.40375473 |
| 99.8 | 3.64479091 | 3.57707264 | 4.13298708 | 6.64249939 | 3.7235451  | 3.76135688 |
| 98   | 0.18911324 | 0.11910665 | 0.13264705 | 0.26446741 | 0.12457046 | 0.24857443 |
| 98.4 | 0.00123699 | 0.00087624 | 0.00146514 | 0.00291502 | 0.0012185  | 0.00144121 |
| 99.2 | 0.01864413 | 0.01000765 | 0.0153333  | 0.01789475 | 0.0117894  | 0.01369015 |
| 98.5 | 0.47463395 | 0.25586225 | 0.37786977 | 0.71391641 | 0.29856454 | 0.32449301 |
| 98.5 | 0.59805824 | 0.20737962 | 0.60198621 | 1.01729189 | 0.26899892 | 0.39816455 |
| 97.2 | 0.07528209 | 0.0545243  | 0.10928305 | 0.11519969 | 0.06567767 | 0.09350569 |
| 99.7 | 0.0400213  | 0.05537551 | 0.03019664 | 0.09971714 | 0.0352134  | 0.0526898  |
| 100  | 2.23134982 | 1.3459524  | 3.50292259 | 4.91979582 | 1.7902187  | 2.27934193 |
| 97.9 | 0.93563141 | 0.6016     | 0.99826187 | 1.10380151 | 0.67034822 | 0.8125106  |
| 99.7 | 2.30089623 | 3.02711803 | 3.92142727 | 6.10627839 | 3.33625342 | 2.8861118  |
| 99.9 | 43.7767163 | 23.609652  | 47.4179057 | 58.903684  | 32.9818094 | 37.4351728 |
| 99.2 | 2.72674295 | 2.69405559 | 5.67544204 | 4.55502784 | 3.40572558 | 5.03244122 |
| 99.5 | 0.072784   | 0.07233831 | 0.06254521 | 0.10133269 | 0.03709444 | 0.0845146  |
| 97.9 | 7.42232822 | 4.49894054 | 5.71869316 | 12.9324875 | 5.87264276 | 4.30411167 |
| 97.1 | 0.54864495 | 0.39976483 | 0.65786076 | 0.78671118 | 0.45359617 | 0.5418095  |
| 95   | 1.96371249 | 1.84738699 | 2.01734452 | 4.95870263 | 2.21813362 | 1.95467852 |
| 99.6 | 4.24802263 | 2.25602845 | 3.68181113 | 4.89701694 | 2.86475186 | 3.53430596 |
| 99.6 | 0.06241159 | 0.05924553 | 0.04634854 | 0.06308363 | 0.0678824  | 0.06361066 |
| 100  | 10.6553441 | 5.73943827 | 10.5069458 | 14.507917  | 7.30603916 | 9.81931357 |
| 98.2 | 0.31286185 | 0.2195939  | 0.16874189 | 0.37563072 | 0.31618351 | 0.24350915 |
| 100  | 34.2601688 | 19.4387799 | 40.1205812 | 38.9720225 | 23.6491397 | 30.5334782 |
| 95.2 | 0.00220239 | 0.00243239 | 0.32935257 | 0.02391857 | 0.00169494 | 0.10518244 |
| 99.8 | 0.06774755 | 0.02586725 | 0.11129214 | 0.09063768 | 0.03756459 | 0.04005295 |
| 99.3 | 0.08461437 | 0.02297059 | 0.00608085 | 0.08410613 | 0.01425888 | 0.01101862 |
| 99.5 | 0.02328472 | 0.02715503 | 0.03953331 | 0.00356613 | 0.02048152 | 0.03151714 |
| 95.4 | 0.00981404 | 0.00325538 | 0.00157643 | 0.00998839 | 0.00140531 | 0.00093774 |
| 97.2 | 0.08540703 | 0.04363878 | 0.05052823 | 0.01322493 | 0.05359887 | 0.04969387 |

|      |            |            |            |            |            |            |
|------|------------|------------|------------|------------|------------|------------|
| 99.6 | 0.00712962 | 0.00548623 | 0.00333717 | 0.00934771 | 0.00249135 | 0.00639715 |
| 100  | 0.02170179 | 0.01351742 | 0.01835974 | 0.04658009 | 0.00918991 | 0.01563625 |
| 99.5 | 0.49759862 | 0.22562598 | 0.43732327 | 0.97789457 | 0.31351404 | 0.27030816 |
| 98.6 | 0.12608678 | 0.00307845 | 0.00540184 | 0.00622848 | 0.07535587 | 0.00380182 |
| 99.8 | 4.32989297 | 0.43478275 | 3.08402227 | 6.51867022 | 3.55288309 | 0.40912723 |
| 99.9 | 10.6822095 | 6.47147641 | 6.0521785  | 6.99764153 | 7.81878107 | 7.36394555 |
| 99.9 | 0.0222268  | 0.01016802 | 0.01871335 | 0.04197283 | 0.0133737  | 0.01958712 |
| 99.8 | 2.11023824 | 1.34664362 | 2.99289654 | 1.70979476 | 1.45105729 | 2.1593395  |
| 99.2 | 12.5264443 | 7.03317387 | 13.1219959 | 11.3505757 | 6.87011768 | 8.28322722 |
| 99.8 | 9.0194325  | 2.49290493 | 0.43720157 | 3.60203812 | 0.77107275 | 1.33072199 |
| 99   | 1.73108299 | 0.05972798 | 0.02309731 | 0.11193393 | 1.53776934 | 0.06294192 |
| 98.3 | 0.00421738 | 0.00286119 | 0.00790735 | 0.00161434 | 0.003759   | 0.01724565 |
| 95.2 | 0.16402389 | 0.0463328  | 0.02693846 | 0.23493012 | 0.07657174 | 0.03703925 |
| 98.5 | 0.0035345  | 0.00155879 | 0.00394511 | 0.00620018 | 0.00131703 | 0.00087995 |
| 99.7 | 0.04496508 | 0.01877449 | 0.03727452 | 0.09945513 | 0.03006338 | 0.02738267 |
| 97.2 | 0.05476976 | 0.01039433 | 0.00485503 | 0.02419785 | 0.00763645 | 0.0051544  |
| 99.5 | 0.04696262 | 0.00755121 | 0.0153619  | 0.02498751 | 0.00842511 | 0.06596858 |
| 97.8 | 0.35555568 | 0.19702863 | 0.09980981 | 0.25227185 | 4.27693986 | 1.47637806 |
| 98.2 | 0.5443047  | 0.33499845 | 0.31768358 | 0.37873621 | 0.42066122 | 0.42615296 |
| 95.3 | 1.24815532 | 0.7057307  | 1.52018437 | 2.84155164 | 0.85738612 | 0.56829377 |
| 99.3 | 0.16796717 | 0.10540554 | 0.13584708 | 0.20359496 | 0.1298048  | 0.13367006 |
| 97.2 | 0.79456083 | 0.38151071 | 0.66389822 | 1.727642   | 0.57924572 | 0.50774794 |
| 98.6 | 0.24385296 | 0.15911749 | 0.19934805 | 0.59999104 | 0.22506617 | 0.13907958 |
| 98.6 | 0.41287756 | 0.24220572 | 0.38813307 | 0.34468457 | 0.20224094 | 0.29318178 |
| 99.9 | 1.08352206 | 0.74597133 | 1.73400017 | 2.02661605 | 0.73098018 | 0.91530531 |
| 98.1 | 0.00254701 | 0.00512213 | 0.00711969 | 0.00709013 | 0.00408038 | 0.00849921 |
| 100  | 84.1934999 | 49.1405569 | 94.572439  | 120.78008  | 56.6953921 | 66.0274048 |
| 99.5 | 0.3665349  | 0.17070937 | 0.35305364 | 0.47844032 | 0.22700184 | 0.19680105 |
| 99.1 | 1.02887177 | 0.02059219 | 0.90432734 | 2.44654865 | 0.79789933 | 0.02695565 |
| 99.8 | 37.2225151 | 17.3324041 | 47.9057649 | 49.8800176 | 19.905992  | 33.5370548 |
| 98.4 | 0.28558149 | 0.21360893 | 0.24696533 | 0.34462853 | 0.25273198 | 0.23435894 |
| 99.5 | 1.19166752 | 0.77288425 | 1.52320885 | 0.29093289 | 0.71045276 | 1.72448554 |
| 99.9 | 75.2965586 | 28.8205382 | 0.45026318 | 79.1942244 | 38.1421939 | 0.31464676 |
| 95.6 | 0.46691326 | 0.13371609 | 0.25256924 | 0.30231693 | 0.2714317  | 0.39503527 |
| 95.2 | 0.04249688 | 0.01257372 | 0.0471101  | 0.03151508 | 0.01754941 | 0.0274062  |
| 99.7 | 3.50381956 | 0.92263897 | 2.95795812 | 10.6692524 | 1.05145573 | 1.11884403 |
| 96.6 | 0.00362577 | 0.00217479 | 0.00423479 | 0.32165375 | 0.00325997 | 0.0033477  |
| 95.8 | 0.03458753 | 0.02030044 | 0.04567687 | 0.03130964 | 0.0232718  | 0.02286219 |
| 99.7 | 19.0363476 | 6.89307442 | 22.9273559 | 18.3770616 | 9.40242664 | 14.500447  |
| 98.3 | 2.42620367 | 0.80612521 | 2.13928476 | 3.679765   | 0.86839129 | 1.1158222  |
| 100  | 23.3354206 | 14.5960242 | 24.258572  | 24.3214693 | 14.658567  | 18.2131338 |
| 99.8 | 17.0641427 | 11.1048541 | 18.4801464 | 34.3805416 | 11.382952  | 13.1126454 |
| 96.2 | 0.24509942 | 0.12880473 | 0.32541335 | 0.26083725 | 0.18520564 | 0.25141232 |

|      |            |            |            |            |            |            |
|------|------------|------------|------------|------------|------------|------------|
| 99.9 | 29.4224203 | 15.4586928 | 24.0328196 | 31.1829826 | 15.0141058 | 16.8894902 |
| 98.8 | 0.00884928 | 0.00593518 | 0.01131923 | 0.00558273 | 0.00681655 | 0.01266667 |
| 99.9 | 1.47669131 | 0.69824539 | 1.40521519 | 1.65962429 | 0.86972107 | 1.21125059 |
| 95.8 | 67.6647071 | 31.5203054 | 79.953909  | 95.5122529 | 41.4288179 | 40.8099017 |
| 99   | 0.17225999 | 0.09800752 | 0.12489301 | 0.18930904 | 0.11622514 | 0.14910787 |
| 98.6 | 0.0382061  | 0.02710653 | 0.04109896 | 0.04624381 | 0.02633291 | 0.03340992 |
| 100  | 0.04268396 | 0.02759525 | 0.0458137  | 0.03819989 | 0.03287928 | 0.04112086 |
| 99.4 | 0.74369455 | 0.15978409 | 0.50166735 | 3.375761   | 0.20819199 | 0.18253324 |
| 98.4 | 0.02334878 | 0.01950685 | 0.02712416 | 0.02655589 | 0.01832573 | 0.0228999  |
| 99.2 | 0.16781153 | 0.08925579 | 0.02561975 | 0.25066398 | 0.04677779 | 0.04246452 |
| 98.8 | 1.72292234 | 1.15094663 | 1.43021101 | 2.79515213 | 1.23797695 | 1.26835269 |
| 95.2 | 0.0349973  | 0.01507703 | 0.02397777 | 0.09868029 | 0.01666912 | 0.01700848 |
| 99.6 | 0.12534091 | 0.11060584 | 0.12207978 | 0.15093709 | 0.03984467 | 0.10815903 |
| 95.2 | 0.00317943 | 0.00114404 | 0.00153709 | 0.00161663 | 0.00212681 | 0.00236838 |
| 97.8 | 0.08712772 | 0.06356315 | 0.06026618 | 0.09543807 | 0.06961726 | 0.07334181 |
| 97.7 | 0.05537458 | 0.03462039 | 0.04476746 | 0.05661205 | 0.0305761  | 0.04722064 |
| 96.8 | 0.00272559 | 0.00431009 | 0.00629539 | 0.00572952 | 0.004831   | 0.00685173 |
| 97.1 | 0.02902069 | 0.01571039 | 0.02829769 | 0.02031019 | 0.01741556 | 0.02580556 |
| 97.5 | 0.26892351 | 0.14375362 | 0.29725044 | 0.34187599 | 0.14974378 | 0.21831054 |
| 99.9 | 24.6935394 | 15.4529052 | 32.0189548 | 45.4733976 | 13.0515056 | 18.3267747 |
| 99.3 | 0.24573278 | 0.18057557 | 0.32879115 | 0.5543228  | 0.1272377  | 0.19270652 |
| 97.5 | 0.02611958 | 0.02881676 | 0.03711539 | 0.06284807 | 0.01666434 | 0.02485946 |
| 99.8 | 1.21496025 | 0.95234726 | 1.03679737 | 2.94459882 | 0.95916479 | 0.76386997 |
| 99.9 | 0.07279392 | 0.04580819 | 0.12025303 | 0.10398799 | 0.04784713 | 0.05653389 |
| 98.3 | 0.44382174 | 0.19501991 | 0.29075863 | 0.41002019 | 0.29184189 | 0.29638929 |
| 97.2 | 0.08871814 | 0.04552879 | 0.07624301 | 0.11034453 | 0.0415731  | 0.05977353 |
| 98.6 | 1.87413744 | 0.85664557 | 1.25128083 | 2.48428731 | 0.8358758  | 1.01536599 |
| 99.2 | 2.20068963 | 1.18618434 | 2.17063058 | 2.60755707 | 1.84321853 | 1.89618788 |
| 98.8 | 0.19322124 | 0.05380528 | 1.95574089 | 4.13219172 | 0.10144887 | 0.17338923 |
| 96.8 | 0.29838032 | 0.41186688 | 0.26402726 | 0.66937809 | 0.22449419 | 0.36208964 |
| 99.1 | 0.01314887 | 0.00920045 | 0.01767925 | 0.01256464 | 0.00901346 | 0.01439598 |
| 96.6 | 0.07105952 | 0.00141376 | 0.01983255 | 0.02271111 | 0.05805088 | 0.00862513 |
| 96.1 | 0.02022681 | 0.00979888 | 0.01513579 | 0.03066074 | 0.0073981  | 0.01159326 |
| 96   | 0.05277938 | 0.03035024 | 0.15521493 | 0.00164627 | 0.09879926 | 0.13021311 |
| 98.3 | 0.01427712 | 0.00923805 | 0.01090131 | 0.04780224 | 0.01109613 | 0.01077931 |
| 99.8 | 0.08931607 | 0.01463357 | 0.07395419 | 0.08671486 | 0.08854345 | 0.04402839 |
| 95.1 | 0.53376842 | 0.2316045  | 0.71972115 | 0.41345112 | 0.51273222 | 0.45778509 |
| 99.1 | 0.00442907 | 0.00145433 | 0.01665124 | 0.00302366 | 0.69247846 | 0.11873668 |
| 97.5 | 0.00988143 | 0.01106368 | 0.00929897 | 0.02774587 | 0.01031992 | 0.00756558 |
| 97.8 | 0.00027881 | 0.00020982 | 0.00920063 | 0.00448434 | 0.00060414 | 0.00044997 |
| 98.3 | 0.08375025 | 0.06423933 | 0.10512611 | 0.10862715 | 0.06032406 | 0.07313081 |
| 98.3 | 2.33196352 | 2.62502375 | 2.77141995 | 2.04814917 | 2.21412535 | 2.6178352  |
| 99.7 | 0.06236803 | 0.06422299 | 0.05638276 | 0.07483627 | 0.10275112 | 0.09100482 |

|      |            |            |            |            |            |            |
|------|------------|------------|------------|------------|------------|------------|
| 95.1 | 1.87966506 | 0.37078996 | 0.25600638 | 1.96164818 | 0.41692384 | 0.33432353 |
| 98.2 | 0.01702583 | 0.0101276  | 0.01692721 | 0.01596619 | 0.01167483 | 0.01519701 |
| 99.6 | 0.05903917 | 0.02945109 | 0.01028309 | 0.08898102 | 0.01816979 | 0.01453764 |
| 96.9 | 0.10617948 | 0.05732425 | 0.09459824 | 0.10297487 | 0.04843277 | 0.08633252 |
| 99.9 | 0.84281749 | 0.52302002 | 1.25866841 | 1.47905778 | 0.49487601 | 0.73532155 |
| 99.4 | 0.02366058 | 0.01825849 | 0.03169684 | 0.03420567 | 0.01565834 | 0.0170169  |
| 98.9 | 0.71009247 | 0.42370316 | 0.91130599 | 0.98831772 | 0.45041933 | 0.54932378 |
| 96.2 | 0.06530506 | 0.02837198 | 0.06206245 | 0.05949113 | 0.02699457 | 0.00164729 |
| 98.2 | 0.02785508 | 0.02363346 | 0.03394964 | 0.0395796  | 0.01679592 | 0.02694664 |
| 97.9 | 0.40285022 | 0.40213354 | 0.3844026  | 0.5075113  | 0.4253831  | 0.37680355 |
| 99.7 | 12.6500319 | 8.86433538 | 15.5723488 | 20.7889604 | 10.2245304 | 15.1005968 |
| 99.9 | 12.5042341 | 6.6091533  | 14.1265267 | 14.6884611 | 7.6478997  | 9.52568679 |
| 95.3 | 7.83983557 | 3.88337444 | 7.83794912 | 8.16701776 | 5.24988458 | 5.34241096 |
| 97.2 | 0.419435   | 0.26489268 | 0.419316   | 0.40241342 | 0.24403253 | 0.33006538 |
| 99.3 | 0.46524253 | 0.27951208 | 0.40721828 | 0.55215212 | 0.40539603 | 0.0468396  |
| 99.9 | 0.09914184 | 0.07394952 | 0.14228091 | 0.23455354 | 0.07331495 | 0.05662606 |
| 98   | 1.50719141 | 1.30847568 | 1.774807   | 2.66397614 | 1.44320626 | 1.40956147 |
| 96.5 | 0.52571195 | 0.36266878 | 0.60359988 | 0.32104713 | 0.3751086  | 0.51765453 |

| Media<br>M7           | Media<br>M8           | TNFa500pg.n<br>T1    | TNFa500pg.n<br>T2    | TNFa500pg.n<br>T3    | TNFa500pg.n<br>T4    | TNFa500pg.n<br>T5    |
|-----------------------|-----------------------|----------------------|----------------------|----------------------|----------------------|----------------------|
| Media only c<br>44032 | Media only c<br>44032 | 500pg/mL TN<br>44032 |
| Sp07                  | Sp08                  | Sp09                 | Sp10                 | Sp11                 | Sp12                 | Sp13                 |
| 0.55471733            | 0.00779111            | 0.31679318           | 0.4603339            | 0.14767778           | 0.66839094           | 0.01375298           |
| 0.02417192            | 0.00912647            | 0.03371037           | 0.06017197           | 0.06915097           | 0.04381135           | 0.04393371           |
| 0.06203305            | 0.03532171            | 0.05139373           | 0.10308051           | 0.07701794           | 0.06708699           | 0.05623945           |
| 0.05425022            | 0.03216419            | 0.09264326           | 0.22259458           | 0.09110683           | 0.0362307            | 0.089972             |
| 0.12004282            | 0.05287261            | 0.1182013            | 0.18450357           | 0.11440745           | 0.12005349           | 0.10273635           |
| 0.02141444            | 0.01212248            | 0.02716667           | 0.02613566           | 0.02851105           | 0.02595276           | 0.03020593           |
| 0.01997295            | 0.00869402            | 0.01910497           | 0.02218272           | 0.01846265           | 0.01697481           | 0.02364542           |
| 0.0154324             | 0.00783589            | 0.01336125           | 0.01711433           | 0.01338119           | 0.01678433           | 0.01119239           |
| 0.15350259            | 0.09054648            | 0.16568369           | 0.34358872           | 0.16189416           | 0.17339821           | 0.18366787           |
| 0.11443085            | 0.06598114            | 0.0737482            | 0.08601089           | 0.09215259           | 0.1172818            | 0.05122955           |
| 0.45471624            | 0.12051609            | 0.412411             | 0.32196304           | 0.3971169            | 0.32061851           | 0.22395133           |
| 0.00479044            | 0.006314              | 0.00741417           | 0.02957252           | 0.00722196           | 0.00473929           | 0.01676442           |
| 0.08310287            | 0.05694658            | 0.07083115           | 0.1010224            | 0.10604378           | 0.10874053           | 0.0556806            |
| 1.34783933            | 0.35915574            | 0.09540087           | 6.82560565           | 3.27228505           | 0.86183994           | 5.07303339           |
| 0.16521247            | 0.17955391            | 0.24067084           | 0.34922909           | 0.21893691           | 0.13976521           | 0.34355052           |
| 0.11484174            | 0.08601477            | 0.13663569           | 0.71359767           | 0.24948742           | 0.20097238           | 0.41950686           |
| 0.01138869            | 0.01209218            | 0.01669459           | 0.03894989           | 0.02966835           | 0.019                | 0.02081412           |
| 0.0255376             | 0.01379204            | 0.03692133           | 0.04282655           | 0.03250191           | 0.04290654           | 0.03380012           |
| 0.01460617            | 0.00379458            | 0.01071413           | 0.03872667           | 0.02305169           | 0.01666697           | 0.01813459           |
| 0.17616719            | 0.07240768            | 0.16975735           | 0.1994214            | 0.16732357           | 0.17215132           | 0.15611839           |
| 0.02559391            | 0.01120957            | 0.01868144           | 0.04580678           | 0.02712393           | 0.01505156           | 0.02406305           |
| 0.11249433            | 0.06565137            | 0.15299401           | 0.3078084            | 0.21352255           | 0.12043318           | 0.15266357           |
| 0.00682876            | 0.00519557            | 0.00809542           | 0.01378734           | 0.00863717           | 0.00770962           | 0.00743714           |
| 0.02653722            | 0.02730497            | 0.02251554           | 0.05522848           | 0.03161206           | 0.03936837           | 0.02621646           |
| 0.02157296            | 0.00477821            | 0.02210101           | 0.03779394           | 0.02943929           | 0.03556933           | 0.01526269           |
| 0.03484078            | 0.05334698            | 0.06124683           | 0.07842064           | 0.06161415           | 0.04258511           | 0.07422758           |
| 0.0682874             | 0.03851284            | 0.06805831           | 0.1160835            | 0.0650282            | 0.06241186           | 0.07691931           |
| 0.03063769            | 0.04198583            | 0.03866076           | 0.04762171           | 0.03724209           | 0.03845809           | 0.05444243           |
| 0.00814238            | 0.00371725            | 0.00907936           | 0.01278212           | 0.01126974           | 0.00738439           | 0.00797502           |
| 0.04735222            | 0.03906965            | 0.04927087           | 0.05851444           | 0.05510451           | 0.04958845           | 0.04774602           |
| 0.01456634            | 0.00964591            | 0.01584923           | 0.04234142           | 0.02196302           | 0.01710676           | 0.01883108           |
| 0.00671133            | 0.00604728            | 0.01451925           | 0.03442778           | 0.01154878           | 0.00577197           | 0.02090531           |
| 1.85997503            | 0.94847192            | 1.82252203           | 2.10464064           | 1.95110533           | 2.06755162           | 1.49636133           |
| 1.01923966            | 0.49655041            | 0.68468402           | 2.26930705           | 1.17185911           | 1.27253088           | 1.14239777           |
| 0.01263248            | 0.00594455            | 0.01757827           | 0.02114055           | 0.01290795           | 0.01612185           | 0.0235444            |
| 0.61579362            | 0.20446269            | 0.69670969           | 1.04468646           | 0.71470247           | 0.51081282           | 0.56808623           |
| 0.08405615            | 0.04690123            | 0.08500342           | 0.151804             | 0.12725252           | 0.15321954           | 0.12634241           |
| 0.01250806            | 0.00611754            | 0.01235428           | 0.02296578           | 0.01218385           | 0.01473526           | 0.01691283           |

|            |            |            |            |            |            |            |
|------------|------------|------------|------------|------------|------------|------------|
| 0.3756302  | 0.13640745 | 0.35662849 | 0.56185331 | 0.29703683 | 0.38506904 | 0.35827665 |
| 124.348554 | 52.0615752 | 143.4367   | 175.091707 | 117.320052 | 115.104673 | 122.09269  |
| 0.00031464 | 0.0002843  | 0.00016152 | 0.02238478 | 0.00030251 | 0.00057604 | 0.00041952 |
| 0.33572304 | 0.15261533 | 0.29737399 | 0.44196165 | 0.34450169 | 0.29368283 | 0.37520256 |
| 0.01741766 | 0.00940752 | 0.0210292  | 0.02267814 | 0.0184318  | 0.02652192 | 0.0222686  |
| 0.02210698 | 0.0258077  | 0.01955334 | 0.01367483 | 0.01491281 | 0.1334972  | 0.01311367 |
| 0.01603202 | 0.00199712 | 0.00075292 | 0.0022918  | 0.01852741 | 0.00674601 | 0.00108914 |
| 0.0536953  | 0.02177151 | 0.04997009 | 0.01212597 | 0.05127026 | 0.06388032 | 0.06167045 |
| 0.03518001 | 0.0164793  | 0.03286423 | 0.04144184 | 0.03849753 | 0.04208675 | 0.02859037 |
| 0.13899778 | 0.03951122 | 0.14101568 | 0.0700488  | 0.13126126 | 0.12175518 | 0.06635126 |
| 0.00554886 | 0.00197877 | 0.00808446 | 0.0106412  | 0.00625038 | 0.0059885  | 0.00492316 |
| 0.45131945 | 0.1669053  | 0.34885764 | 0.21835185 | 0.18023749 | 0.19703142 | 0.14931834 |
| 0.41949571 | 0.13620959 | 0.33106781 | 0.4016235  | 0.42728945 | 0.31362506 | 0.35338906 |
| 0.2580043  | 0.11378094 | 0.21042758 | 0.30282912 | 0.27336611 | 0.25418988 | 0.22868565 |
| 0.32736648 | 0.22129824 | 0.38208149 | 0.56149476 | 0.42258017 | 0.49314754 | 0.43651951 |
| 3.46416683 | 3.36613589 | 4.01248769 | 6.41607099 | 4.48605875 | 5.23817426 | 5.96080718 |
| 0.13069083 | 0.07905943 | 0.13315724 | 0.19392369 | 0.11887576 | 0.10107828 | 0.11191504 |
| 0.00084561 | 0.00044493 | 0.00096835 | 0.00185894 | 0.00095486 | 0.00107416 | 0.00100959 |
| 0.01192725 | 0.00589649 | 0.00970037 | 0.01930109 | 0.01292093 | 0.0116815  | 0.01163554 |
| 0.27005264 | 0.10976068 | 0.33028807 | 0.49066978 | 0.28088675 | 0.3180047  | 0.28186195 |
| 0.28796412 | 0.12687369 | 0.32245998 | 0.59973123 | 0.23545711 | 0.17650429 | 0.42053231 |
| 0.06964037 | 0.04102022 | 0.14837775 | 0.22981415 | 0.18753958 | 0.19299212 | 0.13638292 |
| 0.03516007 | 0.00626838 | 0.03568624 | 0.07214608 | 0.02632147 | 0.06414996 | 0.02893674 |
| 3.48102671 | 1.08432468 | 1.0093608  | 0.86904386 | 1.30761886 | 0.94776757 | 1.66514199 |
| 0.71804291 | 0.34582134 | 0.63924933 | 1.10596814 | 0.59845689 | 0.61954475 | 0.61347645 |
| 2.49705194 | 2.43049281 | 2.13951123 | 2.20625697 | 2.8201968  | 2.42694302 | 4.44379073 |
| 30.5224512 | 16.5187665 | 28.6481073 | 41.8483304 | 29.4976895 | 28.341177  | 31.3190726 |
| 4.5700462  | 2.13907465 | 3.66396844 | 3.33216295 | 3.67926819 | 4.14323588 | 3.56557143 |
| 0.04606426 | 0.01223523 | 0.02499289 | 0.12005092 | 0.06857257 | 0.0689842  | 0.02794213 |
| 3.2885341  | 1.55737793 | 7.24037332 | 7.76798212 | 4.47384969 | 1.9387824  | 3.96050199 |
| 0.48648649 | 0.47958793 | 0.53126571 | 0.81501546 | 0.54501222 | 0.64461246 | 0.70016173 |
| 1.85383472 | 0.73991833 | 1.74390782 | 2.54487272 | 1.35025107 | 0.92159265 | 1.80139549 |
| 2.91783629 | 1.21264708 | 2.84568877 | 4.51814024 | 2.85645992 | 2.50799752 | 3.35830692 |
| 0.05802291 | 0.11428821 | 0.08805205 | 0.1212601  | 0.06144311 | 0.08779811 | 0.11814745 |
| 7.37294347 | 3.19426687 | 6.72239391 | 11.0472305 | 7.00224139 | 6.33551922 | 8.03406386 |
| 0.09236783 | 0.03442153 | 0.19638057 | 0.46243288 | 0.33444678 | 0.34374041 | 0.42046588 |
| 28.9103657 | 13.6161709 | 27.1052035 | 25.3014179 | 26.681777  | 29.7084042 | 25.5103512 |
| 0.00111281 | 0.00142482 | 0.00108311 | 0.07147643 | 0.00455495 | 0.00357835 | 0.01421268 |
| 0.05627351 | 0.01382064 | 0.05500579 | 0.0660241  | 0.07939265 | 0.05100459 | 0.05113833 |
| 0.03515804 | 0.00421071 | 0.00108038 | 0.00277028 | 0.04427484 | 0.01652224 | 0.00198629 |
| 0.04720596 | 0.01004296 | 0.04629024 | 0.01339029 | 0.02349975 | 0.0163683  | 0.01607196 |
| 0.0028448  | 0.00098511 | 0.00144328 | 0.00241354 | 0.00177317 | 0.00170768 | 0.0019783  |
| 0.08707427 | 0.023121   | 0.07723366 | 0.04223536 | 0.04183956 | 0.04585591 | 0.03645897 |

|            |            |            |            |            |            |            |
|------------|------------|------------|------------|------------|------------|------------|
| 0.00442069 | 0.00102025 | 0.00147563 | 0.00878882 | 0.006972   | 0.00464585 | 0.00279385 |
| 0.01338484 | 0.00910006 | 0.01062894 | 0.01462464 | 0.01317029 | 0.01522201 | 0.01042148 |
| 0.22788913 | 0.08165509 | 0.31778467 | 0.43166958 | 0.30400351 | 0.21766508 | 0.26775184 |
| 0.00346457 | 0.00280285 | 0.00381149 | 0.00604723 | 0.00425478 | 0.00505406 | 0.00524517 |
| 5.98278727 | 0.6819081  | 4.38761008 | 0.73756806 | 3.61705483 | 0.52740541 | 3.78585659 |
| 5.5399122  | 1.86576325 | 6.5800714  | 8.73571145 | 10.1071378 | 11.3916563 | 9.85507446 |
| 0.01078202 | 0.00484553 | 0.01220262 | 0.03845537 | 0.01769151 | 0.01273206 | 0.01691253 |
| 2.36374869 | 1.16108121 | 1.7906891  | 1.45436604 | 2.12652951 | 1.66552629 | 1.52576233 |
| 7.19558988 | 3.67831389 | 9.10018228 | 8.00651173 | 7.44685602 | 7.46586853 | 5.59911186 |
| 4.18325302 | 0.00143724 | 2.34508618 | 4.1431048  | 0.78549232 | 5.46160356 | 0.18098908 |
| 0.02885238 | 0.02680349 | 0.06790967 | 0.0270598  | 0.03981467 | 0.03443357 | 0.8215561  |
| 0.00338779 | 0.00582454 | 0.00433878 | 0.00910007 | 0.00656746 | 0.00637071 | 0.00435906 |
| 0.12881153 | 0.00155017 | 0.04408442 | 0.09444779 | 0.01695397 | 0.1364333  | 0.01576942 |
| 0.00317359 | 0.00133436 | 0.00051198 | 0.00221048 | 0.00367942 | 0.00101721 | 0.00082351 |
| 0.03004402 | 0.01107298 | 0.02352436 | 0.04309477 | 0.02231087 | 0.02779873 | 0.03744906 |
| 0.00814695 | 0.00303322 | 0.00167693 | 0.00160162 | 0.04979824 | 0.01471205 | 0.00211504 |
| 0.00704889 | 0.00410652 | 0.00883967 | 0.03400593 | 0.00910676 | 0.01063799 | 0.011191   |
| 0.79991921 | 0.416499   | 2.02012401 | 5.71352138 | 0.80832794 | 0.1940793  | 3.02411687 |
| 0.26710296 | 0.10308625 | 0.32893728 | 0.47611886 | 0.52092267 | 0.66198543 | 0.53405386 |
| 0.9423578  | 0.59644852 | 1.33808421 | 1.14998051 | 1.07638385 | 1.10934539 | 0.82898645 |
| 0.14956061 | 0.05958387 | 0.13612776 | 0.19625163 | 0.11335539 | 0.12655723 | 0.14668819 |
| 0.45094304 | 0.21531558 | 0.55544648 | 0.93375168 | 0.54461422 | 0.33335237 | 0.5617828  |
| 0.08158411 | 0.04690369 | 0.15250266 | 0.26887511 | 0.16675214 | 0.12448802 | 0.15765035 |
| 0.32498599 | 0.16656375 | 0.27693429 | 0.16269146 | 0.28061222 | 0.2729411  | 0.19628223 |
| 0.85784507 | 0.40025387 | 0.692378   | 1.03596597 | 0.97341553 | 0.80935271 | 0.76739021 |
| 0.00453533 | 0.00294335 | 0.00535285 | 0.00852862 | 0.00642716 | 0.00747505 | 0.00910913 |
| 53.9260871 | 29.5452971 | 46.5925003 | 72.9056704 | 59.7423707 | 53.8323576 | 49.6559513 |
| 0.12412315 | 0.04752155 | 0.16286035 | 0.16853395 | 0.15988222 | 0.08607718 | 0.17405485 |
| 0.0289199  | 0.01461196 | 0.72079953 | 1.06230111 | 0.71529905 | 0.00206511 | 0.76356365 |
| 40.210831  | 13.6259005 | 20.116349  | 31.3563584 | 25.8157116 | 39.663523  | 22.0907455 |
| 0.24519253 | 0.09076815 | 0.24346748 | 0.26538428 | 0.22658532 | 0.24210244 | 0.20322494 |
| 1.6542241  | 0.70257107 | 0.74116213 | 0.80645446 | 1.09332147 | 1.11844616 | 0.86143238 |
| 46.8901965 | 11.6006537 | 66.7613783 | 0.75083664 | 53.7340442 | 0.7533995  | 0.48101509 |
| 0.28820467 | 0.1332237  | 0.20986162 | 0.11377173 | 0.14947464 | 0.18056201 | 0.1252917  |
| 0.02061102 | 0.00798081 | 0.04580243 | 0.02231256 | 0.04996434 | 0.03647654 | 0.01724522 |
| 1.13948459 | 0.72549644 | 1.52198786 | 3.91272268 | 1.27513651 | 1.0471049  | 1.98189328 |
| 0.00346955 | 0.00443325 | 0.003728   | 0.00573906 | 0.00463757 | 0.16478725 | 0.00477546 |
| 0.02604355 | 0.01921029 | 0.02048087 | 0.02050379 | 0.02725138 | 0.02546652 | 0.02249792 |
| 16.5074914 | 5.96647629 | 10.0349403 | 11.3593971 | 15.0031952 | 12.2685645 | 12.0810337 |
| 1.00328399 | 0.4079219  | 1.03583804 | 2.00888531 | 0.85915988 | 0.76673085 | 1.20442589 |
| 20.1465374 | 8.56056038 | 17.8785032 | 15.5377725 | 18.3689452 | 16.3750896 | 14.2290061 |
| 9.89869887 | 5.67167594 | 12.861618  | 20.2160962 | 13.8793094 | 12.1694665 | 13.1442243 |
| 0.26167686 | 0.12645278 | 0.19971707 | 0.15077237 | 0.19890819 | 0.19177899 | 0.14908027 |

|            |            |            |            |            |            |            |
|------------|------------|------------|------------|------------|------------|------------|
| 19.4009142 | 7.53219297 | 17.9557445 | 17.6175105 | 21.1321775 | 16.9390702 | 13.5282997 |
| 0.00807377 | 0.0066052  | 0.0082192  | 0.01373311 | 0.00861532 | 0.01215572 | 0.00703146 |
| 1.13678433 | 0.51917928 | 0.89245372 | 1.13258894 | 0.86422688 | 0.89361291 | 0.84875011 |
| 56.6703963 | 15.9511897 | 45.7844287 | 51.6351386 | 55.3172957 | 55.9408836 | 44.6804787 |
| 0.16572342 | 0.06936337 | 0.16935917 | 0.19817027 | 0.14296835 | 0.16699805 | 0.13724154 |
| 0.02926024 | 0.01571874 | 0.02786058 | 0.03387447 | 0.02785125 | 0.03312629 | 0.02452387 |
| 0.01650678 | 0.01148013 | 0.0300194  | 0.05013373 | 0.03148792 | 0.02451665 | 0.03239506 |
| 0.21927542 | 0.09892454 | 0.32604318 | 0.65085075 | 0.21243932 | 0.15303086 | 0.32939564 |
| 0.01905059 | 0.01154415 | 0.02064074 | 0.03589925 | 0.02457284 | 0.02738221 | 0.02349135 |
| 0.09710967 | 0.01140059 | 0.00868928 | 0.02748286 | 0.16964801 | 0.05098268 | 0.01110902 |
| 0.77653695 | 0.53312366 | 1.24000042 | 2.1357946  | 1.21233363 | 1.47305235 | 1.36715381 |
| 0.05311935 | 0.01191365 | 0.00966668 | 0.01450077 | 0.04819253 | 0.01923506 | 0.01697532 |
| 0.03387306 | 0.02765264 | 0.08787807 | 0.17381323 | 0.06996032 | 0.20553308 | 0.19332963 |
| 0.00808187 | 0.00603155 | 0.00628419 | 0.00147889 | 0.0009853  | 0.00333963 | 0.00145277 |
| 0.0615925  | 0.02515482 | 0.06576669 | 0.08149653 | 0.07112525 | 0.05124972 | 0.05576196 |
| 0.03467924 | 0.02192562 | 0.03681889 | 0.09402923 | 0.0377748  | 0.04591166 | 0.03972533 |
| 0.00922596 | 0.00190879 | 0.00435414 | 0.00310675 | 0.00082309 | 0.00354889 | 0.00051933 |
| 0.02457218 | 0.01443638 | 0.02124221 | 0.02231573 | 0.01565096 | 0.01816404 | 0.01978485 |
| 0.21476078 | 0.10544442 | 0.24189058 | 0.29568742 | 0.23320012 | 0.22454075 | 0.26903912 |
| 19.4967034 | 8.40324585 | 14.3324553 | 25.9378517 | 22.8669711 | 17.6707003 | 14.5251851 |
| 0.18150879 | 0.07511268 | 0.1342792  | 0.23501972 | 0.22824284 | 0.13246129 | 0.16639678 |
| 0.02420437 | 0.04427063 | 0.02017458 | 0.02792864 | 0.02973845 | 0.02894216 | 0.02727836 |
| 0.75523557 | 0.45114539 | 0.71463631 | 1.52304296 | 0.96179982 | 0.88407973 | 0.9508381  |
| 0.06417633 | 0.09390175 | 0.04994143 | 0.05590914 | 0.06502512 | 0.08223701 | 0.06275498 |
| 0.00526118 | 0.07689911 | 0.27499211 | 0.31726671 | 0.17852732 | 0.24234419 | 0.18214361 |
| 0.04355356 | 0.01718744 | 0.04480818 | 0.060924   | 0.04478476 | 0.04255971 | 0.03599139 |
| 1.05143151 | 0.4773893  | 1.09949786 | 1.47349293 | 0.99469801 | 0.85940277 | 0.83041176 |
| 1.89920567 | 0.97288899 | 1.83231401 | 1.8754433  | 1.43979604 | 1.37890913 | 1.70708554 |
| 0.03678364 | 0.06111383 | 0.45346603 | 0.07880063 | 0.05564023 | 0.14147969 | 0.1591028  |
| 0.20128276 | 0.1472094  | 0.18126213 | 0.46577653 | 0.18286654 | 0.42477719 | 0.24910828 |
| 0.01240129 | 0.00615697 | 0.00918039 | 0.01606052 | 0.01253531 | 0.01012313 | 0.01136271 |
| 0.00107058 | 0.00320417 | 0.02911694 | 0.00037738 | 0.03757756 | 0.01520199 | 0.00025004 |
| 0.01214391 | 0.00448549 | 0.00947188 | 0.03476655 | 0.01051838 | 0.01620655 | 0.01038052 |
| 0.10129619 | 0.04303899 | 0.05132495 | 0.00106525 | 0.12316559 | 0.11882853 | 0.00031611 |
| 0.00699585 | 0.0031587  | 0.01004144 | 0.01032388 | 0.01031332 | 0.01125175 | 0.00894689 |
| 0.04987963 | 0.02345361 | 0.05529513 | 0.01695773 | 0.014823   | 0.04064482 | 0.05293954 |
| 0.56632449 | 0.13111904 | 0.5665303  | 0.43462153 | 0.58519541 | 0.44954138 | 0.46110544 |
| 0.0181115  | 0.00079271 | 0.02922441 | 0.00263213 | 0.19822085 | 0.00075352 | 0.17385328 |
| 0.00683882 | 0.00140404 | 0.00574605 | 0.02077402 | 0.01082711 | 0.00744059 | 0.0060174  |
| 0.00322205 | 0.0018653  | 0.00025947 | 0.00227703 | 0.00019493 | 0.00421447 | 0.00235552 |
| 0.08923364 | 0.13458364 | 0.07906489 | 0.08136212 | 0.0894638  | 0.13062474 | 0.07317071 |
| 2.10266452 | 1.89893159 | 2.38850113 | 2.93232887 | 3.01886414 | 5.55716327 | 2.78341912 |
| 0.0625656  | 0.05410407 | 0.04864895 | 0.05671911 | 0.09361253 | 0.11348739 | 0.03871616 |

|            |            |            |            |            |            |            |
|------------|------------|------------|------------|------------|------------|------------|
| 1.19357628 | 0.30158294 | 0.10016413 | 0.13507532 | 2.33058711 | 0.56051305 | 0.16416817 |
| 0.01137348 | 0.00642703 | 0.0088028  | 0.016654   | 0.01174098 | 0.01060092 | 0.01256449 |
| 0.03013398 | 0.00362546 | 0.00306623 | 0.00880152 | 0.03782738 | 0.01845947 | 0.00399187 |
| 0.0838374  | 0.04805654 | 0.06243857 | 0.04398952 | 0.08651246 | 0.0003369  | 0.03708969 |
| 0.51637983 | 0.24944228 | 0.52143194 | 0.90605226 | 0.65801526 | 0.54395094 | 0.62536294 |
| 0.01572397 | 0.01138798 | 0.01447895 | 0.01952576 | 0.01658502 | 0.01704167 | 0.01627973 |
| 0.50935961 | 0.24842841 | 0.48005961 | 0.50850983 | 0.61351138 | 0.4735535  | 0.43122977 |
| 0.04858267 | 0.0304086  | 0.03115293 | 0.03996244 | 0.05094054 | 0.05878225 | 0.0242922  |
| 0.03221973 | 0.03230435 | 0.03022521 | 0.01306925 | 0.02553396 | 0.03630293 | 0.01716454 |
| 0.35209909 | 0.79142775 | 0.48887875 | 0.38492231 | 0.4572237  | 0.50329456 | 0.39468714 |
| 8.55874573 | 5.2449138  | 8.94276596 | 16.0346441 | 11.2290263 | 8.99289063 | 11.0126725 |
| 9.37836248 | 3.9154998  | 7.8409012  | 8.74162047 | 8.64979624 | 7.95736747 | 7.47532364 |
| 5.68943098 | 1.83083683 | 4.99493873 | 4.32634663 | 5.48402624 | 4.62565555 | 3.61164173 |
| 0.30138691 | 0.23842004 | 0.30351409 | 0.40199317 | 0.29321691 | 0.32081267 | 0.25263013 |
| 0.36080115 | 0.16688894 | 0.35615999 | 0.38377295 | 0.30840017 | 0.26055763 | 0.30165844 |
| 0.06892463 | 0.04811767 | 0.03872214 | 0.06400805 | 0.04496729 | 0.05655217 | 0.04147564 |
| 1.28913089 | 0.96969013 | 1.31658189 | 1.67995356 | 1.43765247 | 1.49559931 | 1.52714893 |
| 0.61495807 | 0.3134476  | 0.56784388 | 0.41684009 | 0.39082951 | 0.49707658 | 0.39910324 |

| TNFa500pg.n | TNFa500pg.n | TNFa500pg.n | Butyrate500u | Butyrate500u | Butyrate500u | Butyrate500u |
|-------------|-------------|-------------|--------------|--------------|--------------|--------------|
| T6          | T7          | T8          | B1           | B2           | B3           | B4           |
| 500pg/mL TN | 500pg/mL TN | 500pg/mL TN | 500µM Butyr  | 500µM Butyr  | 500µM Butyr  | 500µM Butyr  |
| 44032       | 44032       | 44032       | 44032        | 44032        | 44032        | 44032        |
| Sp14        | Sp15        | Sp16        | Sp17         | Sp18         | Sp19         | Sp20         |
| 0.05940985  | 0.01665791  | 0.22356312  | 1.24145504   | 0.21847884   | 0.32787324   | 0.04537349   |
| 0.06482396  | 0.06486564  | 0.02716867  | 0.06338874   | 0.02045255   | 0.0904223    | 0.03735325   |
| 0.15056148  | 0.08697819  | 0.05987263  | 0.0857537    | 0.05725064   | 0.11264572   | 0.08149182   |
| 0.21925856  | 0.05745669  | 0.07644218  | 0.15260083   | 0.00407214   | 0.14004583   | 0.11197257   |
| 0.2500603   | 0.15483512  | 0.0916033   | 0.17312998   | 0.0743283    | 0.15534845   | 0.13620448   |
| 0.0349459   | 0.03001041  | 0.02312222  | 0.03221098   | 0.02062373   | 0.02676093   | 0.03012279   |
| 0.05038002  | 0.02561704  | 0.01499381  | 0.02910721   | 0.01246806   | 0.02644874   | 0.02464789   |
| 0.01802657  | 0.01653297  | 0.01037628  | 0.0179978    | 0.01122371   | 0.01968909   | 0.01043499   |
| 0.36664791  | 0.21130657  | 0.14701677  | 0.23939621   | 0.13908625   | 0.25710955   | 0.24717448   |
| 0.04218457  | 0.08662051  | 0.057065    | 0.06997851   | 0.10240917   | 0.07715912   | 0.06336702   |
| 0.57602015  | 0.45931768  | 0.19106703  | 0.67290085   | 0.19122346   | 0.89126551   | 0.4968022    |
| 0.04549258  | 0.0065307   | 0.00841738  | 0.01818075   | 0.00876794   | 0.0254878    | 0.01696305   |
| 0.15506675  | 0.12582965  | 0.07830342  | 0.11378966   | 0.08586427   | 0.11930017   | 0.08440316   |
| 3.89054401  | 2.15817294  | 1.07396721  | 5.8599338    | 1.36756914   | 4.52390609   | 1.60897553   |
| 0.50652571  | 0.26170852  | 0.1881856   | 0.35878991   | 0.18749217   | 0.43620946   | 0.31821608   |
| 0.6459865   | 0.20589722  | 0.2667268   | 0.18219767   | 0.19656397   | 0.43774288   | 0.23473273   |
| 0.04941658  | 0.02544753  | 0.01859107  | 0.04374174   | 0.01941202   | 0.04789938   | 0.05205548   |
| 0.06941319  | 0.04531623  | 0.04756057  | 0.04364001   | 0.01808244   | 0.03197868   | 0.04906505   |
| 0.04467118  | 0.01613617  | 0.0149285   | 0.02012029   | 0.01352558   | 0.02898705   | 0.02834443   |
| 0.26447509  | 0.29211853  | 0.20030446  | 0.23991992   | 0.09213148   | 0.23949798   | 0.22963216   |
| 0.06414699  | 0.02563767  | 0.0201082   | 0.03599178   | 0.01813187   | 0.03023106   | 0.034257     |
| 0.37934098  | 0.17301207  | 0.13030716  | 0.26926272   | 0.12396315   | 0.24090473   | 0.19930858   |
| 0.0218997   | 0.01036094  | 0.00570748  | 0.01163139   | 0.00691991   | 0.01505345   | 0.00782538   |
| 0.0839859   | 0.03727946  | 0.03105956  | 0.03202868   | 0.03129123   | 0.03764111   | 0.04507937   |
| 0.04629834  | 0.02459948  | 0.01456547  | 0.02220511   | 0.00936274   | 0.03827601   | 0.02615208   |
| 0.00679107  | 0.07077758  | 0.05109305  | 0.09525576   | 0.05303773   | 0.12030521   | 0.08741666   |
| 0.15072307  | 0.09022548  | 0.05857263  | 0.09924835   | 0.05738796   | 0.10258299   | 0.0896138    |
| 0.111845    | 0.03718682  | 0.03940045  | 0.02254428   | 0.0278861    | 0.04220854   | 0.03478603   |
| 0.02022551  | 0.0087482   | 0.00539058  | 0.01149084   | 0.00070757   | 0.01163297   | 0.00882283   |
| 0.08166206  | 0.05394481  | 0.03287961  | 0.06149452   | 0.0374861    | 0.04768367   | 0.04866414   |
| 0.04363122  | 0.01981625  | 0.01346409  | 0.0269091    | 0.01539366   | 0.02615218   | 0.01850388   |
| 0.03449864  | 0.01140897  | 0.01321715  | 0.02394413   | 0.00852408   | 0.02278965   | 0.02119591   |
| 2.9519129   | 2.28529091  | 1.46840768  | 2.52510212   | 1.37617634   | 2.87231681   | 2.27360339   |
| 1.43423711  | 1.16664206  | 1.15985147  | 0.57732191   | 0.42868171   | 1.9154607    | 1.41330065   |
| 0.03073191  | 0.01985813  | 0.01004662  | 0.01814234   | 0.00543863   | 0.02512952   | 0.01647762   |
| 2.04909736  | 0.80508539  | 0.4726384   | 1.15763212   | 0.3215908    | 1.41944785   | 1.10880859   |
| 0.12200085  | 0.10751668  | 0.10894085  | 0.08587177   | 0.11992982   | 0.12819438   | 0.1068126    |
| 0.03399538  | 0.0143173   | 0.01151833  | 0.01157036   | 0.0064996    | 0.01928696   | 0.01473009   |

|            |            |            |            |            |            |            |
|------------|------------|------------|------------|------------|------------|------------|
| 0.79040081 | 0.35947764 | 0.30792081 | 0.64598671 | 0.23089073 | 0.4943374  | 0.40296586 |
| 311.04715  | 130.148162 | 89.1396356 | 210.723578 | 72.744061  | 197.840018 | 168.401882 |
| 0.00989041 | 0.00024998 | 0.00251621 | 0.00021275 | 0.00039723 | 0.00031429 | 0.00029524 |
| 0.93866477 | 0.4845305  | 0.24559095 | 0.33151284 | 0.15087561 | 0.47148482 | 0.36871261 |
| 0.0521393  | 0.02202153 | 0.01617318 | 0.0280767  | 0.01298252 | 0.03597    | 0.02543749 |
| 0.0590804  | 0.02051307 | 0.0122039  | 0.011227   | 0.00552105 | 0.032203   | 0.01695262 |
| 0.04957812 | 0.01393494 | 0.00805494 | 0.01274146 | 0.00234957 | 0.01494292 | 0.03313307 |
| 0.15900698 | 0.06176769 | 0.05859098 | 0.05721888 | 0.03912584 | 0.09164148 | 0.13935435 |
| 0.0625668  | 0.0436477  | 0.02056902 | 0.04297451 | 0.02963783 | 0.05780004 | 0.03798045 |
| 0.13695291 | 0.09185265 | 0.07642317 | 0.4288894  | 0.07590765 | 0.1119717  | 0.15468641 |
| 0.007801   | 0.00934674 | 0.01181067 | 0.00683425 | 0.00158515 | 0.00768719 | 0.00662592 |
| 0.35629537 | 0.26886798 | 0.21651077 | 0.29992152 | 0.23907981 | 0.2231648  | 0.21262112 |
| 1.0520331  | 0.5712913  | 0.21431765 | 0.58014841 | 0.23064416 | 0.90044455 | 0.46357978 |
| 0.55580751 | 0.30976213 | 0.19531678 | 0.31702074 | 0.20427434 | 0.43679844 | 0.28795166 |
| 0.76396652 | 0.55254744 | 0.31450794 | 0.45479979 | 0.31518247 | 0.48894088 | 0.35268126 |
| 8.81804275 | 5.45189198 | 4.88883191 | 4.00938209 | 3.82415786 | 4.65266293 | 5.30564149 |
| 0.3114315  | 0.17938445 | 0.08314105 | 0.16885172 | 0.07416308 | 0.22399069 | 0.11600076 |
| 0.00221222 | 0.00108033 | 0.00076911 | 0.00102472 | 0.00070726 | 0.00145983 | 0.00103027 |
| 0.02373354 | 0.01283139 | 0.00858077 | 0.0206642  | 0.00818163 | 0.01964003 | 0.01179936 |
| 0.79632326 | 0.37582548 | 0.21716876 | 0.42238666 | 0.15380124 | 0.43522395 | 0.3249979  |
| 1.24429763 | 0.45534238 | 0.15778927 | 0.40613769 | 0.11172667 | 0.63884689 | 0.30555144 |
| 0.36215204 | 0.20111613 | 0.11648663 | 0.13081881 | 0.09738944 | 0.19447687 | 0.12261043 |
| 0.1230894  | 0.03426568 | 0.09770188 | 0.06987968 | 0.0162569  | 0.05148981 | 0.0532588  |
| 4.36858896 | 2.62200461 | 1.25138973 | 1.41861002 | 1.5026722  | 1.59437934 | 1.35681584 |
| 1.49561242 | 0.76429182 | 0.41387008 | 0.82345658 | 0.42421749 | 1.09461655 | 0.72238171 |
| 7.11559216 | 2.86657457 | 2.6872552  | 3.19387697 | 2.3010081  | 0.36475028 | 3.16302974 |
| 70.1853506 | 38.2666797 | 23.5460884 | 39.601209  | 21.2855822 | 46.1544177 | 37.8553034 |
| 6.30167166 | 5.13086513 | 2.52937469 | 2.40631995 | 2.7864117  | 4.97961161 | 3.49054224 |
| 0.16611777 | 0.04730964 | 0.07069245 | 0.08016063 | 0.03061749 | 0.08895153 | 0.06753792 |
| 18.0608626 | 4.47547679 | 4.1364423  | 6.62238661 | 1.83722887 | 8.28921561 | 4.01778837 |
| 1.00755301 | 0.6045872  | 0.54869983 | 0.50129916 | 0.44919284 | 0.65153509 | 0.57216268 |
| 5.50553115 | 2.29171081 | 1.75647875 | 1.98897473 | 0.91467378 | 2.34653998 | 1.4741725  |
| 7.80018538 | 4.15532757 | 2.18264241 | 2.83789773 | 1.45333004 | 3.13520237 | 2.1592082  |
| 0.17812146 | 0.0909862  | 0.10106493 | 0.0701519  | 0.07369817 | 0.04353572 | 0.07120532 |
| 18.7126525 | 9.82207905 | 5.19243833 | 7.7956148  | 4.0246915  | 9.89099299 | 6.64219454 |
| 0.62315846 | 0.39069966 | 0.23175188 | 0.32257424 | 0.12296398 | 0.28758894 | 0.33926132 |
| 36.3772109 | 36.5938033 | 19.4002578 | 27.0938764 | 19.3029046 | 29.9423992 | 25.2664898 |
| 0.01985619 | 0.00218735 | 0.00576616 | 0.01050191 | 0.00394038 | 0.02462635 | 0.01109869 |
| 0.1223145  | 0.09558454 | 0.02169336 | 0.04723738 | 0.01922237 | 0.08432262 | 0.04763814 |
| 0.05088983 | 0.03660305 | 0.01391736 | 0.02620284 | 0.00545829 | 0.02061182 | 0.07266466 |
| 0.02609283 | 0.02535463 | 0.03176413 | 0.03440209 | 0.00029728 | 0.01857316 | 0.02919471 |
| 0.00237928 | 0.00545458 | 0.00195539 | 0.00217456 | 0.00066412 | 0.00211217 | 0.02201794 |
| 0.05912748 | 0.0586947  | 0.06958422 | 0.07060146 | 0.04572596 | 0.03808914 | 0.06211307 |

|            |            |            |            |            |            |            |
|------------|------------|------------|------------|------------|------------|------------|
| 0.01119473 | 0.00317979 | 0.00569209 | 0.00583896 | 0.00261451 | 0.00444316 | 0.00543874 |
| 0.03283291 | 0.01734629 | 0.00973897 | 0.011141   | 0.01022849 | 0.02180936 | 0.01654067 |
| 0.81995687 | 0.31437657 | 0.18682362 | 0.51349422 | 0.12043084 | 0.60863214 | 0.48824148 |
| 0.00851549 | 0.08213106 | 0.08763893 | 0.00386727 | 0.0034313  | 0.00502413 | 0.09139123 |
| 5.47860428 | 5.43507461 | 2.49633335 | 3.42682892 | 2.49138679 | 0.86503481 | 0.35872519 |
| 9.04748905 | 8.44656048 | 5.42553647 | 7.64095461 | 4.5231779  | 6.76784819 | 5.7508604  |
| 0.04813327 | 0.01396978 | 0.01185119 | 0.01564595 | 0.01020992 | 0.02383037 | 0.01625476 |
| 1.65727265 | 2.25119365 | 1.4461731  | 2.75994931 | 1.86209397 | 2.6431259  | 2.34860693 |
| 12.7591851 | 8.53498296 | 5.63955772 | 10.5552532 | 4.90010341 | 10.1275103 | 9.54271589 |
| 0.01870981 | 0.00313291 | 0.9020537  | 19.4990004 | 1.51170434 | 3.51001019 | 0.03221262 |
| 0.06586625 | 0.05190097 | 2.12881549 | 0.02587305 | 0.01137385 | 0.07576304 | 0.04108952 |
| 0.00230388 | 0.00644851 | 0.01047833 | 0.02342189 | 0.01331841 | 0.01065964 | 0.01040203 |
| 0.00783914 | 0.00417195 | 0.1195628  | 0.47273182 | 0.04423714 | 0.10392651 | 0.00634451 |
| 0.00379059 | 0.00260145 | 0.00079473 | 0.00078146 | 0.00083537 | 0.00122088 | 0.00228668 |
| 0.07612731 | 0.02977371 | 0.01650552 | 0.04167021 | 0.01499518 | 0.03825876 | 0.03078772 |
| 0.02156457 | 0.02256773 | 0.00862769 | 0.00860102 | 0.00353986 | 0.00813997 | 0.03763834 |
| 0.02693252 | 0.00907766 | 0.00919217 | 0.00829516 | 0.01085974 | 0.02055468 | 0.00943451 |
| 1.10672496 | 1.56151024 | 1.3941489  | 4.41421049 | 1.01117682 | 0.19282952 | 0.02144171 |
| 0.47554906 | 0.42840561 | 0.29342804 | 0.3617774  | 0.12890939 | 0.33312455 | 0.32204779 |
| 1.44311355 | 1.17031932 | 0.6069308  | 1.18595067 | 0.0352589  | 1.43339275 | 1.10724549 |
| 0.30720429 | 0.17102766 | 0.12523772 | 0.14165695 | 0.0722441  | 0.18113754 | 0.10678833 |
| 1.71732816 | 0.55832256 | 0.32761715 | 0.78267077 | 0.17263676 | 0.93784291 | 0.6724622  |
| 0.41311651 | 0.20398057 | 0.13751173 | 0.26313377 | 0.058615   | 0.29403125 | 0.24956209 |
| 0.18319104 | 0.28883225 | 0.19897453 | 0.21714779 | 0.22059186 | 0.00318297 | 0.22875911 |
| 1.42696013 | 1.00126217 | 0.60854873 | 1.0193212  | 0.60116253 | 1.53350105 | 1.12610854 |
| 0.01368698 | 0.00696768 | 0.00631902 | 0.00637121 | 0.00678517 | 0.0064359  | 0.00642826 |
| 98.6153047 | 60.081323  | 41.5328069 | 66.7906401 | 37.1124411 | 86.0866366 | 64.385043  |
| 0.5773236  | 0.28710732 | 0.12525446 | 0.32025139 | 0.07689931 | 0.36975225 | 0.25403159 |
| 1.71889083 | 0.79802354 | 0.5420612  | 0.82812035 | 0.04113706 | 0.93942894 | 0.76572144 |
| 40.4588866 | 31.2546707 | 18.9235159 | 17.9202386 | 21.3734325 | 36.7108504 | 30.2769759 |
| 0.34012656 | 0.2123775  | 0.22911318 | 0.27317173 | 0.1843736  | 0.28199222 | 0.30805876 |
| 0.57720343 | 1.36213888 | 0.80121768 | 1.38744946 | 1.25051092 | 0.94145057 | 1.23330459 |
| 115.856776 | 0.88150602 | 0.51987962 | 0.67095671 | 0.47991433 | 0.28101455 | 53.6788126 |
| 0.26594484 | 0.19662669 | 0.22994898 | 0.0235494  | 0.24857122 | 0.13759565 | 0.17205578 |
| 0.03192665 | 0.05337845 | 0.01190678 | 0.04797222 | 0.00932324 | 0.03902188 | 0.03088213 |
| 8.23888108 | 1.72683064 | 0.74940629 | 1.80998432 | 0.3846109  | 3.32169412 | 1.84186096 |
| 0.1006851  | 0.00390931 | 0.00405639 | 0.00332297 | 0.0643999  | 0.00371908 | 0.00341074 |
| 0.02341718 | 0.02577569 | 0.02100443 | 0.0316676  | 0.02037732 | 0.04470805 | 0.03309391 |
| 17.443318  | 15.4111553 | 7.54052683 | 12.5785085 | 10.6046999 | 19.1842989 | 13.4105861 |
| 3.0223637  | 1.39341403 | 0.65564341 | 1.32173924 | 0.35581844 | 2.25849558 | 1.22943822 |
| 20.7588884 | 20.9449061 | 13.0957136 | 22.3580257 | 13.8144781 | 24.6297313 | 19.6647471 |
| 30.0369779 | 14.7191905 | 9.30770528 | 15.9344055 | 7.69736532 | 20.8316513 | 15.9470436 |
| 0.214969   | 0.25972059 | 0.10402246 | 0.23952275 | 0.18733852 | 0.2586802  | 0.19391455 |

|            |            |            |            |            |            |            |
|------------|------------|------------|------------|------------|------------|------------|
| 25.8058064 | 22.2754025 | 12.6617166 | 24.2909026 | 11.1684158 | 26.3745617 | 27.1725888 |
| 0.01316082 | 0.01433904 | 0.00985264 | 0.01209295 | 0.00957623 | 0.01171178 | 0.00945737 |
| 2.5058439  | 1.23381239 | 0.79938339 | 1.10791752 | 0.59046121 | 1.28323194 | 0.95844603 |
| 89.4807533 | 61.4530197 | 29.7781151 | 56.1139669 | 22.9298635 | 71.7655028 | 46.1144705 |
| 0.28373976 | 0.18742602 | 0.12916337 | 0.12021301 | 0.0925863  | 0.15095936 | 0.10760853 |
| 0.04174835 | 0.03728606 | 0.03004372 | 0.0319119  | 0.0342151  | 0.0405649  | 0.04157082 |
| 0.07521398 | 0.0471702  | 0.01945427 | 0.04008622 | 0.01457701 | 0.05026677 | 0.04934749 |
| 1.95397179 | 0.31185749 | 0.11314416 | 0.40779413 | 0.02955752 | 0.62003369 | 0.33296343 |
| 0.03879245 | 0.02893921 | 0.02189224 | 0.030154   | 0.01742763 | 0.03079098 | 0.02816125 |
| 0.19620458 | 0.07825909 | 0.04336935 | 0.06370736 | 0.02694123 | 0.05524655 | 0.1584819  |
| 1.58095266 | 1.49719159 | 1.12259166 | 1.19922689 | 0.95768613 | 1.63738562 | 1.27841766 |
| 0.06422172 | 0.02660926 | 0.00567821 | 0.01186027 | 0.01044279 | 0.0218902  | 0.02243963 |
| 0.15282136 | 0.05966241 | 0.05110358 | 0.06796007 | 0.04241183 | 0.10193059 | 0.03073315 |
| 0.00221999 | 0.00189946 | 0.01220616 | 0.00515445 | 0.02436575 | 0.00061474 | 0.00179732 |
| 0.09354836 | 0.06567145 | 0.04990808 | 0.08952511 | 0.04647894 | 0.05667098 | 0.05968265 |
| 0.08600005 | 0.04259805 | 0.04114713 | 0.05124842 | 0.03284041 | 0.06273792 | 0.0553988  |
| 0.00152593 | 0.00109205 | 0.0133745  | 0.00126905 | 0.00111641 | 0.00499185 | 0.01073714 |
| 0.03517436 | 0.02475415 | 0.01642938 | 0.01954308 | 0.01644796 | 0.02022785 | 0.01604965 |
| 0.32707455 | 0.30094019 | 0.10245381 | 0.17746086 | 0.08182334 | 0.24239164 | 0.1242467  |
| 45.1945993 | 23.5509119 | 14.8396112 | 24.01878   | 12.4372848 | 31.5568165 | 28.5296535 |
| 0.61140523 | 0.2619005  | 0.12397559 | 0.20616347 | 0.1154652  | 0.34044457 | 0.27775029 |
| 0.0307232  | 0.0194825  | 0.0257372  | 0.02351555 | 0.03524036 | 0.02854236 | 0.02726349 |
| 1.81623146 | 0.92144348 | 0.92403349 | 0.77106486 | 0.71403184 | 1.10030272 | 1.20817943 |
| 0.06781841 | 0.05410618 | 0.05673389 | 0.05706256 | 0.0677331  | 0.0732206  | 0.06383496 |
| 0.47236882 | 0.25671588 | 0.14076698 | 0.22964824 | 0.1069704  | 0.26629355 | 0.17261721 |
| 0.10769871 | 0.05016853 | 0.03129066 | 0.06017477 | 0.02621889 | 0.07111022 | 0.04742523 |
| 2.31206375 | 1.02314358 | 0.83274686 | 1.47449258 | 0.61395287 | 1.48555104 | 1.06082998 |
| 3.15889549 | 1.65936804 | 0.93905897 | 2.26079621 | 0.89104572 | 2.11639749 | 1.33894978 |
| 0.66568246 | 3.01700606 | 0.01946253 | 0.17856653 | 0.43289039 | 0.17482358 | 0.80927854 |
| 0.39508226 | 0.28822222 | 0.31391359 | 0.43846671 | 0.30542718 | 0.39181872 | 0.46071636 |
| 0.01797429 | 0.0112259  | 0.00883665 | 0.01276378 | 0.01004914 | 0.0151842  | 0.01612264 |
| 0.0007669  | 0.04121365 | 0.00032393 | 0.01049352 | 0.00281471 | 0.00085389 | 0.00309477 |
| 0.02044608 | 0.0110605  | 0.0096905  | 0.01411583 | 0.00726112 | 0.01752289 | 0.0110737  |
| 0.15994026 | 0.00825151 | 0.06037569 | 0.10561172 | 0.06279928 | 0.00130366 | 0.10669602 |
| 0.01366946 | 0.01029398 | 0.00764328 | 0.01478507 | 0.00191238 | 0.02656864 | 0.01452363 |
| 0.12821859 | 0.02149181 | 0.02193557 | 0.01795129 | 0.05399132 | 0.06234517 | 0.06698559 |
| 1.03066968 | 0.87246634 | 0.28935025 | 0.47702542 | 0.20512881 | 0.56030199 | 0.38077908 |
| 0.07562707 | 0.0273252  | 0.00231748 | 0.21698659 | 0.00187874 | 0.10054253 | 0.01176757 |
| 0.01589724 | 0.00975089 | 0.00761712 | 0.01219207 | 0.00634895 | 0.01573215 | 0.00915736 |
| 0.00052029 | 0.00156701 | 0.00021298 | 0.00034307 | 0.00138194 | 0.00049239 | 0.00048061 |
| 0.07857637 | 0.0710476  | 0.07822558 | 0.07837382 | 0.11829098 | 0.11057188 | 0.09514062 |
| 2.07021112 | 2.4854021  | 3.17538111 | 2.00699842 | 4.77435795 | 2.23091406 | 2.07323902 |
| 0.04798303 | 0.05714127 | 0.0957372  | 0.06733689 | 0.20591699 | 0.07346463 | 0.08112441 |

|            |            |            |            |            |            |            |
|------------|------------|------------|------------|------------|------------|------------|
| 0.86103778 | 0.7785996  | 0.15841798 | 0.42892477 | 0.31252422 | 0.4083631  | 0.75547657 |
| 0.01860933 | 0.01190738 | 0.00929817 | 0.01404854 | 0.00925399 | 0.01527207 | 0.01057485 |
| 0.0640972  | 0.02287472 | 0.01758593 | 0.0234852  | 0.01063024 | 0.02131021 | 0.04913817 |
| 0.03765167 | 0.06050345 | 0.05436255 | 0.06252865 | 0.08409089 | 0.00078551 | 0.04994757 |
| 1.16048238 | 0.68070611 | 0.3454983  | 0.75980079 | 0.39143163 | 1.02795948 | 0.70153957 |
| 0.02582301 | 0.02041381 | 0.01419309 | 0.01410421 | 0.02328367 | 0.02768793 | 0.02289958 |
| 0.94851321 | 0.57672413 | 0.34293383 | 0.66076339 | 0.28275785 | 0.85047758 | 0.51885743 |
| 0.01956772 | 0.00085758 | 0.03037895 | 0.03207165 | 0.00060361 | 0.03152636 | 0.02501131 |
| 0.01396045 | 0.03188779 | 0.02610346 | 0.02358032 | 0.0389659  | 0.02303507 | 0.02320008 |
| 0.44306526 | 0.29651183 | 0.15317461 | 0.51059322 | 0.49238182 | 0.48186333 | 0.45275234 |
| 25.7175012 | 11.5280281 | 7.93287193 | 9.8292759  | 6.55563978 | 12.9641003 | 5.35631289 |
| 12.9384478 | 10.1996586 | 6.10970817 | 9.93360507 | 6.2068022  | 12.8569823 | 9.80476976 |
| 8.92614022 | 8.59634912 | 3.9854743  | 8.93012661 | 2.77105946 | 9.14740155 | 8.47883597 |
| 0.41658051 | 0.32845436 | 0.25737768 | 0.35171842 | 0.26716097 | 0.3486136  | 0.36025182 |
| 0.71619409 | 0.42023214 | 0.25459047 | 0.47387522 | 0.18470309 | 0.41265017 | 0.32526534 |
| 0.06089132 | 0.03739746 | 0.0264849  | 0.06539932 | 0.09459659 | 0.08139575 | 0.07158135 |
| 2.68445277 | 1.38262499 | 1.19627719 | 1.33673819 | 1.05078227 | 1.5757217  | 1.59278395 |
| 0.70716897 | 0.4754769  | 0.55749103 | 0.43460133 | 0.48425008 | 0.36637311 | 0.49607436 |

| Butyrate500µM | Butyrate500µM | Butyrate500µM | Butyrate500µM | TNFα       | Butyrate500µM | TNFα       | Butyrate500µM | TNFα     |
|---------------|---------------|---------------|---------------|------------|---------------|------------|---------------|----------|
| B5            | B6            | B7            | B8            | C1         | C2            | C3         |               |          |
| 500µM Butyr   | 500µM Butyr   | 500µM Butyr   | 500µM Butyr   | Combined   | 50            | Combined   | 50            | Combined |
| 44032         | 44032         | 44032         | 44032         | 44032      | 44032         | 44032      | 44032         | 44032    |
| Sp21          | Sp22          | Sp23          | Sp24          | Sp25       | Sp26          | Sp27       |               |          |
| 0.03578272    | 0.80312003    | 0.28766453    | 0.02795791    | 0.03076857 | 0.01103337    | 0.02051957 |               |          |
| 0.06027562    | 0.06034765    | 0.07209489    | 0.01012157    | 0.03806593 | 0.01304066    | 0.12138734 |               |          |
| 0.11339779    | 0.11405137    | 0.11347189    | 0.03904309    | 0.10019786 | 0.01455375    | 0.15502189 |               |          |
| 0.10576209    | 0.10568731    | 0.07862974    | 0.04535734    | 0.15287697 | 0.17531726    | 0.23180368 |               |          |
| 0.14418868    | 0.15963258    | 0.14170543    | 0.04337158    | 0.1251254  | 0.03815795    | 0.20014611 |               |          |
| 0.03187989    | 0.03266262    | 0.0320614     | 0.02264351    | 0.03446522 | 0.04112146    | 0.08020637 |               |          |
| 0.03204255    | 0.02454501    | 0.02550221    | 0.0097553     | 0.02280585 | 0.01669727    | 0.05037175 |               |          |
| 0.01428282    | 0.01828715    | 0.01660985    | 0.00369687    | 0.01219871 | 0.0007239     | 0.01534266 |               |          |
| 0.20184655    | 0.20319244    | 0.19460549    | 0.08815841    | 0.26743798 | 0.13583382    | 0.42984382 |               |          |
| 0.08559217    | 0.09626205    | 0.08057527    | 0.05781456    | 0.07057354 | 0.03479815    | 0.10020007 |               |          |
| 0.44060334    | 0.57707929    | 0.74801027    | 0.13292774    | 0.50400791 | 0.13540864    | 0.84577326 |               |          |
| 0.01252638    | 0.01254124    | 0.00871391    | 0.01040686    | 0.0277809  | 0.04888367    | 0.04719692 |               |          |
| 0.11853444    | 0.15693672    | 0.13266403    | 0.03593682    | 0.14128473 | 0.02438015    | 0.14948294 |               |          |
| 2.31950232    | 1.902001      | 3.6471167     | 1.62601927    | 1.89236558 | 5.01271196    | 2.59861378 |               |          |
| 0.4465518     | 0.42670725    | 0.27179212    | 0.1354561     | 0.34368752 | 0.23533051    | 0.40774834 |               |          |
| 0.19090927    | 0.22637009    | 0.15109188    | 0.14846927    | 0.24578923 | 0.31721177    | 0.16673824 |               |          |
| 0.05353359    | 0.04237001    | 0.03499261    | 0.01041669    | 0.09512216 | 0.01210291    | 0.04677021 |               |          |
| 0.04689842    | 0.05884452    | 0.03729254    | 0.03342576    | 0.03758849 | 0.0548501     | 0.10792802 |               |          |
| 0.02595217    | 0.02176107    | 0.01693358    | 0.0166027     | 0.05316265 | 0.06209317    | 0.05158366 |               |          |
| 0.20730252    | 0.21024291    | 0.22279812    | 0.06233297    | 0.18750811 | 0.08384165    | 0.40535886 |               |          |
| 0.03487461    | 0.02899814    | 0.02127275    | 0.01667833    | 0.03608315 | 0.01663573    | 0.04040515 |               |          |
| 0.21747476    | 0.18407802    | 0.17044798    | 0.0670928     | 0.25419066 | 0.14439344    | 0.36894278 |               |          |
| 0.01083587    | 0.00995077    | 0.01050687    | 0.0025808     | 0.00996619 | 0.0043216     | 0.02163426 |               |          |
| 0.02831342    | 0.05208944    | 0.03005447    | 0.01890879    | 0.02620363 | 0.01769868    | 0.0541541  |               |          |
| 0.02504438    | 0.0304927     | 0.02872093    | 0.00978489    | 0.02330179 | 0.01718815    | 0.08708758 |               |          |
| 0.13938516    | 0.10706374    | 0.06357576    | 0.02835109    | 0.09521391 | 0.06028325    | 0.10681016 |               |          |
| 0.09878098    | 0.10013533    | 0.08502398    | 0.04610136    | 0.10117374 | 0.05046541    | 0.1219035  |               |          |
| 0.02607457    | 0.03280948    | 0.02991867    | 0.02558531    | 0.10852753 | 0.05746544    | 0.12358025 |               |          |
| 0.0088138     | 0.00885264    | 0.01119666    | 0.00368296    | 0.00897395 | 0.00677464    | 0.00288241 |               |          |
| 0.03724234    | 0.05229238    | 0.05237914    | 0.02637172    | 0.05490965 | 0.03088247    | 0.06484833 |               |          |
| 0.02409543    | 0.02133182    | 0.02058646    | 0.00968118    | 0.02234145 | 0.01212259    | 0.05114334 |               |          |
| 0.00751506    | 0.01235074    | 0.012867      | 0.00799432    | 0.0271385  | 0.02298654    | 0.03954192 |               |          |
| 2.30424374    | 1.28040259    | 2.35714438    | 0.75742285    | 2.14493298 | 0.64839426    | 4.22702379 |               |          |
| 1.38163872    | 1.28884766    | 1.21273058    | 0.0664986     | 1.25545483 | 1.34675417    | 0.82156983 |               |          |
| 0.02257481    | 0.01716467    | 0.01870056    | 0.00883923    | 0.01993684 | 0.08265245    | 0.03729203 |               |          |
| 0.93656982    | 1.04530272    | 1.01374713    | 0.23816211    | 0.97887783 | 0.51864709    | 1.82846017 |               |          |
| 0.10818445    | 0.1105158     | 0.10959246    | 0.10367286    | 0.13426237 | 0.25434386    | 0.22351741 |               |          |
| 0.01540833    | 0.01626892    | 0.01596452    | 0.01018292    | 0.00747423 | 0.01391786    | 0.03223668 |               |          |

|            |            |            |            |            |            |            |
|------------|------------|------------|------------|------------|------------|------------|
| 0.32849763 | 0.40360696 | 0.43683808 | 0.29972949 | 0.41401625 | 0.57679092 | 0.77229459 |
| 145.68094  | 136.06706  | 140.400364 | 55.8705017 | 177.226089 | 136.901626 | 323.707208 |
| 0.00032088 | 0.00537505 | 0.00026333 | 0.00022604 | 0.03751297 | 0.00038454 | 0.00061134 |
| 0.45350047 | 0.48056113 | 0.4054273  | 0.11745514 | 0.39825666 | 0.22425466 | 0.94492273 |
| 0.0299992  | 0.02970435 | 0.02480793 | 0.01215669 | 0.03133097 | 0.01922136 | 0.04826739 |
| 0.01354368 | 0.02401122 | 0.042314   | 0.01672985 | 0.01931618 | 0.03945219 | 0.13700158 |
| 0.01874334 | 0.05546572 | 0.01202009 | 0.01086902 | 0.01763529 | 0.00070231 | 0.00155148 |
| 0.10633862 | 0.09431167 | 0.08065695 | 0.03775576 | 1.10670341 | 0.04539673 | 0.14684255 |
| 0.04768735 | 0.0537749  | 0.05138782 | 0.0116442  | 0.03163626 | 0.01107327 | 0.05951425 |
| 0.09459074 | 0.07985731 | 0.08575959 | 0.09418328 | 0.16514932 | 0.13951914 | 0.21163253 |
| 0.01540779 | 0.0085772  | 0.00799398 | 0.01317509 | 0.00382217 | 0.01141457 | 0.00737105 |
| 0.25318782 | 0.2386036  | 0.24450786 | 0.25073566 | 0.19118078 | 0.11843694 | 0.2553459  |
| 0.52291535 | 0.67305638 | 0.63221347 | 0.17128063 | 0.56941831 | 0.19448888 | 1.22593257 |
| 0.3398162  | 0.39027319 | 0.32640391 | 0.13346813 | 0.28909485 | 0.18152588 | 0.66827307 |
| 0.43991963 | 0.44563786 | 0.44459504 | 0.23745121 | 0.38700647 | 0.33192669 | 0.9508122  |
| 6.35891299 | 5.8420434  | 5.23328472 | 3.28858337 | 5.56740727 | 4.77238471 | 7.7698141  |
| 0.14274936 | 0.30316966 | 0.17345803 | 0.09107374 | 0.16314678 | 0.18166099 | 0.2564477  |
| 0.00114823 | 0.00202837 | 0.00113418 | 0.00061528 | 0.03959102 | 0.00152127 | 0.00252973 |
| 0.01468505 | 0.01536638 | 0.01391492 | 0.00551569 | 0.01286509 | 0.0074064  | 0.02787534 |
| 0.27916395 | 0.35299204 | 0.4067545  | 0.15641605 | 0.31633758 | 0.20823999 | 0.58525374 |
| 0.42877308 | 0.55213101 | 0.46856904 | 0.07977427 | 0.33894861 | 0.223352   | 1.0312744  |
| 0.17896032 | 0.19463569 | 0.16054172 | 0.05621484 | 0.23172182 | 0.1195759  | 0.51774646 |
| 0.03809064 | 0.04454517 | 0.0590643  | 0.05054602 | 0.06949242 | 0.06194963 | 0.11261998 |
| 0.90651793 | 0.52837139 | 0.96920105 | 0.61736594 | 2.62561175 | 1.48374804 | 5.44701447 |
| 1.11047375 | 1.05606612 | 0.86082871 | 0.22536508 | 0.99213039 | 0.44154641 | 1.53240752 |
| 3.26309443 | 2.74319408 | 2.9978141  | 1.70556163 | 2.81057686 | 3.60330025 | 4.01162298 |
| 42.2432651 | 43.04217   | 39.1398947 | 16.7217643 | 35.9411004 | 20.0269552 | 76.0877858 |
| 4.16542613 | 4.50794192 | 2.72069909 | 0.9187677  | 2.32036688 | 1.70518128 | 5.97045396 |
| 0.0443799  | 0.06855725 | 0.09547985 | 0.03611857 | 0.09149299 | 0.01877148 | 0.1039277  |
| 5.80283712 | 5.23519274 | 6.55555293 | 3.27447892 | 4.60695137 | 6.61067769 | 10.2694884 |
| 0.64922337 | 0.60758671 | 0.598237   | 0.35888554 | 0.82864569 | 0.49958272 | 1.18506629 |
| 1.5756515  | 1.89146765 | 1.81637853 | 0.66854692 | 1.72447151 | 2.16907537 | 3.89601877 |
| 3.15679707 | 3.46021985 | 3.10087332 | 0.71072746 | 3.28449108 | 1.11645484 | 5.92839263 |
| 0.09979722 | 0.08867499 | 0.09404235 | 0.06195721 | 0.11083238 | 0.07186589 | 0.10195597 |
| 7.87161594 | 9.17798851 | 8.12971747 | 2.05011578 | 8.02200909 | 2.98712867 | 15.6476033 |
| 0.30191908 | 0.21247522 | 0.22268649 | 0.09255554 | 0.18318136 | 0.4269628  | 0.40883942 |
| 25.3155924 | 28.8230456 | 28.4920398 | 11.6355571 | 24.92015   | 10.884863  | 43.6527652 |
| 0.00772435 | 0.00852145 | 0.00275658 | 0.0186811  | 0.027109   | 0.03173583 | 0.02443361 |
| 0.04627174 | 0.04302427 | 0.0512713  | 0.00648185 | 0.05515108 | 0.01206135 | 0.13108086 |
| 0.02762542 | 0.05340828 | 0.01451656 | 0.02635258 | 0.04420584 | 0.00061393 | 0.00324975 |
| 0.04033621 | 0.03389996 | 0.03090927 | 0.0406255  | 0.02074159 | 0.01717916 | 0.00756617 |
| 0.00555282 | 0.01019243 | 0.00190243 | 0.01601847 | 0.00389893 | 0.00181558 | 0.005174   |
| 0.08674463 | 0.07140138 | 0.05125029 | 0.05690748 | 0.04851931 | 0.03977481 | 0.0224441  |

|            |            |            |            |            |            |            |
|------------|------------|------------|------------|------------|------------|------------|
| 0.00378261 | 0.00416447 | 0.00500661 | 0.00438677 | 0.0659453  | 0.00383758 | 0.00675481 |
| 0.02081799 | 0.02218306 | 0.01938876 | 0.00786531 | 0.02037615 | 0.00428774 | 0.03261212 |
| 0.38288068 | 0.42398873 | 0.32930616 | 0.09618037 | 0.40641497 | 0.25001511 | 0.91492522 |
| 0.00481422 | 0.00476436 | 0.00453103 | 0.00285769 | 0.00596982 | 0.00411133 | 0.00900634 |
| 3.79054026 | 2.29025345 | 0.86073433 | 0.83707408 | 9.42033492 | 0.97126754 | 7.47617692 |
| 5.89145625 | 4.82360152 | 4.73519404 | 3.35791837 | 5.7586642  | 6.46883027 | 5.57933072 |
| 0.02520463 | 0.01353018 | 0.01709438 | 0.00905551 | 0.01784679 | 0.02924873 | 0.04681935 |
| 2.35767005 | 2.52203044 | 2.43540696 | 0.89087134 | 2.38710233 | 0.39624134 | 2.59677042 |
| 7.09672412 | 8.24839665 | 8.2198499  | 4.16482809 | 5.11114911 | 3.13114468 | 14.442296  |
| 0.0168009  | 6.48718999 | 4.09199478 | 0.11896658 | 0.02351193 | 0.00742738 | 1.10860414 |
| 0.04663546 | 0.01905881 | 0.03375913 | 1.15195532 | 0.04046994 | 1.20994664 | 3.7972921  |
| 0.01805807 | 0.01559299 | 0.01078993 | 0.0008111  | 0.005108   | 0.00045402 | 0.00086592 |
| 0.00405575 | 0.08010823 | 0.07701875 | 0.01179825 | 0.00396056 | 0.00806885 | 0.17228795 |
| 0.00267785 | 0.00320656 | 0.00108874 | 0.00139512 | 0.35790873 | 0.00065338 | 0.00184175 |
| 0.03650055 | 0.02625999 | 0.03613276 | 0.01810104 | 0.03156531 | 0.06199295 | 0.06152788 |
| 0.02580366 | 0.05207143 | 0.00713414 | 0.05551123 | 0.02119106 | 0.00051022 | 0.00498777 |
| 0.01231337 | 0.01100255 | 0.01125216 | 0.00915186 | 0.01346711 | 0.01686456 | 0.02857541 |
| 2.87809254 | 3.5019616  | 3.17109716 | 0.68497184 | 1.59580066 | 0.54112515 | 6.75796899 |
| 0.28655405 | 0.2681913  | 0.19316078 | 0.18223912 | 0.30024093 | 0.3217453  | 0.261269   |
| 0.64656698 | 0.65539064 | 0.8714135  | 0.38012982 | 1.05040425 | 0.41473996 | 1.22061104 |
| 0.15559219 | 0.17680199 | 0.17371482 | 0.07188786 | 0.16962357 | 0.07937533 | 0.19668578 |
| 0.64045263 | 0.61145272 | 0.66139131 | 0.19097554 | 0.80721651 | 0.53996932 | 1.13579628 |
| 0.17618992 | 0.19076605 | 0.20411039 | 0.12908854 | 0.15901598 | 0.42677021 | 0.60460258 |
| 0.19224831 | 0.24763239 | 0.23716152 | 0.17968699 | 0.23111182 | 0.08980969 | 0.31844684 |
| 1.08230813 | 1.14320084 | 1.0666536  | 0.25650158 | 1.00840953 | 0.32920293 | 2.04191862 |
| 0.00891959 | 0.0114876  | 0.00518954 | 0.00301367 | 0.00466205 | 0.00731551 | 0.01344042 |
| 69.2044951 | 89.0845572 | 68.5658724 | 20.7570002 | 63.8033943 | 25.2157504 | 121.141561 |
| 0.1163923  | 0.13899657 | 0.19567748 | 0.04636486 | 0.28224997 | 0.12576053 | 0.80559867 |
| 0.0749742  | 0.07306472 | 0.00164458 | 0.55322222 | 0.85406518 | 0.01203048 | 0.1310558  |
| 31.8347894 | 38.1447503 | 30.5844878 | 10.7527948 | 31.543592  | 7.22740791 | 59.9835831 |
| 0.1950109  | 0.18792259 | 0.22749099 | 0.23422584 | 0.23068382 | 0.37765818 | 0.37024114 |
| 0.93335781 | 1.17899801 | 1.01899066 | 0.34934522 | 1.15948474 | 0.09657618 | 0.95671759 |
| 45.8077731 | 51.0075413 | 1.31127325 | 14.2916411 | 74.6346735 | 0.36935224 | 94.5316945 |
| 0.28235442 | 0.12573873 | 0.12632465 | 0.09270613 | 0.1762894  | 0.14164594 | 0.21954594 |
| 0.03791513 | 0.0392768  | 0.04291074 | 0.00291342 | 0.02431913 | 0.00099006 | 0.0441323  |
| 1.90270857 | 2.11596254 | 1.83578412 | 0.37206212 | 2.64799684 | 1.32202952 | 10.5364077 |
| 0.00592206 | 0.11434419 | 0.00450082 | 0.00275441 | 0.00477044 | 0.00238723 | 0.00629002 |
| 0.03070568 | 0.03354576 | 0.03262042 | 0.01557124 | 0.03383074 | 0.01826983 | 0.05270238 |
| 12.8030254 | 15.9764601 | 14.9672514 | 4.28667556 | 12.9500456 | 3.0757022  | 20.9511801 |
| 1.47437526 | 1.7275324  | 1.51349674 | 0.28891467 | 1.567267   | 0.65319402 | 4.18007395 |
| 19.0877658 | 22.0742359 | 21.851107  | 8.49138034 | 21.8429948 | 7.21228504 | 27.3274289 |
| 17.304112  | 17.30066   | 14.451596  | 5.04144817 | 18.2315979 | 10.6346497 | 43.1603649 |
| 0.18715229 | 0.22102487 | 0.19347542 | 0.09477196 | 0.22884937 | 0.09305314 | 0.31158824 |

|            |            |            |            |            |            |             |
|------------|------------|------------|------------|------------|------------|-------------|
| 18.1378197 | 20.9004972 | 22.6535976 | 11.3580426 | 25.8324251 | 11.6420951 | 30.0706351  |
| 0.00965926 | 0.01174437 | 0.01149817 | 0.00303759 | 0.01190197 | 0.00270849 | 0.01344078  |
| 1.213837   | 1.35981312 | 1.14745179 | 0.3072594  | 0.93695999 | 0.28927908 | 1.86092827  |
| 42.3687996 | 46.1227196 | 57.52968   | 15.3562103 | 56.1163347 | 15.7606394 | 74.9192076  |
| 0.17397702 | 0.2126561  | 0.16378075 | 0.07421175 | 0.17593393 | 0.10277691 | 0.16935753  |
| 0.04411732 | 0.04144529 | 0.0446954  | 0.02366001 | 0.04159555 | 0.01255474 | 0.03722114  |
| 0.04607548 | 0.02917725 | 0.03247978 | 0.00917053 | 0.04195518 | 0.0172488  | 0.09944975  |
| 0.27529071 | 0.38282172 | 0.43853133 | 0.05973289 | 0.49043458 | 0.28076535 | 2.05250533  |
| 0.03154611 | 0.02963625 | 0.02872296 | 0.01094785 | 0.02460444 | 0.00900234 | 0.04948598  |
| 0.08336886 | 0.11154179 | 0.03895155 | 0.22569458 | 0.14585026 | 0.01825528 | 0.04396296  |
| 1.96227224 | 1.8438937  | 1.5947541  | 1.33883715 | 1.22089196 | 1.8547222  | 2.13361392  |
| 0.04259096 | 0.05984659 | 0.02160398 | 0.02456458 | 0.02166651 | 0.01248051 | 0.0277224   |
| 0.05728007 | 0.05432754 | 0.09289242 | 0.06606936 | 0.17215126 | 0.07141051 | 0.14140935  |
| 0.00826199 | 0.00525025 | 0.00139354 | 0.01736877 | 0.00113721 | 0.00093071 | 0.00189489  |
| 0.05751467 | 0.0562795  | 0.05424164 | 0.04341807 | 0.07069572 | 0.05362538 | 0.11204047  |
| 0.0553082  | 0.0440935  | 0.04736337 | 0.02312487 | 0.07584414 | 0.04019487 | 0.111104276 |
| 0.00707043 | 0.11206207 | 0.00306199 | 0.00134548 | 0.00424338 | 0.00221295 | 0.01543255  |
| 0.02133489 | 0.02355618 | 0.0209053  | 0.01176454 | 0.02057791 | 0.01007399 | 0.03789983  |
| 0.20733912 | 0.17064946 | 0.22473772 | 0.04539228 | 0.21425912 | 0.09093922 | 0.39259317  |
| 34.0933615 | 33.8073682 | 29.3968289 | 7.08384782 | 26.6650506 | 7.18459035 | 46.3736908  |
| 0.26855867 | 0.25600233 | 0.28941757 | 0.10183384 | 0.28244203 | 0.16842328 | 0.87731092  |
| 0.01952188 | 0.02881303 | 0.02929316 | 0.0178244  | 0.03172439 | 0.02557316 | 0.02900974  |
| 1.14595938 | 0.99712489 | 0.85250165 | 0.86337618 | 1.10125466 | 1.96532912 | 2.33140634  |
| 0.0574895  | 0.05926643 | 0.09163746 | 0.05082755 | 0.06658668 | 0.03525534 | 0.07682773  |
| 0.14355888 | 0.23036694 | 0.25952586 | 0.19033753 | 0.14354701 | 0.23257545 | 0.34452218  |
| 0.05187295 | 0.0504472  | 0.05406118 | 0.0178651  | 0.05209389 | 0.02698686 | 0.10535732  |
| 0.96365668 | 0.99633665 | 1.11593652 | 0.59877855 | 1.3214473  | 1.27093857 | 2.2887749   |
| 1.73757523 | 1.57490429 | 1.93545283 | 0.65652104 | 1.52618253 | 0.60328128 | 2.24218646  |
| 5.70526945 | 0.91132198 | 1.39543235 | 0.01714492 | 0.18293568 | 1.56304855 | 0.1625572   |
| 0.21553287 | 0.31117768 | 0.26748988 | 0.37734079 | 0.2381249  | 0.67052709 | 0.30215486  |
| 0.016612   | 0.01601357 | 0.01235912 | 0.00576618 | 0.01474891 | 0.00387495 | 0.02442387  |
| 0.00028658 | 0.00044391 | 0.0003477  | 0.00482308 | 0.04629685 | 0.05518194 | 0.08514474  |
| 0.01772787 | 0.02073586 | 0.01951082 | 0.00682775 | 0.0182567  | 0.00921798 | 0.02195251  |
| 0.09477826 | 0.00106078 | 0.1528202  | 0.04961873 | 0.08279358 | 0.07925613 | 0.23676484  |
| 0.03254577 | 0.0201313  | 0.01218576 | 0.00696023 | 0.0114063  | 0.01630049 | 0.01515519  |
| 0.05772627 | 0.01962483 | 0.01626576 | 0.04304393 | 0.02102053 | 0.01552528 | 0.11947528  |
| 0.33577494 | 0.34127873 | 0.51694065 | 0.13321966 | 0.44644773 | 0.19424103 | 0.87754136  |
| 0.04923736 | 0.03827318 | 0.01787635 | 0.00100854 | 0.03926418 | 0.00089703 | 0.00575367  |
| 0.02140919 | 0.01740615 | 0.02243245 | 0.00570122 | 0.00372703 | 0.0089668  | 0.01424088  |
| 0.00310358 | 0.00423763 | 0.00026603 | 0.00017328 | 0.00027014 | 0.00033973 | 0.00064455  |
| 0.07334927 | 0.08430896 | 0.0759526  | 0.07538044 | 0.09757619 | 0.04428221 | 0.07391103  |
| 2.15087598 | 2.50950666 | 2.26826379 | 1.98175825 | 2.93913892 | 2.09594514 | 2.30994159  |
| 0.0664119  | 0.06926197 | 0.06917694 | 0.09940487 | 0.07389388 | 0.04890357 | 0.04466175  |

|            |            |            |            |            |            |            |
|------------|------------|------------|------------|------------|------------|------------|
| 1.49601026 | 2.4424875  | 0.43795477 | 0.96390949 | 0.71771911 | 0.10707409 | 0.27207078 |
| 0.01365607 | 0.01419993 | 0.01301143 | 0.00663954 | 0.01015579 | 0.00601091 | 0.0205296  |
| 0.02511193 | 0.03247041 | 0.01287575 | 0.05358838 | 0.05414992 | 0.00844313 | 0.01693572 |
| 0.06529969 | 0.07400471 | 0.06410219 | 0.0544783  | 0.0552312  | 0.03575955 | 0.06408844 |
| 0.70788466 | 0.81195435 | 0.68465218 | 0.14078275 | 0.83970423 | 0.2722306  | 1.72931926 |
| 0.02989683 | 0.02868174 | 0.03323294 | 0.01259434 | 0.02637136 | 0.00438691 | 0.02648221 |
| 0.59138809 | 0.680317   | 0.62982042 | 0.14777169 | 0.43117986 | 0.10810472 | 1.0379101  |
| 0.04383785 | 0.04758042 | 0.03814916 | 0.02909286 | 0.02645158 | 0.01887981 | 0.03287324 |
| 0.02686794 | 0.03525638 | 0.03263534 | 0.01954074 | 0.02219682 | 0.0036077  | 0.02111822 |
| 0.38986527 | 0.37829847 | 0.36914004 | 0.46743544 | 0.73518189 | 0.42620603 | 0.39632457 |
| 12.2537647 | 14.3568142 | 11.0981006 | 3.00897744 | 11.5246632 | 4.35248814 | 21.7449388 |
| 9.30567099 | 11.0057724 | 10.2027035 | 3.57558396 | 9.46938116 | 3.2009448  | 18.3630529 |
| 6.14335841 | 7.46536526 | 8.35158549 | 1.53301435 | 12.3039496 | 1.64463736 | 19.8280867 |
| 0.31831424 | 0.34235265 | 0.33448759 | 0.18693095 | 0.38302708 | 0.16211556 | 0.51857972 |
| 0.42056987 | 0.55494579 | 0.42855127 | 0.16128894 | 0.29622757 | 0.15112722 | 0.48860305 |
| 0.05386674 | 0.05671056 | 0.04546616 | 0.03831497 | 0.06989772 | 0.10126816 | 0.07576514 |
| 1.41334546 | 1.63744946 | 1.42302631 | 0.91149249 | 2.15663508 | 1.58656633 | 3.53959319 |
| 0.56669693 | 0.60297461 | 0.43973419 | 0.4886029  | 0.38389316 | 0.26852575 | 0.41982066 |

| TNFα        | Butyrate    | TNFα         | Butyrate    | TNFα        | Butyrate       | TNFα     | Butyrate   | TNFα | Butyrate | TNFα | Butyrate_Combined |
|-------------|-------------|--------------|-------------|-------------|----------------|----------|------------|------|----------|------|-------------------|
| C4          | C5          | C6           | C7          | C8          |                |          |            |      |          |      |                   |
| Combined 50 | Combined 50 | Combined 50  | Combined 50 | Combined 50 | Combined 500μM | Butyrate | + 500pg/mL |      |          |      |                   |
| 44032       | 44032       | 44032        | 44032       | 44032       |                |          |            |      |          |      |                   |
| Sp28        | Sp29        | Sp30         | Sp31        | Sp32        |                |          |            |      |          |      |                   |
| 0.06900911  | 0.71703582  | 0.01217769   | 0.18722349  | 0.10429956  |                |          |            |      |          |      |                   |
| 0.01611985  | 0.02947896  | 0.03840981   | 0.07399534  | 0.0364262   |                |          |            |      |          |      |                   |
| 0.04263857  | 0.04521352  | 0.06205888   | 0.11578718  | 0.02322315  |                |          |            |      |          |      |                   |
| 0.02843064  | 0.05666544  | 0.15691097   | 0.12394213  | 0.00028981  |                |          |            |      |          |      |                   |
| 0.04956278  | 0.09474569  | 0.15247017   | 0.24750986  | 0.81922554  |                |          |            |      |          |      |                   |
| 0.01419031  | 0.01637991  | 0.03620894   | 0.04486841  | 0.1365247   |                |          |            |      |          |      |                   |
| 0.00827532  | 0.01346153  | 0.03088047   | 0.02035488  | 0.07568209  |                |          |            |      |          |      |                   |
| 0.00686405  | 0.01260926  | 0.01008684   | 0.02163144  | 0.00715661  |                |          |            |      |          |      |                   |
| 0.10527618  | 0.16730756  | 0.21426815   | 0.40076736  | 6.34502882  |                |          |            |      |          |      |                   |
| 0.08198052  | 0.04455674  | 0.0428058    | 0.08858702  | 0.25347193  |                |          |            |      |          |      |                   |
| 0.15882168  | 0.25899716  | 0.31789101   | 0.57980211  | 0.49533141  |                |          |            |      |          |      |                   |
| 0.00430626  | 0.0011516   | 0.02261662   | 0.02646363  | 0.02139186  |                |          |            |      |          |      |                   |
| 0.06331577  | 0.05888135  | 0.06256535   | 0.13409523  | 0.01331182  |                |          |            |      |          |      |                   |
| 0.27540567  | 1.52835518  | 2.60450595   | 2.73236515  | 0.01296138  |                |          |            |      |          |      |                   |
| 0.16912109  | 0.24477565  | 0.27502827   | 0.39454358  | 0.07788557  |                |          |            |      |          |      |                   |
| 0.04037304  | 0.11354014  | 0.21392007   | 0.3209382   | 0.03463304  |                |          |            |      |          |      |                   |
| 0.01485197  | 0.0226243   | 0.03264488   | 0.03925268  | 7.97022551  |                |          |            |      |          |      |                   |
| 0.0174564   | 0.03217692  | 0.05385356   | 0.057863    | 0.52847076  |                |          |            |      |          |      |                   |
| 0.01145892  | 0.02032572  | 0.02453556   | 0.03506197  | 3.38606419  |                |          |            |      |          |      |                   |
| 0.11371327  | 0.12720116  | 0.21516673   | 0.33813621  | 0.00024563  |                |          |            |      |          |      |                   |
| 0.01210375  | 0.01891853  | 0.02553363   | 0.04992693  | 0.02550321  |                |          |            |      |          |      |                   |
| 0.06578756  | 0.14338087  | 0.24157206   | 0.34914217  | 0.01860072  |                |          |            |      |          |      |                   |
| 0.00343346  | 0.00692478  | 0.00806904   | 0.01649687  | 0.30762674  |                |          |            |      |          |      |                   |
| 0.0198413   | 0.02210735  | 0.03434413   | 0.04689136  | 1.07343558  |                |          |            |      |          |      |                   |
| 0.00626545  | 0.01323908  | 0.02396842   | 0.04054349  | 0.0073039   |                |          |            |      |          |      |                   |
| 0.04155838  | 0.05627095  | 0.06352345   | 0.09437115  | 9.70826078  |                |          |            |      |          |      |                   |
| 0.0502743   | 0.06161668  | 0.08320198   | 0.11333197  | 0.07338567  |                |          |            |      |          |      |                   |
| 0.0319542   | 0.03960907  | 0.03989063   | 0.05768739  | 0.00079807  |                |          |            |      |          |      |                   |
| 0.00324068  | 0.00567563  | 0.01076511   | 0.01483718  | 0.01666332  |                |          |            |      |          |      |                   |
| 0.02771621  | 0.04145737  | 0.04978092   | 0.06563234  | 0.14582357  |                |          |            |      |          |      |                   |
| 0.00954126  | 0.01110577  | 0.02121634   | 0.02488057  | 0.05034169  |                |          |            |      |          |      |                   |
| 0.00576802  | 0.00723776  | 0.02783676   | 0.03467283  | 0.01263025  |                |          |            |      |          |      |                   |
| 1.00999793  | 1.64347493  | 1.64785499   | 4.00498986  | 0.00950836  |                |          |            |      |          |      |                   |
| 1.00255176  | 1.42530099  | 1.23376275</ |             |             |                |          |            |      |          |      |                   |

|            |            |            |            |            |
|------------|------------|------------|------------|------------|
| 0.19161052 | 0.36096508 | 0.44288361 | 0.52139369 | 0.04026592 |
| 62.3368575 | 113.686031 | 138.569682 | 195.073494 | 0.84126264 |
| 9.5305E-05 | 0.00014717 | 0.01082122 | 0.00055035 | 0.00081282 |
| 0.13198102 | 0.25019169 | 0.41290364 | 0.65161742 | 0.00250524 |
| 0.00841628 | 0.01719372 | 0.02499994 | 0.04062651 | 0.00880368 |
| 0.04500894 | 0.01121327 | 0.02905521 | 0.02439408 | 0.02366632 |
| 0.00030424 | 0.00248505 | 0.00763479 | 0.00537805 | 0.18500781 |
| 0.04081246 | 0.04136819 | 0.06286547 | 0.11129059 | 0.09650431 |
| 0.01513467 | 0.03198435 | 0.03121395 | 0.05717944 | 0.1152261  |
| 0.04676589 | 0.12607188 | 0.1394833  | 0.13806075 | 0.03827583 |
| 0.00511843 | 0.00809525 | 0.00785654 | 0.00409796 | 5.17567112 |
| 0.22928976 | 0.24176248 | 0.23987451 | 0.25322128 | 10.2501759 |
| 0.2208217  | 0.28334791 | 0.6141643  | 0.84078218 | 0.9376105  |
| 0.15956526 | 0.25642118 | 0.32634608 | 0.45814421 | 0.23195021 |
| 0.34608791 | 0.50773672 | 0.53760563 | 0.81746127 | 0.00518523 |
| 4.0799228  | 5.83692545 | 5.66280117 | 8.10782421 | 2.31823865 |
| 0.03729605 | 0.08423704 | 0.17073256 | 0.19835048 | 0.11846157 |
| 0.00104266 | 0.00087921 | 0.00139107 | 0.00166503 | 0.00554104 |
| 0.00489466 | 0.00677457 | 0.01326533 | 0.02621252 | 0.00529218 |
| 0.11953371 | 0.24607113 | 0.34306258 | 0.46723361 | 11.9912047 |
| 0.01852915 | 0.14652701 | 0.4127791  | 0.65590546 | 0.05699693 |
| 0.10266505 | 0.17110968 | 0.22670611 | 0.38108718 | 0.01512214 |
| 0.0270805  | 0.04123802 | 0.05931291 | 0.04195261 | 0.02602672 |
| 1.13800774 | 1.36112362 | 1.64533535 | 2.51583737 | 0.09632244 |
| 0.21266775 | 0.38956473 | 0.67099208 | 1.23961902 | 0.03207443 |
| 3.14133979 | 4.32641829 | 2.7090014  | 3.67624196 | 15.6531748 |
| 16.2805711 | 27.9279182 | 39.924103  | 57.3560474 | 0.05725306 |
| 2.06375794 | 3.28148327 | 3.95894868 | 3.95557512 | 0.00037253 |
| 0.01593259 | 0.03001916 | 0.06563117 | 0.06482471 | 0.01642149 |
| 0.80567598 | 3.00219838 | 8.27601807 | 5.26650284 | 0.12942897 |
| 0.53682779 | 0.6424502  | 0.71921743 | 1.0634976  | 0.04220575 |
| 0.49782431 | 1.23168978 | 2.08519547 | 2.47385197 | 0.10823434 |
| 0.93344753 | 2.15001553 | 2.99784547 | 5.25261127 | 11.6666197 |
| 0.0948223  | 0.11269663 | 0.09259856 | 0.12606527 | 2.40731653 |
| 2.51757762 | 5.46471019 | 7.86806355 | 12.8045068 | 0.02256366 |
| 0.16684445 | 0.25376498 | 0.40443972 | 0.66604869 | 0.09908317 |
| 15.4460858 | 23.0404064 | 23.4984804 | 38.2790302 | 0.25125269 |
| 0.00160599 | 0.01317768 | 0.02881861 | 0.07810252 | 0.01051785 |
| 0.01857799 | 0.02932748 | 0.03350786 | 0.09268051 | 0.02924845 |
| 0.00146076 | 0.00656376 | 0.01657068 | 0.00519869 | 0.14753932 |
| 0.03225654 | 0.028885   | 0.03998218 | 0.01799186 | 0.01391057 |
| 0.00055622 | 0.00080358 | 0.00191446 | 0.00339982 | 0.01117062 |
| 0.03500869 | 0.06217079 | 0.07747668 | 0.00352667 | 0.02592    |

|            |            |            |            |            |
|------------|------------|------------|------------|------------|
| 0.00104444 | 0.00202628 | 0.00559562 | 0.00589911 | 0.04320863 |
| 0.00739943 | 0.00751434 | 0.00578701 | 0.01632368 | 0.01006368 |
| 0.10606575 | 0.23545437 | 0.3625018  | 0.53828009 | 2.35851037 |
| 0.00369977 | 0.00470973 | 0.00556935 | 0.00794249 | 0.03681295 |
| 1.43456301 | 0.67779532 | 0.86603386 | 4.16231171 | 0.05167469 |
| 8.97883246 | 9.01562761 | 8.99997534 | 11.4233499 | 0.13207617 |
| 0.00810586 | 0.0089162  | 0.02021077 | 0.03209139 | 0.00323173 |
| 1.46801184 | 1.69179153 | 1.7248563  | 2.81294667 | 0.14862383 |
| 4.58928182 | 6.04341765 | 8.07011506 | 9.1135689  | 0.02602168 |
| 0.18455243 | 5.82583225 | 2.21400499 | 1.93130401 | 5.95262678 |
| 0.01080246 | 0.03581701 | 2.17455999 | 3.34758567 | 0.01222472 |
| 0.00831736 | 0.00814553 | 0.00615776 | 0.0154668  | 0.00143285 |
| 0.01201375 | 0.17056513 | 0.14045745 | 0.13432175 | 0.10323565 |
| 0.0003979  | 0.00067776 | 0.00125826 | 0.00213236 | 0.15043422 |
| 0.01279153 | 0.01946779 | 0.03064634 | 0.03000283 | 31.3171587 |
| 0.00204955 | 0.00867794 | 0.014395   | 0.00563371 | 0.01555907 |
| 0.00536746 | 0.01095206 | 0.01248538 | 0.02133045 | 0.00055432 |
| 0.4421071  | 0.23504762 | 4.83785458 | 6.83898786 | 0.0062166  |
| 0.47879202 | 0.46285898 | 0.46606581 | 0.58426911 | 0.25538945 |
| 0.41039261 | 0.51599493 | 0.59154414 | 0.99863674 | 0.35241285 |
| 0.05911009 | 0.09594048 | 0.12522492 | 0.18790528 | 0.15917686 |
| 0.14222493 | 0.25579689 | 0.53858863 | 0.78816609 | 0.04524036 |
| 0.04568693 | 0.11382569 | 0.26134564 | 0.25697917 | 0.98882274 |
| 0.16278442 | 0.00168451 | 0.15953961 | 0.26548737 | 0.01048072 |
| 0.32210667 | 0.59871285 | 0.71585478 | 1.37301356 | 0.05117918 |
| 0.00360973 | 0.00644092 | 0.01515429 | 0.00849872 | 0.06749496 |
| 20.0550927 | 35.7754994 | 48.9143745 | 83.7057005 | 13.6406685 |
| 0.03497783 | 0.12356878 | 0.2592214  | 0.40324706 | 202.187951 |
| 0.38195221 | 0.51325847 | 0.70781557 | 0.11692805 | 0.05114376 |
| 16.5263224 | 22.4642591 | 20.0506278 | 47.330816  | 0.00661814 |
| 0.17644231 | 0.2445954  | 0.25571113 | 0.26278144 | 0.08558944 |
| 0.91702662 | 0.97994493 | 0.87940968 | 1.59473354 | 0.44968419 |
| 0.46024744 | 35.0134207 | 55.0251957 | 70.3159887 | 0.71107864 |
| 0.17596613 | 0.12511881 | 0.25159787 | 0.17897803 | 0.02140161 |
| 0.00702692 | 0.01699859 | 0.01698193 | 0.03388668 | 0.00311369 |
| 0.28552967 | 0.5956795  | 1.63855909 | 3.94189178 | 0.05803563 |
| 0.0048951  | 0.00472658 | 0.00438962 | 0.33053007 | 0.03653032 |
| 0.0187676  | 0.02726875 | 0.02729412 | 0.0528384  | 0.18501631 |
| 7.20529485 | 11.5252697 | 9.11048596 | 20.2631246 | 0.01118098 |
| 0.15642921 | 0.46707542 | 1.14946822 | 2.50134267 | 0.0039026  |
| 8.97322992 | 13.4710967 | 16.424327  | 24.5704547 | 0.01580253 |
| 8.40096753 | 11.0650229 | 14.5858231 | 24.9939605 | 0.81139359 |
| 0.12541325 | 0.20809592 | 0.17516561 | 0.34258541 | 0.04421843 |

|            |            |            |            |            |
|------------|------------|------------|------------|------------|
| 11.65967   | 16.6905356 | 15.3223488 | 28.5624691 | 0.12876133 |
| 0.00686041 | 0.00865492 | 0.0074854  | 0.01561498 | 0.01628838 |
| 0.31416323 | 0.69162087 | 0.94239542 | 1.69746926 | 0.02051575 |
| 20.7876699 | 29.6458684 | 34.3418918 | 59.5652283 | 0.53145674 |
| 0.09419233 | 0.13505678 | 0.12546275 | 0.20179938 | 0.29003187 |
| 0.02395895 | 0.03366779 | 0.02395354 | 0.04622668 | 0.0412673  |
| 0.00978043 | 0.02483254 | 0.04963155 | 0.0860985  | 0.00565466 |
| 0.01932073 | 0.07644793 | 0.30855565 | 0.52416225 | 0.7094366  |
| 0.01487152 | 0.02290223 | 0.0258342  | 0.05729965 | 0.11853648 |
| 0.01246043 | 0.03186686 | 0.08160451 | 0.02996159 | 0.03854553 |
| 0.95975804 | 1.06848878 | 1.46495219 | 2.16603905 | 0.00341198 |
| 0.00624782 | 0.01058075 | 0.02551867 | 0.02225824 | 1.24549752 |
| 0.03574895 | 0.05821977 | 0.07563367 | 0.10158153 | 0.0068192  |
| 0.03228738 | 0.02089613 | 0.0013242  | 0.00240565 | 0.03694074 |
| 0.03830643 | 0.04010858 | 0.06343663 | 0.10291485 | 0.02028535 |
| 0.02943036 | 0.03722979 | 0.05369346 | 0.10214787 | 0.11068378 |
| 0.00503203 | 0.00354954 | 0.00539107 | 0.06416131 | 0.00051446 |
| 0.01232873 | 0.01830127 | 0.01876261 | 0.03366453 | 0.00764238 |
| 0.05308236 | 0.1061476  | 0.18418971 | 0.35402562 | 3.70494519 |
| 7.95280819 | 12.7780699 | 18.7074356 | 31.7160341 | 0.92399626 |
| 0.06271317 | 0.14567509 | 0.22604418 | 0.40753578 | 0.00897503 |
| 0.02828475 | 0.02839167 | 0.01501926 | 0.02814584 | 0.04163019 |
| 0.70164517 | 0.90729816 | 1.15981255 | 1.54399685 | 3.49322114 |
| 0.0725513  | 0.05784633 | 0.04128907 | 0.0712439  | 0.00668056 |
| 0.07019404 | 0.12152943 | 0.25111904 | 0.19682642 | 0.27748114 |
| 0.01410932 | 0.02266475 | 0.04547142 | 0.0611327  | 0.00373641 |
| 0.42940719 | 0.59735213 | 0.97705423 | 1.40708037 | 1.40386609 |
| 0.66962479 | 1.1197335  | 1.53898293 | 1.36672791 | 1.43324354 |
| 0.04517373 | 0.01516526 | 0.77210512 | 1.59743836 | 0.29310304 |
| 0.26427165 | 0.36162542 | 0.28612162 | 0.41537628 | 0.0460925  |
| 0.00818606 | 0.00972218 | 0.01496373 | 0.0194402  | 0.00959707 |
| 0.01422444 | 0.04642127 | 0.00688285 | 0.00448089 | 0.93145474 |
| 0.0053778  | 0.00623868 | 0.00862767 | 0.01600812 | 5.0059261  |
| 0.06061416 | 0.00089564 | 0.09865798 | 0.00132028 | 0.00914341 |
| 0.0037451  | 0.00508883 | 0.00859342 | 0.00345805 | 3.82461291 |
| 0.04477269 | 0.07587886 | 0.0755083  | 0.07165128 | 0.00449797 |
| 0.24111193 | 0.42283924 | 0.44448861 | 0.71079016 | 0.05819087 |
| 0.00470829 | 0.05313372 | 0.01630689 | 0.04349399 | 0.02471532 |
| 0.0035618  | 0.00503221 | 0.00880172 | 0.01147437 | 0.03125938 |
| 0.00171931 | 0.00045579 | 0.00047957 | 0.03116101 | 0.03429681 |
| 0.12703898 | 0.09986597 | 0.06983032 | 0.09214831 | 0.02001308 |
| 1.92004527 | 4.41008018 | 2.39840749 | 2.89384494 | 1.08120632 |
| 0.27719085 | 0.18017376 | 0.0549944  | 0.05934165 | 0.40735661 |

|            |            |            |            |            |
|------------|------------|------------|------------|------------|
| 0.07638395 | 0.24680879 | 0.4268371  | 0.24300804 | 0.00339459 |
| 0.00703134 | 0.00964288 | 0.01273129 | 0.01802232 | 0.7036546  |
| 0.00506525 | 0.01241374 | 0.03058934 | 0.01112942 | 0.00304911 |
| 0.06210392 | 0.0003254  | 0.04084076 | 0.05199349 | 4.98367485 |
| 0.23043092 | 0.44500396 | 0.63420331 | 1.05621953 | 0.00592128 |
| 0.01737181 | 0.01511231 | 0.00814003 | 0.01971624 | 0.26933799 |
| 0.18294376 | 0.28694564 | 0.49578282 | 0.58487928 | 0.04333161 |
| 0.00085813 | 0.03126328 | 0.01839456 | 0.03391319 | 0.0030178  |
| 0.03128959 | 0.02582236 | 0.00892061 | 0.01899858 | 0.24593127 |
| 0.82411252 | 0.84364847 | 0.472014   | 0.39319115 | 0.54367064 |
| 3.65810284 | 7.37821918 | 12.4706273 | 18.7813262 | 0.00508804 |
| 4.51789586 | 7.04888038 | 7.72423248 | 13.7624577 | 0.03150482 |
| 2.22631889 | 5.15753594 | 4.47592929 | 7.33799423 | 0.2891975  |
| 0.21146187 | 0.23147458 | 0.29906976 | 0.48590419 | 0.08284005 |
| 0.11624002 | 0.25238399 | 0.39683528 | 0.43890656 | 0.11926399 |
| 0.04835664 | 0.02920734 | 0.03303259 | 0.04623933 | 0.06477369 |
| 1.2226168  | 1.48287913 | 1.7023364  | 2.44894889 | 0.01246282 |
| 0.4735852  | 0.55969908 | 0.51036684 | 0.42780757 | 0.04315302 |

TNF $\alpha$  #8

| Name         | SRM1950_ | SRM1950_ | SRM1950_ Ave | SD    | %CV  |       | Median CV |
|--------------|----------|----------|--------------|-------|------|-------|-----------|
|              |          |          |              |       |      |       |           |
| (+/-)13-HO   | 0.010    | 0.007    | 0.021        | 0.01  | 0.01 | 57.42 | Median CV |
| (1R,9S)-11-  | 0.001    | 0.001    | 0.001        | 0.00  | 0.00 | 8.93  |           |
| (4-Fluorop   | 0.000    | 0.000    | 0.001        | 0.00  | 0.00 | 38.86 |           |
| [(3S)-3-(1H  | 0.001    | 0.001    | 0.001        | 0.00  | 0.00 | 12.27 |           |
| [1-(4-fluor  | 0.000    | 0.000    | 0.000        | 0.00  | 0.00 | 8.19  |           |
| 1-(4-chlor   | 0.002    | 0.002    | 0.002        | 0.00  | 0.00 | 7.02  |           |
| 1-(4-Fluor   | 0.000    | 0.000    | 0.000        | 0.00  | 0.00 | 17.54 |           |
| 1-allyl-4,5- | 0.000    | 0.000    | 0.000        | 0.00  | 0.00 | 9.92  |           |
| 1,5-diphen   | 0.001    | 0.001    | 0.001        | 0.00  | 0.00 | 9.16  |           |
| 2-(2-aminc   | 0.029    | 0.030    | 0.026        | 0.03  | 0.00 | 5.98  |           |
| 2-(Acetyl    | 0.176    | 0.125    | 0.169        | 0.16  | 0.03 | 17.64 |           |
| 2-[(3S)-1-(  | 0.000    | 0.000    | 0.000        | 0.00  | 0.00 | 8.61  |           |
| 2-[(3S)-1-(  | 0.000    | 0.000    | 0.000        | 0.00  | 0.00 | 12.52 |           |
| 2-Amino-N    | 0.182    | 0.080    | 0.182        | 0.15  | 0.06 | 39.97 |           |
| 2-Furoic ac  | 0.447    | 0.413    | 0.428        | 0.43  | 0.02 | 4.01  |           |
| 2-Naphtha    | 1.971    | 1.870    | 1.936        | 1.93  | 0.05 | 2.65  |           |
| 2,3,4,9-Tet  | 0.000    | 0.000    | 0.000        | 0.00  | 0.00 | 11.42 |           |
| 2,4-Dimet    | 0.002    | 0.002    | 0.002        | 0.00  | 0.00 | 14.33 |           |
| 2,5-Dimet    | 0.001    | 0.001    | 0.001        | 0.00  | 0.00 | 15.23 |           |
| 3-(2-fluor   | 0.019    | 0.019    | 0.019        | 0.02  | 0.00 | 1.43  |           |
| 3-(allylsulf | 0.000    | 0.000    | 0.000        | 0.00  | 0.00 | 15.60 |           |
| 3-(benzylt   | 0.001    | 0.000    | 0.000        | 0.00  | 0.00 | 4.52  |           |
| 3-[4-(tert-t | 0.001    | 0.001    | 0.001        | 0.00  | 0.00 | 12.35 |           |
| 3-amino-2-   | 0.002    | 0.002    | 0.002        | 0.00  | 0.00 | 12.35 |           |
| 3-Hydroxy-   | 0.034    | 0.034    | 0.026        | 0.03  | 0.00 | 13.95 |           |
| 3-Hydroxy-   | 0.080    | 0.076    | 0.077        | 0.08  | 0.00 | 2.52  |           |
| 3-Phenyl-2   | 0.001    | 0.001    | 0.001        | 0.00  | 0.00 | 17.10 |           |
| 3,5-Dimet    | 0.023    | 0.022    | 0.023        | 0.02  | 0.00 | 3.46  |           |
| 4-(2-meth    | 0.001    | 0.001    | 0.001        | 0.00  | 0.00 | 11.48 |           |
| 4-(4-meth    | 0.002    | 0.001    | 0.001        | 0.00  | 0.00 | 26.81 |           |
| 4-[2-(2-Thi  | 0.000    | 0.000    | 0.000        | 0.00  | 0.00 | 9.98  |           |
| 4-[(3S)-3-(  | 0.000    | 0.000    | 0.000        | 0.00  | 0.00 | 4.10  |           |
| 4-Hydroxyl   | 1.416    | 1.682    | 1.645        | 1.58  | 0.14 | 9.11  |           |
| 4-Methoxy    | 0.004    | 0.003    | 0.016        | 0.01  | 0.01 | 89.01 |           |
| 4-methyl-6   | 0.009    | 0.024    | 0.013        | 0.02  | 0.01 | 52.18 |           |
| 4-Methylp    | 0.469    | 0.384    | 0.422        | 0.43  | 0.04 | 10.09 |           |
| 4-Morphol    | 0.001    | 0.001    | 0.001        | 0.00  | 0.00 | 15.03 |           |
| 4-morphol    | 0.005    | 0.005    | 0.005        | 0.00  | 0.00 | 5.35  |           |
| 4-Nitrophe   | 0.291    | 0.219    | 0.228        | 0.25  | 0.04 | 15.84 |           |
| 4-Oxoprol    | 31.083   | 25.994   | 31.925       | 29.67 | 3.21 | 10.82 |           |
| 4,4'-Bis(die | 0.000    | 0.000    | 0.000        | 0.00  | 0.00 | 6.96  |           |
| 5-(2-Chlor   | 0.001    | 0.001    | 0.001        | 0.00  | 0.00 | 9.49  |           |

|                   |                 |                 |                 |             |             |             |
|-------------------|-----------------|-----------------|-----------------|-------------|-------------|-------------|
| 5-Fluoro TI       | 0.004           | 0.002           | 0.002           | 0.00        | 0.00        | 39.24       |
| 5-Hydroxyl        | 0.022           | 0.003           | 0.009           | 0.01        | 0.01        | 86.53       |
| 5(Z),8(Z),1:      | 0.001           | 0.001           | 0.001           | 0.00        | 0.00        | 18.50       |
| 6-Methyl-2        | 0.009           | 0.008           | 0.006           | 0.01        | 0.00        | 17.43       |
| 7-Methylgl        | 0.059           | 0.069           | 0.066           | 0.06        | 0.01        | 8.27        |
| 8-iso Prost       | 0.009           | 0.011           | 0.003           | 0.01        | 0.00        | 50.59       |
| 8,8-dimetr        | 0.003           | 0.001           | 0.002           | 0.00        | 0.00        | 39.59       |
| 9-Phenant         | 0.012           | 0.011           | 0.011           | 0.01        | 0.00        | 6.21        |
| Acetyl-L-ca       | 8.778           | 7.707           | 7.714           | 8.07        | 0.62        | 7.64        |
| Acetylchol        | 1.266           | 1.086           | 1.125           | 1.16        | 0.09        | 8.16        |
| Adenine           | 0.003           | 0.003           | 0.003           | 0.00        | 0.00        | 2.41        |
| Adenosine         | 0.003           | 0.002           | 0.002           | 0.00        | 0.00        | 25.03       |
| Adipic acid       | 0.213           | 0.185           | 0.152           | 0.18        | 0.03        | 16.70       |
| Aniline           | 0.001           | 0.001           | 0.001           | 0.00        | 0.00        | 3.20        |
| Benperido         | 0.000           | 0.000           | 0.000           | 0.00        | 0.00        | 13.80       |
| Benzoic ac        | 0.527           | 0.388           | 0.345           | 0.42        | 0.09        | 22.60       |
| Betaine           | 11.908          | 11.791          | 12.564          | 12.09       | 0.42        | 3.45        |
| <b>Bioppterin</b> | <b>0.000986</b> | <b>0.000874</b> | <b>0.000818</b> | <b>0.00</b> | <b>0.00</b> | <b>9.59</b> |
| Bis(4-ethyl       | 0.001           | 0.001           | 0.001           | 0.00        | 0.00        | 17.53       |
| Chlormequ         | 2.014           | 1.489           | 2.122           | 1.87        | 0.34        | 18.04       |
| Choline           | 0.246           | 0.233           | 0.231           | 0.24        | 0.01        | 3.40        |
| Citric acid       | 4.622           | 4.237           | 5.135           | 4.66        | 0.45        | 9.66        |
| Creatine          | 22.432          | 19.692          | 20.470          | 20.86       | 1.41        | 6.77        |
| Creatinine        | 14.527          | 12.826          | 13.499          | 13.62       | 0.86        | 6.29        |
| Cyprohept         | 0.001           | 0.000           | 0.000           | 0.00        | 0.00        | 72.28       |
| Cystathion        | 0.009           | 0.008           | 0.008           | 0.01        | 0.00        | 6.23        |
| Cysteinylgl       | 0.002           | 0.001           | 0.002           | 0.00        | 0.00        | 6.05        |
| Cytarabine        | 0.098           | 0.090           | 0.086           | 0.09        | 0.01        | 6.85        |
| Cytidine          | 0.004           | 0.002           | 0.003           | 0.00        | 0.00        | 32.88       |
| Cytidine 5'       | 0.001           | 0.001           | 0.001           | 0.00        | 0.00        | 7.85        |
| Cytosine          | 0.052           | 0.043           | 0.049           | 0.05        | 0.00        | 9.08        |
| D-(+)-Malic       | 0.056           | 0.036           | 0.039           | 0.04        | 0.01        | 24.49       |
| D-(+)-Prolin      | 11.105          | 10.975          | 11.448          | 11.18       | 0.24        | 2.18        |
| D-Panthen         | 0.012           | 0.003           | 0.007           | 0.01        | 0.00        | 61.72       |
| D-Serine          | 0.016           | 0.014           | 0.013           | 0.01        | 0.00        | 11.56       |
| delta8-THC        | 0.002           | 0.002           | 0.002           | 0.00        | 0.00        | 17.01       |
| Desmethyl         | 0.000           | 0.000           | 0.000           | 0.00        | 0.00        | 6.40        |
| Di(2-ethyl        | 0.029           | 0.006           | 0.014           | 0.02        | 0.01        | 70.96       |
| Didemethy         | 0.000           | 0.000           | 0.000           | 0.00        | 0.00        | 6.79        |
| Diphenylar        | 0.001           | 0.002           | 0.001           | 0.00        | 0.00        | 26.98       |
| Disperse b        | 0.000           | 0.000           | 0.001           | 0.00        | 0.00        | 34.68       |
| DL-Alanine        | 0.358           | 0.271           | 0.292           | 0.31        | 0.05        | 14.71       |
| DL-Arginin        | 0.009           | 0.007           | 0.007           | 0.01        | 0.00        | 11.10       |

|                    |        |        |         |       |        |        |
|--------------------|--------|--------|---------|-------|--------|--------|
| DL-Lactic A        | 3.228  | 11.386 | 16.398  | 10.34 | 6.65   | 64.30  |
| DL-Malic a         | 1.214  | 1.055  | 1.218   | 1.16  | 0.09   | 8.02   |
| DL-Serine          | 0.000  | 0.000  | 0.000   | 0.00  | 0.00   | 9.12   |
| DL-Tryptop         | 0.006  | 0.044  | 0.037   | 0.03  | 0.02   | 69.64  |
| DL- $\beta$ -Leuci | 5.568  | 5.424  | 5.553   | 5.51  | 0.08   | 1.43   |
| Docosatrie         | 0.006  | 0.007  | 0.010   | 0.01  | 0.00   | 31.02  |
| Dodecyl su         | 0.972  | 0.070  | 0.051   | 0.36  | 0.53   | 144.39 |
| Ethyl 2-(4-f       | 0.000  | 0.000  | 0.000   | 0.00  | 0.00   | 20.25  |
| Ethyl myris        | 0.174  | 0.178  | 0.138   | 0.16  | 0.02   | 13.36  |
| Ethyl violet       | 0.002  | 0.001  | 0.001   | 0.00  | 0.00   | 28.67  |
| Ethylmalor         | 0.114  | 0.080  | 0.099   | 0.10  | 0.02   | 17.39  |
| Fingolimoc         | 0.001  | 0.001  | 0.001   | 0.00  | 0.00   | 29.09  |
| Flurandrer         | 0.014  | 0.011  | 0.011   | 0.01  | 0.00   | 11.40  |
| Formonon           | 0.020  | 0.023  | 0.012   | 0.02  | 0.01   | 30.69  |
| Fumaric ac         | 0.071  | 0.057  | 0.066   | 0.06  | 0.01   | 10.54  |
| Gluconic a         | 1.895  | 1.360  | 1.501   | 1.59  | 0.28   | 17.47  |
| Glutaric ac        | 0.228  | 0.216  | 0.188   | 0.21  | 0.02   | 9.86   |
| Glycine            | 0.239  | 0.174  | 0.173   | 0.20  | 0.04   | 19.20  |
| Glycolic ac        | 0.610  | 0.391  | 0.331   | 0.44  | 0.15   | 33.05  |
| Glycyl-L-lei       | 0.010  | 0.001  | 0.008   | 0.01  | 0.00   | 76.19  |
| Guanine            | 0.002  | 0.002  | 0.003   | 0.00  | 0.00   | 32.88  |
| Hexanoylc          | 0.158  | 0.122  | 0.158   | 0.15  | 0.02   | 14.18  |
| Hypoxanth          | 2.287  | 2.124  | 2.114   | 2.17  | 0.10   | 4.48   |
| Indole-3-ac        | 0.140  | 0.093  | 0.101   | 0.11  | 0.03   | 22.49  |
| Isobutyric         | 0.293  | 0.008  | 0.483   | 0.26  | 0.24   | 91.38  |
| Isoleucine         | 19.227 | 17.866 | 22.460  | 19.85 | 2.36   | 11.89  |
| Isophthalic        | 0.016  | 0.035  | 0.062   | 0.04  | 0.02   | 62.23  |
| L-(-)-Methi        | 0.002  | 0.001  | 0.001   | 0.00  | 0.00   | 15.53  |
| L-(+)-Lactic       | 2.405  | 0.222  | 191.414 | 64.68 | 109.76 | 169.70 |
| L-Alanyl-L-        | 0.003  | 0.004  | 0.005   | 0.00  | 0.00   | 15.85  |
| L-Dopa             | 0.003  | 0.003  | 0.003   | 0.00  | 0.00   | 14.98  |
| L-Glutamic         | 0.728  | 0.595  | 0.675   | 0.67  | 0.07   | 10.06  |
| L-Glutathic        | 0.000  | 0.000  | 0.002   | 0.00  | 0.00   | 123.91 |
| L-Histidine        | 0.205  | 0.156  | 0.187   | 0.18  | 0.02   | 13.51  |
| L-Isoleucin        | 10.018 | 10.000 | 11.780  | 10.60 | 1.02   | 9.65   |
| L-Methion          | 0.641  | 0.617  | 0.675   | 0.64  | 0.03   | 4.55   |
| L-Phenylal         | 10.450 | 10.394 | 10.701  | 10.52 | 0.16   | 1.56   |
| L-Pyrogluta        | 3.326  | 3.175  | 0.181   | 2.23  | 1.77   | 79.64  |
| L-Threonin         | 0.373  | 0.449  | 1.261   | 0.69  | 0.49   | 70.84  |
| L-Tyrosine         | 22.669 | 17.665 | 23.979  | 21.44 | 3.33   | 15.54  |
| L-Tyrosine         | 0.002  | 0.002  | 0.002   | 0.00  | 0.00   | 4.30   |
| L(-)-Carniti       | 16.915 | 14.445 | 15.256  | 15.54 | 1.26   | 8.10   |
| Methylmal          | 3.934  | 3.791  | 3.799   | 3.84  | 0.08   | 2.09   |

|                     |       |       |       |      |      |       |
|---------------------|-------|-------|-------|------|------|-------|
| Methylsuc           | 0.031 | 0.031 | 0.025 | 0.03 | 0.00 | 11.43 |
| N-[5-(tert-         | 0.000 | 0.000 | 0.000 | 0.00 | 0.00 | 11.32 |
| N-[(1S,4S,          | 0.000 | 0.000 | 0.000 | 0.00 | 0.00 | 16.87 |
| N-Ethylglyc         | 0.297 | 0.317 | 0.295 | 0.30 | 0.01 | 3.94  |
| N,N-Bis(2- <i>p</i> | 0.000 | 0.000 | 0.000 | 0.00 | 0.00 | 5.88  |
| N,N-Diethy          | 0.065 | 0.046 | 0.062 | 0.06 | 0.01 | 17.73 |
| N,N-Diethy          | 0.332 | 0.202 | 0.339 | 0.29 | 0.08 | 26.59 |
| N,N-Dimet           | 0.004 | 0.003 | 0.003 | 0.00 | 0.00 | 13.20 |
| N,N'-Dicyc          | 0.028 | 0.020 | 0.025 | 0.02 | 0.00 | 18.41 |
| N'-[6-[(5-cl        | 0.001 | 0.000 | 0.000 | 0.00 | 0.00 | 29.04 |
| N2-(2,4-dir         | 0.000 | 0.000 | 0.000 | 0.00 | 0.00 | 6.40  |
| N2-(3-Pyric         | 0.001 | 0.001 | 0.001 | 0.00 | 0.00 | 9.32  |
| N2,1-Diphe          | 0.000 | 0.000 | 0.000 | 0.00 | 0.00 | 10.18 |
| N6,N6,N6-           | 0.116 | 0.117 | 0.116 | 0.12 | 0.00 | 0.76  |
| N8-Acetyls          | 0.003 | 0.002 | 0.003 | 0.00 | 0.00 | 25.65 |
| Nicotinami          | 0.073 | 0.075 | 0.073 | 0.07 | 0.00 | 1.65  |
| Nicotinami          | 0.045 | 0.040 | 0.041 | 0.04 | 0.00 | 6.51  |
| Nicotinami          | 0.001 | 0.001 | 0.001 | 0.00 | 0.00 | 8.47  |
| Niflumic ac         | 0.001 | 0.000 | 0.000 | 0.00 | 0.00 | 35.30 |
| NP-001346           | 0.001 | 0.001 | 0.001 | 0.00 | 0.00 | 7.30  |
| NP-008147           | 0.035 | 0.030 | 0.027 | 0.03 | 0.00 | 13.03 |
| NP-011220           | 0.066 | 0.065 | 0.061 | 0.06 | 0.00 | 4.43  |
| NP-016455           | 0.093 | 0.079 | 0.095 | 0.09 | 0.01 | 9.69  |
| Orotidine           | 0.022 | 0.021 | 0.019 | 0.02 | 0.00 | 8.59  |
| Palmitoyl s         | 0.881 | 0.452 | 0.141 | 0.49 | 0.37 | 75.59 |
| Perfluoro-          | 0.017 | 0.007 | 0.011 | 0.01 | 0.00 | 39.77 |
| Periciazine         | 0.000 | 0.001 | 0.000 | 0.00 | 0.00 | 29.53 |
| Perillartine        | 0.000 | 0.000 | 0.000 | 0.00 | 0.00 | 8.55  |
| Prolylleuci         | 0.001 | 0.001 | 0.001 | 0.00 | 0.00 | 28.62 |
| Propionylc          | 0.617 | 0.219 | 0.611 | 0.48 | 0.23 | 47.31 |
| Pyridoxam           | 0.002 | 0.001 | 0.002 | 0.00 | 0.00 | 41.45 |
| Pyrimethal          | 0.007 | 0.001 | 0.002 | 0.00 | 0.00 | 92.23 |
| Pyruvic aci         | 0.567 | 0.510 | 0.603 | 0.56 | 0.05 | 8.40  |
| Rhodamine           | 0.001 | 0.001 | 0.001 | 0.00 | 0.00 | 23.98 |
| Ricinine            | 0.000 | 0.000 | 0.000 | 0.00 | 0.00 | 28.43 |
| S-Adenosy           | 0.000 | 0.000 | 0.000 | 0.00 | 0.00 | 9.61  |
| S-Adenosy           | 0.001 | 0.001 | 0.001 | 0.00 | 0.00 | 7.30  |
| Spermidine          | 0.004 | 0.004 | 0.008 | 0.01 | 0.00 | 44.97 |
| Spermine            | 0.002 | 0.002 | 0.002 | 0.00 | 0.00 | 10.91 |
| Sphingosin          | 0.040 | 0.104 | 0.184 | 0.11 | 0.07 | 65.87 |
| Spiperone           | 0.000 | 0.000 | 0.000 | 0.00 | 0.00 | 8.20  |
| Stearamide          | 0.063 | 0.048 | 0.065 | 0.06 | 0.01 | 15.89 |
| tert-Butyl l        | 0.032 | 0.035 | 0.029 | 0.03 | 0.00 | 10.23 |

|                     |        |        |        |       |      |       |
|---------------------|--------|--------|--------|-------|------|-------|
| Thiamine            | 0.011  | 0.012  | 0.012  | 0.01  | 0.00 | 7.84  |
| Thiosildenafil      | 0.001  | 0.000  | 0.001  | 0.00  | 0.00 | 34.78 |
| Thymine             | 0.004  | 0.004  | 0.004  | 0.00  | 0.00 | 3.92  |
| Tolycaine           | 0.016  | 0.001  | 0.013  | 0.01  | 0.01 | 75.76 |
| Tyrosylalanyl       | 0.000  | 0.000  | 0.000  | 0.00  | 0.00 | 18.65 |
| UDP-N-acetyl        | 0.003  | 0.002  | 0.002  | 0.00  | 0.00 | 16.81 |
| Uracil              | 0.426  | 0.259  | 0.395  | 0.36  | 0.09 | 24.62 |
| Valine              | 14.785 | 14.221 | 14.453 | 14.49 | 0.28 | 1.96  |
| Xanthine            | 2.262  | 1.887  | 1.947  | 2.03  | 0.20 | 9.91  |
| $\alpha$ -Aspartyl  | 0.002  | 0.002  | 0.001  | 0.00  | 0.00 | 23.56 |
| $\beta$ -Alanine    | 0.003  | 0.002  | 0.002  | 0.00  | 0.00 | 25.38 |
| $\beta$ -Nicotina   | 0.001  | 0.001  | 0.001  | 0.00  | 0.00 | 10.82 |
| $\gamma$ -Glutamy   | 0.008  | 0.005  | 0.005  | 0.01  | 0.00 | 30.08 |
| $\gamma$ -L-Glutarr | 0.002  | 0.002  | 0.002  | 0.00  | 0.00 | 28.19 |

**13.20**

With outlier

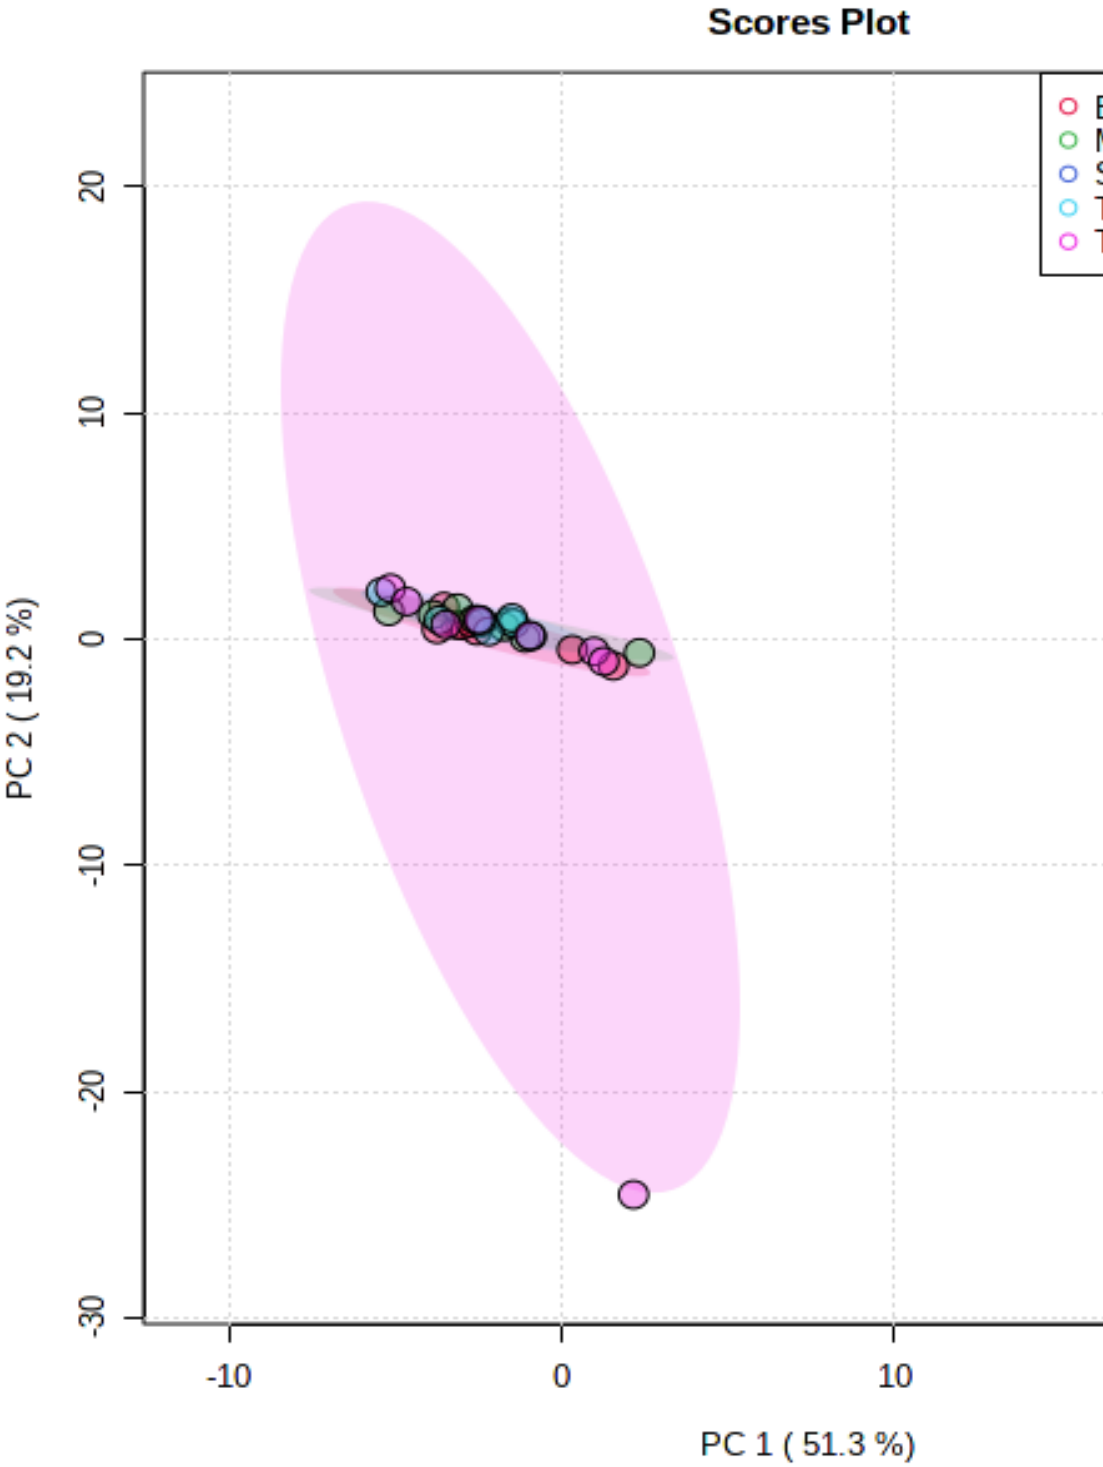

With outlier without SRM1950

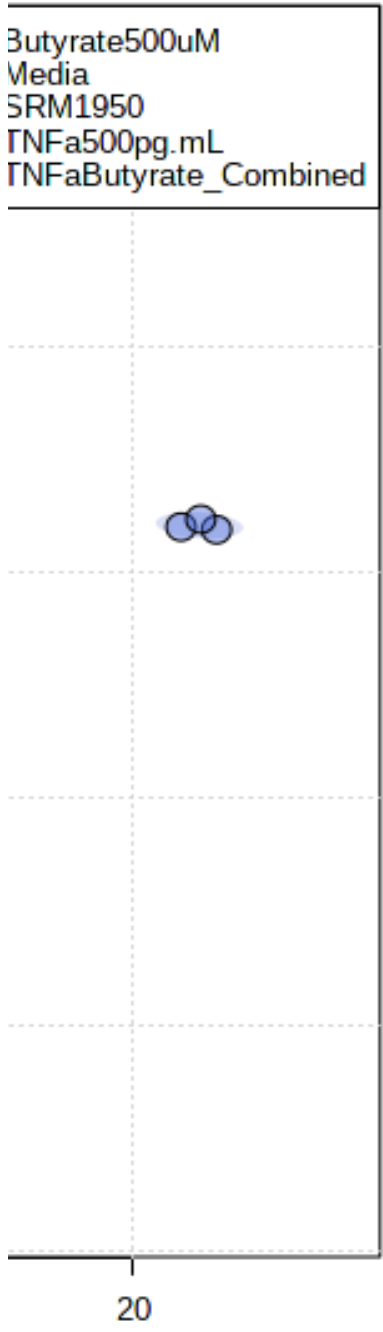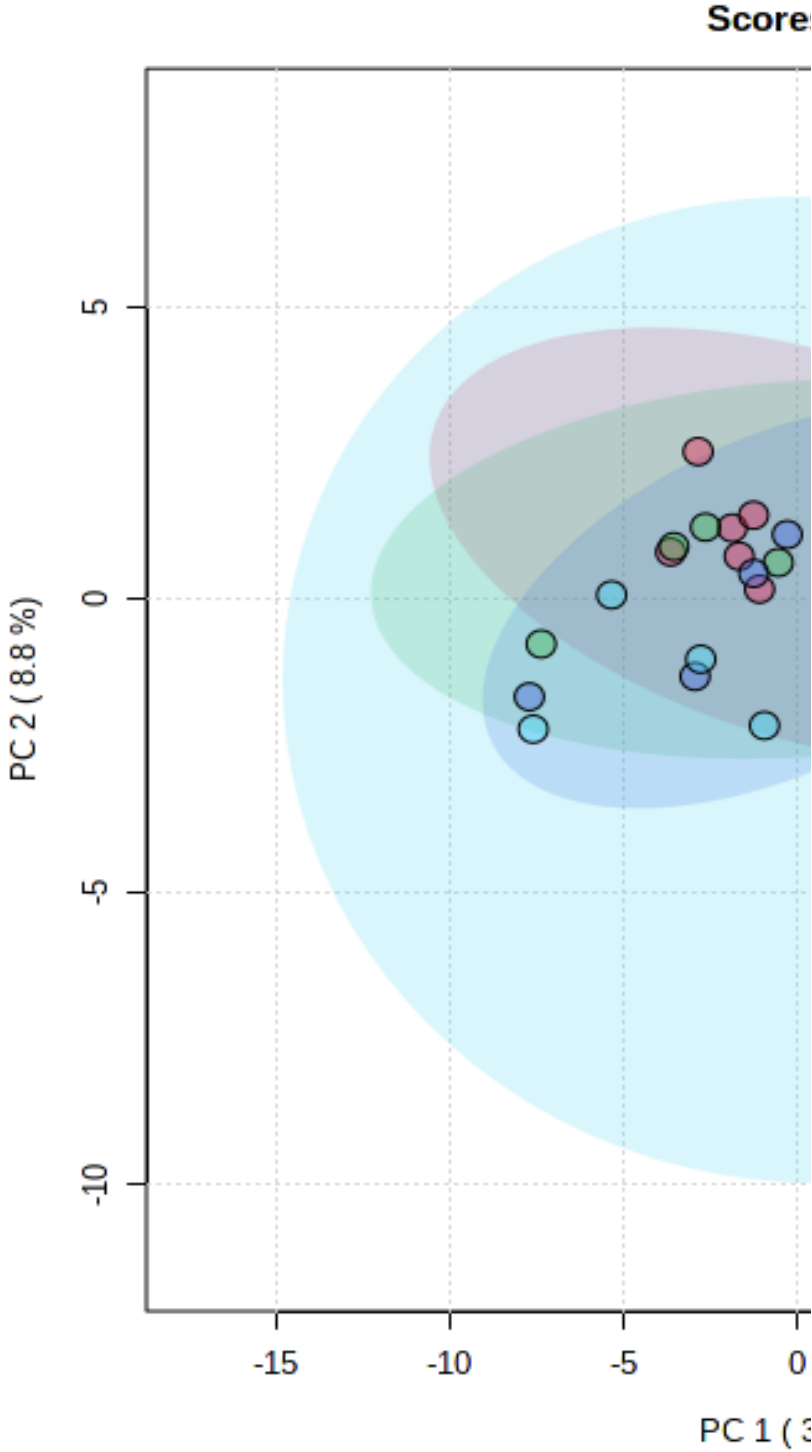

Without outlier without SR

s Plot

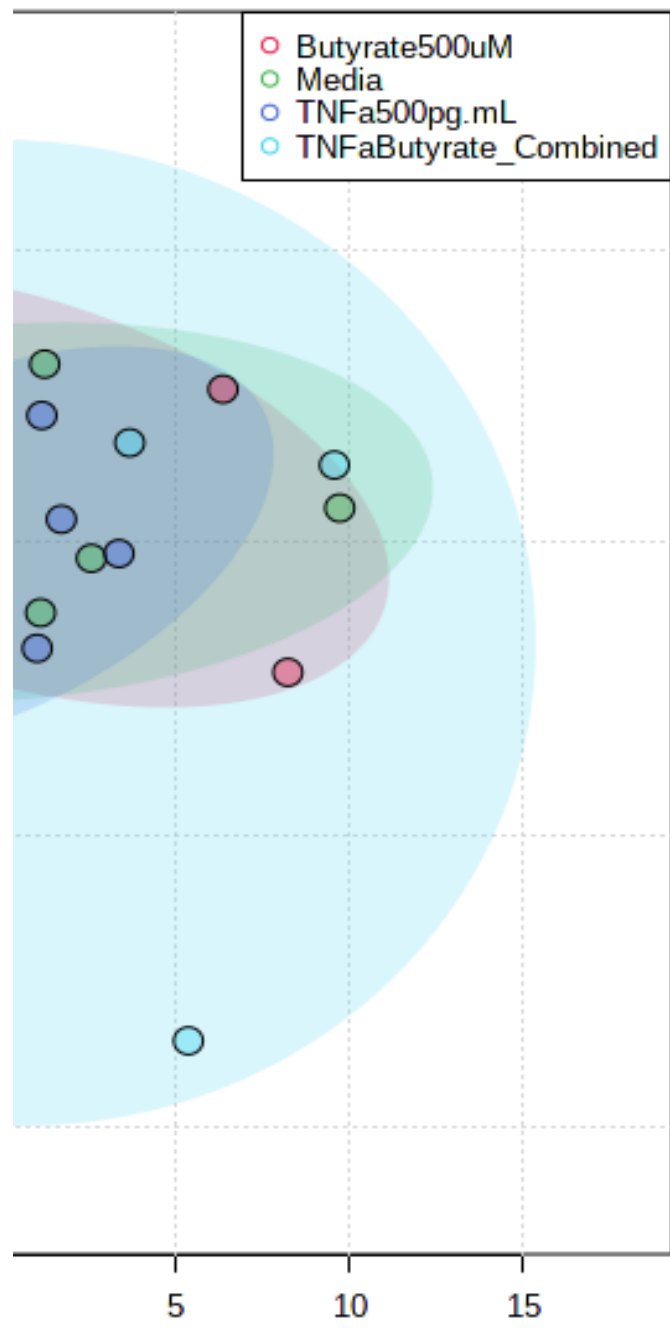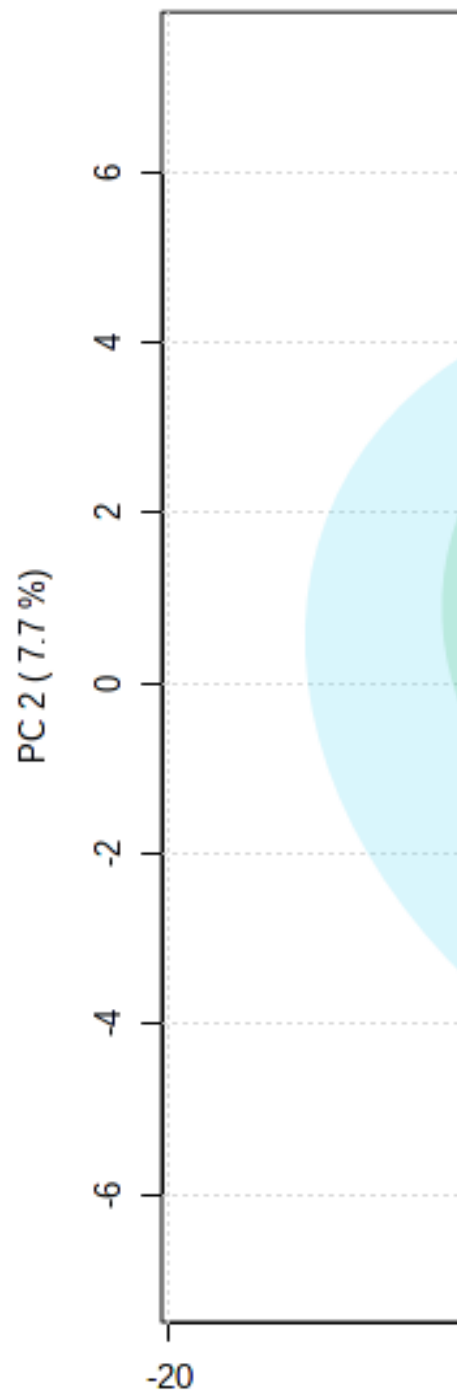

**Scores Plot**

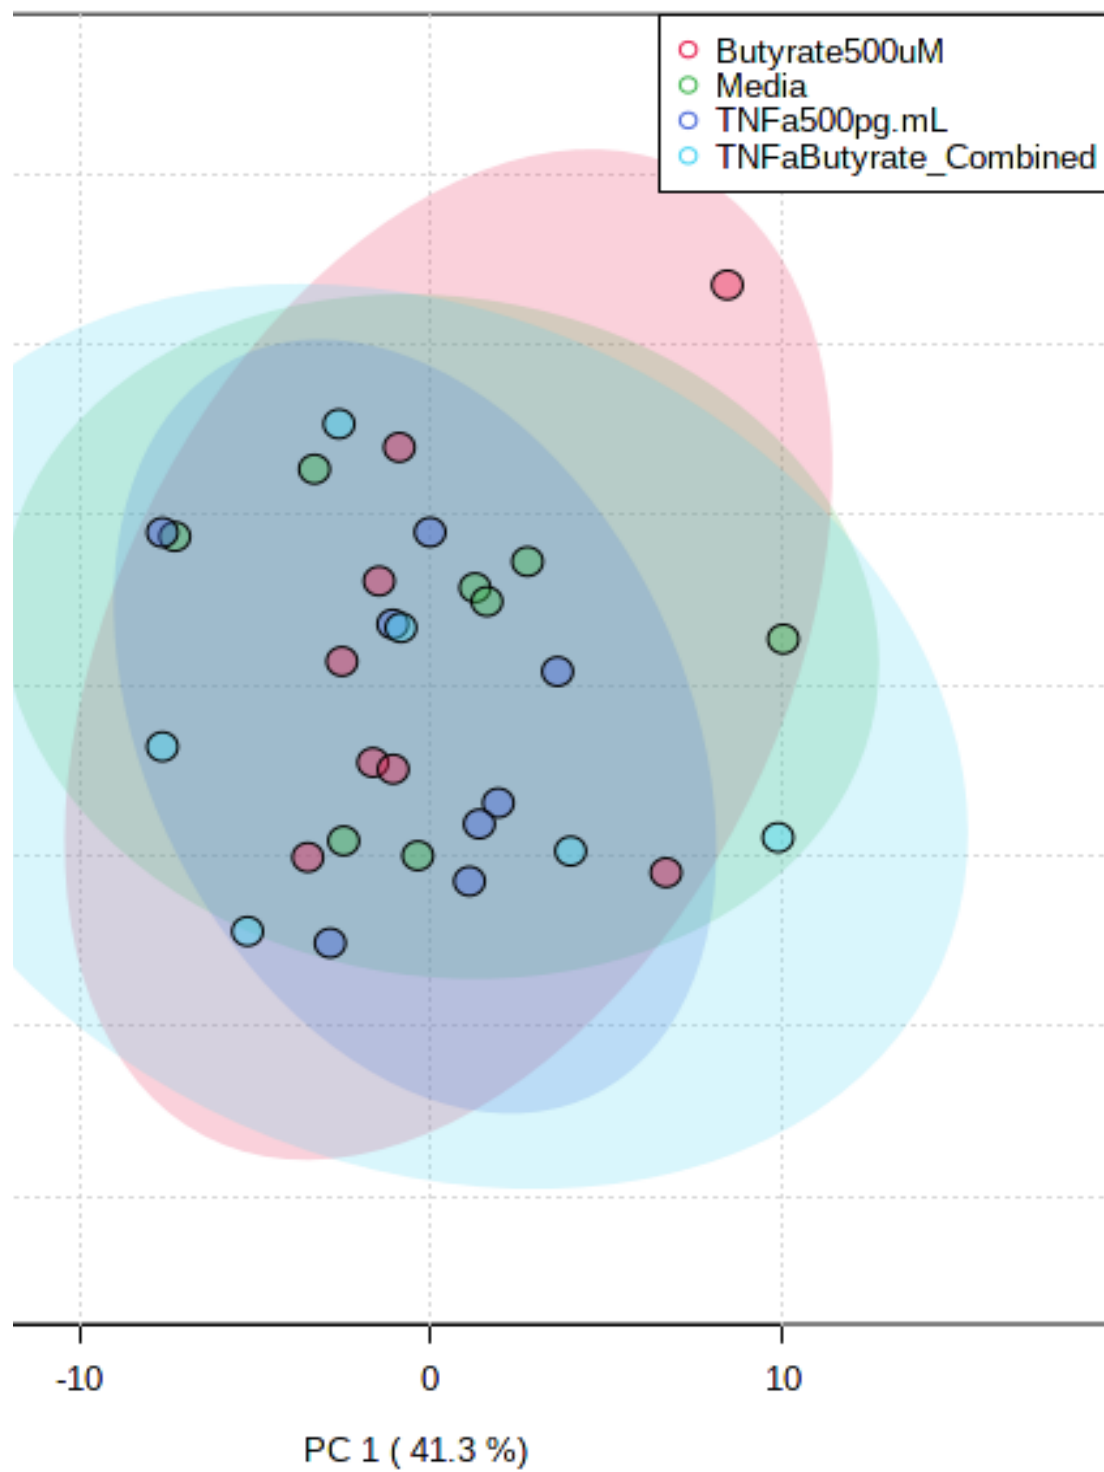

|           | f.value | p.value    | -LOG10(p) | FDR      | Fisher's LSD              |
|-----------|---------|------------|-----------|----------|---------------------------|
| Bioplerin | 10.488  | 0.00010608 | 3.9744    | 0.019624 | Butyrate500uM - Media; T1 |

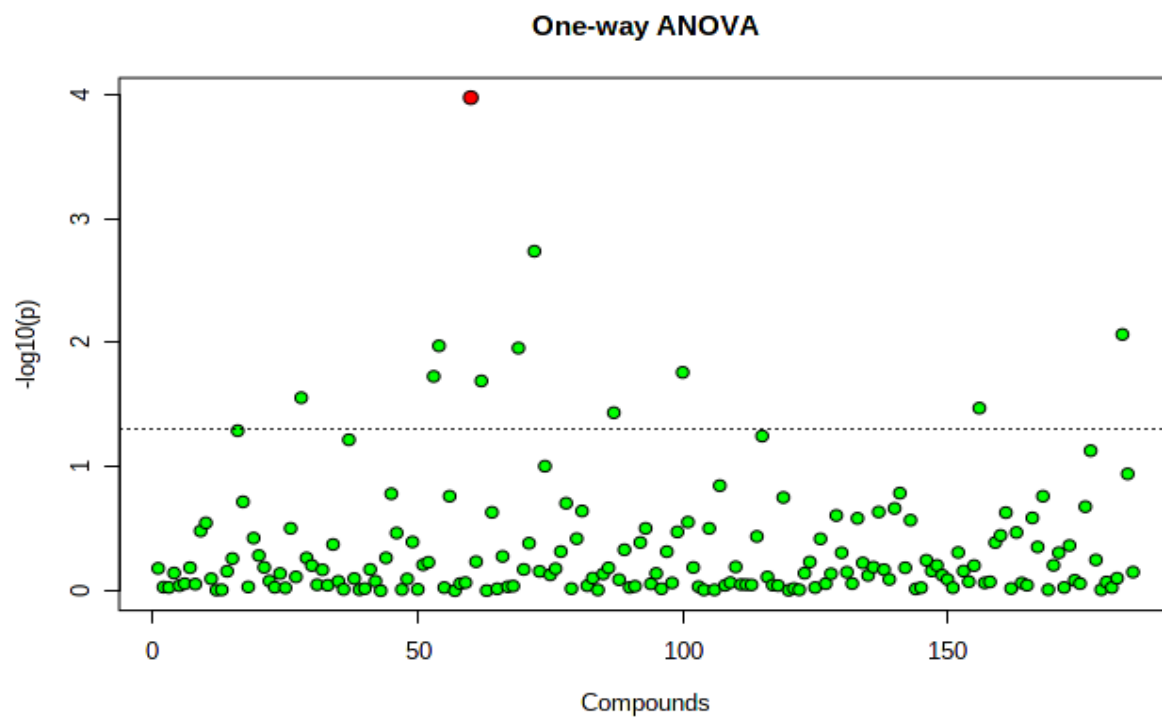

√FaButyrate\_Combined - Butyrate500uM; TNFa500pg.mL - Media; TNFaButyrate\_Combined - M

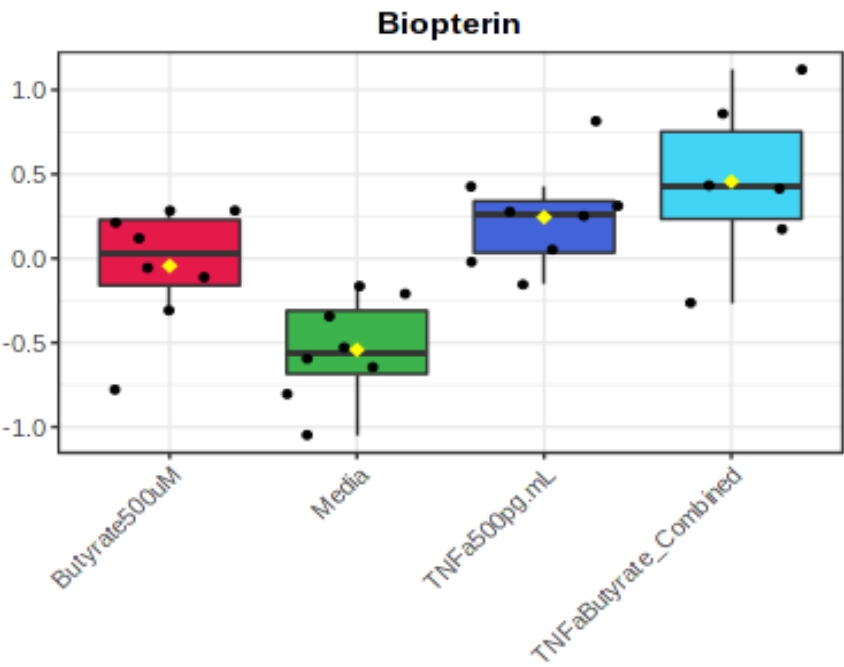

edia

FDR adjusted  $p < 0.05$

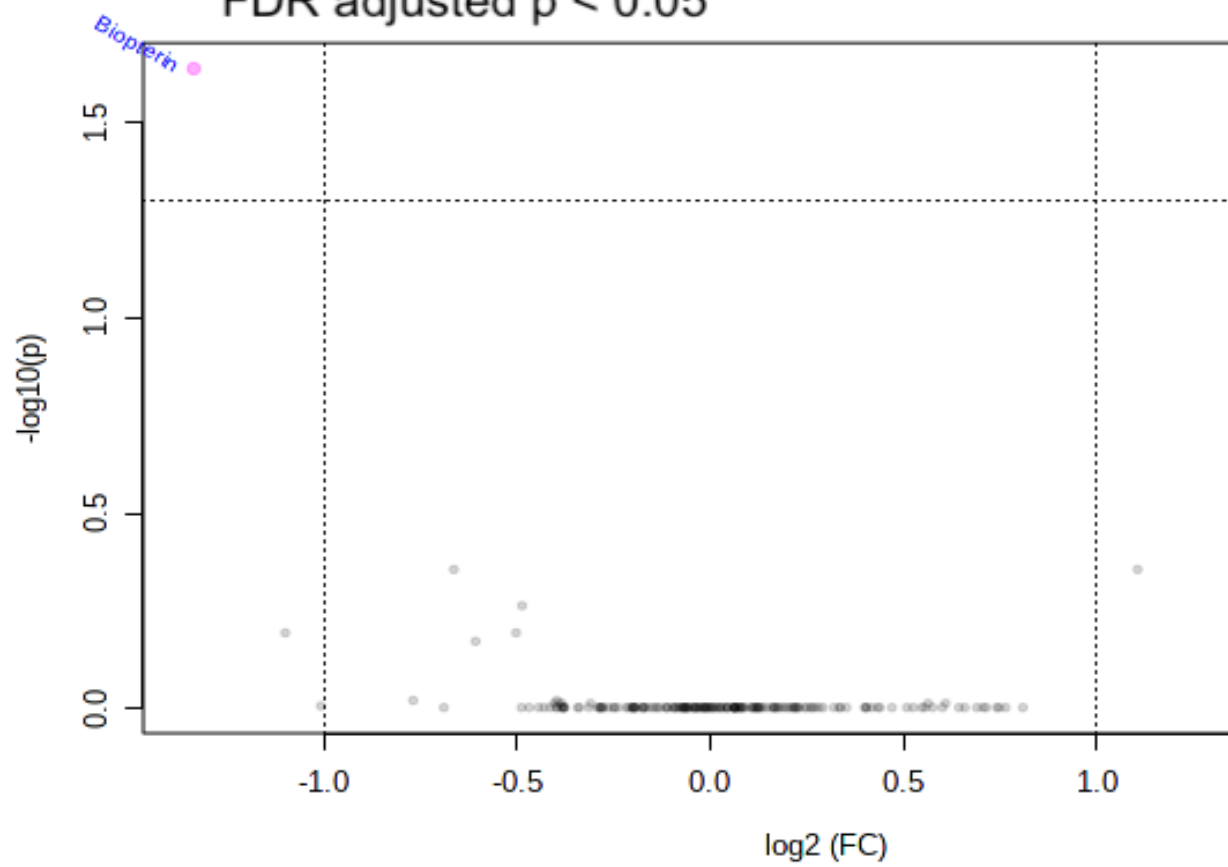

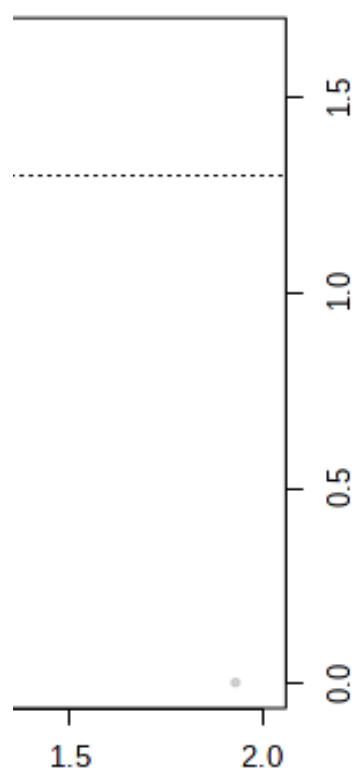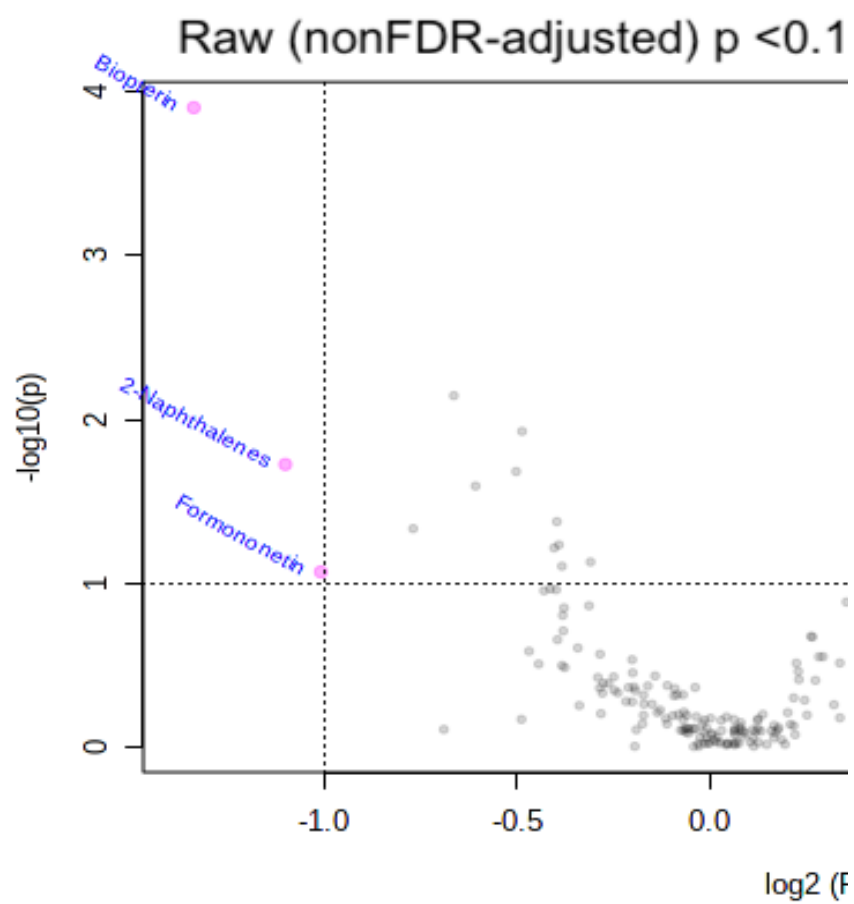

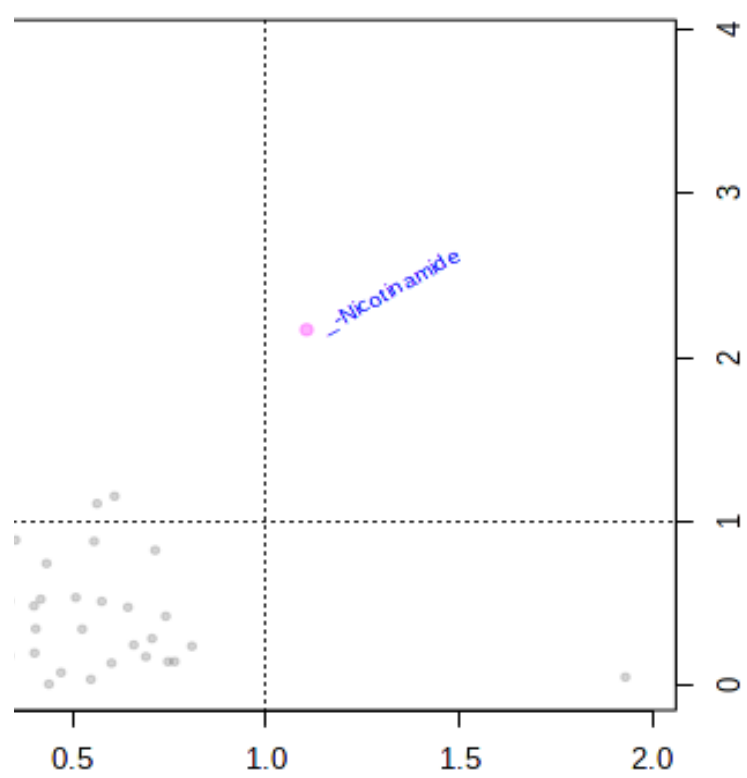

FC)

FDR-adjusted  $p < 0.05$

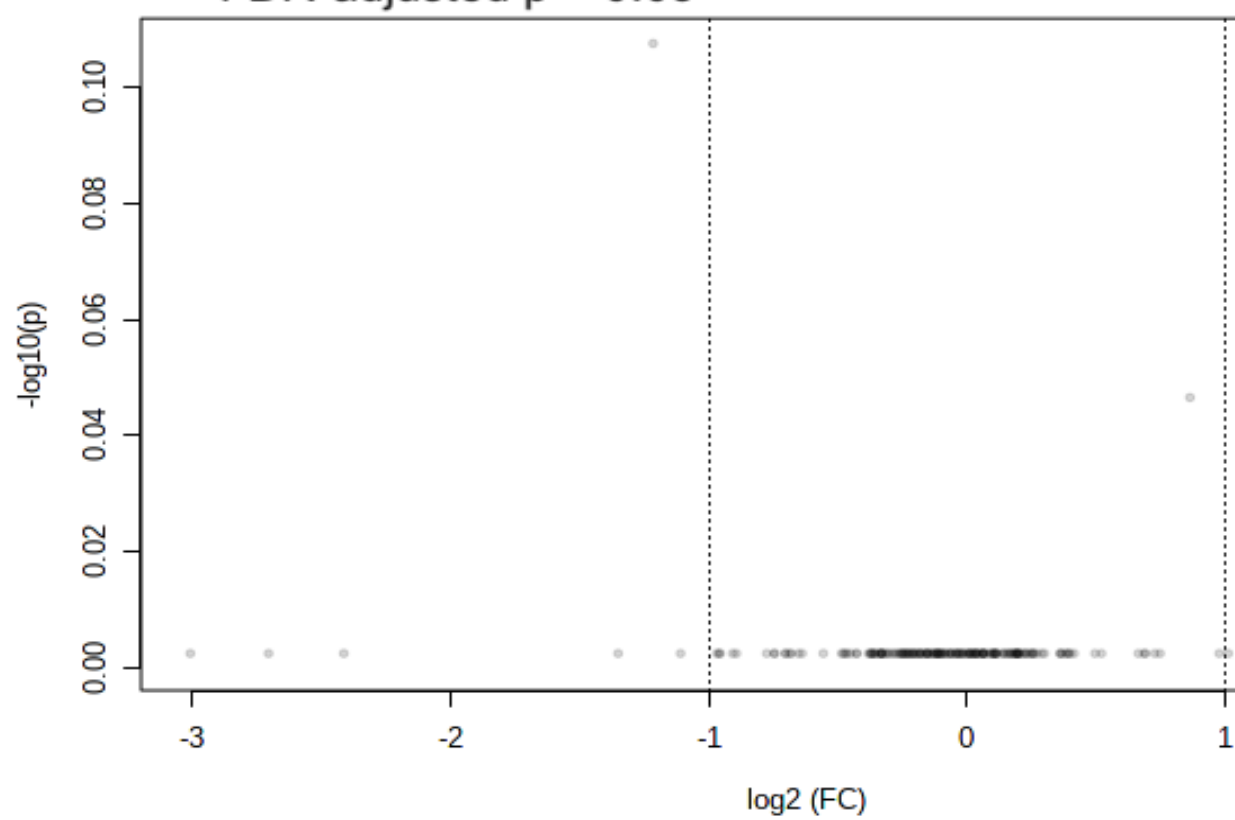

Raw (nonFI

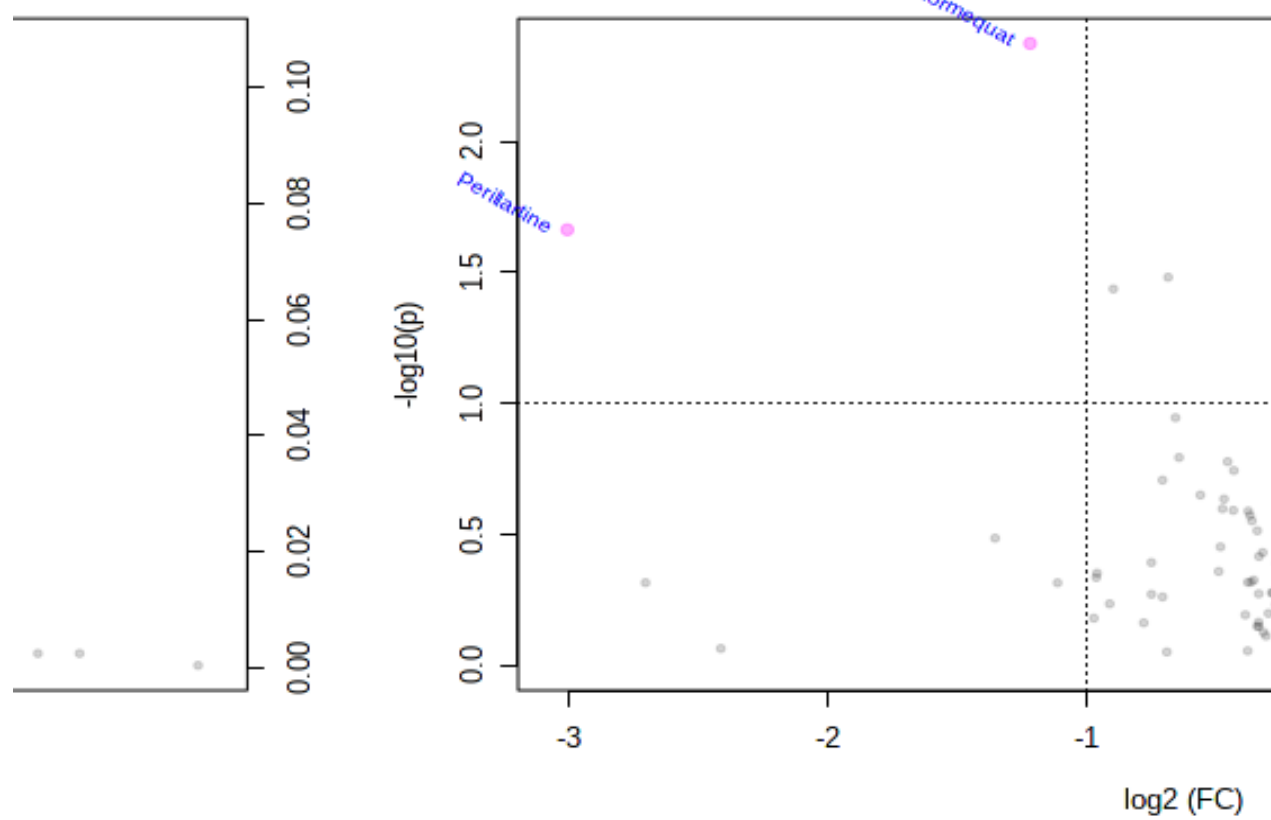

DR-adjusted)  $p < 0.1$

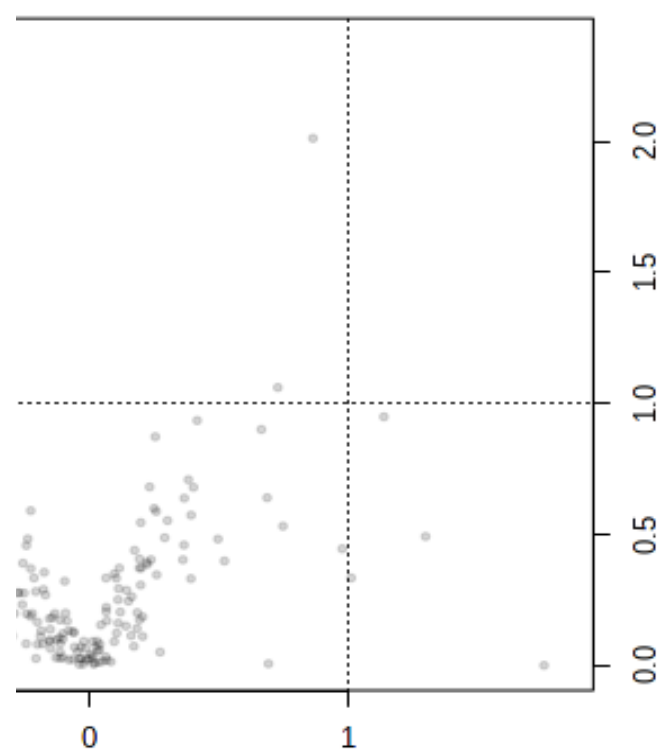

FDR-adjusted  $p < 0.05$

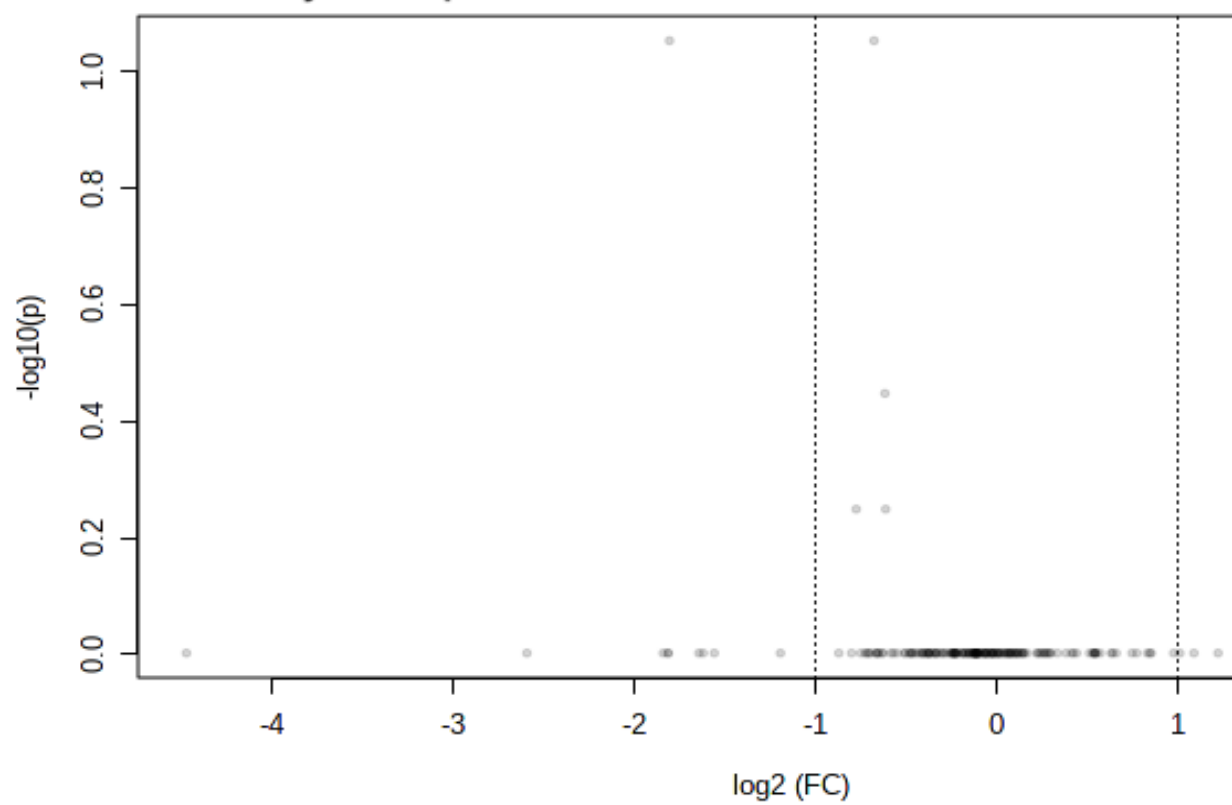

Raw (nonf

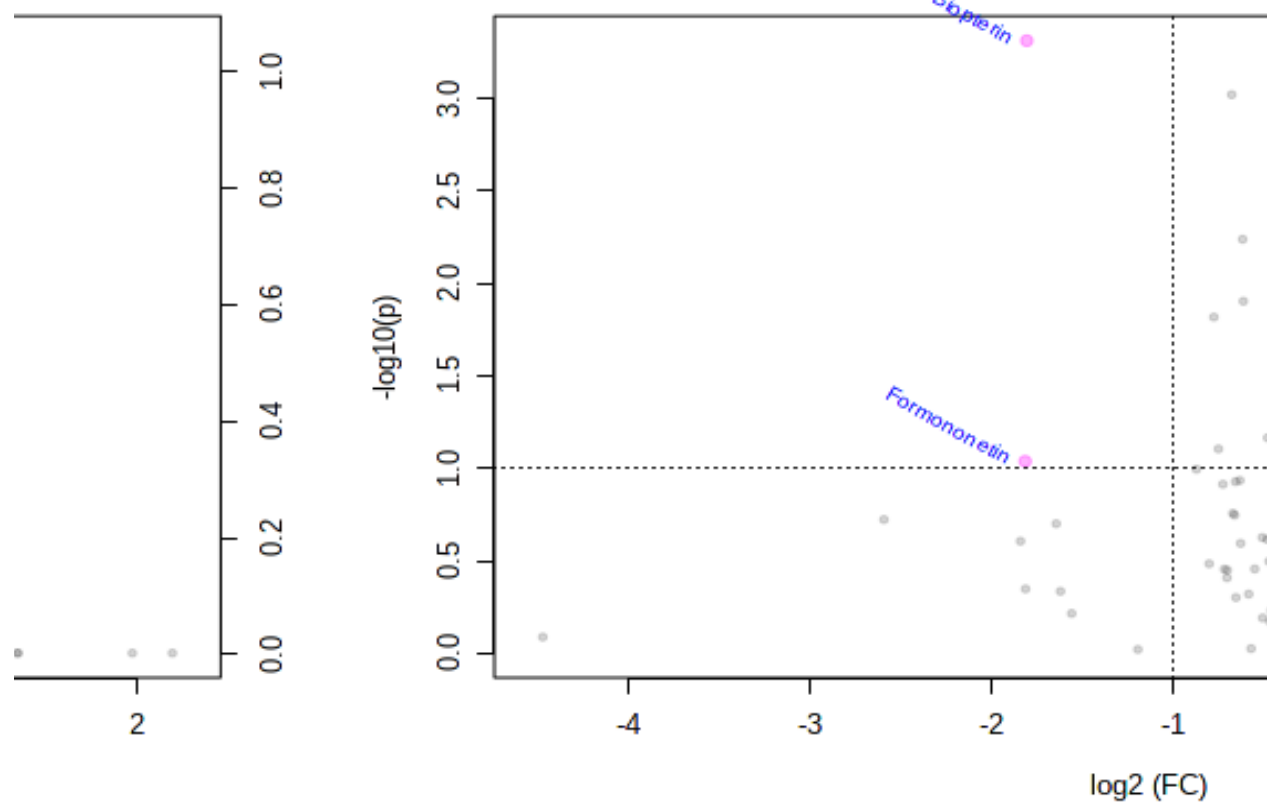

FDR-adjusted  $p < 0.1$

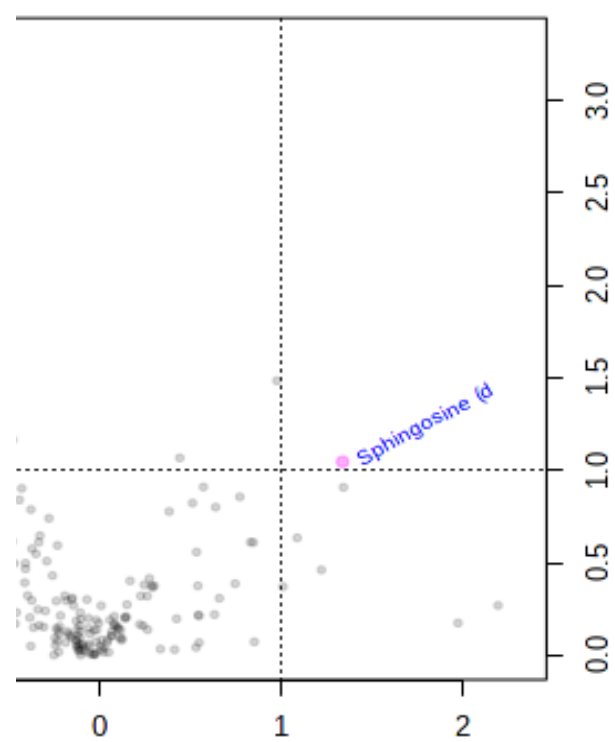

| Treatment          | Dunn's multiple comparisons test | Mean rank | Significant | Summary |
|--------------------|----------------------------------|-----------|-------------|---------|
| Media vs lysis     | Media vs. Lysis                  | 82.17     | Yes         | **      |
| Media vs TNF alpha | Media vs. 50pg/mL                | 21.5      | No          | ns      |
| Media vs TNF alpha | Media vs. 100pg/mL               | 7.167     | No          | ns      |
| Media vs TNF alpha | Media vs. 150pg/mL               | 31.17     | No          | ns      |
| Media vs TNF alpha | Media vs. 200pg/mL               | 37.5      | No          | ns      |
| Media vs TNF alpha | Media vs. 250pg/mL               | 35.17     | No          | ns      |
| Media vs TNF alpha | Media vs. 500pg/mL               | 48.5      | No          | ns      |
| Media vs TNF alpha | Media vs. 1ng/mL                 | 59.17     | No          | ns      |
| Media vs TNF alpha | Media vs. 2.5ng/mL               | 73.17     | Yes         | *       |
| Media vs TNF alpha | Media vs. 5ng/mL                 | 76.17     | Yes         | *       |
| Media vs TNF alpha | Media vs. 10ng/mL                | 79.17     | Yes         | **      |
| Media vs butyrate  | Media vs. 50μM                   | 7.167     | No          | ns      |
| Media vs butyrate  | Media vs. 75μM                   | 7.833     | No          | ns      |
| Media vs butyrate  | Media vs. 100μM                  | 12.17     | No          | ns      |
| Media vs butyrate  | Media vs. 250μM                  | 0.8333    | No          | ns      |
| Media vs butyrate  | Media vs. 500μM                  | 19.17     | No          | ns      |
| Media vs butyrate  | Media vs. 750μM                  | 30.83     | No          | ns      |
| Media vs butyrate  | Media vs. 1mM                    | 42.5      | No          | ns      |
| Media vs butyrate  | Media vs. 2.5mM                  | 55.17     | No          | ns      |
| Media vs butyrate  | Media vs. 5mM                    | 60.17     | No          | ns      |
| Media vs butyrate  | Media vs. 7.5mM                  | 65.17     | No          | ns      |
| Media vs butyrate  | Media vs. 10mM                   | 70.17     | No          | ns      |
| Media vs butyrate  | Media vs. 25mM                   | 66.17     | No          | ns      |
| Media vs. Combo    | Media vs. 50pg/mL                | 16.17     | No          | ns      |
| Media vs. Combo    | Media vs. 150pg/mL               | 26.17     | No          | ns      |
| Media vs. Combo    | Media vs. 250pg/mL               | 30.5      | No          | ns      |
| Media vs. Combo    | Media vs. 500pg/mL               | 46.83     | No          | ns      |
| Media vs. Combo    | Media vs. 1ng/mL                 | 52.17     | No          | ns      |
| Lysis vs TNF alpha | Lysis vs. 50pg/mL                | -60.67    | No          | ns      |
| Lysis vs TNF alpha | Lysis vs. 100pg/mL               | -75       | No          | ns      |
| Lysis vs TNF alpha | Lysis vs. 150pg/mL               | -51       | No          | ns      |
| Lysis vs TNF alpha | Lysis vs. 200pg/mL               | -44.67    | No          | ns      |
| Lysis vs TNF alpha | Lysis vs. 250pg/mL               | -47       | No          | ns      |
| Lysis vs TNF alpha | Lysis vs. 500pg/mL               | -33.67    | No          | ns      |
| Lysis vs TNF alpha | Lysis vs. 1ng/mL                 | -23       | No          | ns      |
| Lysis vs TNF alpha | Lysis vs. 2.5ng/mL               | -9        | No          | ns      |
| Lysis vs TNF alpha | Lysis vs. 5ng/mL                 | -6        | No          | ns      |
| Lysis vs TNF alpha | Lysis vs. 10ng/mL                | -3        | No          | ns      |
| Lysis vs butyrate  | Lysis vs. 50μM                   | -75       | No          | ns      |
| Lysis vs butyrate  | Lysis vs. 75μM                   | -74.33    | No          | ns      |
| Lysis vs butyrate  | Lysis vs. 100μM                  | -70       | No          | ns      |
| Lysis vs butyrate  | Lysis vs. 250μM                  | -81.33    | No          | ns      |
| Lysis vs butyrate  | Lysis vs. 500μM                  | -63       | No          | ns      |
| Lysis vs butyrate  | Lysis vs. 750μM                  | -51.33    | No          | ns      |
| Lysis vs butyrate  | Lysis vs. 1mM                    | -39.67    | No          | ns      |
| Lysis vs butyrate  | Lysis vs. 2.5mM                  | -27       | No          | ns      |

|                   |                       |        |    |    |      |
|-------------------|-----------------------|--------|----|----|------|
| Lysis vs butyrate | Lysis vs. 5mM         | -22    | No | ns | B-U  |
| Lysis vs butyrate | Lysis vs. 7.5mM       | -17    | No | ns | B-V  |
| Lysis vs butyrate | Lysis vs. 10mM        | -12    | No | ns | B-W  |
| Lysis vs butyrate | Lysis vs. 25mM        | -16    | No | ns | B-X  |
| Lysis vs. Combo   | Lysis vs. 50pg/mL     | -66    | No | ns | B-Y  |
| Lysis vs. Combo   | Lysis vs. 150pg/mL    | -56    | No | ns | B-Z  |
| Lysis vs. Combo   | Lysis vs. 250pg/mL    | -51.67 | No | ns | B-AA |
| Lysis vs. Combo   | Lysis vs. 500pg/mL    | -35.33 | No | ns | B-AB |
| Lysis vs. Combo   | Lysis vs. 1ng/mL      | -30    | No | ns | B-AC |
| TNFa vs. TNFa     | 50pg/mL vs. 100pg/mL  | -14.33 | No | ns | C-D  |
| TNFa vs. TNFa     | 50pg/mL vs. 150pg/mL  | 9.667  | No | ns | C-E  |
| TNFa vs. TNFa     | 50pg/mL vs. 200pg/mL  | 16     | No | ns | C-F  |
| TNFa vs. TNFa     | 50pg/mL vs. 250pg/mL  | 13.67  | No | ns | C-G  |
| TNFa vs. TNFa     | 50pg/mL vs. 500pg/mL  | 27     | No | ns | C-H  |
| TNFa vs. TNFa     | 50pg/mL vs. 1ng/mL    | 37.67  | No | ns | C-I  |
| TNFa vs. TNFa     | 50pg/mL vs. 2.5ng/mL  | 51.67  | No | ns | C-J  |
| TNFa vs. TNFa     | 50pg/mL vs. 5ng/mL    | 54.67  | No | ns | C-K  |
| TNFa vs. TNFa     | 50pg/mL vs. 10ng/mL   | 57.67  | No | ns | C-L  |
| TNFa vs. Butyrate | 50pg/mL vs. 50µM      | -14.33 | No | ns | C-M  |
| TNFa vs. Butyrate | 50pg/mL vs. 75µM      | -13.67 | No | ns | C-N  |
| TNFa vs. Butyrate | 50pg/mL vs. 100µM     | -9.333 | No | ns | C-O  |
| TNFa vs. Butyrate | 50pg/mL vs. 250µM     | -20.67 | No | ns | C-P  |
| TNFa vs. Butyrate | 50pg/mL vs. 500µM     | -2.333 | No | ns | C-Q  |
| TNFa vs. Butyrate | 50pg/mL vs. 750µM     | 9.333  | No | ns | C-R  |
| TNFa vs. Butyrate | 50pg/mL vs. 1mM       | 21     | No | ns | C-S  |
| TNFa vs. Butyrate | 50pg/mL vs. 2.5mM     | 33.67  | No | ns | C-T  |
| TNFa vs. Butyrate | 50pg/mL vs. 5mM       | 38.67  | No | ns | C-U  |
| TNFa vs. Butyrate | 50pg/mL vs. 7.5mM     | 43.67  | No | ns | C-V  |
| TNFa vs. Butyrate | 50pg/mL vs. 10mM      | 48.67  | No | ns | C-W  |
| TNFa vs. Butyrate | 50pg/mL vs. 25mM      | 44.67  | No | ns | C-X  |
| TNFa vs. Combo    | 50pg/mL vs. 50pg/mL   | -5.333 | No | ns | C-Y  |
| TNFa vs. Combo    | 50pg/mL vs. 150pg/mL  | 4.667  | No | ns | C-Z  |
| TNFa vs. Combo    | 50pg/mL vs. 250pg/mL  | 9      | No | ns | C-AA |
| TNFa vs. Combo    | 50pg/mL vs. 500pg/mL  | 25.33  | No | ns | C-AB |
| TNFa vs. Combo    | 50pg/mL vs. 1ng/mL    | 30.67  | No | ns | C-AC |
| TNFa vs. TNFa     | 100pg/mL vs. 150pg/mL | 24     | No | ns | D-E  |
| TNFa vs. TNFa     | 100pg/mL vs. 200pg/mL | 30.33  | No | ns | D-F  |
| TNFa vs. TNFa     | 100pg/mL vs. 250pg/mL | 28     | No | ns | D-G  |
| TNFa vs. TNFa     | 100pg/mL vs. 500pg/mL | 41.33  | No | ns | D-H  |
| TNFa vs. TNFa     | 100pg/mL vs. 1ng/mL   | 52     | No | ns | D-I  |
| TNFa vs. TNFa     | 100pg/mL vs. 2.5ng/mL | 66     | No | ns | D-J  |
| TNFa vs. TNFa     | 100pg/mL vs. 5ng/mL   | 69     | No | ns | D-K  |
| TNFa vs. TNFa     | 100pg/mL vs. 10ng/mL  | 72     | No | ns | D-L  |
| TNFa vs. Butyrate | 100pg/mL vs. 50µM     | 0      | No | ns | D-M  |
| TNFa vs. Butyrate | 100pg/mL vs. 75µM     | 0.6667 | No | ns | D-N  |
| TNFa vs. Butyrate | 100pg/mL vs. 100µM    | 5      | No | ns | D-O  |
| TNFa vs. Butyrate | 100pg/mL vs. 250µM    | -6.333 | No | ns | D-P  |

|                   |                       |            |    |      |
|-------------------|-----------------------|------------|----|------|
| TNFa vs. Butyrate | 100pg/mL vs. 500µM    | 12 No      | ns | D-Q  |
| TNFa vs. Butyrate | 100pg/mL vs. 750µM    | 23.67 No   | ns | D-R  |
| TNFa vs. Butyrate | 100pg/mL vs. 1mM      | 35.33 No   | ns | D-S  |
| TNFa vs. Butyrate | 100pg/mL vs. 2.5mM    | 48 No      | ns | D-T  |
| TNFa vs. Butyrate | 100pg/mL vs. 5mM      | 53 No      | ns | D-U  |
| TNFa vs. Butyrate | 100pg/mL vs. 7.5mM    | 58 No      | ns | D-V  |
| TNFa vs. Butyrate | 100pg/mL vs. 10mM     | 63 No      | ns | D-W  |
| TNFa vs. Butyrate | 100pg/mL vs. 25mM     | 59 No      | ns | D-X  |
| TNFa vs. Combo    | 100pg/mL vs. 50pg/mL  | 9 No       | ns | D-Y  |
| TNFa vs. Combo    | 100pg/mL vs. 150pg/mL | 19 No      | ns | D-Z  |
| TNFa vs. Combo    | 100pg/mL vs. 250pg/mL | 23.33 No   | ns | D-AA |
| TNFa vs. Combo    | 100pg/mL vs. 500pg/mL | 39.67 No   | ns | D-AB |
| TNFa vs. Combo    | 100pg/mL vs. 1ng/mL   | 45 No      | ns | D-AC |
| TNFa vs. TNFa     | 150pg/mL vs. 200pg/mL | 6.333 No   | ns | E-F  |
| TNFa vs. TNFa     | 150pg/mL vs. 250pg/mL | 4 No       | ns | E-G  |
| TNFa vs. TNFa     | 150pg/mL vs. 500pg/mL | 17.33 No   | ns | E-H  |
| TNFa vs. TNFa     | 150pg/mL vs. 1ng/mL   | 28 No      | ns | E-I  |
| TNFa vs. TNFa     | 150pg/mL vs. 2.5ng/mL | 42 No      | ns | E-J  |
| TNFa vs. TNFa     | 150pg/mL vs. 5ng/mL   | 45 No      | ns | E-K  |
| TNFa vs. TNFa     | 150pg/mL vs. 10ng/mL  | 48 No      | ns | E-L  |
| TNFa vs. Butyrate | 150pg/mL vs. 50µM     | -24 No     | ns | E-M  |
| TNFa vs. Butyrate | 150pg/mL vs. 75µM     | -23.33 No  | ns | E-N  |
| TNFa vs. Butyrate | 150pg/mL vs. 100µM    | -19 No     | ns | E-O  |
| TNFa vs. Butyrate | 150pg/mL vs. 250µM    | -30.33 No  | ns | E-P  |
| TNFa vs. Butyrate | 150pg/mL vs. 500µM    | -12 No     | ns | E-Q  |
| TNFa vs. Butyrate | 150pg/mL vs. 750µM    | -0.3333 No | ns | E-R  |
| TNFa vs. Butyrate | 150pg/mL vs. 1mM      | 11.33 No   | ns | E-S  |
| TNFa vs. Butyrate | 150pg/mL vs. 2.5mM    | 24 No      | ns | E-T  |
| TNFa vs. Butyrate | 150pg/mL vs. 5mM      | 29 No      | ns | E-U  |
| TNFa vs. Butyrate | 150pg/mL vs. 7.5mM    | 34 No      | ns | E-V  |
| TNFa vs. Butyrate | 150pg/mL vs. 10mM     | 39 No      | ns | E-W  |
| TNFa vs. Butyrate | 150pg/mL vs. 25mM     | 35 No      | ns | E-X  |
| TNFa vs. Combo    | 150pg/mL vs. 50pg/mL  | -15 No     | ns | E-Y  |
| TNFa vs. Combo    | 150pg/mL vs. 150pg/mL | -5 No      | ns | E-Z  |
| TNFa vs. Combo    | 150pg/mL vs. 250pg/mL | -0.6667 No | ns | E-AA |
| TNFa vs. Combo    | 150pg/mL vs. 500pg/mL | 15.67 No   | ns | E-AB |
| TNFa vs. Combo    | 150pg/mL vs. 1ng/mL   | 21 No      | ns | E-AC |
| TNFa vs. TNFa     | 200pg/mL vs. 250pg/mL | -2.333 No  | ns | F-G  |
| TNFa vs. TNFa     | 200pg/mL vs. 500pg/mL | 11 No      | ns | F-H  |
| TNFa vs. TNFa     | 200pg/mL vs. 1ng/mL   | 21.67 No   | ns | F-I  |
| TNFa vs. TNFa     | 200pg/mL vs. 2.5ng/mL | 35.67 No   | ns | F-J  |
| TNFa vs. TNFa     | 200pg/mL vs. 5ng/mL   | 38.67 No   | ns | F-K  |
| TNFa vs. TNFa     | 200pg/mL vs. 10ng/mL  | 41.67 No   | ns | F-L  |
| TNFa vs. Butyrate | 200pg/mL vs. 50µM     | -30.33 No  | ns | F-M  |
| TNFa vs. Butyrate | 200pg/mL vs. 75µM     | -29.67 No  | ns | F-N  |
| TNFa vs. Butyrate | 200pg/mL vs. 100µM    | -25.33 No  | ns | F-O  |
| TNFa vs. Butyrate | 200pg/mL vs. 250µM    | -36.67 No  | ns | F-P  |

|                   |                       |        |    |    |      |
|-------------------|-----------------------|--------|----|----|------|
| TNFa vs. Butyrate | 200pg/mL vs. 500µM    | -18.33 | No | ns | F-Q  |
| TNFa vs. Butyrate | 200pg/mL vs. 750µM    | -6.667 | No | ns | F-R  |
| TNFa vs. Butyrate | 200pg/mL vs. 1mM      | 5      | No | ns | F-S  |
| TNFa vs. Butyrate | 200pg/mL vs. 2.5mM    | 17.67  | No | ns | F-T  |
| TNFa vs. Butyrate | 200pg/mL vs. 5mM      | 22.67  | No | ns | F-U  |
| TNFa vs. Butyrate | 200pg/mL vs. 7.5mM    | 27.67  | No | ns | F-V  |
| TNFa vs. Butyrate | 200pg/mL vs. 10mM     | 32.67  | No | ns | F-W  |
| TNFa vs. Butyrate | 200pg/mL vs. 25mM     | 28.67  | No | ns | F-X  |
| TNFa vs. Combo    | 200pg/mL vs. 50pg/mL  | -21.33 | No | ns | F-Y  |
| TNFa vs. Combo    | 200pg/mL vs. 150pg/mL | -11.33 | No | ns | F-Z  |
| TNFa vs. Combo    | 200pg/mL vs. 250pg/mL | -7     | No | ns | F-AA |
| TNFa vs. Combo    | 200pg/mL vs. 500pg/mL | 9.333  | No | ns | F-AB |
| TNFa vs. Combo    | 200pg/mL vs. 1ng/mL   | 14.67  | No | ns | F-AC |
| TNFa vs. TNFa     | 250pg/mL vs. 500pg/mL | 13.33  | No | ns | G-H  |
| TNFa vs. TNFa     | 250pg/mL vs. 1ng/mL   | 24     | No | ns | G-I  |
| TNFa vs. TNFa     | 250pg/mL vs. 2.5ng/mL | 38     | No | ns | G-J  |
| TNFa vs. TNFa     | 250pg/mL vs. 5ng/mL   | 41     | No | ns | G-K  |
| TNFa vs. TNFa     | 250pg/mL vs. 10ng/mL  | 44     | No | ns | G-L  |
| TNFa vs. Butyrate | 250pg/mL vs. 50µM     | -28    | No | ns | G-M  |
| TNFa vs. Butyrate | 250pg/mL vs. 75µM     | -27.33 | No | ns | G-N  |
| TNFa vs. Butyrate | 250pg/mL vs. 100µM    | -23    | No | ns | G-O  |
| TNFa vs. Butyrate | 250pg/mL vs. 250µM    | -34.33 | No | ns | G-P  |
| TNFa vs. Butyrate | 250pg/mL vs. 500µM    | -16    | No | ns | G-Q  |
| TNFa vs. Butyrate | 250pg/mL vs. 750µM    | -4.333 | No | ns | G-R  |
| TNFa vs. Butyrate | 250pg/mL vs. 1mM      | 7.333  | No | ns | G-S  |
| TNFa vs. Butyrate | 250pg/mL vs. 2.5mM    | 20     | No | ns | G-T  |
| TNFa vs. Butyrate | 250pg/mL vs. 5mM      | 25     | No | ns | G-U  |
| TNFa vs. Butyrate | 250pg/mL vs. 7.5mM    | 30     | No | ns | G-V  |
| TNFa vs. Butyrate | 250pg/mL vs. 10mM     | 35     | No | ns | G-W  |
| TNFa vs. Butyrate | 250pg/mL vs. 25mM     | 31     | No | ns | G-X  |
| TNFa vs. Combo    | 250pg/mL vs. 50pg/mL  | -19    | No | ns | G-Y  |
| TNFa vs. Combo    | 250pg/mL vs. 150pg/mL | -9     | No | ns | G-Z  |
| TNFa vs. Combo    | 250pg/mL vs. 250pg/mL | -4.667 | No | ns | G-AA |
| TNFa vs. Combo    | 250pg/mL vs. 500pg/mL | 11.67  | No | ns | G-AB |
| TNFa vs. Combo    | 250pg/mL vs. 1ng/mL   | 17     | No | ns | G-AC |
| TNFa vs. TNFa     | 500pg/mL vs. 1ng/mL   | 10.67  | No | ns | H-I  |
| TNFa vs. TNFa     | 500pg/mL vs. 2.5ng/mL | 24.67  | No | ns | H-J  |
| TNFa vs. TNFa     | 500pg/mL vs. 5ng/mL   | 27.67  | No | ns | H-K  |
| TNFa vs. TNFa     | 500pg/mL vs. 10ng/mL  | 30.67  | No | ns | H-L  |
| TNFa vs. Butyrate | 500pg/mL vs. 50µM     | -41.33 | No | ns | H-M  |
| TNFa vs. Butyrate | 500pg/mL vs. 75µM     | -40.67 | No | ns | H-N  |
| TNFa vs. Butyrate | 500pg/mL vs. 100µM    | -36.33 | No | ns | H-O  |
| TNFa vs. Butyrate | 500pg/mL vs. 250µM    | -47.67 | No | ns | H-P  |
| TNFa vs. Butyrate | 500pg/mL vs. 500µM    | -29.33 | No | ns | H-Q  |
| TNFa vs. Butyrate | 500pg/mL vs. 750µM    | -17.67 | No | ns | H-R  |
| TNFa vs. Butyrate | 500pg/mL vs. 1mM      | -6     | No | ns | H-S  |
| TNFa vs. Butyrate | 500pg/mL vs. 2.5mM    | 6.667  | No | ns | H-T  |

|                   |                       |        |    |    |      |
|-------------------|-----------------------|--------|----|----|------|
| TNFa vs. Butyrate | 500pg/mL vs. 5mM      | 11.67  | No | ns | H-U  |
| TNFa vs. Butyrate | 500pg/mL vs. 7.5mM    | 16.67  | No | ns | H-V  |
| TNFa vs. Butyrate | 500pg/mL vs. 10mM     | 21.67  | No | ns | H-W  |
| TNFa vs. Butyrate | 500pg/mL vs. 25mM     | 17.67  | No | ns | H-X  |
| TNFa vs. Combo    | 500pg/mL vs. 50pg/mL  | -32.33 | No | ns | H-Y  |
| TNFa vs. Combo    | 500pg/mL vs. 150pg/mL | -22.33 | No | ns | H-Z  |
| TNFa vs. Combo    | 500pg/mL vs. 250pg/mL | -18    | No | ns | H-AA |
| TNFa vs. Combo    | 500pg/mL vs. 500pg/mL | -1.667 | No | ns | H-AB |
| TNFa vs. Combo    | 500pg/mL vs. 1ng/mL   | 3.667  | No | ns | H-AC |
| TNFa vs. TNFa     | 1ng/mL vs. 2.5ng/mL   | 14     | No | ns | I-J  |
| TNFa vs. TNFa     | 1ng/mL vs. 5ng/mL     | 17     | No | ns | I-K  |
| TNFa vs. TNFa     | 1ng/mL vs. 10ng/mL    | 20     | No | ns | I-L  |
| TNFa vs. Butyrate | 1ng/mL vs. 50μM       | -52    | No | ns | I-M  |
| TNFa vs. Butyrate | 1ng/mL vs. 75μM       | -51.33 | No | ns | I-N  |
| TNFa vs. Butyrate | 1ng/mL vs. 100μM      | -47    | No | ns | I-O  |
| TNFa vs. Butyrate | 1ng/mL vs. 250μM      | -58.33 | No | ns | I-P  |
| TNFa vs. Butyrate | 1ng/mL vs. 500μM      | -40    | No | ns | I-Q  |
| TNFa vs. Butyrate | 1ng/mL vs. 750μM      | -28.33 | No | ns | I-R  |
| TNFa vs. Butyrate | 1ng/mL vs. 1mM        | -16.67 | No | ns | I-S  |
| TNFa vs. Butyrate | 1ng/mL vs. 2.5mM      | -4     | No | ns | I-T  |
| TNFa vs. Butyrate | 1ng/mL vs. 5mM        | 1      | No | ns | I-U  |
| TNFa vs. Butyrate | 1ng/mL vs. 7.5mM      | 6      | No | ns | I-V  |
| TNFa vs. Butyrate | 1ng/mL vs. 10mM       | 11     | No | ns | I-W  |
| TNFa vs. Butyrate | 1ng/mL vs. 25mM       | 7      | No | ns | I-X  |
| TNFa vs. Combo    | 1ng/mL vs. 50pg/mL    | -43    | No | ns | I-Y  |
| TNFa vs. Combo    | 1ng/mL vs. 150pg/mL   | -33    | No | ns | I-Z  |
| TNFa vs. Combo    | 1ng/mL vs. 250pg/mL   | -28.67 | No | ns | I-AA |
| TNFa vs. Combo    | 1ng/mL vs. 500pg/mL   | -12.33 | No | ns | I-AB |
| TNFa vs. Combo    | 1ng/mL vs. 1ng/mL     | -7     | No | ns | I-AC |
| TNFa vs. TNFa     | 2.5ng/mL vs. 5ng/mL   | 3      | No | ns | J-K  |
| TNFa vs. TNFa     | 2.5ng/mL vs. 10ng/mL  | 6      | No | ns | J-L  |
| TNFa vs. Butyrate | 2.5ng/mL vs. 50μM     | -66    | No | ns | J-M  |
| TNFa vs. Butyrate | 2.5ng/mL vs. 75μM     | -65.33 | No | ns | J-N  |
| TNFa vs. Butyrate | 2.5ng/mL vs. 100μM    | -61    | No | ns | J-O  |
| TNFa vs. Butyrate | 2.5ng/mL vs. 250μM    | -72.33 | No | ns | J-P  |
| TNFa vs. Butyrate | 2.5ng/mL vs. 500μM    | -54    | No | ns | J-Q  |
| TNFa vs. Butyrate | 2.5ng/mL vs. 750μM    | -42.33 | No | ns | J-R  |
| TNFa vs. Butyrate | 2.5ng/mL vs. 1mM      | -30.67 | No | ns | J-S  |
| TNFa vs. Butyrate | 2.5ng/mL vs. 2.5mM    | -18    | No | ns | J-T  |
| TNFa vs. Butyrate | 2.5ng/mL vs. 5mM      | -13    | No | ns | J-U  |
| TNFa vs. Butyrate | 2.5ng/mL vs. 7.5mM    | -8     | No | ns | J-V  |
| TNFa vs. Butyrate | 2.5ng/mL vs. 10mM     | -3     | No | ns | J-W  |
| TNFa vs. Butyrate | 2.5ng/mL vs. 25mM     | -7     | No | ns | J-X  |
| TNFa vs. Combo    | 2.5ng/mL vs. 50pg/mL  | -57    | No | ns | J-Y  |
| TNFa vs. Combo    | 2.5ng/mL vs. 150pg/mL | -47    | No | ns | J-Z  |
| TNFa vs. Combo    | 2.5ng/mL vs. 250pg/mL | -42.67 | No | ns | J-AA |
| TNFa vs. Combo    | 2.5ng/mL vs. 500pg/mL | -26.33 | No | ns | J-AB |

|                       |                      |           |    |      |
|-----------------------|----------------------|-----------|----|------|
| TNFa vs. Combo        | 2.5ng/mL vs. 1ng/mL  | -21 No    | ns | J-AC |
| TNFa vs. TNFa         | 5ng/mL vs. 10ng/mL   | 3 No      | ns | K-L  |
| TNFa vs. Butyrate     | 5ng/mL vs. 50μM      | -69 No    | ns | K-M  |
| TNFa vs. Butyrate     | 5ng/mL vs. 75μM      | -68.33 No | ns | K-N  |
| TNFa vs. Butyrate     | 5ng/mL vs. 100μM     | -64 No    | ns | K-O  |
| TNFa vs. Butyrate     | 5ng/mL vs. 250μM     | -75.33 No | ns | K-P  |
| TNFa vs. Butyrate     | 5ng/mL vs. 500μM     | -57 No    | ns | K-Q  |
| TNFa vs. Butyrate     | 5ng/mL vs. 750μM     | -45.33 No | ns | K-R  |
| TNFa vs. Butyrate     | 5ng/mL vs. 1mM       | -33.67 No | ns | K-S  |
| TNFa vs. Butyrate     | 5ng/mL vs. 2.5mM     | -21 No    | ns | K-T  |
| TNFa vs. Butyrate     | 5ng/mL vs. 5mM       | -16 No    | ns | K-U  |
| TNFa vs. Butyrate     | 5ng/mL vs. 7.5mM     | -11 No    | ns | K-V  |
| TNFa vs. Butyrate     | 5ng/mL vs. 10mM      | -6 No     | ns | K-W  |
| TNFa vs. Butyrate     | 5ng/mL vs. 25mM      | -10 No    | ns | K-X  |
| TNFa vs. Combo        | 5ng/mL vs. 50pg/mL   | -60 No    | ns | K-Y  |
| TNFa vs. Combo        | 5ng/mL vs. 150pg/mL  | -50 No    | ns | K-Z  |
| TNFa vs. Combo        | 5ng/mL vs. 250pg/mL  | -45.67 No | ns | K-AA |
| TNFa vs. Combo        | 5ng/mL vs. 500pg/mL  | -29.33 No | ns | K-AB |
| TNFa vs. Combo        | 5ng/mL vs. 1ng/mL    | -24 No    | ns | K-AC |
| TNFa vs. Butyrate     | 10ng/mL vs. 50μM     | -72 No    | ns | L-M  |
| TNFa vs. Butyrate     | 10ng/mL vs. 75μM     | -71.33 No | ns | L-N  |
| TNFa vs. Butyrate     | 10ng/mL vs. 100μM    | -67 No    | ns | L-O  |
| TNFa vs. Butyrate     | 10ng/mL vs. 250μM    | -78.33 No | ns | L-P  |
| TNFa vs. Butyrate     | 10ng/mL vs. 500μM    | -60 No    | ns | L-Q  |
| TNFa vs. Butyrate     | 10ng/mL vs. 750μM    | -48.33 No | ns | L-R  |
| TNFa vs. Butyrate     | 10ng/mL vs. 1mM      | -36.67 No | ns | L-S  |
| TNFa vs. Butyrate     | 10ng/mL vs. 2.5mM    | -24 No    | ns | L-T  |
| TNFa vs. Butyrate     | 10ng/mL vs. 5mM      | -19 No    | ns | L-U  |
| TNFa vs. Butyrate     | 10ng/mL vs. 7.5mM    | -14 No    | ns | L-V  |
| TNFa vs. Butyrate     | 10ng/mL vs. 10mM     | -9 No     | ns | L-W  |
| TNFa vs. Butyrate     | 10ng/mL vs. 25mM     | -13 No    | ns | L-X  |
| TNFa vs. Combo        | 10ng/mL vs. 50pg/mL  | -63 No    | ns | L-Y  |
| TNFa vs. Combo        | 10ng/mL vs. 150pg/mL | -53 No    | ns | L-Z  |
| TNFa vs. Combo        | 10ng/mL vs. 250pg/mL | -48.67 No | ns | L-AA |
| TNFa vs. Combo        | 10ng/mL vs. 500pg/mL | -32.33 No | ns | L-AB |
| TNFa vs. Combo        | 10ng/mL vs. 1ng/mL   | -27 No    | ns | L-AC |
| Butyrate vs. Butyrate | 50μM vs. 75μM        | 0.6667 No | ns | M-N  |
| Butyrate vs. Butyrate | 50μM vs. 100μM       | 5 No      | ns | M-O  |
| Butyrate vs. Butyrate | 50μM vs. 250μM       | -6.333 No | ns | M-P  |
| Butyrate vs. Butyrate | 50μM vs. 500μM       | 12 No     | ns | M-Q  |
| Butyrate vs. Butyrate | 50μM vs. 750μM       | 23.67 No  | ns | M-R  |
| Butyrate vs. Butyrate | 50μM vs. 1mM         | 35.33 No  | ns | M-S  |
| Butyrate vs. Butyrate | 50μM vs. 2.5mM       | 48 No     | ns | M-T  |
| Butyrate vs. Butyrate | 50μM vs. 5mM         | 53 No     | ns | M-U  |
| Butyrate vs. Butyrate | 50μM vs. 7.5mM       | 58 No     | ns | M-V  |
| Butyrate vs. Butyrate | 50μM vs. 10mM        | 63 No     | ns | M-W  |
| Butyrate vs. Butyrate | 50μM vs. 25mM        | 59 No     | ns | M-X  |

|                       |                    |           |    |      |
|-----------------------|--------------------|-----------|----|------|
| Butyrate vs. Combo    | 50µM vs. 50pg/mL   | 9 No      | ns | M-Y  |
| Butyrate vs. Combo    | 50µM vs. 150pg/mL  | 19 No     | ns | M-Z  |
| Butyrate vs. Combo    | 50µM vs. 250pg/mL  | 23.33 No  | ns | M-AA |
| Butyrate vs. Combo    | 50µM vs. 500pg/mL  | 39.67 No  | ns | M-AB |
| Butyrate vs. Combo    | 50µM vs. 1ng/mL    | 45 No     | ns | M-AC |
| Butyrate vs. Butyrate | 75µM vs. 100µM     | 4.333 No  | ns | N-O  |
| Butyrate vs. Butyrate | 75µM vs. 250µM     | -7 No     | ns | N-P  |
| Butyrate vs. Butyrate | 75µM vs. 500µM     | 11.33 No  | ns | N-Q  |
| Butyrate vs. Butyrate | 75µM vs. 750µM     | 23 No     | ns | N-R  |
| Butyrate vs. Butyrate | 75µM vs. 1mM       | 34.67 No  | ns | N-S  |
| Butyrate vs. Butyrate | 75µM vs. 2.5mM     | 47.33 No  | ns | N-T  |
| Butyrate vs. Butyrate | 75µM vs. 5mM       | 52.33 No  | ns | N-U  |
| Butyrate vs. Butyrate | 75µM vs. 7.5mM     | 57.33 No  | ns | N-V  |
| Butyrate vs. Butyrate | 75µM vs. 10mM      | 62.33 No  | ns | N-W  |
| Butyrate vs. Butyrate | 75µM vs. 25mM      | 58.33 No  | ns | N-X  |
| Butyrate vs. Combo    | 75µM vs. 50pg/mL   | 8.333 No  | ns | N-Y  |
| Butyrate vs. Combo    | 75µM vs. 150pg/mL  | 18.33 No  | ns | N-Z  |
| Butyrate vs. Combo    | 75µM vs. 250pg/mL  | 22.67 No  | ns | N-AA |
| Butyrate vs. Combo    | 75µM vs. 500pg/mL  | 39 No     | ns | N-AB |
| Butyrate vs. Combo    | 75µM vs. 1ng/mL    | 44.33 No  | ns | N-AC |
| Butyrate vs. Butyrate | 100µM vs. 250µM    | -11.33 No | ns | O-P  |
| Butyrate vs. Butyrate | 100µM vs. 500µM    | 7 No      | ns | O-Q  |
| Butyrate vs. Butyrate | 100µM vs. 750µM    | 18.67 No  | ns | O-R  |
| Butyrate vs. Butyrate | 100µM vs. 1mM      | 30.33 No  | ns | O-S  |
| Butyrate vs. Butyrate | 100µM vs. 2.5mM    | 43 No     | ns | O-T  |
| Butyrate vs. Butyrate | 100µM vs. 5mM      | 48 No     | ns | O-U  |
| Butyrate vs. Butyrate | 100µM vs. 7.5mM    | 53 No     | ns | O-V  |
| Butyrate vs. Butyrate | 100µM vs. 10mM     | 58 No     | ns | O-W  |
| Butyrate vs. Butyrate | 100µM vs. 25mM     | 54 No     | ns | O-X  |
| Butyrate vs. Combo    | 100µM vs. 50pg/mL  | 4 No      | ns | O-Y  |
| Butyrate vs. Combo    | 100µM vs. 150pg/mL | 14 No     | ns | O-Z  |
| Butyrate vs. Combo    | 100µM vs. 250pg/mL | 18.33 No  | ns | O-AA |
| Butyrate vs. Combo    | 100µM vs. 500pg/mL | 34.67 No  | ns | O-AB |
| Butyrate vs. Combo    | 100µM vs. 1ng/mL   | 40 No     | ns | O-AC |
| Butyrate vs. Butyrate | 250µM vs. 500µM    | 18.33 No  | ns | P-Q  |
| Butyrate vs. Butyrate | 250µM vs. 750µM    | 30 No     | ns | P-R  |
| Butyrate vs. Butyrate | 250µM vs. 1mM      | 41.67 No  | ns | P-S  |
| Butyrate vs. Butyrate | 250µM vs. 2.5mM    | 54.33 No  | ns | P-T  |
| Butyrate vs. Butyrate | 250µM vs. 5mM      | 59.33 No  | ns | P-U  |
| Butyrate vs. Butyrate | 250µM vs. 7.5mM    | 64.33 No  | ns | P-V  |
| Butyrate vs. Butyrate | 250µM vs. 10mM     | 69.33 No  | ns | P-W  |
| Butyrate vs. Butyrate | 250µM vs. 25mM     | 65.33 No  | ns | P-X  |
| Butyrate vs. Combo    | 250µM vs. 50pg/mL  | 15.33 No  | ns | P-Y  |
| Butyrate vs. Combo    | 250µM vs. 150pg/mL | 25.33 No  | ns | P-Z  |
| Butyrate vs. Combo    | 250µM vs. 250pg/mL | 29.67 No  | ns | P-AA |
| Butyrate vs. Combo    | 250µM vs. 500pg/mL | 46 No     | ns | P-AB |
| Butyrate vs. Combo    | 250µM vs. 1ng/mL   | 51.33 No  | ns | P-AC |

|                       |                    |         |    |    |      |
|-----------------------|--------------------|---------|----|----|------|
| Butyrate vs. Butyrate | 500µM vs. 750µM    | 11.67   | No | ns | Q-R  |
| Butyrate vs. Butyrate | 500µM vs. 1mM      | 23.33   | No | ns | Q-S  |
| Butyrate vs. Butyrate | 500µM vs. 2.5mM    | 36      | No | ns | Q-T  |
| Butyrate vs. Butyrate | 500µM vs. 5mM      | 41      | No | ns | Q-U  |
| Butyrate vs. Butyrate | 500µM vs. 7.5mM    | 46      | No | ns | Q-V  |
| Butyrate vs. Butyrate | 500µM vs. 10mM     | 51      | No | ns | Q-W  |
| Butyrate vs. Butyrate | 500µM vs. 25mM     | 47      | No | ns | Q-X  |
| Butyrate vs. Combo    | 500µM vs. 50pg/mL  | -3      | No | ns | Q-Y  |
| Butyrate vs. Combo    | 500µM vs. 150pg/mL | 7       | No | ns | Q-Z  |
| Butyrate vs. Combo    | 500µM vs. 250pg/mL | 11.33   | No | ns | Q-AA |
| Butyrate vs. Combo    | 500µM vs. 500pg/mL | 27.67   | No | ns | Q-AB |
| Butyrate vs. Combo    | 500µM vs. 1ng/mL   | 33      | No | ns | Q-AC |
| Butyrate vs. Butyrate | 750µM vs. 1mM      | 11.67   | No | ns | R-S  |
| Butyrate vs. Butyrate | 750µM vs. 2.5mM    | 24.33   | No | ns | R-T  |
| Butyrate vs. Butyrate | 750µM vs. 5mM      | 29.33   | No | ns | R-U  |
| Butyrate vs. Butyrate | 750µM vs. 7.5mM    | 34.33   | No | ns | R-V  |
| Butyrate vs. Butyrate | 750µM vs. 10mM     | 39.33   | No | ns | R-W  |
| Butyrate vs. Butyrate | 750µM vs. 25mM     | 35.33   | No | ns | R-X  |
| Butyrate vs. Combo    | 750µM vs. 50pg/mL  | -14.67  | No | ns | R-Y  |
| Butyrate vs. Combo    | 750µM vs. 150pg/mL | -4.667  | No | ns | R-Z  |
| Butyrate vs. Combo    | 750µM vs. 250pg/mL | -0.3333 | No | ns | R-AA |
| Butyrate vs. Combo    | 750µM vs. 500pg/mL | 16      | No | ns | R-AB |
| Butyrate vs. Combo    | 750µM vs. 1ng/mL   | 21.33   | No | ns | R-AC |
| Butyrate vs. Butyrate | 1mM vs. 2.5mM      | 12.67   | No | ns | S-T  |
| Butyrate vs. Butyrate | 1mM vs. 5mM        | 17.67   | No | ns | S-U  |
| Butyrate vs. Butyrate | 1mM vs. 7.5mM      | 22.67   | No | ns | S-V  |
| Butyrate vs. Butyrate | 1mM vs. 10mM       | 27.67   | No | ns | S-W  |
| Butyrate vs. Butyrate | 1mM vs. 25mM       | 23.67   | No | ns | S-X  |
| Butyrate vs. Combo    | 1mM vs. 50pg/mL    | -26.33  | No | ns | S-Y  |
| Butyrate vs. Combo    | 1mM vs. 150pg/mL   | -16.33  | No | ns | S-Z  |
| Butyrate vs. Combo    | 1mM vs. 250pg/mL   | -12     | No | ns | S-AA |
| Butyrate vs. Combo    | 1mM vs. 500pg/mL   | 4.333   | No | ns | S-AB |
| Butyrate vs. Combo    | 1mM vs. 1ng/mL     | 9.667   | No | ns | S-AC |
| Butyrate vs. Butyrate | 2.5mM vs. 5mM      | 5       | No | ns | T-U  |
| Butyrate vs. Butyrate | 2.5mM vs. 7.5mM    | 10      | No | ns | T-V  |
| Butyrate vs. Butyrate | 2.5mM vs. 10mM     | 15      | No | ns | T-W  |
| Butyrate vs. Butyrate | 2.5mM vs. 25mM     | 11      | No | ns | T-X  |
| Butyrate vs. Combo    | 2.5mM vs. 50pg/mL  | -39     | No | ns | T-Y  |
| Butyrate vs. Combo    | 2.5mM vs. 150pg/mL | -29     | No | ns | T-Z  |
| Butyrate vs. Combo    | 2.5mM vs. 250pg/mL | -24.67  | No | ns | T-AA |
| Butyrate vs. Combo    | 2.5mM vs. 500pg/mL | -8.333  | No | ns | T-AB |
| Butyrate vs. Combo    | 2.5mM vs. 1ng/mL   | -3      | No | ns | T-AC |
| Butyrate vs. Butyrate | 5mM vs. 7.5mM      | 5       | No | ns | U-V  |
| Butyrate vs. Butyrate | 5mM vs. 10mM       | 10      | No | ns | U-W  |
| Butyrate vs. Butyrate | 5mM vs. 25mM       | 6       | No | ns | U-X  |
| Butyrate vs. Combo    | 5mM vs. 50pg/mL    | -44     | No | ns | U-Y  |
| Butyrate vs. Combo    | 5mM vs. 150pg/mL   | -34     | No | ns | U-Z  |

|                       |                       |        |    |    |       |
|-----------------------|-----------------------|--------|----|----|-------|
| Butyrate vs. Combo    | 5mM vs. 250pg/mL      | -29.67 | No | ns | U-AA  |
| Butyrate vs. Combo    | 5mM vs. 500pg/mL      | -13.33 | No | ns | U-AB  |
| Butyrate vs. Combo    | 5mM vs. 1ng/mL        | -8     | No | ns | U-AC  |
| Butyrate vs. Butyrate | 7.5mM vs. 10mM        | 5      | No | ns | V-W   |
| Butyrate vs. Butyrate | 7.5mM vs. 25mM        | 1      | No | ns | V-X   |
| Butyrate vs. Combo    | 7.5mM vs. 50pg/mL     | -49    | No | ns | V-Y   |
| Butyrate vs. Combo    | 7.5mM vs. 150pg/mL    | -39    | No | ns | V-Z   |
| Butyrate vs. Combo    | 7.5mM vs. 250pg/mL    | -34.67 | No | ns | V-AA  |
| Butyrate vs. Combo    | 7.5mM vs. 500pg/mL    | -18.33 | No | ns | V-AB  |
| Butyrate vs. Combo    | 7.5mM vs. 1ng/mL      | -13    | No | ns | V-AC  |
| Butyrate vs. Butyrate | 10mM vs. 25mM         | -4     | No | ns | W-X   |
| Butyrate vs. Combo    | 10mM vs. 50pg/mL      | -54    | No | ns | W-Y   |
| Butyrate vs. Combo    | 10mM vs. 150pg/mL     | -44    | No | ns | W-Z   |
| Butyrate vs. Combo    | 10mM vs. 250pg/mL     | -39.67 | No | ns | W-AA  |
| Butyrate vs. Combo    | 10mM vs. 500pg/mL     | -23.33 | No | ns | W-AB  |
| Butyrate vs. Combo    | 10mM vs. 1ng/mL       | -18    | No | ns | W-AC  |
| Butyrate vs. Combo    | 25mM vs. 50pg/mL      | -50    | No | ns | X-Y   |
| Butyrate vs. Combo    | 25mM vs. 150pg/mL     | -40    | No | ns | X-Z   |
| Butyrate vs. Combo    | 25mM vs. 250pg/mL     | -35.67 | No | ns | X-AA  |
| Butyrate vs. Combo    | 25mM vs. 500pg/mL     | -19.33 | No | ns | X-AB  |
| Butyrate vs. Combo    | 25mM vs. 1ng/mL       | -14    | No | ns | X-AC  |
| Combo vs. Combo       | 50pg/mL vs. 150pg/mL  | 10     | No | ns | Y-Z   |
| Combo vs. Combo       | 50pg/mL vs. 250pg/mL  | 14.33  | No | ns | Y-AA  |
| Combo vs. Combo       | 50pg/mL vs. 500pg/mL  | 30.67  | No | ns | Y-AB  |
| Combo vs. Combo       | 50pg/mL vs. 1ng/mL    | 36     | No | ns | Y-AC  |
| Combo vs. Combo       | 150pg/mL vs. 250pg/mL | 4.333  | No | ns | Z-AA  |
| Combo vs. Combo       | 150pg/mL vs. 500pg/mL | 20.67  | No | ns | Z-AB  |
| Combo vs. Combo       | 150pg/mL vs. 1ng/mL   | 26     | No | ns | Z-AC  |
| Combo vs. Combo       | 250pg/mL vs. 500pg/mL | 16.33  | No | ns | AA-AB |
| Combo vs. Combo       | 250pg/mL vs. 1ng/mL   | 21.67  | No | ns | AA-AC |
| Combo vs. Combo       | 500pg/mL vs. 1ng/mL   | 5.333  | No | ns |       |

| Treatment          | Dunn's multiple comparisons test | Mean rank | Significant' | Summary | Adjusted P Value |
|--------------------|----------------------------------|-----------|--------------|---------|------------------|
| Media vs AA        | Media vs. 50µM AA                | 156.5     | Yes          | ****    | <0.0001 A-B      |
| Media vs TNF alpha | Media vs. 50pg/mL                | 17.33     | No           | ns      | >0.9999 A-C      |
| Media vs TNF alpha | Media vs. 100pg/mL               | 1.667     | No           | ns      | >0.9999 A-D      |
| Media vs TNF alpha | Media vs. 150pg/mL               | 13        | No           | ns      | >0.9999 A-E      |
| Media vs TNF alpha | Media vs. 200pg/mL               | -1.5      | No           | ns      | >0.9999 A-F      |
| Media vs TNF alpha | Media vs. 250pg/mL               | 65        | No           | ns      | >0.9999 A-G      |
| Media vs TNF alpha | Media vs. 500pg/mL               | 23.83     | No           | ns      | >0.9999 A-H      |
| Media vs TNF alpha | Media vs. 1000pg/mL              | 19.67     | No           | ns      | >0.9999 A-I      |
| Media vs TNF alpha | Media vs. 2500pg/mL              | 52.17     | No           | ns      | >0.9999 A-J      |
| Media vs TNF alpha | Media vs. 5000pg/mL              | 89.67     | No           | ns      | >0.9999 A-K      |
| Media vs butyrate  | Media vs. 50µM                   | 32        | No           | ns      | >0.9999 A-L      |
| Media vs butyrate  | Media vs. 75µM                   | 49.33     | No           | ns      | >0.9999 A-M      |
| Media vs butyrate  | Media vs. 100µM                  | 42.67     | No           | ns      | >0.9999 A-N      |
| Media vs butyrate  | Media vs. 250µM                  | 114.7     | No           | ns      | 0.06 A-O         |
| Media vs butyrate  | Media vs. 500µM                  | 60.17     | No           | ns      | >0.9999 A-P      |
| Media vs butyrate  | Media vs. 750µM                  | 36.83     | No           | ns      | >0.9999 A-Q      |
| Media vs butyrate  | Media vs. 1000µM                 | 88        | No           | ns      | >0.9999 A-R      |
| Media vs butyrate  | Media vs. 2500µM                 | 102.7     | No           | ns      | 0.2797 A-S       |
| Media vs butyrate  | Media vs. 5000µM                 | 95.33     | No           | ns      | 0.6654 A-T       |
| Media vs butyrate  | Media vs. 7500µM                 | 98.83     | No           | ns      | 0.4431 A-U       |
| Media vs Combo     | Media vs. 50pg/mL                | 62.67     | No           | ns      | >0.9999 A-V      |
| Media vs Combo     | Media vs. 100pg/mL               | 131.2     | Yes          | **      | 0.0057 A-W       |
| Media vs Combo     | Media vs. 150pg/mL               | 77.17     | No           | ns      | >0.9999 A-X      |
| Media vs Combo     | Media vs. 200pg/mL               | 49.67     | No           | ns      | >0.9999 A-Y      |
| Media vs Combo     | Media vs. 250pg/mL               | 94.67     | No           | ns      | 0.718 A-Z        |
| Media vs Combo     | Media vs. 500pg/mL               | 107.8     | No           | ns      | 0.1469 A-AA      |
| Media vs Combo     | Media vs. 1000pg/mL              | 127.8     | Yes          | **      | 0.0093 A-AB      |
| Media vs Combo     | Media vs. 2500pg/mL              | 145.7     | Yes          | ***     | 0.0006 A-AC      |
| Media vs Combo     | Media vs. 5000pg/mL              | 150.5     | Yes          | ***     | 0.0002 A-AD      |
| AA vs TNF alpha    | 50µM AA vs. 50pg/mL              | -139.2    | Yes          | **      | 0.0016 B-C       |
| AA vs TNF alpha    | 50µM AA vs. 100pg/mL             | -154.8    | Yes          | ***     | 0.0001 B-D       |
| AA vs TNF alpha    | 50µM AA vs. 150pg/mL             | -143.5    | Yes          | ***     | 0.0008 B-E       |
| AA vs TNF alpha    | 50µM AA vs. 200pg/mL             | -158      | Yes          | ****    | <0.0001 B-F      |
| AA vs TNF alpha    | 50µM AA vs. 250pg/mL             | -91.5     | No           | ns      | >0.9999 B-G      |
| AA vs TNF alpha    | 50µM AA vs. 500pg/mL             | -132.7    | Yes          | **      | 0.0045 B-H       |
| AA vs TNF alpha    | 50µM AA vs. 1000pg/mL            | -136.8    | Yes          | **      | 0.0024 B-I       |
| AA vs TNF alpha    | 50µM AA vs. 2500pg/mL            | -104.3    | No           | ns      | 0.228 B-J        |
| AA vs TNF alpha    | 50µM AA vs. 5000pg/mL            | -66.83    | No           | ns      | >0.9999 B-K      |
| AA vs butyrate     | 50µM AA vs. 50µM                 | -124.5    | Yes          | *       | 0.0152 B-L       |
| AA vs butyrate     | 50µM AA vs. 75µM                 | -107.2    | No           | ns      | 0.1599 B-M       |
| AA vs butyrate     | 50µM AA vs. 100µM                | -113.8    | No           | ns      | 0.0671 B-N       |
| AA vs butyrate     | 50µM AA vs. 250µM                | -41.83    | No           | ns      | >0.9999 B-O      |
| AA vs butyrate     | 50µM AA vs. 500µM                | -96.33    | No           | ns      | 0.5932 B-P       |
| AA vs butyrate     | 50µM AA vs. 750µM                | -119.7    | Yes          | *       | 0.0302 B-Q       |
| AA vs butyrate     | 50µM AA vs. 1000µM               | -68.5     | No           | ns      | >0.9999 B-R      |
| AA vs butyrate     | 50µM AA vs. 2500µM               | -53.83    | No           | ns      | >0.9999 B-S      |

|                   |                        |        |     |    |         |      |
|-------------------|------------------------|--------|-----|----|---------|------|
| AA vs butyrate    | 50μM AA vs. 5000μM     | -61.17 | No  | ns | >0.9999 | B-T  |
| AA vs butyrate    | 50μM AA vs. 7500μM     | -57.67 | No  | ns | >0.9999 | B-U  |
| AA vs. Combo      | 50μM AA vs. 50pg/mL    | -93.83 | No  | ns | 0.789   | B-V  |
| AA vs. Combo      | 50μM AA vs. 100pg/mL   | -25.33 | No  | ns | >0.9999 | B-W  |
| AA vs. Combo      | 50μM AA vs. 150pg/mL   | -79.33 | No  | ns | >0.9999 | B-X  |
| AA vs. Combo      | 50μM AA vs. 200pg/mL   | -106.8 | No  | ns | 0.1668  | B-Y  |
| AA vs. Combo      | 50μM AA vs. 250pg/mL   | -61.83 | No  | ns | >0.9999 | B-Z  |
| AA vs. Combo      | 50μM AA vs. 500pg/mL   | -48.67 | No  | ns | >0.9999 | B-AA |
| AA vs. Combo      | 50μM AA vs. 1000pg/mL  | -28.67 | No  | ns | >0.9999 | B-AB |
| AA vs. Combo      | 50μM AA vs. 2500pg/mL  | -10.83 | No  | ns | >0.9999 | B-AC |
| AA vs. Combo      | 50μM AA vs. 5000pg/mL  | -6     | No  | ns | >0.9999 | B-AD |
| TNFa vs. TNFa     | 50pg/mL vs. 100pg/mL   | -15.67 | No  | ns | >0.9999 | C-D  |
| TNFa vs. TNFa     | 50pg/mL vs. 150pg/mL   | -4.333 | No  | ns | >0.9999 | C-E  |
| TNFa vs. TNFa     | 50pg/mL vs. 200pg/mL   | -18.83 | No  | ns | >0.9999 | C-F  |
| TNFa vs. TNFa     | 50pg/mL vs. 250pg/mL   | 47.67  | No  | ns | >0.9999 | C-G  |
| TNFa vs. TNFa     | 50pg/mL vs. 500pg/mL   | 6.5    | No  | ns | >0.9999 | C-H  |
| TNFa vs. TNFa     | 50pg/mL vs. 1000pg/mL  | 2.333  | No  | ns | >0.9999 | C-I  |
| TNFa vs. TNFa     | 50pg/mL vs. 2500pg/mL  | 34.83  | No  | ns | >0.9999 | C-J  |
| TNFa vs. TNFa     | 50pg/mL vs. 5000pg/mL  | 72.33  | No  | ns | >0.9999 | C-K  |
| TNFa vs. Butyrate | 50pg/mL vs. 50μM       | 14.67  | No  | ns | >0.9999 | C-L  |
| TNFa vs. Butyrate | 50pg/mL vs. 75μM       | 32     | No  | ns | >0.9999 | C-M  |
| TNFa vs. Butyrate | 50pg/mL vs. 100μM      | 25.33  | No  | ns | >0.9999 | C-N  |
| TNFa vs. Butyrate | 50pg/mL vs. 250μM      | 97.33  | No  | ns | 0.5283  | C-O  |
| TNFa vs. Butyrate | 50pg/mL vs. 500μM      | 42.83  | No  | ns | >0.9999 | C-P  |
| TNFa vs. Butyrate | 50pg/mL vs. 750μM      | 19.5   | No  | ns | >0.9999 | C-Q  |
| TNFa vs. Butyrate | 50pg/mL vs. 1000μM     | 70.67  | No  | ns | >0.9999 | C-R  |
| TNFa vs. Butyrate | 50pg/mL vs. 2500μM     | 85.33  | No  | ns | >0.9999 | C-S  |
| TNFa vs. Butyrate | 50pg/mL vs. 5000μM     | 78     | No  | ns | >0.9999 | C-T  |
| TNFa vs. Butyrate | 50pg/mL vs. 7500μM     | 81.5   | No  | ns | >0.9999 | C-U  |
| TNFa vs. Combo    | 50pg/mL vs. 50pg/mL    | 45.33  | No  | ns | >0.9999 | C-V  |
| TNFa vs. Combo    | 50pg/mL vs. 100pg/mL   | 113.8  | No  | ns | 0.0671  | C-W  |
| TNFa vs. Combo    | 50pg/mL vs. 150pg/mL   | 59.83  | No  | ns | >0.9999 | C-X  |
| TNFa vs. Combo    | 50pg/mL vs. 200pg/mL   | 32.33  | No  | ns | >0.9999 | C-Y  |
| TNFa vs. Combo    | 50pg/mL vs. 250pg/mL   | 77.33  | No  | ns | >0.9999 | C-Z  |
| TNFa vs. Combo    | 50pg/mL vs. 500pg/mL   | 90.5   | No  | ns | >0.9999 | C-AA |
| TNFa vs. Combo    | 50pg/mL vs. 1000pg/mL  | 110.5  | No  | ns | 0.1042  | C-AB |
| TNFa vs. Combo    | 50pg/mL vs. 2500pg/mL  | 128.3  | Yes | ** | 0.0087  | C-AC |
| TNFa vs. Combo    | 50pg/mL vs. 5000pg/mL  | 133.2  | Yes | ** | 0.0042  | C-AD |
| TNFa vs. TNFa     | 100pg/mL vs. 150pg/mL  | 11.33  | No  | ns | >0.9999 | D-E  |
| TNFa vs. TNFa     | 100pg/mL vs. 200pg/mL  | -3.167 | No  | ns | >0.9999 | D-F  |
| TNFa vs. TNFa     | 100pg/mL vs. 250pg/mL  | 63.33  | No  | ns | >0.9999 | D-G  |
| TNFa vs. TNFa     | 100pg/mL vs. 500pg/mL  | 22.17  | No  | ns | >0.9999 | D-H  |
| TNFa vs. TNFa     | 100pg/mL vs. 1000pg/mL | 18     | No  | ns | >0.9999 | D-I  |
| TNFa vs. TNFa     | 100pg/mL vs. 2500pg/mL | 50.5   | No  | ns | >0.9999 | D-J  |
| TNFa vs. TNFa     | 100pg/mL vs. 5000pg/mL | 88     | No  | ns | >0.9999 | D-K  |
| TNFa vs. Butyrate | 100pg/mL vs. 50μM      | 30.33  | No  | ns | >0.9999 | D-L  |
| TNFa vs. Butyrate | 100pg/mL vs. 75μM      | 47.67  | No  | ns | >0.9999 | D-M  |

|                   |                        |           |     |         |      |
|-------------------|------------------------|-----------|-----|---------|------|
| TNFa vs. Butyrate | 100pg/mL vs. 100µM     | 41 No     | ns  | >0.9999 | D-N  |
| TNFa vs. Butyrate | 100pg/mL vs. 250µM     | 113 No    | ns  | 0.075   | D-O  |
| TNFa vs. Butyrate | 100pg/mL vs. 500µM     | 58.5 No   | ns  | >0.9999 | D-P  |
| TNFa vs. Butyrate | 100pg/mL vs. 750µM     | 35.17 No  | ns  | >0.9999 | D-Q  |
| TNFa vs. Butyrate | 100pg/mL vs. 1000µM    | 86.33 No  | ns  | >0.9999 | D-R  |
| TNFa vs. Butyrate | 100pg/mL vs. 2500µM    | 101 No    | ns  | 0.3423  | D-S  |
| TNFa vs. Butyrate | 100pg/mL vs. 5000µM    | 93.67 No  | ns  | 0.804   | D-T  |
| TNFa vs. Butyrate | 100pg/mL vs. 7500µM    | 97.17 No  | ns  | 0.5386  | D-U  |
| TNFa vs. Combo    | 100pg/mL vs. 50pg/mL   | 61 No     | ns  | >0.9999 | D-V  |
| TNFa vs. Combo    | 100pg/mL vs. 100pg/mL  | 129.5 Yes | **  | 0.0073  | D-W  |
| TNFa vs. Combo    | 100pg/mL vs. 150pg/mL  | 75.5 No   | ns  | >0.9999 | D-X  |
| TNFa vs. Combo    | 100pg/mL vs. 200pg/mL  | 48 No     | ns  | >0.9999 | D-Y  |
| TNFa vs. Combo    | 100pg/mL vs. 250pg/mL  | 93 No     | ns  | 0.8665  | D-Z  |
| TNFa vs. Combo    | 100pg/mL vs. 500pg/mL  | 106.2 No  | ns  | 0.1814  | D-AA |
| TNFa vs. Combo    | 100pg/mL vs. 1000pg/mL | 126.2 Yes | *   | 0.0119  | D-AB |
| TNFa vs. Combo    | 100pg/mL vs. 2500pg/mL | 144 Yes   | *** | 0.0007  | D-AC |
| TNFa vs. Combo    | 100pg/mL vs. 5000pg/mL | 148.8 Yes | *** | 0.0003  | D-AD |
| TNFa vs. TNFa     | 150pg/mL vs. 200pg/mL  | -14.5 No  | ns  | >0.9999 | E-F  |
| TNFa vs. TNFa     | 150pg/mL vs. 250pg/mL  | 52 No     | ns  | >0.9999 | E-G  |
| TNFa vs. TNFa     | 150pg/mL vs. 500pg/mL  | 10.83 No  | ns  | >0.9999 | E-H  |
| TNFa vs. TNFa     | 150pg/mL vs. 1000pg/mL | 6.667 No  | ns  | >0.9999 | E-I  |
| TNFa vs. TNFa     | 150pg/mL vs. 2500pg/mL | 39.17 No  | ns  | >0.9999 | E-J  |
| TNFa vs. TNFa     | 150pg/mL vs. 5000pg/mL | 76.67 No  | ns  | >0.9999 | E-K  |
| TNFa vs. Butyrate | 150pg/mL vs. 50µM      | 19 No     | ns  | >0.9999 | E-L  |
| TNFa vs. Butyrate | 150pg/mL vs. 75µM      | 36.33 No  | ns  | >0.9999 | E-M  |
| TNFa vs. Butyrate | 150pg/mL vs. 100µM     | 29.67 No  | ns  | >0.9999 | E-N  |
| TNFa vs. Butyrate | 150pg/mL vs. 250µM     | 101.7 No  | ns  | 0.3159  | E-O  |
| TNFa vs. Butyrate | 150pg/mL vs. 500µM     | 47.17 No  | ns  | >0.9999 | E-P  |
| TNFa vs. Butyrate | 150pg/mL vs. 750µM     | 23.83 No  | ns  | >0.9999 | E-Q  |
| TNFa vs. Butyrate | 150pg/mL vs. 1000µM    | 75 No     | ns  | >0.9999 | E-R  |
| TNFa vs. Butyrate | 150pg/mL vs. 2500µM    | 89.67 No  | ns  | >0.9999 | E-S  |
| TNFa vs. Butyrate | 150pg/mL vs. 5000µM    | 82.33 No  | ns  | >0.9999 | E-T  |
| TNFa vs. Butyrate | 150pg/mL vs. 7500µM    | 85.83 No  | ns  | >0.9999 | E-U  |
| TNFa vs. Combo    | 150pg/mL vs. 50pg/mL   | 49.67 No  | ns  | >0.9999 | E-V  |
| TNFa vs. Combo    | 150pg/mL vs. 100pg/mL  | 118.2 Yes | *   | 0.0373  | E-W  |
| TNFa vs. Combo    | 150pg/mL vs. 150pg/mL  | 64.17 No  | ns  | >0.9999 | E-X  |
| TNFa vs. Combo    | 150pg/mL vs. 200pg/mL  | 36.67 No  | ns  | >0.9999 | E-Y  |
| TNFa vs. Combo    | 150pg/mL vs. 250pg/mL  | 81.67 No  | ns  | >0.9999 | E-Z  |
| TNFa vs. Combo    | 150pg/mL vs. 500pg/mL  | 94.83 No  | ns  | 0.7045  | E-AA |
| TNFa vs. Combo    | 150pg/mL vs. 1000pg/mL | 114.8 No  | ns  | 0.0587  | E-AB |
| TNFa vs. Combo    | 150pg/mL vs. 2500pg/mL | 132.7 Yes | **  | 0.0045  | E-AC |
| TNFa vs. Combo    | 150pg/mL vs. 5000pg/mL | 137.5 Yes | **  | 0.0021  | E-AD |
| TNFa vs. TNFa     | 200pg/mL vs. 250pg/mL  | 66.5 No   | ns  | >0.9999 | F-G  |
| TNFa vs. TNFa     | 200pg/mL vs. 500pg/mL  | 25.33 No  | ns  | >0.9999 | F-H  |
| TNFa vs. TNFa     | 200pg/mL vs. 1000pg/mL | 21.17 No  | ns  | >0.9999 | F-I  |
| TNFa vs. TNFa     | 200pg/mL vs. 2500pg/mL | 53.67 No  | ns  | >0.9999 | F-J  |
| TNFa vs. TNFa     | 200pg/mL vs. 5000pg/mL | 91.17 No  | ns  | >0.9999 | F-K  |

|                   |                        |           |     |         |      |
|-------------------|------------------------|-----------|-----|---------|------|
| TNFa vs. Butyrate | 200pg/mL vs. 50µM      | 33.5 No   | ns  | >0.9999 | F-L  |
| TNFa vs. Butyrate | 200pg/mL vs. 75µM      | 50.83 No  | ns  | >0.9999 | F-M  |
| TNFa vs. Butyrate | 200pg/mL vs. 100µM     | 44.17 No  | ns  | >0.9999 | F-N  |
| TNFa vs. Butyrate | 200pg/mL vs. 250µM     | 116.2 Yes | *   | 0.049   | F-O  |
| TNFa vs. Butyrate | 200pg/mL vs. 500µM     | 61.67 No  | ns  | >0.9999 | F-P  |
| TNFa vs. Butyrate | 200pg/mL vs. 750µM     | 38.33 No  | ns  | >0.9999 | F-Q  |
| TNFa vs. Butyrate | 200pg/mL vs. 1000µM    | 89.5 No   | ns  | >0.9999 | F-R  |
| TNFa vs. Butyrate | 200pg/mL vs. 2500µM    | 104.2 No  | ns  | 0.2327  | F-S  |
| TNFa vs. Butyrate | 200pg/mL vs. 5000µM    | 96.83 No  | ns  | 0.5599  | F-T  |
| TNFa vs. Butyrate | 200pg/mL vs. 7500µM    | 100.3 No  | ns  | 0.3708  | F-U  |
| TNFa vs. Combo    | 200pg/mL vs. 50pg/mL   | 64.17 No  | ns  | >0.9999 | F-V  |
| TNFa vs. Combo    | 200pg/mL vs. 100pg/mL  | 132.7 Yes | **  | 0.0045  | F-W  |
| TNFa vs. Combo    | 200pg/mL vs. 150pg/mL  | 78.67 No  | ns  | >0.9999 | F-X  |
| TNFa vs. Combo    | 200pg/mL vs. 200pg/mL  | 51.17 No  | ns  | >0.9999 | F-Y  |
| TNFa vs. Combo    | 200pg/mL vs. 250pg/mL  | 96.17 No  | ns  | 0.6047  | F-Z  |
| TNFa vs. Combo    | 200pg/mL vs. 500pg/mL  | 109.3 No  | ns  | 0.1212  | F-AA |
| TNFa vs. Combo    | 200pg/mL vs. 1000pg/mL | 129.3 Yes | **  | 0.0075  | F-AB |
| TNFa vs. Combo    | 200pg/mL vs. 2500pg/mL | 147.2 Yes | *** | 0.0004  | F-AC |
| TNFa vs. Combo    | 200pg/mL vs. 5000pg/mL | 152 Yes   | *** | 0.0002  | F-AD |
| TNFa vs. TNFa     | 250pg/mL vs. 500pg/mL  | -41.17 No | ns  | >0.9999 | G-H  |
| TNFa vs. TNFa     | 250pg/mL vs. 1000pg/mL | -45.33 No | ns  | >0.9999 | G-I  |
| TNFa vs. TNFa     | 250pg/mL vs. 2500pg/mL | -12.83 No | ns  | >0.9999 | G-J  |
| TNFa vs. TNFa     | 250pg/mL vs. 5000pg/mL | 24.67 No  | ns  | >0.9999 | G-K  |
| TNFa vs. Butyrate | 250pg/mL vs. 50µM      | -33 No    | ns  | >0.9999 | G-L  |
| TNFa vs. Butyrate | 250pg/mL vs. 75µM      | -15.67 No | ns  | >0.9999 | G-M  |
| TNFa vs. Butyrate | 250pg/mL vs. 100µM     | -22.33 No | ns  | >0.9999 | G-N  |
| TNFa vs. Butyrate | 250pg/mL vs. 250µM     | 49.67 No  | ns  | >0.9999 | G-O  |
| TNFa vs. Butyrate | 250pg/mL vs. 500µM     | -4.833 No | ns  | >0.9999 | G-P  |
| TNFa vs. Butyrate | 250pg/mL vs. 750µM     | -28.17 No | ns  | >0.9999 | G-Q  |
| TNFa vs. Butyrate | 250pg/mL vs. 1000µM    | 23 No     | ns  | >0.9999 | G-R  |
| TNFa vs. Butyrate | 250pg/mL vs. 2500µM    | 37.67 No  | ns  | >0.9999 | G-S  |
| TNFa vs. Butyrate | 250pg/mL vs. 5000µM    | 30.33 No  | ns  | >0.9999 | G-T  |
| TNFa vs. Butyrate | 250pg/mL vs. 7500µM    | 33.83 No  | ns  | >0.9999 | G-U  |
| TNFa vs. Combo    | 250pg/mL vs. 50pg/mL   | -2.333 No | ns  | >0.9999 | G-V  |
| TNFa vs. Combo    | 250pg/mL vs. 100pg/mL  | 66.17 No  | ns  | >0.9999 | G-W  |
| TNFa vs. Combo    | 250pg/mL vs. 150pg/mL  | 12.17 No  | ns  | >0.9999 | G-X  |
| TNFa vs. Combo    | 250pg/mL vs. 200pg/mL  | -15.33 No | ns  | >0.9999 | G-Y  |
| TNFa vs. Combo    | 250pg/mL vs. 250pg/mL  | 29.67 No  | ns  | >0.9999 | G-Z  |
| TNFa vs. Combo    | 250pg/mL vs. 500pg/mL  | 42.83 No  | ns  | >0.9999 | G-AA |
| TNFa vs. Combo    | 250pg/mL vs. 1000pg/mL | 62.83 No  | ns  | >0.9999 | G-AB |
| TNFa vs. Combo    | 250pg/mL vs. 2500pg/mL | 80.67 No  | ns  | >0.9999 | G-AC |
| TNFa vs. Combo    | 250pg/mL vs. 5000pg/mL | 85.5 No   | ns  | >0.9999 | G-AD |
| TNFa vs. TNFa     | 500pg/mL vs. 1000pg/mL | -4.167 No | ns  | >0.9999 | H-I  |
| TNFa vs. TNFa     | 500pg/mL vs. 2500pg/mL | 28.33 No  | ns  | >0.9999 | H-J  |
| TNFa vs. TNFa     | 500pg/mL vs. 5000pg/mL | 65.83 No  | ns  | >0.9999 | H-K  |
| TNFa vs. Butyrate | 500pg/mL vs. 50µM      | 8.167 No  | ns  | >0.9999 | H-L  |
| TNFa vs. Butyrate | 500pg/mL vs. 75µM      | 25.5 No   | ns  | >0.9999 | H-M  |

|                   |                         |        |     |    |         |      |
|-------------------|-------------------------|--------|-----|----|---------|------|
| TNFa vs. Butyrate | 500pg/mL vs. 100µM      | 18.83  | No  | ns | >0.9999 | H-N  |
| TNFa vs. Butyrate | 500pg/mL vs. 250µM      | 90.83  | No  | ns | >0.9999 | H-O  |
| TNFa vs. Butyrate | 500pg/mL vs. 500µM      | 36.33  | No  | ns | >0.9999 | H-P  |
| TNFa vs. Butyrate | 500pg/mL vs. 750µM      | 13     | No  | ns | >0.9999 | H-Q  |
| TNFa vs. Butyrate | 500pg/mL vs. 1000µM     | 64.17  | No  | ns | >0.9999 | H-R  |
| TNFa vs. Butyrate | 500pg/mL vs. 2500µM     | 78.83  | No  | ns | >0.9999 | H-S  |
| TNFa vs. Butyrate | 500pg/mL vs. 5000µM     | 71.5   | No  | ns | >0.9999 | H-T  |
| TNFa vs. Butyrate | 500pg/mL vs. 7500µM     | 75     | No  | ns | >0.9999 | H-U  |
| TNFa vs. Combo    | 500pg/mL vs. 50pg/mL    | 38.83  | No  | ns | >0.9999 | H-V  |
| TNFa vs. Combo    | 500pg/mL vs. 100pg/mL   | 107.3  | No  | ns | 0.1565  | H-W  |
| TNFa vs. Combo    | 500pg/mL vs. 150pg/mL   | 53.33  | No  | ns | >0.9999 | H-X  |
| TNFa vs. Combo    | 500pg/mL vs. 200pg/mL   | 25.83  | No  | ns | >0.9999 | H-Y  |
| TNFa vs. Combo    | 500pg/mL vs. 250pg/mL   | 70.83  | No  | ns | >0.9999 | H-Z  |
| TNFa vs. Combo    | 500pg/mL vs. 500pg/mL   | 84     | No  | ns | >0.9999 | H-AA |
| TNFa vs. Combo    | 500pg/mL vs. 1000pg/mL  | 104    | No  | ns | 0.2375  | H-AB |
| TNFa vs. Combo    | 500pg/mL vs. 2500pg/mL  | 121.8  | Yes | *  | 0.0223  | H-AC |
| TNFa vs. Combo    | 500pg/mL vs. 5000pg/mL  | 126.7  | Yes | *  | 0.0111  | H-AD |
| TNFa vs. TNFa     | 1000pg/mL vs. 2500pg/mL | 32.5   | No  | ns | >0.9999 | I-J  |
| TNFa vs. TNFa     | 1000pg/mL vs. 5000pg/mL | 70     | No  | ns | >0.9999 | I-K  |
| TNFa vs. Butyrate | 1000pg/mL vs. 50µM      | 12.33  | No  | ns | >0.9999 | I-L  |
| TNFa vs. Butyrate | 1000pg/mL vs. 75µM      | 29.67  | No  | ns | >0.9999 | I-M  |
| TNFa vs. Butyrate | 1000pg/mL vs. 100µM     | 23     | No  | ns | >0.9999 | I-N  |
| TNFa vs. Butyrate | 1000pg/mL vs. 250µM     | 95     | No  | ns | 0.6912  | I-O  |
| TNFa vs. Butyrate | 1000pg/mL vs. 500µM     | 40.5   | No  | ns | >0.9999 | I-P  |
| TNFa vs. Butyrate | 1000pg/mL vs. 750µM     | 17.17  | No  | ns | >0.9999 | I-Q  |
| TNFa vs. Butyrate | 1000pg/mL vs. 1000µM    | 68.33  | No  | ns | >0.9999 | I-R  |
| TNFa vs. Butyrate | 1000pg/mL vs. 2500µM    | 83     | No  | ns | >0.9999 | I-S  |
| TNFa vs. Butyrate | 1000pg/mL vs. 5000µM    | 75.67  | No  | ns | >0.9999 | I-T  |
| TNFa vs. Butyrate | 1000pg/mL vs. 7500µM    | 79.17  | No  | ns | >0.9999 | I-U  |
| TNFa vs. Combo    | 1000pg/mL vs. 50pg/mL   | 43     | No  | ns | >0.9999 | I-V  |
| TNFa vs. Combo    | 1000pg/mL vs. 100pg/mL  | 111.5  | No  | ns | 0.0915  | I-W  |
| TNFa vs. Combo    | 1000pg/mL vs. 150pg/mL  | 57.5   | No  | ns | >0.9999 | I-X  |
| TNFa vs. Combo    | 1000pg/mL vs. 200pg/mL  | 30     | No  | ns | >0.9999 | I-Y  |
| TNFa vs. Combo    | 1000pg/mL vs. 250pg/mL  | 75     | No  | ns | >0.9999 | I-Z  |
| TNFa vs. Combo    | 1000pg/mL vs. 500pg/mL  | 88.17  | No  | ns | >0.9999 | I-AA |
| TNFa vs. Combo    | 1000pg/mL vs. 1000pg/mL | 108.2  | No  | ns | 0.1408  | I-AB |
| TNFa vs. Combo    | 1000pg/mL vs. 2500pg/mL | 126    | Yes | *  | 0.0122  | I-AC |
| TNFa vs. Combo    | 1000pg/mL vs. 5000pg/mL | 130.8  | Yes | ** | 0.0059  | I-AD |
| TNFa vs. TNFa     | 2500pg/mL vs. 5000pg/mL | 37.5   | No  | ns | >0.9999 | J-K  |
| TNFa vs. Butyrate | 2500pg/mL vs. 50µM      | -20.17 | No  | ns | >0.9999 | J-L  |
| TNFa vs. Butyrate | 2500pg/mL vs. 75µM      | -2.833 | No  | ns | >0.9999 | J-M  |
| TNFa vs. Butyrate | 2500pg/mL vs. 100µM     | -9.5   | No  | ns | >0.9999 | J-N  |
| TNFa vs. Butyrate | 2500pg/mL vs. 250µM     | 62.5   | No  | ns | >0.9999 | J-O  |
| TNFa vs. Butyrate | 2500pg/mL vs. 500µM     | 8      | No  | ns | >0.9999 | J-P  |
| TNFa vs. Butyrate | 2500pg/mL vs. 750µM     | -15.33 | No  | ns | >0.9999 | J-Q  |
| TNFa vs. Butyrate | 2500pg/mL vs. 1000µM    | 35.83  | No  | ns | >0.9999 | J-R  |
| TNFa vs. Butyrate | 2500pg/mL vs. 2500µM    | 50.5   | No  | ns | >0.9999 | J-S  |

|                       |                         |        |    |    |         |      |
|-----------------------|-------------------------|--------|----|----|---------|------|
| TNFa vs. Butyrate     | 2500pg/mL vs. 5000µM    | 43.17  | No | ns | >0.9999 | J-T  |
| TNFa vs. Butyrate     | 2500pg/mL vs. 7500µM    | 46.67  | No | ns | >0.9999 | J-U  |
| TNFa vs. Combo        | 2500pg/mL vs. 50pg/mL   | 10.5   | No | ns | >0.9999 | J-V  |
| TNFa vs. Combo        | 2500pg/mL vs. 100pg/mL  | 79     | No | ns | >0.9999 | J-W  |
| TNFa vs. Combo        | 2500pg/mL vs. 150pg/mL  | 25     | No | ns | >0.9999 | J-X  |
| TNFa vs. Combo        | 2500pg/mL vs. 200pg/mL  | -2.5   | No | ns | >0.9999 | J-Y  |
| TNFa vs. Combo        | 2500pg/mL vs. 250pg/mL  | 42.5   | No | ns | >0.9999 | J-Z  |
| TNFa vs. Combo        | 2500pg/mL vs. 500pg/mL  | 55.67  | No | ns | >0.9999 | J-AA |
| TNFa vs. Combo        | 2500pg/mL vs. 1000pg/mL | 75.67  | No | ns | >0.9999 | J-AB |
| TNFa vs. Combo        | 2500pg/mL vs. 2500pg/mL | 93.5   | No | ns | 0.8192  | J-AC |
| TNFa vs. Combo        | 2500pg/mL vs. 5000pg/mL | 98.33  | No | ns | 0.47    | J-AD |
| TNFa vs. Butyrate     | 5000pg/mL vs. 50µM      | -57.67 | No | ns | >0.9999 | K-L  |
| TNFa vs. Butyrate     | 5000pg/mL vs. 75µM      | -40.33 | No | ns | >0.9999 | K-M  |
| TNFa vs. Butyrate     | 5000pg/mL vs. 100µM     | -47    | No | ns | >0.9999 | K-N  |
| TNFa vs. Butyrate     | 5000pg/mL vs. 250µM     | 25     | No | ns | >0.9999 | K-O  |
| TNFa vs. Butyrate     | 5000pg/mL vs. 500µM     | -29.5  | No | ns | >0.9999 | K-P  |
| TNFa vs. Butyrate     | 5000pg/mL vs. 750µM     | -52.83 | No | ns | >0.9999 | K-Q  |
| TNFa vs. Butyrate     | 5000pg/mL vs. 1000µM    | -1.667 | No | ns | >0.9999 | K-R  |
| TNFa vs. Butyrate     | 5000pg/mL vs. 2500µM    | 13     | No | ns | >0.9999 | K-S  |
| TNFa vs. Butyrate     | 5000pg/mL vs. 5000µM    | 5.667  | No | ns | >0.9999 | K-T  |
| TNFa vs. Butyrate     | 5000pg/mL vs. 7500µM    | 9.167  | No | ns | >0.9999 | K-U  |
| TNFa vs. Combo        | 5000pg/mL vs. 50pg/mL   | -27    | No | ns | >0.9999 | K-V  |
| TNFa vs. Combo        | 5000pg/mL vs. 100pg/mL  | 41.5   | No | ns | >0.9999 | K-W  |
| TNFa vs. Combo        | 5000pg/mL vs. 150pg/mL  | -12.5  | No | ns | >0.9999 | K-X  |
| TNFa vs. Combo        | 5000pg/mL vs. 200pg/mL  | -40    | No | ns | >0.9999 | K-Y  |
| TNFa vs. Combo        | 5000pg/mL vs. 250pg/mL  | 5      | No | ns | >0.9999 | K-Z  |
| TNFa vs. Combo        | 5000pg/mL vs. 500pg/mL  | 18.17  | No | ns | >0.9999 | K-AA |
| TNFa vs. Combo        | 5000pg/mL vs. 1000pg/mL | 38.17  | No | ns | >0.9999 | K-AB |
| TNFa vs. Combo        | 5000pg/mL vs. 2500pg/mL | 56     | No | ns | >0.9999 | K-AC |
| TNFa vs. Combo        | 5000pg/mL vs. 5000pg/mL | 60.83  | No | ns | >0.9999 | K-AD |
| Butyrate vs. Butyrate | 50µM vs. 75µM           | 17.33  | No | ns | >0.9999 | L-M  |
| Butyrate vs. Butyrate | 50µM vs. 100µM          | 10.67  | No | ns | >0.9999 | L-N  |
| Butyrate vs. Butyrate | 50µM vs. 250µM          | 82.67  | No | ns | >0.9999 | L-O  |
| Butyrate vs. Butyrate | 50µM vs. 500µM          | 28.17  | No | ns | >0.9999 | L-P  |
| Butyrate vs. Butyrate | 50µM vs. 750µM          | 4.833  | No | ns | >0.9999 | L-Q  |
| Butyrate vs. Butyrate | 50µM vs. 1000µM         | 56     | No | ns | >0.9999 | L-R  |
| Butyrate vs. Butyrate | 50µM vs. 2500µM         | 70.67  | No | ns | >0.9999 | L-S  |
| Butyrate vs. Butyrate | 50µM vs. 5000µM         | 63.33  | No | ns | >0.9999 | L-T  |
| Butyrate vs. Butyrate | 50µM vs. 7500µM         | 66.83  | No | ns | >0.9999 | L-U  |
| Butyrate vs. Combo    | 50µM vs. 50pg/mL        | 30.67  | No | ns | >0.9999 | L-V  |
| Butyrate vs. Combo    | 50µM vs. 100pg/mL       | 99.17  | No | ns | 0.426   | L-W  |
| Butyrate vs. Combo    | 50µM vs. 150pg/mL       | 45.17  | No | ns | >0.9999 | L-X  |
| Butyrate vs. Combo    | 50µM vs. 200pg/mL       | 17.67  | No | ns | >0.9999 | L-Y  |
| Butyrate vs. Combo    | 50µM vs. 250pg/mL       | 62.67  | No | ns | >0.9999 | L-Z  |
| Butyrate vs. Combo    | 50µM vs. 500pg/mL       | 75.83  | No | ns | >0.9999 | L-AA |
| Butyrate vs. Combo    | 50µM vs. 1000pg/mL      | 95.83  | No | ns | 0.6284  | L-AB |
| Butyrate vs. Combo    | 50µM vs. 2500pg/mL      | 113.7  | No | ns | 0.0687  | L-AC |

|                       |                     |        |     |    |         |      |
|-----------------------|---------------------|--------|-----|----|---------|------|
| Butyrate vs. Combo    | 50µM vs. 5000pg/mL  | 118.5  | Yes | *  | 0.0356  | L-AD |
| Butyrate vs. Butyrate | 75µM vs. 100µM      | -6.667 | No  | ns | >0.9999 | M-N  |
| Butyrate vs. Butyrate | 75µM vs. 250µM      | 65.33  | No  | ns | >0.9999 | M-O  |
| Butyrate vs. Butyrate | 75µM vs. 500µM      | 10.83  | No  | ns | >0.9999 | M-P  |
| Butyrate vs. Butyrate | 75µM vs. 750µM      | -12.5  | No  | ns | >0.9999 | M-Q  |
| Butyrate vs. Butyrate | 75µM vs. 1000µM     | 38.67  | No  | ns | >0.9999 | M-R  |
| Butyrate vs. Butyrate | 75µM vs. 2500µM     | 53.33  | No  | ns | >0.9999 | M-S  |
| Butyrate vs. Butyrate | 75µM vs. 5000µM     | 46     | No  | ns | >0.9999 | M-T  |
| Butyrate vs. Butyrate | 75µM vs. 7500µM     | 49.5   | No  | ns | >0.9999 | M-U  |
| Butyrate vs. Combo    | 75µM vs. 50pg/mL    | 13.33  | No  | ns | >0.9999 | M-V  |
| Butyrate vs. Combo    | 75µM vs. 100pg/mL   | 81.83  | No  | ns | >0.9999 | M-W  |
| Butyrate vs. Combo    | 75µM vs. 150pg/mL   | 27.83  | No  | ns | >0.9999 | M-X  |
| Butyrate vs. Combo    | 75µM vs. 200pg/mL   | 0.3333 | No  | ns | >0.9999 | M-Y  |
| Butyrate vs. Combo    | 75µM vs. 250pg/mL   | 45.33  | No  | ns | >0.9999 | M-Z  |
| Butyrate vs. Combo    | 75µM vs. 500pg/mL   | 58.5   | No  | ns | >0.9999 | M-AA |
| Butyrate vs. Combo    | 75µM vs. 1000pg/mL  | 78.5   | No  | ns | >0.9999 | M-AB |
| Butyrate vs. Combo    | 75µM vs. 2500pg/mL  | 96.33  | No  | ns | 0.5932  | M-AC |
| Butyrate vs. Combo    | 75µM vs. 5000pg/mL  | 101.2  | No  | ns | 0.3355  | M-AD |
| Butyrate vs. Combo    | 100µM vs. 250µM     | 72     | No  | ns | >0.9999 | N-O  |
| Butyrate vs. Combo    | 100µM vs. 500µM     | 17.5   | No  | ns | >0.9999 | N-P  |
| Butyrate vs. Butyrate | 100µM vs. 750µM     | -5.833 | No  | ns | >0.9999 | N-Q  |
| Butyrate vs. Butyrate | 100µM vs. 1000µM    | 45.33  | No  | ns | >0.9999 | N-R  |
| Butyrate vs. Butyrate | 100µM vs. 2500µM    | 60     | No  | ns | >0.9999 | N-S  |
| Butyrate vs. Butyrate | 100µM vs. 5000µM    | 52.67  | No  | ns | >0.9999 | N-T  |
| Butyrate vs. Butyrate | 100µM vs. 7500µM    | 56.17  | No  | ns | >0.9999 | N-U  |
| Butyrate vs. Combo    | 100µM vs. 50pg/mL   | 20     | No  | ns | >0.9999 | N-V  |
| Butyrate vs. Combo    | 100µM vs. 100pg/mL  | 88.5   | No  | ns | >0.9999 | N-W  |
| Butyrate vs. Combo    | 100µM vs. 150pg/mL  | 34.5   | No  | ns | >0.9999 | N-X  |
| Butyrate vs. Combo    | 100µM vs. 200pg/mL  | 7      | No  | ns | >0.9999 | N-Y  |
| Butyrate vs. Combo    | 100µM vs. 250pg/mL  | 52     | No  | ns | >0.9999 | N-Z  |
| Butyrate vs. Combo    | 100µM vs. 500pg/mL  | 65.17  | No  | ns | >0.9999 | N-AA |
| Butyrate vs. Combo    | 100µM vs. 1000pg/mL | 85.17  | No  | ns | >0.9999 | N-AB |
| Butyrate vs. Combo    | 100µM vs. 2500pg/mL | 103    | No  | ns | 0.2686  | N-AC |
| Butyrate vs. Combo    | 100µM vs. 5000pg/mL | 107.8  | No  | ns | 0.1469  | N-AD |
| Butyrate vs. Butyrate | 250µM vs. 500µM     | -54.5  | No  | ns | >0.9999 | O-P  |
| Butyrate vs. Butyrate | 250µM vs. 750µM     | -77.83 | No  | ns | >0.9999 | O-Q  |
| Butyrate vs. Butyrate | 250µM vs. 1000µM    | -26.67 | No  | ns | >0.9999 | O-R  |
| Butyrate vs. Butyrate | 250µM vs. 2500µM    | -12    | No  | ns | >0.9999 | O-S  |
| Butyrate vs. Butyrate | 250µM vs. 5000µM    | -19.33 | No  | ns | >0.9999 | O-T  |
| Butyrate vs. Butyrate | 250µM vs. 7500µM    | -15.83 | No  | ns | >0.9999 | O-U  |
| Butyrate vs. Combo    | 250µM vs. 50pg/mL   | -52    | No  | ns | >0.9999 | O-V  |
| Butyrate vs. Combo    | 250µM vs. 100pg/mL  | 16.5   | No  | ns | >0.9999 | O-W  |
| Butyrate vs. Combo    | 250µM vs. 150pg/mL  | -37.5  | No  | ns | >0.9999 | O-X  |
| Butyrate vs. Combo    | 250µM vs. 200pg/mL  | -65    | No  | ns | >0.9999 | O-Y  |
| Butyrate vs. Combo    | 250µM vs. 250pg/mL  | -20    | No  | ns | >0.9999 | O-Z  |
| Butyrate vs. Combo    | 250µM vs. 500pg/mL  | -6.833 | No  | ns | >0.9999 | O-AA |
| Butyrate vs. Combo    | 250µM vs. 1000pg/mL | 13.17  | No  | ns | >0.9999 | O-AB |

|                       |                      |        |    |    |         |      |
|-----------------------|----------------------|--------|----|----|---------|------|
| Butyrate vs. Combo    | 250µM vs. 2500pg/mL  | 31     | No | ns | >0.9999 | O-AC |
| Butyrate vs. Combo    | 250µM vs. 5000pg/mL  | 35.83  | No | ns | >0.9999 | O-AD |
| Butyrate vs. Butyrate | 500µM vs. 750µM      | -23.33 | No | ns | >0.9999 | P-Q  |
| Butyrate vs. Butyrate | 500µM vs. 1000µM     | 27.83  | No | ns | >0.9999 | P-R  |
| Butyrate vs. Butyrate | 500µM vs. 2500µM     | 42.5   | No | ns | >0.9999 | P-S  |
| Butyrate vs. Butyrate | 500µM vs. 5000µM     | 35.17  | No | ns | >0.9999 | P-T  |
| Butyrate vs. Butyrate | 500µM vs. 7500µM     | 38.67  | No | ns | >0.9999 | P-U  |
| Butyrate vs. Combo    | 500µM vs. 50pg/mL    | 2.5    | No | ns | >0.9999 | P-V  |
| Butyrate vs. Combo    | 500µM vs. 100pg/mL   | 71     | No | ns | >0.9999 | P-W  |
| Butyrate vs. Combo    | 500µM vs. 150pg/mL   | 17     | No | ns | >0.9999 | P-X  |
| Butyrate vs. Combo    | 500µM vs. 200pg/mL   | -10.5  | No | ns | >0.9999 | P-Y  |
| Butyrate vs. Combo    | 500µM vs. 250pg/mL   | 34.5   | No | ns | >0.9999 | P-Z  |
| Butyrate vs. Combo    | 500µM vs. 500pg/mL   | 47.67  | No | ns | >0.9999 | P-AA |
| Butyrate vs. Combo    | 500µM vs. 1000pg/mL  | 67.67  | No | ns | >0.9999 | P-AB |
| Butyrate vs. Combo    | 500µM vs. 2500pg/mL  | 85.5   | No | ns | >0.9999 | P-AC |
| Butyrate vs. Combo    | 500µM vs. 5000pg/mL  | 90.33  | No | ns | >0.9999 | P-AD |
| Butyrate vs. Butyrate | 750µM vs. 1000µM     | 51.17  | No | ns | >0.9999 | Q-R  |
| Butyrate vs. Butyrate | 750µM vs. 2500µM     | 65.83  | No | ns | >0.9999 | Q-S  |
| Butyrate vs. Butyrate | 750µM vs. 5000µM     | 58.5   | No | ns | >0.9999 | Q-T  |
| Butyrate vs. Butyrate | 750µM vs. 7500µM     | 62     | No | ns | >0.9999 | Q-U  |
| Butyrate vs. Combo    | 750µM vs. 50pg/mL    | 25.83  | No | ns | >0.9999 | Q-V  |
| Butyrate vs. Combo    | 750µM vs. 100pg/mL   | 94.33  | No | ns | 0.7457  | Q-W  |
| Butyrate vs. Combo    | 750µM vs. 150pg/mL   | 40.33  | No | ns | >0.9999 | Q-X  |
| Butyrate vs. Combo    | 750µM vs. 200pg/mL   | 12.83  | No | ns | >0.9999 | Q-Y  |
| Butyrate vs. Combo    | 750µM vs. 250pg/mL   | 57.83  | No | ns | >0.9999 | Q-Z  |
| Butyrate vs. Combo    | 750µM vs. 500pg/mL   | 71     | No | ns | >0.9999 | Q-AA |
| Butyrate vs. Combo    | 750µM vs. 1000pg/mL  | 91     | No | ns | >0.9999 | Q-AB |
| Butyrate vs. Combo    | 750µM vs. 2500pg/mL  | 108.8  | No | ns | 0.1293  | Q-AC |
| Butyrate vs. Combo    | 750µM vs. 5000pg/mL  | 113.7  | No | ns | 0.0687  | Q-AD |
| Butyrate vs. Butyrate | 1000µM vs. 2500µM    | 14.67  | No | ns | >0.9999 | R-S  |
| Butyrate vs. Butyrate | 1000µM vs. 5000µM    | 7.333  | No | ns | >0.9999 | R-T  |
| Butyrate vs. Butyrate | 1000µM vs. 7500µM    | 10.83  | No | ns | >0.9999 | R-U  |
| Butyrate vs. Combo    | 1000µM vs. 50pg/mL   | -25.33 | No | ns | >0.9999 | R-V  |
| Butyrate vs. Combo    | 1000µM vs. 100pg/mL  | 43.17  | No | ns | >0.9999 | R-W  |
| Butyrate vs. Combo    | 1000µM vs. 150pg/mL  | -10.83 | No | ns | >0.9999 | R-X  |
| Butyrate vs. Combo    | 1000µM vs. 200pg/mL  | -38.33 | No | ns | >0.9999 | R-Y  |
| Butyrate vs. Combo    | 1000µM vs. 250pg/mL  | 6.667  | No | ns | >0.9999 | R-Z  |
| Butyrate vs. Combo    | 1000µM vs. 500pg/mL  | 19.83  | No | ns | >0.9999 | R-AA |
| Butyrate vs. Combo    | 1000µM vs. 1000pg/mL | 39.83  | No | ns | >0.9999 | R-AB |
| Butyrate vs. Combo    | 1000µM vs. 2500pg/mL | 57.67  | No | ns | >0.9999 | R-AC |
| Butyrate vs. Combo    | 1000µM vs. 5000pg/mL | 62.5   | No | ns | >0.9999 | R-AD |
| Butyrate vs. Butyrate | 2500µM vs. 5000µM    | -7.333 | No | ns | >0.9999 | S-T  |
| Butyrate vs. Butyrate | 2500µM vs. 7500µM    | -3.833 | No | ns | >0.9999 | S-U  |
| Butyrate vs. Combo    | 2500µM vs. 50pg/mL   | -40    | No | ns | >0.9999 | S-V  |
| Butyrate vs. Combo    | 2500µM vs. 100pg/mL  | 28.5   | No | ns | >0.9999 | S-W  |
| Butyrate vs. Combo    | 2500µM vs. 150pg/mL  | -25.5  | No | ns | >0.9999 | S-X  |
| Butyrate vs. Combo    | 2500µM vs. 200pg/mL  | -53    | No | ns | >0.9999 | S-Y  |

|                       |                        |            |    |         |      |
|-----------------------|------------------------|------------|----|---------|------|
| Butyrate vs. Combo    | 2500μM vs. 250pg/mL    | -8 No      | ns | >0.9999 | S-Z  |
| Butyrate vs. Combo    | 2500μM vs. 500pg/mL    | 5.167 No   | ns | >0.9999 | S-AA |
| Butyrate vs. Combo    | 2500μM vs. 1000pg/mL   | 25.17 No   | ns | >0.9999 | S-AB |
| Butyrate vs. Combo    | 2500μM vs. 2500pg/mL   | 43 No      | ns | >0.9999 | S-AC |
| Butyrate vs. Combo    | 2500μM vs. 5000pg/mL   | 47.83 No   | ns | >0.9999 | S-AD |
| Butyrate vs. Butyrate | 5000μM vs. 7500μM      | 3.5 No     | ns | >0.9999 | T-U  |
| Butyrate vs. Combo    | 5000μM vs. 50pg/mL     | -32.67 No  | ns | >0.9999 | T-V  |
| Butyrate vs. Combo    | 5000μM vs. 100pg/mL    | 35.83 No   | ns | >0.9999 | T-W  |
| Butyrate vs. Combo    | 5000μM vs. 150pg/mL    | -18.17 No  | ns | >0.9999 | T-X  |
| Butyrate vs. Combo    | 5000μM vs. 200pg/mL    | -45.67 No  | ns | >0.9999 | T-Y  |
| Butyrate vs. Combo    | 5000μM vs. 250pg/mL    | -0.6667 No | ns | >0.9999 | T-Z  |
| Butyrate vs. Combo    | 5000μM vs. 500pg/mL    | 12.5 No    | ns | >0.9999 | T-AA |
| Butyrate vs. Combo    | 5000μM vs. 1000pg/mL   | 32.5 No    | ns | >0.9999 | T-AB |
| Butyrate vs. Combo    | 5000μM vs. 2500pg/mL   | 50.33 No   | ns | >0.9999 | T-AC |
| Butyrate vs. Combo    | 5000μM vs. 5000pg/mL   | 55.17 No   | ns | >0.9999 | T-AD |
| Butyrate vs. Combo    | 7500μM vs. 50pg/mL     | -36.17 No  | ns | >0.9999 | U-V  |
| Butyrate vs. Combo    | 7500μM vs. 100pg/mL    | 32.33 No   | ns | >0.9999 | U-W  |
| Butyrate vs. Combo    | 7500μM vs. 150pg/mL    | -21.67 No  | ns | >0.9999 | U-X  |
| Butyrate vs. Combo    | 7500μM vs. 200pg/mL    | -49.17 No  | ns | >0.9999 | U-Y  |
| Butyrate vs. Combo    | 7500μM vs. 250pg/mL    | -4.167 No  | ns | >0.9999 | U-Z  |
| Butyrate vs. Combo    | 7500μM vs. 500pg/mL    | 9 No       | ns | >0.9999 | U-AA |
| Butyrate vs. Combo    | 7500μM vs. 1000pg/mL   | 29 No      | ns | >0.9999 | U-AB |
| Butyrate vs. Combo    | 7500μM vs. 2500pg/mL   | 46.83 No   | ns | >0.9999 | U-AC |
| Butyrate vs. Combo    | 7500μM vs. 5000pg/mL   | 51.67 No   | ns | >0.9999 | U-AD |
| Butyrate vs. Combo    | 50pg/mL vs. 100pg/mL   | 68.5 No    | ns | >0.9999 | V-W  |
| Combo vs. Combo       | 50pg/mL vs. 150pg/mL   | 14.5 No    | ns | >0.9999 | V-X  |
| Combo vs. Combo       | 50pg/mL vs. 200pg/mL   | -13 No     | ns | >0.9999 | V-Y  |
| Combo vs. Combo       | 50pg/mL vs. 250pg/mL   | 32 No      | ns | >0.9999 | V-Z  |
| Combo vs. Combo       | 50pg/mL vs. 500pg/mL   | 45.17 No   | ns | >0.9999 | V-AA |
| Combo vs. Combo       | 50pg/mL vs. 1000pg/mL  | 65.17 No   | ns | >0.9999 | V-AB |
| Combo vs. Combo       | 50pg/mL vs. 2500pg/mL  | 83 No      | ns | >0.9999 | V-AC |
| Combo vs. Combo       | 50pg/mL vs. 5000pg/mL  | 87.83 No   | ns | >0.9999 | V-AD |
| Combo vs. Combo       | 100pg/mL vs. 150pg/mL  | -54 No     | ns | >0.9999 | W-X  |
| Combo vs. Combo       | 100pg/mL vs. 200pg/mL  | -81.5 No   | ns | >0.9999 | W-Y  |
| Combo vs. Combo       | 100pg/mL vs. 250pg/mL  | -36.5 No   | ns | >0.9999 | W-Z  |
| Combo vs. Combo       | 100pg/mL vs. 500pg/mL  | -23.33 No  | ns | >0.9999 | W-AA |
| Combo vs. Combo       | 100pg/mL vs. 1000pg/mL | -3.333 No  | ns | >0.9999 | W-AB |
| Combo vs. Combo       | 100pg/mL vs. 2500pg/mL | 14.5 No    | ns | >0.9999 | W-AC |
| Combo vs. Combo       | 100pg/mL vs. 5000pg/mL | 19.33 No   | ns | >0.9999 | W-AD |
| Combo vs. Combo       | 150pg/mL vs. 200pg/mL  | -27.5 No   | ns | >0.9999 | X-Y  |
| Combo vs. Combo       | 150pg/mL vs. 250pg/mL  | 17.5 No    | ns | >0.9999 | X-Z  |
| Combo vs. Combo       | 150pg/mL vs. 500pg/mL  | 30.67 No   | ns | >0.9999 | X-AA |
| Combo vs. Combo       | 150pg/mL vs. 1000pg/mL | 50.67 No   | ns | >0.9999 | X-AB |
| Combo vs. Combo       | 150pg/mL vs. 2500pg/mL | 68.5 No    | ns | >0.9999 | X-AC |
| Combo vs. Combo       | 150pg/mL vs. 5000pg/mL | 73.33 No   | ns | >0.9999 | X-AD |
| Combo vs. Combo       | 200pg/mL vs. 250pg/mL  | 45 No      | ns | >0.9999 | Y-Z  |
| Combo vs. Combo       | 200pg/mL vs. 500pg/mL  | 58.17 No   | ns | >0.9999 | Y-AA |

|                 |                         |       |    |    |         |       |
|-----------------|-------------------------|-------|----|----|---------|-------|
| Combo vs. Combo | 200pg/mL vs. 1000pg/mL  | 78.17 | No | ns | >0.9999 | Y-AB  |
| Combo vs. Combo | 200pg/mL vs. 2500pg/mL  | 96    | No | ns | 0.6164  | Y-AC  |
| Combo vs. Combo | 200pg/mL vs. 5000pg/mL  | 100.8 | No | ns | 0.3492  | Y-AD  |
| Combo vs. Combo | 250pg/mL vs. 500pg/mL   | 13.17 | No | ns | >0.9999 | Z-AA  |
| Combo vs. Combo | 250pg/mL vs. 1000pg/mL  | 33.17 | No | ns | >0.9999 | Z-AB  |
| Combo vs. Combo | 250pg/mL vs. 2500pg/mL  | 51    | No | ns | >0.9999 | Z-AC  |
| Combo vs. Combo | 250pg/mL vs. 5000pg/mL  | 55.83 | No | ns | >0.9999 | Z-AD  |
| Combo vs. Combo | 500pg/mL vs. 1000pg/mL  | 20    | No | ns | >0.9999 | AA-AB |
| Combo vs. Combo | 500pg/mL vs. 2500pg/mL  | 37.83 | No | ns | >0.9999 | AA-AC |
| Combo vs. Combo | 500pg/mL vs. 5000pg/mL  | 42.67 | No | ns | >0.9999 | AA-AD |
| Combo vs. Combo | 1000pg/mL vs. 2500pg/mL | 17.83 | No | ns | >0.9999 | AB-AC |
| Combo vs. Combo | 1000pg/mL vs. 5000pg/mL | 22.67 | No | ns | >0.9999 | AB-AD |

| Treatment          | Dunn's multiple comparisons test | Mean rank | Significant' | Summary |      |
|--------------------|----------------------------------|-----------|--------------|---------|------|
| Media vs. Lysis    | Media vs. Lysis                  | -70.83    | No           | ns      | A-B  |
| Media vs. TNFa     | Media vs. 50pg/mL                | -15.17    | No           | ns      | A-C  |
| Media vs. TNFa     | Media vs. 100pg/mL               | -23.17    | No           | ns      | A-D  |
| Media vs. TNFa     | Media vs. 150pg/mL               | -28.83    | No           | ns      | A-E  |
| Media vs. TNFa     | Media vs. 200pg/mL               | -35.83    | No           | ns      | A-F  |
| Media vs. TNFa     | Media vs. 250pg/mL               | -40.5     | No           | ns      | A-G  |
| Media vs. TNFa     | Media vs. 500pg/mL               | -55.83    | No           | ns      | A-H  |
| Media vs. TNFa     | Media vs. 1ng/mL                 | -58.83    | No           | ns      | A-I  |
| Media vs. TNFa     | Media vs. 2.5ng/mL               | -62.17    | No           | ns      | A-J  |
| Media vs. TNFa     | Media vs. 5ng/mL                 | -66.17    | No           | ns      | A-K  |
| Media vs. TNFa     | Media vs. 10ng/mL                | -66.17    | No           | ns      | A-L  |
| Media vs. Butyrate | Media vs. 50µM                   | 1.167     | No           | ns      | A-M  |
| Media vs. Butyrate | Media vs. 75µM                   | 6.5       | No           | ns      | A-N  |
| Media vs. Butyrate | Media vs. 100µM                  | 13.83     | No           | ns      | A-O  |
| Media vs. Butyrate | Media vs. 250µM                  | 15.17     | No           | ns      | A-P  |
| Media vs. Butyrate | Media vs. 500µM                  | 6.833     | No           | ns      | A-Q  |
| Media vs. Butyrate | Media vs. 750µM                  | 1.5       | No           | ns      | A-R  |
| Media vs. Butyrate | Media vs. 1mM                    | -8.167    | No           | ns      | A-S  |
| Media vs. Butyrate | Media vs. 2.5mM                  | -25.5     | No           | ns      | A-T  |
| Media vs. Butyrate | Media vs. 5mM                    | -47.83    | No           | ns      | A-U  |
| Media vs. Butyrate | Media vs. 7.5mM                  | -45.5     | No           | ns      | A-V  |
| Media vs. Butyrate | Media vs. 10mM                   | -51.83    | No           | ns      | A-W  |
| Media vs. Butyrate | Media vs. 25mM                   | -38.17    | No           | ns      | A-X  |
| Media vs. Combo    | Media vs. 50pg/mL                | -10.17    | No           | ns      | A-Y  |
| Media vs. Combo    | Media vs. 150pg/mL               | -15.5     | No           | ns      | A-Z  |
| Media vs. Combo    | Media vs. 250pg/mL               | -19.83    | No           | ns      | A-AA |
| Media vs. Combo    | Media vs. 500pg/mL               | -32.17    | No           | ns      | A-AB |
| Media vs. Combo    | Media vs. 1ng/mL                 | -46.83    | No           | ns      | A-AC |
| Lysis vs. TNFa     | Lysis vs. 50pg/mL                | 55.67     | No           | ns      | B-C  |
| Lysis vs. TNFa     | Lysis vs. 100pg/mL               | 47.67     | No           | ns      | B-D  |
| Lysis vs. TNFa     | Lysis vs. 150pg/mL               | 42        | No           | ns      | B-E  |
| Lysis vs. TNFa     | Lysis vs. 200pg/mL               | 35        | No           | ns      | B-F  |
| Lysis vs. TNFa     | Lysis vs. 250pg/mL               | 30.33     | No           | ns      | B-G  |
| Lysis vs. TNFa     | Lysis vs. 500pg/mL               | 15        | No           | ns      | B-H  |
| Lysis vs. TNFa     | Lysis vs. 1ng/mL                 | 12        | No           | ns      | B-I  |
| Lysis vs. TNFa     | Lysis vs. 2.5ng/mL               | 8.667     | No           | ns      | B-J  |
| Lysis vs. TNFa     | Lysis vs. 5ng/mL                 | 4.667     | No           | ns      | B-K  |
| Lysis vs. TNFa     | Lysis vs. 10ng/mL                | 4.667     | No           | ns      | B-L  |
| Lysis vs. Butyrate | Lysis vs. 50µM                   | 72        | No           | ns      | B-M  |
| Lysis vs. Butyrate | Lysis vs. 75µM                   | 77.33     | No           | ns      | B-N  |
| Lysis vs. Butyrate | Lysis vs. 100µM                  | 84.67     | Yes          | *       | B-O  |
| Lysis vs. Butyrate | Lysis vs. 250µM                  | 86        | Yes          | *       | B-P  |
| Lysis vs. Butyrate | Lysis vs. 500µM                  | 77.67     | No           | ns      | B-Q  |
| Lysis vs. Butyrate | Lysis vs. 750µM                  | 72.33     | No           | ns      | B-R  |
| Lysis vs. Butyrate | Lysis vs. 1mM                    | 62.67     | No           | ns      | B-S  |
| Lysis vs. Butyrate | Lysis vs. 2.5mM                  | 45.33     | No           | ns      | B-T  |

|                    |                       |         |    |    |      |
|--------------------|-----------------------|---------|----|----|------|
| Lysis vs. Butyrate | Lysis vs. 5mM         | 23      | No | ns | B-U  |
| Lysis vs. Butyrate | Lysis vs. 7.5mM       | 25.33   | No | ns | B-V  |
| Lysis vs. Butyrate | Lysis vs. 10mM        | 19      | No | ns | B-W  |
| Lysis vs. Butyrate | Lysis vs. 25mM        | 32.67   | No | ns | B-X  |
| Lysis vs. Combo    | Lysis vs. 50pg/mL     | 60.67   | No | ns | B-Y  |
| Lysis vs. Combo    | Lysis vs. 150pg/mL    | 55.33   | No | ns | B-Z  |
| Lysis vs. Combo    | Lysis vs. 250pg/mL    | 51      | No | ns | B-AA |
| Lysis vs. Combo    | Lysis vs. 500pg/mL    | 38.67   | No | ns | B-AB |
| Lysis vs. Combo    | Lysis vs. 1ng/mL      | 24      | No | ns | B-AC |
| TNFa vs. TNFa      | 50pg/mL vs. 100pg/mL  | -8      | No | ns | C-D  |
| TNFa vs. TNFa      | 50pg/mL vs. 150pg/mL  | -13.67  | No | ns | C-E  |
| TNFa vs. TNFa      | 50pg/mL vs. 200pg/mL  | -20.67  | No | ns | C-F  |
| TNFa vs. TNFa      | 50pg/mL vs. 250pg/mL  | -25.33  | No | ns | C-G  |
| TNFa vs. TNFa      | 50pg/mL vs. 500pg/mL  | -40.67  | No | ns | C-H  |
| TNFa vs. TNFa      | 50pg/mL vs. 1ng/mL    | -43.67  | No | ns | C-I  |
| TNFa vs. TNFa      | 50pg/mL vs. 2.5ng/mL  | -47     | No | ns | C-J  |
| TNFa vs. TNFa      | 50pg/mL vs. 5ng/mL    | -51     | No | ns | C-K  |
| TNFa vs. TNFa      | 50pg/mL vs. 10ng/mL   | -51     | No | ns | C-L  |
| TNFa vs. Butyrate  | 50pg/mL vs. 50µM      | 16.33   | No | ns | C-M  |
| TNFa vs. Butyrate  | 50pg/mL vs. 75µM      | 21.67   | No | ns | C-N  |
| TNFa vs. Butyrate  | 50pg/mL vs. 100µM     | 29      | No | ns | C-O  |
| TNFa vs. Butyrate  | 50pg/mL vs. 250µM     | 30.33   | No | ns | C-P  |
| TNFa vs. Butyrate  | 50pg/mL vs. 500µM     | 22      | No | ns | C-Q  |
| TNFa vs. Butyrate  | 50pg/mL vs. 750µM     | 16.67   | No | ns | C-R  |
| TNFa vs. Butyrate  | 50pg/mL vs. 1mM       | 7       | No | ns | C-S  |
| TNFa vs. Butyrate  | 50pg/mL vs. 2.5mM     | -10.33  | No | ns | C-T  |
| TNFa vs. Butyrate  | 50pg/mL vs. 5mM       | -32.67  | No | ns | C-U  |
| TNFa vs. Butyrate  | 50pg/mL vs. 7.5mM     | -30.33  | No | ns | C-V  |
| TNFa vs. Butyrate  | 50pg/mL vs. 10mM      | -36.67  | No | ns | C-W  |
| TNFa vs. Butyrate  | 50pg/mL vs. 25mM      | -23     | No | ns | C-X  |
| TNFa vs. Combo     | 50pg/mL vs. 50pg/mL   | 5       | No | ns | C-Y  |
| TNFa vs. Combo     | 50pg/mL vs. 150pg/mL  | -0.3333 | No | ns | C-Z  |
| TNFa vs. Combo     | 50pg/mL vs. 250pg/mL  | -4.667  | No | ns | C-AA |
| TNFa vs. Combo     | 50pg/mL vs. 500pg/mL  | -17     | No | ns | C-AB |
| TNFa vs. Combo     | 50pg/mL vs. 1ng/mL    | -31.67  | No | ns | C-AC |
| TNFa vs. TNFa      | 100pg/mL vs. 150pg/mL | -5.667  | No | ns | D-E  |
| TNFa vs. TNFa      | 100pg/mL vs. 200pg/mL | -12.67  | No | ns | D-F  |
| TNFa vs. TNFa      | 100pg/mL vs. 250pg/mL | -17.33  | No | ns | D-G  |
| TNFa vs. TNFa      | 100pg/mL vs. 500pg/mL | -32.67  | No | ns | D-H  |
| TNFa vs. TNFa      | 100pg/mL vs. 1ng/mL   | -35.67  | No | ns | D-I  |
| TNFa vs. TNFa      | 100pg/mL vs. 2.5ng/mL | -39     | No | ns | D-J  |
| TNFa vs. TNFa      | 100pg/mL vs. 5ng/mL   | -43     | No | ns | D-K  |
| TNFa vs. TNFa      | 100pg/mL vs. 10ng/mL  | -43     | No | ns | D-L  |
| TNFa vs. Butyrate  | 100pg/mL vs. 50µM     | 24.33   | No | ns | D-M  |
| TNFa vs. Butyrate  | 100pg/mL vs. 75µM     | 29.67   | No | ns | D-N  |
| TNFa vs. Butyrate  | 100pg/mL vs. 100µM    | 37      | No | ns | D-O  |
| TNFa vs. Butyrate  | 100pg/mL vs. 250µM    | 38.33   | No | ns | D-P  |

|                   |                       |        |    |    |      |
|-------------------|-----------------------|--------|----|----|------|
| TNFa vs. Butyrate | 100pg/mL vs. 500µM    | 30     | No | ns | D-Q  |
| TNFa vs. Butyrate | 100pg/mL vs. 750µM    | 24.67  | No | ns | D-R  |
| TNFa vs. Butyrate | 100pg/mL vs. 1mM      | 15     | No | ns | D-S  |
| TNFa vs. Butyrate | 100pg/mL vs. 2.5mM    | -2.333 | No | ns | D-T  |
| TNFa vs. Butyrate | 100pg/mL vs. 5mM      | -24.67 | No | ns | D-U  |
| TNFa vs. Butyrate | 100pg/mL vs. 7.5mM    | -22.33 | No | ns | D-V  |
| TNFa vs. Butyrate | 100pg/mL vs. 10mM     | -28.67 | No | ns | D-W  |
| TNFa vs. Butyrate | 100pg/mL vs. 25mM     | -15    | No | ns | D-X  |
| TNFa vs. Combo    | 100pg/mL vs. 50pg/mL  | 13     | No | ns | D-Y  |
| TNFa vs. Combo    | 100pg/mL vs. 150pg/mL | 7.667  | No | ns | D-Z  |
| TNFa vs. Combo    | 100pg/mL vs. 250pg/mL | 3.333  | No | ns | D-AA |
| TNFa vs. Combo    | 100pg/mL vs. 500pg/mL | -9     | No | ns | D-AB |
| TNFa vs. Combo    | 100pg/mL vs. 1ng/mL   | -23.67 | No | ns | D-AC |
| TNFa vs. TNFa     | 150pg/mL vs. 200pg/mL | -7     | No | ns | E-F  |
| TNFa vs. TNFa     | 150pg/mL vs. 250pg/mL | -11.67 | No | ns | E-G  |
| TNFa vs. TNFa     | 150pg/mL vs. 500pg/mL | -27    | No | ns | E-H  |
| TNFa vs. TNFa     | 150pg/mL vs. 1ng/mL   | -30    | No | ns | E-I  |
| TNFa vs. TNFa     | 150pg/mL vs. 2.5ng/mL | -33.33 | No | ns | E-J  |
| TNFa vs. TNFa     | 150pg/mL vs. 5ng/mL   | -37.33 | No | ns | E-K  |
| TNFa vs. TNFa     | 150pg/mL vs. 10ng/mL  | -37.33 | No | ns | E-L  |
| TNFa vs. Butyrate | 150pg/mL vs. 50µM     | 30     | No | ns | E-M  |
| TNFa vs. Butyrate | 150pg/mL vs. 75µM     | 35.33  | No | ns | E-N  |
| TNFa vs. Butyrate | 150pg/mL vs. 100µM    | 42.67  | No | ns | E-O  |
| TNFa vs. Butyrate | 150pg/mL vs. 250µM    | 44     | No | ns | E-P  |
| TNFa vs. Butyrate | 150pg/mL vs. 500µM    | 35.67  | No | ns | E-Q  |
| TNFa vs. Butyrate | 150pg/mL vs. 750µM    | 30.33  | No | ns | E-R  |
| TNFa vs. Butyrate | 150pg/mL vs. 1mM      | 20.67  | No | ns | E-S  |
| TNFa vs. Butyrate | 150pg/mL vs. 2.5mM    | 3.333  | No | ns | E-T  |
| TNFa vs. Butyrate | 150pg/mL vs. 5mM      | -19    | No | ns | E-U  |
| TNFa vs. Butyrate | 150pg/mL vs. 7.5mM    | -16.67 | No | ns | E-V  |
| TNFa vs. Butyrate | 150pg/mL vs. 10mM     | -23    | No | ns | E-W  |
| TNFa vs. Butyrate | 150pg/mL vs. 25mM     | -9.333 | No | ns | E-X  |
| TNFa vs. Combo    | 150pg/mL vs. 50pg/mL  | 18.67  | No | ns | E-Y  |
| TNFa vs. Combo    | 150pg/mL vs. 150pg/mL | 13.33  | No | ns | E-Z  |
| TNFa vs. Combo    | 150pg/mL vs. 250pg/mL | 9      | No | ns | E-AA |
| TNFa vs. Combo    | 150pg/mL vs. 500pg/mL | -3.333 | No | ns | E-AB |
| TNFa vs. Combo    | 150pg/mL vs. 1ng/mL   | -18    | No | ns | E-AC |
| TNFa vs. TNFa     | 200pg/mL vs. 250pg/mL | -4.667 | No | ns | F-G  |
| TNFa vs. TNFa     | 200pg/mL vs. 500pg/mL | -20    | No | ns | F-H  |
| TNFa vs. TNFa     | 200pg/mL vs. 1ng/mL   | -23    | No | ns | F-I  |
| TNFa vs. TNFa     | 200pg/mL vs. 2.5ng/mL | -26.33 | No | ns | F-J  |
| TNFa vs. TNFa     | 200pg/mL vs. 5ng/mL   | -30.33 | No | ns | F-K  |
| TNFa vs. TNFa     | 200pg/mL vs. 10ng/mL  | -30.33 | No | ns | F-L  |
| TNFa vs. Butyrate | 200pg/mL vs. 50µM     | 37     | No | ns | F-M  |
| TNFa vs. Butyrate | 200pg/mL vs. 75µM     | 42.33  | No | ns | F-N  |
| TNFa vs. Butyrate | 200pg/mL vs. 100µM    | 49.67  | No | ns | F-O  |
| TNFa vs. Butyrate | 200pg/mL vs. 250µM    | 51     | No | ns | F-P  |

|                   |                       |        |    |    |      |
|-------------------|-----------------------|--------|----|----|------|
| TNFa vs. Butyrate | 200pg/mL vs. 500µM    | 42.67  | No | ns | F-Q  |
| TNFa vs. Butyrate | 200pg/mL vs. 750µM    | 37.33  | No | ns | F-R  |
| TNFa vs. Butyrate | 200pg/mL vs. 1mM      | 27.67  | No | ns | F-S  |
| TNFa vs. Butyrate | 200pg/mL vs. 2.5mM    | 10.33  | No | ns | F-T  |
| TNFa vs. Butyrate | 200pg/mL vs. 5mM      | -12    | No | ns | F-U  |
| TNFa vs. Butyrate | 200pg/mL vs. 7.5mM    | -9.667 | No | ns | F-V  |
| TNFa vs. Butyrate | 200pg/mL vs. 10mM     | -16    | No | ns | F-W  |
| TNFa vs. Butyrate | 200pg/mL vs. 25mM     | -2.333 | No | ns | F-X  |
| TNFa vs. Combo    | 200pg/mL vs. 50pg/mL  | 25.67  | No | ns | F-Y  |
| TNFa vs. Combo    | 200pg/mL vs. 150pg/mL | 20.33  | No | ns | F-Z  |
| TNFa vs. Combo    | 200pg/mL vs. 250pg/mL | 16     | No | ns | F-AA |
| TNFa vs. Combo    | 200pg/mL vs. 500pg/mL | 3.667  | No | ns | F-AB |
| TNFa vs. Combo    | 200pg/mL vs. 1ng/mL   | -11    | No | ns | F-AC |
| TNFa vs. TNFa     | 250pg/mL vs. 500pg/mL | -15.33 | No | ns | G-H  |
| TNFa vs. TNFa     | 250pg/mL vs. 1ng/mL   | -18.33 | No | ns | G-I  |
| TNFa vs. TNFa     | 250pg/mL vs. 2.5ng/mL | -21.67 | No | ns | G-J  |
| TNFa vs. TNFa     | 250pg/mL vs. 5ng/mL   | -25.67 | No | ns | G-K  |
| TNFa vs. TNFa     | 250pg/mL vs. 10ng/mL  | -25.67 | No | ns | G-L  |
| TNFa vs. Butyrate | 250pg/mL vs. 50µM     | 41.67  | No | ns | G-M  |
| TNFa vs. Butyrate | 250pg/mL vs. 75µM     | 47     | No | ns | G-N  |
| TNFa vs. Butyrate | 250pg/mL vs. 100µM    | 54.33  | No | ns | G-O  |
| TNFa vs. Butyrate | 250pg/mL vs. 250µM    | 55.67  | No | ns | G-P  |
| TNFa vs. Butyrate | 250pg/mL vs. 500µM    | 47.33  | No | ns | G-Q  |
| TNFa vs. Butyrate | 250pg/mL vs. 750µM    | 42     | No | ns | G-R  |
| TNFa vs. Butyrate | 250pg/mL vs. 1mM      | 32.33  | No | ns | G-S  |
| TNFa vs. Butyrate | 250pg/mL vs. 2.5mM    | 15     | No | ns | G-T  |
| TNFa vs. Butyrate | 250pg/mL vs. 5mM      | -7.333 | No | ns | G-U  |
| TNFa vs. Butyrate | 250pg/mL vs. 7.5mM    | -5     | No | ns | G-V  |
| TNFa vs. Butyrate | 250pg/mL vs. 10mM     | -11.33 | No | ns | G-W  |
| TNFa vs. Butyrate | 250pg/mL vs. 25mM     | 2.333  | No | ns | G-X  |
| TNFa vs. Combo    | 250pg/mL vs. 50pg/mL  | 30.33  | No | ns | G-Y  |
| TNFa vs. Combo    | 250pg/mL vs. 150pg/mL | 25     | No | ns | G-Z  |
| TNFa vs. Combo    | 250pg/mL vs. 250pg/mL | 20.67  | No | ns | G-AA |
| TNFa vs. Combo    | 250pg/mL vs. 500pg/mL | 8.333  | No | ns | G-AB |
| TNFa vs. Combo    | 250pg/mL vs. 1ng/mL   | -6.333 | No | ns | G-AC |
| TNFa vs. TNFa     | 500pg/mL vs. 1ng/mL   | -3     | No | ns | H-I  |
| TNFa vs. TNFa     | 500pg/mL vs. 2.5ng/mL | -6.333 | No | ns | H-J  |
| TNFa vs. TNFa     | 500pg/mL vs. 5ng/mL   | -10.33 | No | ns | H-K  |
| TNFa vs. TNFa     | 500pg/mL vs. 10ng/mL  | -10.33 | No | ns | H-L  |
| TNFa vs. Butyrate | 500pg/mL vs. 50µM     | 57     | No | ns | H-M  |
| TNFa vs. Butyrate | 500pg/mL vs. 75µM     | 62.33  | No | ns | H-N  |
| TNFa vs. Butyrate | 500pg/mL vs. 100µM    | 69.67  | No | ns | H-O  |
| TNFa vs. Butyrate | 500pg/mL vs. 250µM    | 71     | No | ns | H-P  |
| TNFa vs. Butyrate | 500pg/mL vs. 500µM    | 62.67  | No | ns | H-Q  |
| TNFa vs. Butyrate | 500pg/mL vs. 750µM    | 57.33  | No | ns | H-R  |
| TNFa vs. Butyrate | 500pg/mL vs. 1mM      | 47.67  | No | ns | H-S  |
| TNFa vs. Butyrate | 500pg/mL vs. 2.5mM    | 30.33  | No | ns | H-T  |

|                   |                       |        |    |    |      |
|-------------------|-----------------------|--------|----|----|------|
| TNFa vs. Butyrate | 500pg/mL vs. 5mM      | 8      | No | ns | H-U  |
| TNFa vs. Butyrate | 500pg/mL vs. 7.5mM    | 10.33  | No | ns | H-V  |
| TNFa vs. Butyrate | 500pg/mL vs. 10mM     | 4      | No | ns | H-W  |
| TNFa vs. Butyrate | 500pg/mL vs. 25mM     | 17.67  | No | ns | H-X  |
| TNFa vs. Combo    | 500pg/mL vs. 50pg/mL  | 45.67  | No | ns | H-Y  |
| TNFa vs. Combo    | 500pg/mL vs. 150pg/mL | 40.33  | No | ns | H-Z  |
| TNFa vs. Combo    | 500pg/mL vs. 250pg/mL | 36     | No | ns | H-AA |
| TNFa vs. Combo    | 500pg/mL vs. 500pg/mL | 23.67  | No | ns | H-AB |
| TNFa vs. Combo    | 500pg/mL vs. 1ng/mL   | 9      | No | ns | H-AC |
| TNFa vs. TNFa     | 1ng/mL vs. 2.5ng/mL   | -3.333 | No | ns | I-J  |
| TNFa vs. TNFa     | 1ng/mL vs. 5ng/mL     | -7.333 | No | ns | I-K  |
| TNFa vs. TNFa     | 1ng/mL vs. 10ng/mL    | -7.333 | No | ns | I-L  |
| TNFa vs. Butyrate | 1ng/mL vs. 50μM       | 60     | No | ns | I-M  |
| TNFa vs. Butyrate | 1ng/mL vs. 75μM       | 65.33  | No | ns | I-N  |
| TNFa vs. Butyrate | 1ng/mL vs. 100μM      | 72.67  | No | ns | I-O  |
| TNFa vs. Butyrate | 1ng/mL vs. 250μM      | 74     | No | ns | I-P  |
| TNFa vs. Butyrate | 1ng/mL vs. 500μM      | 65.67  | No | ns | I-Q  |
| TNFa vs. Butyrate | 1ng/mL vs. 750μM      | 60.33  | No | ns | I-R  |
| TNFa vs. Butyrate | 1ng/mL vs. 1mM        | 50.67  | No | ns | I-S  |
| TNFa vs. Butyrate | 1ng/mL vs. 2.5mM      | 33.33  | No | ns | I-T  |
| TNFa vs. Butyrate | 1ng/mL vs. 5mM        | 11     | No | ns | I-U  |
| TNFa vs. Butyrate | 1ng/mL vs. 7.5mM      | 13.33  | No | ns | I-V  |
| TNFa vs. Butyrate | 1ng/mL vs. 10mM       | 7      | No | ns | I-W  |
| TNFa vs. Butyrate | 1ng/mL vs. 25mM       | 20.67  | No | ns | I-X  |
| TNFa vs. Combo    | 1ng/mL vs. 50pg/mL    | 48.67  | No | ns | I-Y  |
| TNFa vs. Combo    | 1ng/mL vs. 150pg/mL   | 43.33  | No | ns | I-Z  |
| TNFa vs. Combo    | 1ng/mL vs. 250pg/mL   | 39     | No | ns | I-AA |
| TNFa vs. Combo    | 1ng/mL vs. 500pg/mL   | 26.67  | No | ns | I-AB |
| TNFa vs. Combo    | 1ng/mL vs. 1ng/mL     | 12     | No | ns | I-AC |
| TNFa vs. TNFa     | 2.5ng/mL vs. 5ng/mL   | -4     | No | ns | J-K  |
| TNFa vs. TNFa     | 2.5ng/mL vs. 10ng/mL  | -4     | No | ns | J-L  |
| TNFa vs. Butyrate | 2.5ng/mL vs. 50μM     | 63.33  | No | ns | J-M  |
| TNFa vs. Butyrate | 2.5ng/mL vs. 75μM     | 68.67  | No | ns | J-N  |
| TNFa vs. Butyrate | 2.5ng/mL vs. 100μM    | 76     | No | ns | J-O  |
| TNFa vs. Butyrate | 2.5ng/mL vs. 250μM    | 77.33  | No | ns | J-P  |
| TNFa vs. Butyrate | 2.5ng/mL vs. 500μM    | 69     | No | ns | J-Q  |
| TNFa vs. Butyrate | 2.5ng/mL vs. 750μM    | 63.67  | No | ns | J-R  |
| TNFa vs. Butyrate | 2.5ng/mL vs. 1mM      | 54     | No | ns | J-S  |
| TNFa vs. Butyrate | 2.5ng/mL vs. 2.5mM    | 36.67  | No | ns | J-T  |
| TNFa vs. Butyrate | 2.5ng/mL vs. 5mM      | 14.33  | No | ns | J-U  |
| TNFa vs. Butyrate | 2.5ng/mL vs. 7.5mM    | 16.67  | No | ns | J-V  |
| TNFa vs. Butyrate | 2.5ng/mL vs. 10mM     | 10.33  | No | ns | J-W  |
| TNFa vs. Butyrate | 2.5ng/mL vs. 25mM     | 24     | No | ns | J-X  |
| TNFa vs. Combo    | 2.5ng/mL vs. 50pg/mL  | 52     | No | ns | J-Y  |
| TNFa vs. Combo    | 2.5ng/mL vs. 150pg/mL | 46.67  | No | ns | J-Z  |
| TNFa vs. Combo    | 2.5ng/mL vs. 250pg/mL | 42.33  | No | ns | J-AA |
| TNFa vs. Combo    | 2.5ng/mL vs. 500pg/mL | 30     | No | ns | J-AB |

|                       |                      |        |    |    |      |
|-----------------------|----------------------|--------|----|----|------|
| TNFa vs. Combo        | 2.5ng/mL vs. 1ng/mL  | 15.33  | No | ns | J-AC |
| TNFa vs. TNFa         | 5ng/mL vs. 10ng/mL   | 0      | No | ns | K-L  |
| TNFa vs. Butyrate     | 5ng/mL vs. 50μM      | 67.33  | No | ns | K-M  |
| TNFa vs. Butyrate     | 5ng/mL vs. 75μM      | 72.67  | No | ns | K-N  |
| TNFa vs. Butyrate     | 5ng/mL vs. 100μM     | 80     | No | ns | K-O  |
| TNFa vs. Butyrate     | 5ng/mL vs. 250μM     | 81.33  | No | ns | K-P  |
| TNFa vs. Butyrate     | 5ng/mL vs. 500μM     | 73     | No | ns | K-Q  |
| TNFa vs. Butyrate     | 5ng/mL vs. 750μM     | 67.67  | No | ns | K-R  |
| TNFa vs. Butyrate     | 5ng/mL vs. 1mM       | 58     | No | ns | K-S  |
| TNFa vs. Butyrate     | 5ng/mL vs. 2.5mM     | 40.67  | No | ns | K-T  |
| TNFa vs. Butyrate     | 5ng/mL vs. 5mM       | 18.33  | No | ns | K-U  |
| TNFa vs. Butyrate     | 5ng/mL vs. 7.5mM     | 20.67  | No | ns | K-V  |
| TNFa vs. Butyrate     | 5ng/mL vs. 10mM      | 14.33  | No | ns | K-W  |
| TNFa vs. Butyrate     | 5ng/mL vs. 25mM      | 28     | No | ns | K-X  |
| TNFa vs. Combo        | 5ng/mL vs. 50pg/mL   | 56     | No | ns | K-Y  |
| TNFa vs. Combo        | 5ng/mL vs. 150pg/mL  | 50.67  | No | ns | K-Z  |
| TNFa vs. Combo        | 5ng/mL vs. 250pg/mL  | 46.33  | No | ns | K-AA |
| TNFa vs. Combo        | 5ng/mL vs. 500pg/mL  | 34     | No | ns | K-AB |
| TNFa vs. Combo        | 5ng/mL vs. 1ng/mL    | 19.33  | No | ns | K-AC |
| TNFa vs. Butyrate     | 10ng/mL vs. 50μM     | 67.33  | No | ns | L-M  |
| TNFa vs. Butyrate     | 10ng/mL vs. 75μM     | 72.67  | No | ns | L-N  |
| TNFa vs. Butyrate     | 10ng/mL vs. 100μM    | 80     | No | ns | L-O  |
| TNFa vs. Butyrate     | 10ng/mL vs. 250μM    | 81.33  | No | ns | L-P  |
| TNFa vs. Butyrate     | 10ng/mL vs. 500μM    | 73     | No | ns | L-Q  |
| TNFa vs. Butyrate     | 10ng/mL vs. 750μM    | 67.67  | No | ns | L-R  |
| TNFa vs. Butyrate     | 10ng/mL vs. 1mM      | 58     | No | ns | L-S  |
| TNFa vs. Butyrate     | 10ng/mL vs. 2.5mM    | 40.67  | No | ns | L-T  |
| TNFa vs. Butyrate     | 10ng/mL vs. 5mM      | 18.33  | No | ns | L-U  |
| TNFa vs. Butyrate     | 10ng/mL vs. 7.5mM    | 20.67  | No | ns | L-V  |
| TNFa vs. Butyrate     | 10ng/mL vs. 10mM     | 14.33  | No | ns | L-W  |
| TNFa vs. Butyrate     | 10ng/mL vs. 25mM     | 28     | No | ns | L-X  |
| TNFa vs. Combo        | 10ng/mL vs. 50pg/mL  | 56     | No | ns | L-Y  |
| TNFa vs. Combo        | 10ng/mL vs. 150pg/mL | 50.67  | No | ns | L-Z  |
| TNFa vs. Combo        | 10ng/mL vs. 250pg/mL | 46.33  | No | ns | L-AA |
| TNFa vs. Combo        | 10ng/mL vs. 500pg/mL | 34     | No | ns | L-AB |
| TNFa vs. Combo        | 10ng/mL vs. 1ng/mL   | 19.33  | No | ns | L-AC |
| Butyrate vs. Butyrate | 50μM vs. 75μM        | 5.333  | No | ns | M-N  |
| Butyrate vs. Butyrate | 50μM vs. 100μM       | 12.67  | No | ns | M-O  |
| Butyrate vs. Butyrate | 50μM vs. 250μM       | 14     | No | ns | M-P  |
| Butyrate vs. Butyrate | 50μM vs. 500μM       | 5.667  | No | ns | M-Q  |
| Butyrate vs. Butyrate | 50μM vs. 750μM       | 0.3333 | No | ns | M-R  |
| Butyrate vs. Butyrate | 50μM vs. 1mM         | -9.333 | No | ns | M-S  |
| Butyrate vs. Butyrate | 50μM vs. 2.5mM       | -26.67 | No | ns | M-T  |
| Butyrate vs. Butyrate | 50μM vs. 5mM         | -49    | No | ns | M-U  |
| Butyrate vs. Butyrate | 50μM vs. 7.5mM       | -46.67 | No | ns | M-V  |
| Butyrate vs. Butyrate | 50μM vs. 10mM        | -53    | No | ns | M-W  |
| Butyrate vs. Butyrate | 50μM vs. 25mM        | -39.33 | No | ns | M-X  |

|                       |                    |        |    |    |      |
|-----------------------|--------------------|--------|----|----|------|
| Butyrate vs. Combo    | 50µM vs. 50pg/mL   | -11.33 | No | ns | M-Y  |
| Butyrate vs. Combo    | 50µM vs. 150pg/mL  | -16.67 | No | ns | M-Z  |
| Butyrate vs. Combo    | 50µM vs. 250pg/mL  | -21    | No | ns | M-AA |
| Butyrate vs. Combo    | 50µM vs. 500pg/mL  | -33.33 | No | ns | M-AB |
| Butyrate vs. Combo    | 50µM vs. 1ng/mL    | -48    | No | ns | M-AC |
| Butyrate vs. Butyrate | 75µM vs. 100µM     | 7.333  | No | ns | N-O  |
| Butyrate vs. Butyrate | 75µM vs. 250µM     | 8.667  | No | ns | N-P  |
| Butyrate vs. Butyrate | 75µM vs. 500µM     | 0.3333 | No | ns | N-Q  |
| Butyrate vs. Butyrate | 75µM vs. 750µM     | -5     | No | ns | N-R  |
| Butyrate vs. Butyrate | 75µM vs. 1mM       | -14.67 | No | ns | N-S  |
| Butyrate vs. Butyrate | 75µM vs. 2.5mM     | -32    | No | ns | N-T  |
| Butyrate vs. Butyrate | 75µM vs. 5mM       | -54.33 | No | ns | N-U  |
| Butyrate vs. Butyrate | 75µM vs. 7.5mM     | -52    | No | ns | N-V  |
| Butyrate vs. Butyrate | 75µM vs. 10mM      | -58.33 | No | ns | N-W  |
| Butyrate vs. Butyrate | 75µM vs. 25mM      | -44.67 | No | ns | N-X  |
| Butyrate vs. Combo    | 75µM vs. 50pg/mL   | -16.67 | No | ns | N-Y  |
| Butyrate vs. Combo    | 75µM vs. 150pg/mL  | -22    | No | ns | N-Z  |
| Butyrate vs. Combo    | 75µM vs. 250pg/mL  | -26.33 | No | ns | N-AA |
| Butyrate vs. Combo    | 75µM vs. 500pg/mL  | -38.67 | No | ns | N-AB |
| Butyrate vs. Combo    | 75µM vs. 1ng/mL    | -53.33 | No | ns | N-AC |
| Butyrate vs. Butyrate | 100µM vs. 250µM    | 1.333  | No | ns | O-P  |
| Butyrate vs. Butyrate | 100µM vs. 500µM    | -7     | No | ns | O-Q  |
| Butyrate vs. Butyrate | 100µM vs. 750µM    | -12.33 | No | ns | O-R  |
| Butyrate vs. Butyrate | 100µM vs. 1mM      | -22    | No | ns | O-S  |
| Butyrate vs. Butyrate | 100µM vs. 2.5mM    | -39.33 | No | ns | O-T  |
| Butyrate vs. Butyrate | 100µM vs. 5mM      | -61.67 | No | ns | O-U  |
| Butyrate vs. Butyrate | 100µM vs. 7.5mM    | -59.33 | No | ns | O-V  |
| Butyrate vs. Butyrate | 100µM vs. 10mM     | -65.67 | No | ns | O-W  |
| Butyrate vs. Butyrate | 100µM vs. 25mM     | -52    | No | ns | O-X  |
| Butyrate vs. Combo    | 100µM vs. 50pg/mL  | -24    | No | ns | O-Y  |
| Butyrate vs. Combo    | 100µM vs. 150pg/mL | -29.33 | No | ns | O-Z  |
| Butyrate vs. Combo    | 100µM vs. 250pg/mL | -33.67 | No | ns | O-AA |
| Butyrate vs. Combo    | 100µM vs. 500pg/mL | -46    | No | ns | O-AB |
| Butyrate vs. Combo    | 100µM vs. 1ng/mL   | -60.67 | No | ns | O-AC |
| Butyrate vs. Butyrate | 250µM vs. 500µM    | -8.333 | No | ns | P-Q  |
| Butyrate vs. Butyrate | 250µM vs. 750µM    | -13.67 | No | ns | P-R  |
| Butyrate vs. Butyrate | 250µM vs. 1mM      | -23.33 | No | ns | P-S  |
| Butyrate vs. Butyrate | 250µM vs. 2.5mM    | -40.67 | No | ns | P-T  |
| Butyrate vs. Butyrate | 250µM vs. 5mM      | -63    | No | ns | P-U  |
| Butyrate vs. Butyrate | 250µM vs. 7.5mM    | -60.67 | No | ns | P-V  |
| Butyrate vs. Butyrate | 250µM vs. 10mM     | -67    | No | ns | P-W  |
| Butyrate vs. Butyrate | 250µM vs. 25mM     | -53.33 | No | ns | P-X  |
| Butyrate vs. Combo    | 250µM vs. 50pg/mL  | -25.33 | No | ns | P-Y  |
| Butyrate vs. Combo    | 250µM vs. 150pg/mL | -30.67 | No | ns | P-Z  |
| Butyrate vs. Combo    | 250µM vs. 250pg/mL | -35    | No | ns | P-AA |
| Butyrate vs. Combo    | 250µM vs. 500pg/mL | -47.33 | No | ns | P-AB |
| Butyrate vs. Combo    | 250µM vs. 1ng/mL   | -62    | No | ns | P-AC |

|                       |                    |        |    |    |      |
|-----------------------|--------------------|--------|----|----|------|
| Butyrate vs. Butyrate | 500µM vs. 750µM    | -5.333 | No | ns | Q-R  |
| Butyrate vs. Butyrate | 500µM vs. 1mM      | -15    | No | ns | Q-S  |
| Butyrate vs. Butyrate | 500µM vs. 2.5mM    | -32.33 | No | ns | Q-T  |
| Butyrate vs. Butyrate | 500µM vs. 5mM      | -54.67 | No | ns | Q-U  |
| Butyrate vs. Butyrate | 500µM vs. 7.5mM    | -52.33 | No | ns | Q-V  |
| Butyrate vs. Butyrate | 500µM vs. 10mM     | -58.67 | No | ns | Q-W  |
| Butyrate vs. Butyrate | 500µM vs. 25mM     | -45    | No | ns | Q-X  |
| Butyrate vs. Combo    | 500µM vs. 50pg/mL  | -17    | No | ns | Q-Y  |
| Butyrate vs. Combo    | 500µM vs. 150pg/mL | -22.33 | No | ns | Q-Z  |
| Butyrate vs. Combo    | 500µM vs. 250pg/mL | -26.67 | No | ns | Q-AA |
| Butyrate vs. Combo    | 500µM vs. 500pg/mL | -39    | No | ns | Q-AB |
| Butyrate vs. Combo    | 500µM vs. 1ng/mL   | -53.67 | No | ns | Q-AC |
| Butyrate vs. Butyrate | 750µM vs. 1mM      | -9.667 | No | ns | R-S  |
| Butyrate vs. Butyrate | 750µM vs. 2.5mM    | -27    | No | ns | R-T  |
| Butyrate vs. Butyrate | 750µM vs. 5mM      | -49.33 | No | ns | R-U  |
| Butyrate vs. Butyrate | 750µM vs. 7.5mM    | -47    | No | ns | R-V  |
| Butyrate vs. Butyrate | 750µM vs. 10mM     | -53.33 | No | ns | R-W  |
| Butyrate vs. Butyrate | 750µM vs. 25mM     | -39.67 | No | ns | R-X  |
| Butyrate vs. Combo    | 750µM vs. 50pg/mL  | -11.67 | No | ns | R-Y  |
| Butyrate vs. Combo    | 750µM vs. 150pg/mL | -17    | No | ns | R-Z  |
| Butyrate vs. Combo    | 750µM vs. 250pg/mL | -21.33 | No | ns | R-AA |
| Butyrate vs. Combo    | 750µM vs. 500pg/mL | -33.67 | No | ns | R-AB |
| Butyrate vs. Combo    | 750µM vs. 1ng/mL   | -48.33 | No | ns | R-AC |
| Butyrate vs. Butyrate | 1mM vs. 2.5mM      | -17.33 | No | ns | S-T  |
| Butyrate vs. Butyrate | 1mM vs. 5mM        | -39.67 | No | ns | S-U  |
| Butyrate vs. Butyrate | 1mM vs. 7.5mM      | -37.33 | No | ns | S-V  |
| Butyrate vs. Butyrate | 1mM vs. 10mM       | -43.67 | No | ns | S-W  |
| Butyrate vs. Butyrate | 1mM vs. 25mM       | -30    | No | ns | S-X  |
| Butyrate vs. Combo    | 1mM vs. 50pg/mL    | -2     | No | ns | S-Y  |
| Butyrate vs. Combo    | 1mM vs. 150pg/mL   | -7.333 | No | ns | S-Z  |
| Butyrate vs. Combo    | 1mM vs. 250pg/mL   | -11.67 | No | ns | S-AA |
| Butyrate vs. Combo    | 1mM vs. 500pg/mL   | -24    | No | ns | S-AB |
| Butyrate vs. Combo    | 1mM vs. 1ng/mL     | -38.67 | No | ns | S-AC |
| Butyrate vs. Butyrate | 2.5mM vs. 5mM      | -22.33 | No | ns | T-U  |
| Butyrate vs. Butyrate | 2.5mM vs. 7.5mM    | -20    | No | ns | T-V  |
| Butyrate vs. Butyrate | 2.5mM vs. 10mM     | -26.33 | No | ns | T-W  |
| Butyrate vs. Butyrate | 2.5mM vs. 25mM     | -12.67 | No | ns | T-X  |
| Butyrate vs. Combo    | 2.5mM vs. 50pg/mL  | 15.33  | No | ns | T-Y  |
| Butyrate vs. Combo    | 2.5mM vs. 150pg/mL | 10     | No | ns | T-Z  |
| Butyrate vs. Combo    | 2.5mM vs. 250pg/mL | 5.667  | No | ns | T-AA |
| Butyrate vs. Combo    | 2.5mM vs. 500pg/mL | -6.667 | No | ns | T-AB |
| Butyrate vs. Combo    | 2.5mM vs. 1ng/mL   | -21.33 | No | ns | T-AC |
| Butyrate vs. Butyrate | 5mM vs. 7.5mM      | 2.333  | No | ns | U-V  |
| Butyrate vs. Butyrate | 5mM vs. 10mM       | -4     | No | ns | U-W  |
| Butyrate vs. Butyrate | 5mM vs. 25mM       | 9.667  | No | ns | U-X  |
| Butyrate vs. Combo    | 5mM vs. 50pg/mL    | 37.67  | No | ns | U-Y  |
| Butyrate vs. Combo    | 5mM vs. 150pg/mL   | 32.33  | No | ns | U-Z  |

|                       |                       |        |    |    |       |
|-----------------------|-----------------------|--------|----|----|-------|
| Butyrate vs. Combo    | 5mM vs. 250pg/mL      | 28     | No | ns | U-AA  |
| Butyrate vs. Combo    | 5mM vs. 500pg/mL      | 15.67  | No | ns | U-AB  |
| Butyrate vs. Combo    | 5mM vs. 1ng/mL        | 1      | No | ns | U-AC  |
| Butyrate vs. Butyrate | 7.5mM vs. 10mM        | -6.333 | No | ns | V-W   |
| Butyrate vs. Butyrate | 7.5mM vs. 25mM        | 7.333  | No | ns | V-X   |
| Butyrate vs. Combo    | 7.5mM vs. 50pg/mL     | 35.33  | No | ns | V-Y   |
| Butyrate vs. Combo    | 7.5mM vs. 150pg/mL    | 30     | No | ns | V-Z   |
| Butyrate vs. Combo    | 7.5mM vs. 250pg/mL    | 25.67  | No | ns | V-AA  |
| Butyrate vs. Combo    | 7.5mM vs. 500pg/mL    | 13.33  | No | ns | V-AB  |
| Butyrate vs. Combo    | 7.5mM vs. 1ng/mL      | -1.333 | No | ns | V-AC  |
| Butyrate vs. Butyrate | 10mM vs. 25mM         | 13.67  | No | ns | W-X   |
| Butyrate vs. Combo    | 10mM vs. 50pg/mL      | 41.67  | No | ns | W-Y   |
| Butyrate vs. Combo    | 10mM vs. 150pg/mL     | 36.33  | No | ns | W-Z   |
| Butyrate vs. Combo    | 10mM vs. 250pg/mL     | 32     | No | ns | W-AA  |
| Butyrate vs. Combo    | 10mM vs. 500pg/mL     | 19.67  | No | ns | W-AB  |
| Butyrate vs. Combo    | 10mM vs. 1ng/mL       | 5      | No | ns | W-AC  |
| Butyrate vs. Combo    | 25mM vs. 50pg/mL      | 28     | No | ns | X-Y   |
| Butyrate vs. Combo    | 25mM vs. 150pg/mL     | 22.67  | No | ns | X-Z   |
| Butyrate vs. Combo    | 25mM vs. 250pg/mL     | 18.33  | No | ns | X-AA  |
| Butyrate vs. Combo    | 25mM vs. 500pg/mL     | 6      | No | ns | X-AB  |
| Butyrate vs. Combo    | 25mM vs. 1ng/mL       | -8.667 | No | ns | X-AC  |
| Combo vs. Combo       | 50pg/mL vs. 150pg/mL  | -5.333 | No | ns | Y-Z   |
| Combo vs. Combo       | 50pg/mL vs. 250pg/mL  | -9.667 | No | ns | Y-AA  |
| Combo vs. Combo       | 50pg/mL vs. 500pg/mL  | -22    | No | ns | Y-AB  |
| Combo vs. Combo       | 50pg/mL vs. 1ng/mL    | -36.67 | No | ns | Y-AC  |
| Combo vs. Combo       | 150pg/mL vs. 250pg/mL | -4.333 | No | ns | Z-AA  |
| Combo vs. Combo       | 150pg/mL vs. 500pg/mL | -16.67 | No | ns | Z-AB  |
| Combo vs. Combo       | 150pg/mL vs. 1ng/mL   | -31.33 | No | ns | Z-AC  |
| Combo vs. Combo       | 250pg/mL vs. 500pg/mL | -12.33 | No | ns | AA-AB |
| Combo vs. Combo       | 250pg/mL vs. 1ng/mL   | -27    | No | ns | AA-AC |
| Combo vs. Combo       | 500pg/mL vs. 1ng/mL   | -14.67 |    |    |       |

| Dunn's multiple comparisons test | Mean rank diff. | Significant | Summary |
|----------------------------------|-----------------|-------------|---------|
| Media vs. 8µM FCCP               | 50.17           | No          | ns      |
| Media vs. 10pg/mL TNFa           | -21.67          | No          | ns      |
| Media vs. 25pg/mL TNFa           | -21.83          | No          | ns      |
| Media vs. 50pg/mL TNFa           | 12              | No          | ns      |
| Media vs. 100pg/mL TNFa          | 17.33           | No          | ns      |
| Media vs. 250pg/mL TNFa          | 72              | No          | ns      |
| Media vs. 10µM Butyrate          | -43.17          | No          | ns      |
| Media vs. 25µM Butyrate          | -16.83          | No          | ns      |
| Media vs. 50µM Butyrate          | -43             | No          | ns      |
| Media vs. 100µM Butyrate         | -25.67          | No          | ns      |
| Media vs. 250µM Butyrate         | 21.17           | No          | ns      |
| Media vs. 500µM Butyrate         | 58              | No          | ns      |
| Media vs. 10pg/mL Combo          | -36.33          | No          | ns      |
| Media vs. 25pg/mL Combo          | -3.333          | No          | ns      |
| Media vs. 50pg/mL Combo          | 5.667           | No          | ns      |
| Media vs. 100pg/mL Combo         | 34.5            | No          | ns      |
| Media vs. 250pg/mL Combo         | 80.5            | No          | ns      |
| Media vs. 10pg/mL Combo          | 39.83           | No          | ns      |
| Media vs. 25pg/mL Combo          | 39.33           | No          | ns      |
| Media vs. 50pg/mL Combo          | 52.33           | No          | ns      |
| Media vs. 100pg/mL Combo         | 63.83           | No          | ns      |
| Media vs. 250pg/mL Combo         | 79.17           | No          | ns      |
| 8µM FCCP vs. 10pg/mL TNFa        | -71.83          | No          | ns      |
| 8µM FCCP vs. 25pg/mL TNFa        | -72             | No          | ns      |
| 8µM FCCP vs. 50pg/mL TNFa        | -38.17          | No          | ns      |
| 8µM FCCP vs. 100pg/mL TNFa       | -32.83          | No          | ns      |
| 8µM FCCP vs. 250pg/mL TNFa       | 21.83           | No          | ns      |
| 8µM FCCP vs. 10µM Butyrate       | -93.33          | Yes         | *       |
| 8µM FCCP vs. 25µM Butyrate       | -67             | No          | ns      |
| 8µM FCCP vs. 50µM Butyrate       | -93.17          | Yes         | *       |
| 8µM FCCP vs. 100µM Butyrate      | -75.83          | No          | ns      |
| 8µM FCCP vs. 250µM Butyrate      | -29             | No          | ns      |
| 8µM FCCP vs. 500µM Butyrate      | 7.833           | No          | ns      |
| 8µM FCCP vs. 10pg/mL Combo       | -86.5           | Yes         | *       |
| 8µM FCCP vs. 25pg/mL Combo       | -53.5           | No          | ns      |
| 8µM FCCP vs. 50pg/mL Combo       | -44.5           | No          | ns      |
| 8µM FCCP vs. 100pg/mL Combo      | -15.67          | No          | ns      |
| 8µM FCCP vs. 250pg/mL Combo      | 30.33           | No          | ns      |
| 8µM FCCP vs. 10pg/mL Combo       | -10.33          | No          | ns      |
| 8µM FCCP vs. 25pg/mL Combo       | -10.83          | No          | ns      |
| 8µM FCCP vs. 50pg/mL Combo       | 2.167           | No          | ns      |
| 8µM FCCP vs. 100pg/mL Combo      | 13.67           | No          | ns      |
| 8µM FCCP vs. 250pg/mL Combo      | 29              | No          | ns      |
| 10pg/mL TNFa vs. 25pg/mL TNFa    | -0.1667         | No          | ns      |
| 10pg/mL TNFa vs. 50pg/mL TNFa    | 33.67           | No          | ns      |
| 10pg/mL TNFa vs. 100pg/mL TNFa   | 39              | No          | ns      |

|                                 |           |    |
|---------------------------------|-----------|----|
| 10pg/mL TNFa vs. 250pg/mL TNFa  | 93.67 Yes | *  |
| 10pg/mL TNFa vs. 10µM Butyrate  | -21.5 No  | ns |
| 10pg/mL TNFa vs. 25µM Butyrate  | 4.833 No  | ns |
| 10pg/mL TNFa vs. 50µM Butyrate  | -21.33 No | ns |
| 10pg/mL TNFa vs. 100µM Butyrate | -4 No     | ns |
| 10pg/mL TNFa vs. 250µM Butyrate | 42.83 No  | ns |
| 10pg/mL TNFa vs. 500µM Butyrate | 79.67 No  | ns |
| 10pg/mL TNFa vs. 10pg/mL Combo  | -14.67 No | ns |
| 10pg/mL TNFa vs. 25pg/mL Combo  | 18.33 No  | ns |
| 10pg/mL TNFa vs. 50pg/mL Combo  | 27.33 No  | ns |
| 10pg/mL TNFa vs. 100pg/mL Combo | 56.17 No  | ns |
| 10pg/mL TNFa vs. 250pg/mL Combo | 102.2 Yes | ** |
| 10pg/mL TNFa vs. 10pg/mL Combo  | 61.5 No   | ns |
| 10pg/mL TNFa vs. 25pg/mL Combo  | 61 No     | ns |
| 10pg/mL TNFa vs. 50pg/mL Combo  | 74 No     | ns |
| 10pg/mL TNFa vs. 100pg/mL Combo | 85.5 No   | ns |
| 10pg/mL TNFa vs. 250pg/mL Combo | 100.8 Yes | ** |
| 25pg/mL TNFa vs. 50pg/mL TNFa   | 33.83 No  | ns |
| 25pg/mL TNFa vs. 100pg/mL TNFa  | 39.17 No  | ns |
| 25pg/mL TNFa vs. 250pg/mL TNFa  | 93.83 Yes | *  |
| 25pg/mL TNFa vs. 10µM Butyrate  | -21.33 No | ns |
| 25pg/mL TNFa vs. 25µM Butyrate  | 5 No      | ns |
| 25pg/mL TNFa vs. 50µM Butyrate  | -21.17 No | ns |
| 25pg/mL TNFa vs. 100µM Butyrate | -3.833 No | ns |
| 25pg/mL TNFa vs. 250µM Butyrate | 43 No     | ns |
| 25pg/mL TNFa vs. 500µM Butyrate | 79.83 No  | ns |
| 25pg/mL TNFa vs. 10pg/mL Combo  | -14.5 No  | ns |
| 25pg/mL TNFa vs. 25pg/mL Combo  | 18.5 No   | ns |
| 25pg/mL TNFa vs. 50pg/mL Combo  | 27.5 No   | ns |
| 25pg/mL TNFa vs. 100pg/mL Combo | 56.33 No  | ns |
| 25pg/mL TNFa vs. 250pg/mL Combo | 102.3 Yes | ** |
| 25pg/mL TNFa vs. 10pg/mL Combo  | 61.67 No  | ns |
| 25pg/mL TNFa vs. 25pg/mL Combo  | 61.17 No  | ns |
| 25pg/mL TNFa vs. 50pg/mL Combo  | 74.17 No  | ns |
| 25pg/mL TNFa vs. 100pg/mL Combo | 85.67 No  | ns |
| 25pg/mL TNFa vs. 250pg/mL Combo | 101 Yes   | ** |
| 50pg/mL TNFa vs. 100pg/mL TNFa  | 5.333 No  | ns |
| 50pg/mL TNFa vs. 250pg/mL TNFa  | 60 No     | ns |
| 50pg/mL TNFa vs. 10µM Butyrate  | -55.17 No | ns |
| 50pg/mL TNFa vs. 25µM Butyrate  | -28.83 No | ns |
| 50pg/mL TNFa vs. 50µM Butyrate  | -55 No    | ns |
| 50pg/mL TNFa vs. 100µM Butyrate | -37.67 No | ns |
| 50pg/mL TNFa vs. 250µM Butyrate | 9.167 No  | ns |
| 50pg/mL TNFa vs. 500µM Butyrate | 46 No     | ns |
| 50pg/mL TNFa vs. 10pg/mL Combo  | -48.33 No | ns |
| 50pg/mL TNFa vs. 25pg/mL Combo  | -15.33 No | ns |
| 50pg/mL TNFa vs. 50pg/mL Combo  | -6.333 No | ns |

|                                  |            |     |
|----------------------------------|------------|-----|
| 50pg/mL TNFa vs. 100pg/mL Combo  | 22.5 No    | ns  |
| 50pg/mL TNFa vs. 250pg/mL Combo  | 68.5 No    | ns  |
| 50pg/mL TNFa vs. 10pg/mL Combo   | 27.83 No   | ns  |
| 50pg/mL TNFa vs. 25pg/mL Combo   | 27.33 No   | ns  |
| 50pg/mL TNFa vs. 50pg/mL Combo   | 40.33 No   | ns  |
| 50pg/mL TNFa vs. 100pg/mL Combo  | 51.83 No   | ns  |
| 50pg/mL TNFa vs. 250pg/mL Combo  | 67.17 No   | ns  |
| 100pg/mL TNFa vs. 250pg/mL TNFa  | 54.67 No   | ns  |
| 100pg/mL TNFa vs. 10μM Butyrate  | -60.5 No   | ns  |
| 100pg/mL TNFa vs. 25μM Butyrate  | -34.17 No  | ns  |
| 100pg/mL TNFa vs. 50μM Butyrate  | -60.33 No  | ns  |
| 100pg/mL TNFa vs. 100μM Butyrate | -43 No     | ns  |
| 100pg/mL TNFa vs. 250μM Butyrate | 3.833 No   | ns  |
| 100pg/mL TNFa vs. 500μM Butyrate | 40.67 No   | ns  |
| 100pg/mL TNFa vs. 10pg/mL Combo  | -53.67 No  | ns  |
| 100pg/mL TNFa vs. 25pg/mL Combo  | -20.67 No  | ns  |
| 100pg/mL TNFa vs. 50pg/mL Combo  | -11.67 No  | ns  |
| 100pg/mL TNFa vs. 100pg/mL Combo | 17.17 No   | ns  |
| 100pg/mL TNFa vs. 250pg/mL Combo | 63.17 No   | ns  |
| 100pg/mL TNFa vs. 10pg/mL Combo  | 22.5 No    | ns  |
| 100pg/mL TNFa vs. 25pg/mL Combo  | 22 No      | ns  |
| 100pg/mL TNFa vs. 50pg/mL Combo  | 35 No      | ns  |
| 100pg/mL TNFa vs. 100pg/mL Combo | 46.5 No    | ns  |
| 100pg/mL TNFa vs. 250pg/mL Combo | 61.83 No   | ns  |
| 250pg/mL TNFa vs. 10μM Butyrate  | -115.2 Yes | *** |
| 250pg/mL TNFa vs. 25μM Butyrate  | -88.83 Yes | *   |
| 250pg/mL TNFa vs. 50μM Butyrate  | -115 Yes   | *** |
| 250pg/mL TNFa vs. 100μM Butyrate | -97.67 Yes | **  |
| 250pg/mL TNFa vs. 250μM Butyrate | -50.83 No  | ns  |
| 250pg/mL TNFa vs. 500μM Butyrate | -14 No     | ns  |
| 250pg/mL TNFa vs. 10pg/mL Combo  | -108.3 Yes | *** |
| 250pg/mL TNFa vs. 25pg/mL Combo  | -75.33 No  | ns  |
| 250pg/mL TNFa vs. 50pg/mL Combo  | -66.33 No  | ns  |
| 250pg/mL TNFa vs. 100pg/mL Combo | -37.5 No   | ns  |
| 250pg/mL TNFa vs. 250pg/mL Combo | 8.5 No     | ns  |
| 250pg/mL TNFa vs. 10pg/mL Combo  | -32.17 No  | ns  |
| 250pg/mL TNFa vs. 25pg/mL Combo  | -32.67 No  | ns  |
| 250pg/mL TNFa vs. 50pg/mL Combo  | -19.67 No  | ns  |
| 250pg/mL TNFa vs. 100pg/mL Combo | -8.167 No  | ns  |
| 250pg/mL TNFa vs. 250pg/mL Combo | 7.167 No   | ns  |
| 10μM Butyrate vs. 25μM Butyrate  | 26.33 No   | ns  |
| 10μM Butyrate vs. 50μM Butyrate  | 0.1667 No  | ns  |
| 10μM Butyrate vs. 100μM Butyrate | 17.5 No    | ns  |
| 10μM Butyrate vs. 250μM Butyrate | 64.33 No   | ns  |
| 10μM Butyrate vs. 500μM Butyrate | 101.2 Yes  | **  |
| 10μM Butyrate vs. 10pg/mL Combo  | 6.833 No   | ns  |
| 10μM Butyrate vs. 25pg/mL Combo  | 39.83 No   | ns  |

|                                   |           |      |
|-----------------------------------|-----------|------|
| 10µM Butyrate vs. 50pg/mL Combo   | 48.83 No  | ns   |
| 10µM Butyrate vs. 100pg/mL Combo  | 77.67 No  | ns   |
| 10µM Butyrate vs. 250pg/mL Combo  | 123.7 Yes | **** |
| 10µM Butyrate vs. 10pg/mL Combo   | 83 No     | ns   |
| 10µM Butyrate vs. 25pg/mL Combo   | 82.5 No   | ns   |
| 10µM Butyrate vs. 50pg/mL Combo   | 95.5 Yes  | **   |
| 10µM Butyrate vs. 100pg/mL Combo  | 107 Yes   | ***  |
| 10µM Butyrate vs. 250pg/mL Combo  | 122.3 Yes | **** |
| 25µM Butyrate vs. 50µM Butyrate   | -26.17 No | ns   |
| 25µM Butyrate vs. 100µM Butyrate  | -8.833 No | ns   |
| 25µM Butyrate vs. 250µM Butyrate  | 38 No     | ns   |
| 25µM Butyrate vs. 500µM Butyrate  | 74.83 No  | ns   |
| 25µM Butyrate vs. 10pg/mL Combo   | -19.5 No  | ns   |
| 25µM Butyrate vs. 25pg/mL Combo   | 13.5 No   | ns   |
| 25µM Butyrate vs. 50pg/mL Combo   | 22.5 No   | ns   |
| 25µM Butyrate vs. 100pg/mL Combo  | 51.33 No  | ns   |
| 25µM Butyrate vs. 250pg/mL Combo  | 97.33 Yes | **   |
| 25µM Butyrate vs. 10pg/mL Combo   | 56.67 No  | ns   |
| 25µM Butyrate vs. 25pg/mL Combo   | 56.17 No  | ns   |
| 25µM Butyrate vs. 50pg/mL Combo   | 69.17 No  | ns   |
| 25µM Butyrate vs. 100pg/mL Combo  | 80.67 No  | ns   |
| 25µM Butyrate vs. 250pg/mL Combo  | 96 Yes    | **   |
| 50µM Butyrate vs. 100µM Butyrate  | 17.33 No  | ns   |
| 50µM Butyrate vs. 250µM Butyrate  | 64.17 No  | ns   |
| 50µM Butyrate vs. 500µM Butyrate  | 101 Yes   | **   |
| 50µM Butyrate vs. 10pg/mL Combo   | 6.667 No  | ns   |
| 50µM Butyrate vs. 25pg/mL Combo   | 39.67 No  | ns   |
| 50µM Butyrate vs. 50pg/mL Combo   | 48.67 No  | ns   |
| 50µM Butyrate vs. 100pg/mL Combo  | 77.5 No   | ns   |
| 50µM Butyrate vs. 250pg/mL Combo  | 123.5 Yes | **** |
| 50µM Butyrate vs. 10pg/mL Combo   | 82.83 No  | ns   |
| 50µM Butyrate vs. 25pg/mL Combo   | 82.33 No  | ns   |
| 50µM Butyrate vs. 50pg/mL Combo   | 95.33 Yes | **   |
| 50µM Butyrate vs. 100pg/mL Combo  | 106.8 Yes | ***  |
| 50µM Butyrate vs. 250pg/mL Combo  | 122.2 Yes | **** |
| 100µM Butyrate vs. 250µM Butyrate | 46.83 No  | ns   |
| 100µM Butyrate vs. 500µM Butyrate | 83.67 No  | ns   |
| 100µM Butyrate vs. 10pg/mL Combo  | -10.67 No | ns   |
| 100µM Butyrate vs. 25pg/mL Combo  | 22.33 No  | ns   |
| 100µM Butyrate vs. 50pg/mL Combo  | 31.33 No  | ns   |
| 100µM Butyrate vs. 100pg/mL Combo | 60.17 No  | ns   |
| 100µM Butyrate vs. 250pg/mL Combo | 106.2 Yes | **   |
| 100µM Butyrate vs. 10pg/mL Combo  | 65.5 No   | ns   |
| 100µM Butyrate vs. 25pg/mL Combo  | 65 No     | ns   |
| 100µM Butyrate vs. 50pg/mL Combo  | 78 No     | ns   |
| 100µM Butyrate vs. 100pg/mL Combo | 89.5 Yes  | *    |
| 100µM Butyrate vs. 250pg/mL Combo | 104.8 Yes | **   |

|                                   |            |     |
|-----------------------------------|------------|-----|
| 250µM Butyrate vs. 500µM Butyrate | 36.83 No   | ns  |
| 250µM Butyrate vs. 10pg/mL Combo  | -57.5 No   | ns  |
| 250µM Butyrate vs. 25pg/mL Combo  | -24.5 No   | ns  |
| 250µM Butyrate vs. 50pg/mL Combo  | -15.5 No   | ns  |
| 250µM Butyrate vs. 100pg/mL Combo | 13.33 No   | ns  |
| 250µM Butyrate vs. 250pg/mL Combo | 59.33 No   | ns  |
| 250µM Butyrate vs. 10pg/mL Combo  | 18.67 No   | ns  |
| 250µM Butyrate vs. 25pg/mL Combo  | 18.17 No   | ns  |
| 250µM Butyrate vs. 50pg/mL Combo  | 31.17 No   | ns  |
| 250µM Butyrate vs. 100pg/mL Combo | 42.67 No   | ns  |
| 250µM Butyrate vs. 250pg/mL Combo | 58 No      | ns  |
| 500µM Butyrate vs. 10pg/mL Combo  | -94.33 Yes | *   |
| 500µM Butyrate vs. 25pg/mL Combo  | -61.33 No  | ns  |
| 500µM Butyrate vs. 50pg/mL Combo  | -52.33 No  | ns  |
| 500µM Butyrate vs. 100pg/mL Combo | -23.5 No   | ns  |
| 500µM Butyrate vs. 250pg/mL Combo | 22.5 No    | ns  |
| 500µM Butyrate vs. 10pg/mL Combo  | -18.17 No  | ns  |
| 500µM Butyrate vs. 25pg/mL Combo  | -18.67 No  | ns  |
| 500µM Butyrate vs. 50pg/mL Combo  | -5.667 No  | ns  |
| 500µM Butyrate vs. 100pg/mL Combo | 5.833 No   | ns  |
| 500µM Butyrate vs. 250pg/mL Combo | 21.17 No   | ns  |
| 10pg/mL Combo vs. 25pg/mL Combo   | 33 No      | ns  |
| 10pg/mL Combo vs. 50pg/mL Combo   | 42 No      | ns  |
| 10pg/mL Combo vs. 100pg/mL Combo  | 70.83 No   | ns  |
| 10pg/mL Combo vs. 250pg/mL Combo  | 116.8 Yes  | *** |
| 10pg/mL Combo vs. 10pg/mL Combo   | 76.17 No   | ns  |
| 10pg/mL Combo vs. 25pg/mL Combo   | 75.67 No   | ns  |
| 10pg/mL Combo vs. 50pg/mL Combo   | 88.67 Yes  | *   |
| 10pg/mL Combo vs. 100pg/mL Combo  | 100.2 Yes  | **  |
| 10pg/mL Combo vs. 250pg/mL Combo  | 115.5 Yes  | *** |
| 25pg/mL Combo vs. 50pg/mL Combo   | 9 No       | ns  |
| 25pg/mL Combo vs. 100pg/mL Combo  | 37.83 No   | ns  |
| 25pg/mL Combo vs. 250pg/mL Combo  | 83.83 No   | ns  |
| 25pg/mL Combo vs. 10pg/mL Combo   | 43.17 No   | ns  |
| 25pg/mL Combo vs. 25pg/mL Combo   | 42.67 No   | ns  |
| 25pg/mL Combo vs. 50pg/mL Combo   | 55.67 No   | ns  |
| 25pg/mL Combo vs. 100pg/mL Combo  | 67.17 No   | ns  |
| 25pg/mL Combo vs. 250pg/mL Combo  | 82.5 No    | ns  |
| 50pg/mL Combo vs. 100pg/mL Combo  | 28.83 No   | ns  |
| 50pg/mL Combo vs. 250pg/mL Combo  | 74.83 No   | ns  |
| 50pg/mL Combo vs. 10pg/mL Combo   | 34.17 No   | ns  |
| 50pg/mL Combo vs. 25pg/mL Combo   | 33.67 No   | ns  |
| 50pg/mL Combo vs. 50pg/mL Combo   | 46.67 No   | ns  |
| 50pg/mL Combo vs. 100pg/mL Combo  | 58.17 No   | ns  |
| 50pg/mL Combo vs. 250pg/mL Combo  | 73.5 No    | ns  |
| 100pg/mL Combo vs. 250pg/mL Combo | 46 No      | ns  |
| 100pg/mL Combo vs. 10pg/mL Combo  | 5.333 No   | ns  |

|                                   |           |    |
|-----------------------------------|-----------|----|
| 100pg/mL Combo vs. 25pg/mL Combo  | 4.833 No  | ns |
| 100pg/mL Combo vs. 50pg/mL Combo  | 17.83 No  | ns |
| 100pg/mL Combo vs. 100pg/mL Combo | 29.33 No  | ns |
| 100pg/mL Combo vs. 250pg/mL Combo | 44.67 No  | ns |
| 250pg/mL Combo vs. 10pg/mL Combo  | -40.67 No | ns |
| 250pg/mL Combo vs. 25pg/mL Combo  | -41.17 No | ns |
| 250pg/mL Combo vs. 50pg/mL Combo  | -28.17 No | ns |
| 250pg/mL Combo vs. 100pg/mL Combo | -16.67 No | ns |
| 250pg/mL Combo vs. 250pg/mL Combo | -1.333 No | ns |
| 10pg/mL Combo vs. 25pg/mL Combo   | -0.5 No   | ns |
| 10pg/mL Combo vs. 50pg/mL Combo   | 12.5 No   | ns |
| 10pg/mL Combo vs. 100pg/mL Combo  | 24 No     | ns |
| 10pg/mL Combo vs. 250pg/mL Combo  | 39.33 No  | ns |
| 25pg/mL Combo vs. 50pg/mL Combo   | 13 No     | ns |
| 25pg/mL Combo vs. 100pg/mL Combo  | 24.5 No   | ns |
| 25pg/mL Combo vs. 250pg/mL Combo  | 39.83 No  | ns |
| 50pg/mL Combo vs. 100pg/mL Combo  | 11.5 No   | ns |
| 50pg/mL Combo vs. 250pg/mL Combo  | 26.83 No  | ns |
| 100pg/mL Combo vs. 250pg/mL Combo | 15.33 No  |    |

A-B  
A-C  
A-D  
A-E  
A-F  
A-G  
A-L  
A-M  
A-N  
A-O  
A-P  
A-Q  
A-V  
A-W  
A-X  
A-Y  
A-Z  
A-AA  
A-AB  
A-AC  
A-AD  
A-AE  
B-C  
B-D  
B-E  
B-F  
B-G  
B-L  
B-M  
B-N  
B-O  
B-P  
B-Q  
B-V  
B-W  
B-X  
B-Y  
B-Z  
B-AA  
B-AB  
B-AC  
B-AD  
B-AE  
C-D  
C-E  
C-F

C-G  
C-L  
C-M  
C-N  
C-O  
C-P  
C-Q

C-V  
C-W  
C-X  
C-Y  
C-Z  
C-AA  
C-AB  
C-AC  
C-AD  
C-AE

D-E  
D-F  
D-G  
D-L  
D-M  
D-N  
D-O  
D-P  
D-Q

D-V  
D-W  
D-X  
D-Y  
D-Z  
D-AA  
D-AB  
D-AC  
D-AD  
D-AE

E-F  
E-G  
E-L  
E-M  
E-N  
E-O  
E-P  
E-Q

E-V  
E-W  
E-X

E-Y  
E-Z  
E-AA  
E-AB  
E-AC  
E-AD  
E-AE

F-G  
F-L  
F-M  
F-N  
F-O  
F-P  
F-Q

F-V  
F-W  
F-X  
F-Y  
F-Z  
F-AA  
F-AB  
F-AC  
F-AD  
F-AE

G-L  
G-M  
G-N  
G-O  
G-P  
G-Q

G-V  
G-W  
G-X  
G-Y  
G-Z  
G-AA  
G-AB  
G-AC  
G-AD  
G-AE

L-M  
L-N  
L-O  
L-P  
L-Q  
L-V  
L-W

L-X  
L-Y  
L-Z  
L-AA  
L-AB  
L-AC  
L-AD  
L-AE  
M-N  
M-O  
M-P  
M-Q  
M-V  
M-W  
M-X  
M-Y  
M-Z  
M-AA  
M-AB  
M-AC  
M-AD  
M-AE  
N-O  
N-P  
N-Q  
N-V  
N-W  
N-X  
N-Y  
N-Z  
N-AA  
N-AB  
N-AC  
N-AD  
N-AE  
O-P  
O-Q  
O-V  
O-W  
O-X  
O-Y  
O-Z  
O-AA  
O-AB  
O-AC  
O-AD  
O-AE

P-Q  
P-V  
P-W  
P-X  
P-Y  
P-Z  
P-AA  
P-AB  
P-AC  
P-AD  
P-AE  
Q-V  
Q-W  
Q-X  
Q-Y  
Q-Z  
Q-AA  
Q-AB  
Q-AC  
Q-AD  
Q-AE  
V-W  
V-X  
V-Y  
V-Z  
V-AA  
V-AB  
V-AC  
V-AD  
V-AE  
W-X  
W-Y  
W-Z  
W-AA  
W-AB  
W-AC  
W-AD  
W-AE  
X-Y  
X-Z  
X-AA  
X-AB  
X-AC  
X-AD  
X-AE  
Y-Z  
Y-AA

Y-AB  
Y-AC  
Y-AD  
Y-AE  
Z-AA  
Z-AB  
Z-AC  
Z-AD  
Z-AE  
AA-AB  
AA-AC  
AA-AD  
AA-AE  
AB-AC  
AB-AD  
AB-AE  
AC-AD  
AC-AE

| Treatment          | Dunn's multiple comparisons test | Mean rank | Significant | Summary | Adjusted P |
|--------------------|----------------------------------|-----------|-------------|---------|------------|
| Media vs. AA       | Media vs. 10 $\mu$ M AA          | 122.6     | No          | ns      | 0.0733     |
| Media vs TNFa      | Media vs. 50 pg/mL               | -17.6     | No          | ns      | >0.9999    |
| Media vs TNFa      | Media vs. 100 pg/mL              | -0.4603   | No          | ns      | >0.9999    |
| Media vs TNFa      | Media vs. 150 pg/mL              | 2.54      | No          | ns      | >0.9999    |
| Media vs TNFa      | Media vs. 200 pg/mL              | 6.54      | No          | ns      | >0.9999    |
| Media vs TNFa      | Media vs. 250 pg/mL              | 25.4      | No          | ns      | >0.9999    |
| Media vs TNFa      | Media vs. 500 pg/mL              | 61.4      | No          | ns      | >0.9999    |
| Media vs TNFa      | Media vs. 1 ng/mL                | 85.83     | No          | ns      | 0.7767     |
| Media vs TNFa      | Media vs. 2.5 ng/mL              | 110.7     | Yes         | *       | 0.0217     |
| Media vs TNFa      | Media vs. 5 ng/mL                | 139.1     | Yes         | ***     | 0.0001     |
| Media vs TNFa      | Media vs. 10 ng/mL               | 148.6     | Yes         | **      | 0.002      |
| Media Vs. Butyrate | Media vs. 50 $\mu$ M             | -1.603    | No          | ns      | >0.9999    |
| Media Vs. Butyrate | Media vs. 75 $\mu$ M             | -4.175    | No          | ns      | >0.9999    |
| Media Vs. Butyrate | Media vs. 100 $\mu$ M            | 1.254     | No          | ns      | >0.9999    |
| Media Vs. Butyrate | Media vs. 250 $\mu$ M            | 41.25     | No          | ns      | >0.9999    |
| Media Vs. Butyrate | Media vs. 500 $\mu$ M            | 57.4      | No          | ns      | >0.9999    |
| Media Vs. Butyrate | Media vs. 750 $\mu$ M            | 61.54     | No          | ns      | >0.9999    |
| Media Vs. Butyrate | Media vs. 1 mM                   | 54.4      | No          | ns      | >0.9999    |
| Media Vs. Butyrate | Media vs. 2.5 mM                 | 95.25     | No          | ns      | 0.2196     |
| Media Vs. Butyrate | Media vs. 5 mM                   | 103.8     | No          | ns      | 0.063      |
| Media Vs. Butyrate | Media vs. 7.5 mM                 | 106.3     | Yes         | *       | 0.0435     |
| Media Vs. Butyrate | Media vs. 10 mM                  | 115.6     | No          | ns      | 0.1728     |
| Media Vs. Butyrate | Media vs. 25 mM                  | 122.6     | No          | ns      | 0.0733     |
| Media Vs. Combo    | Media vs. 50 pg/mL               | 46.11     | No          | ns      | >0.9999    |
| Media Vs. Combo    | Media vs. 100 pg/mL              | 66.11     | No          | ns      | >0.9999    |
| Media Vs. Combo    | Media vs. 150 pg/mL              | 58.11     | No          | ns      | >0.9999    |
| Media Vs. Combo    | Media vs. 200 pg/mL              | 60.44     | No          | ns      | >0.9999    |
| Media Vs. Combo    | Media vs. 250 pg/mL              | 60.78     | No          | ns      | >0.9999    |
| Media Vs. Combo    | Media vs. 500 pg/mL              | 77.78     | No          | ns      | >0.9999    |
| Media Vs. Combo    | Media vs. 1 ng/mL                | 94.11     | No          | ns      | >0.9999    |
| Media Vs. Combo    | Media vs. 2.5 ng/mL              | 132.8     | No          | ns      | 0.1055     |
| Media Vs. Combo    | Media vs. 5 ng/mL                | 140.8     | Yes         | *       | 0.0424     |
| AA vs TNFa         | 10 $\mu$ M AA vs. 50 pg/mL       | -140.2    | Yes         | *       | 0.0156     |
| AA vs TNFa         | 10 $\mu$ M AA vs. 100 pg/mL      | -123.1    | No          | ns      | 0.1297     |
| AA vs TNFa         | 10 $\mu$ M AA vs. 150 pg/mL      | -120.1    | No          | ns      | 0.1832     |
| AA vs TNFa         | 10 $\mu$ M AA vs. 200 pg/mL      | -116.1    | No          | ns      | 0.2871     |
| AA vs TNFa         | 10 $\mu$ M AA vs. 250 pg/mL      | -97.21    | No          | ns      | >0.9999    |
| AA vs TNFa         | 10 $\mu$ M AA vs. 500 pg/mL      | -61.21    | No          | ns      | >0.9999    |
| AA vs TNFa         | 10 $\mu$ M AA vs. 1 ng/mL        | -36.79    | No          | ns      | >0.9999    |
| AA vs TNFa         | 10 $\mu$ M AA vs. 2.5 ng/mL      | -11.93    | No          | ns      | >0.9999    |
| AA vs TNFa         | 10 $\mu$ M AA vs. 5 ng/mL        | 16.5      | No          | ns      | >0.9999    |
| AA vs TNFa         | 10 $\mu$ M AA vs. 10 ng/mL       | 26        | No          | ns      | >0.9999    |
| AA Vs. Butyrate    | 10 $\mu$ M AA vs. 50 $\mu$ M     | -124.2    | No          | ns      | 0.1135     |
| AA Vs. Butyrate    | 10 $\mu$ M AA vs. 75 $\mu$ M     | -126.8    | No          | ns      | 0.0837     |
| AA Vs. Butyrate    | 10 $\mu$ M AA vs. 100 $\mu$ M    | -121.4    | No          | ns      | 0.1581     |
| AA Vs. Butyrate    | 10 $\mu$ M AA vs. 250 $\mu$ M    | -81.36    | No          | ns      | >0.9999    |

|                   |                               |           |      |         |
|-------------------|-------------------------------|-----------|------|---------|
| AA Vs. Butyrate   | 10 $\mu$ M AA vs. 500 $\mu$ M | -65.21 No | ns   | >0.9999 |
| AA Vs. Butyrate   | 10 $\mu$ M AA vs. 750 $\mu$ M | -61.07 No | ns   | >0.9999 |
| AA Vs. Butyrate   | 10 $\mu$ M AA vs. 1 mM        | -68.21 No | ns   | >0.9999 |
| AA Vs. Butyrate   | 10 $\mu$ M AA vs. 2.5 mM      | -27.36 No | ns   | >0.9999 |
| AA Vs. Butyrate   | 10 $\mu$ M AA vs. 5 mM        | -18.79 No | ns   | >0.9999 |
| AA Vs. Butyrate   | 10 $\mu$ M AA vs. 7.5 mM      | -16.36 No | ns   | >0.9999 |
| AA Vs. Butyrate   | 10 $\mu$ M AA vs. 10 mM       | -7 No     | ns   | >0.9999 |
| AA Vs. Butyrate   | 10 $\mu$ M AA vs. 25 mM       | 0 No      | ns   | >0.9999 |
| AA Vs. Combo      | 10 $\mu$ M AA vs. 50 pg/mL    | -76.5 No  | ns   | >0.9999 |
| AA Vs. Combo      | 10 $\mu$ M AA vs. 100 pg/mL   | -56.5 No  | ns   | >0.9999 |
| AA Vs. Combo      | 10 $\mu$ M AA vs. 150 pg/mL   | -64.5 No  | ns   | >0.9999 |
| AA Vs. Combo      | 10 $\mu$ M AA vs. 200 pg/mL   | -62.17 No | ns   | >0.9999 |
| AA Vs. Combo      | 10 $\mu$ M AA vs. 250 pg/mL   | -61.83 No | ns   | >0.9999 |
| AA Vs. Combo      | 10 $\mu$ M AA vs. 500 pg/mL   | -44.83 No | ns   | >0.9999 |
| AA Vs. Combo      | 10 $\mu$ M AA vs. 1 ng/mL     | -28.5 No  | ns   | >0.9999 |
| AA Vs. Combo      | 10 $\mu$ M AA vs. 2.5 ng/mL   | 10.17 No  | ns   | >0.9999 |
| AA Vs. Combo      | 10 $\mu$ M AA vs. 5 ng/mL     | 18.17 No  | ns   | >0.9999 |
| TNFa vs. TNFa     | 50 pg/mL vs. 100 pg/mL        | 17.14 No  | ns   | >0.9999 |
| TNFa vs. TNFa     | 50 pg/mL vs. 150 pg/mL        | 20.14 No  | ns   | >0.9999 |
| TNFa vs. TNFa     | 50 pg/mL vs. 200 pg/mL        | 24.14 No  | ns   | >0.9999 |
| TNFa vs. TNFa     | 50 pg/mL vs. 250 pg/mL        | 43 No     | ns   | >0.9999 |
| TNFa vs. TNFa     | 50 pg/mL vs. 500 pg/mL        | 79 No     | ns   | >0.9999 |
| TNFa vs. TNFa     | 50 pg/mL vs. 1 ng/mL          | 103.4 No  | ns   | 0.1595  |
| TNFa vs. TNFa     | 50 pg/mL vs. 2.5 ng/mL        | 128.3 Yes | **   | 0.0039  |
| TNFa vs. TNFa     | 50 pg/mL vs. 5 ng/mL          | 156.7 Yes | **** | <0.0001 |
| TNFa vs. TNFa     | 50 pg/mL vs. 10 ng/mL         | 166.2 Yes | ***  | 0.0004  |
| TNFa vs. Butyrate | 50 pg/mL vs. 50 $\mu$ M       | 16 No     | ns   | >0.9999 |
| TNFa vs. Butyrate | 50 pg/mL vs. 75 $\mu$ M       | 13.43 No  | ns   | >0.9999 |
| TNFa vs. Butyrate | 50 pg/mL vs. 100 $\mu$ M      | 18.86 No  | ns   | >0.9999 |
| TNFa vs. Butyrate | 50 pg/mL vs. 250 $\mu$ M      | 58.86 No  | ns   | >0.9999 |
| TNFa vs. Butyrate | 50 pg/mL vs. 500 $\mu$ M      | 75 No     | ns   | >0.9999 |
| TNFa vs. Butyrate | 50 pg/mL vs. 750 $\mu$ M      | 79.14 No  | ns   | >0.9999 |
| TNFa vs. Butyrate | 50 pg/mL vs. 1 mM             | 72 No     | ns   | >0.9999 |
| TNFa vs. Butyrate | 50 pg/mL vs. 2.5 mM           | 112.9 Yes | *    | 0.0425  |
| TNFa vs. Butyrate | 50 pg/mL vs. 5 mM             | 121.4 Yes | *    | 0.0117  |
| TNFa vs. Butyrate | 50 pg/mL vs. 7.5 mM           | 123.9 Yes | **   | 0.008   |
| TNFa vs. Butyrate | 50 pg/mL vs. 10 mM            | 133.2 Yes | *    | 0.0381  |
| TNFa vs. Butyrate | 50 pg/mL vs. 25 mM            | 140.2 Yes | *    | 0.0156  |
| TNFa vs. Combo    | 50 pg/mL vs. 50 pg/mL         | 63.71 No  | ns   | >0.9999 |
| TNFa vs. Combo    | 50 pg/mL vs. 100 pg/mL        | 83.71 No  | ns   | >0.9999 |
| TNFa vs. Combo    | 50 pg/mL vs. 150 pg/mL        | 75.71 No  | ns   | >0.9999 |
| TNFa vs. Combo    | 50 pg/mL vs. 200 pg/mL        | 78.05 No  | ns   | >0.9999 |
| TNFa vs. Combo    | 50 pg/mL vs. 250 pg/mL        | 78.38 No  | ns   | >0.9999 |
| TNFa vs. Combo    | 50 pg/mL vs. 500 pg/mL        | 95.38 No  | ns   | >0.9999 |
| TNFa vs. Combo    | 50 pg/mL vs. 1 ng/mL          | 111.7 No  | ns   | >0.9999 |
| TNFa vs. Combo    | 50 pg/mL vs. 2.5 ng/mL        | 150.4 Yes | *    | 0.0249  |
| TNFa vs. Combo    | 50 pg/mL vs. 5 ng/mL          | 158.4 Yes | **   | 0.0096  |

|                   |                         |           |     |         |
|-------------------|-------------------------|-----------|-----|---------|
| TNFa vs. TNFa     | 100 pg/mL vs. 150 pg/mL | 3 No      | ns  | >0.9999 |
| TNFa vs. TNFa     | 100 pg/mL vs. 200 pg/mL | 7 No      | ns  | >0.9999 |
| TNFa vs. TNFa     | 100 pg/mL vs. 250 pg/mL | 25.86 No  | ns  | >0.9999 |
| TNFa vs. TNFa     | 100 pg/mL vs. 500 pg/mL | 61.86 No  | ns  | >0.9999 |
| TNFa vs. TNFa     | 100 pg/mL vs. 1 ng/mL   | 86.29 No  | ns  | >0.9999 |
| TNFa vs. TNFa     | 100 pg/mL vs. 2.5 ng/mL | 111.1 No  | ns  | 0.0545  |
| TNFa vs. TNFa     | 100 pg/mL vs. 5 ng/mL   | 139.6 Yes | *** | 0.0006  |
| TNFa vs. TNFa     | 100 pg/mL vs. 10 ng/mL  | 149.1 Yes | **  | 0.0047  |
| TNFa vs. Butyrate | 100 pg/mL vs. 50 µM     | -1.143 No | ns  | >0.9999 |
| TNFa vs. Butyrate | 100 pg/mL vs. 75 µM     | -3.714 No | ns  | >0.9999 |
| TNFa vs. Butyrate | 100 pg/mL vs. 100 µM    | 1.714 No  | ns  | >0.9999 |
| TNFa vs. Butyrate | 100 pg/mL vs. 250 µM    | 41.71 No  | ns  | >0.9999 |
| TNFa vs. Butyrate | 100 pg/mL vs. 500 µM    | 57.86 No  | ns  | >0.9999 |
| TNFa vs. Butyrate | 100 pg/mL vs. 750 µM    | 62 No     | ns  | >0.9999 |
| TNFa vs. Butyrate | 100 pg/mL vs. 1 mM      | 54.86 No  | ns  | >0.9999 |
| TNFa vs. Butyrate | 100 pg/mL vs. 2.5 mM    | 95.71 No  | ns  | 0.4361  |
| TNFa vs. Butyrate | 100 pg/mL vs. 5 mM      | 104.3 No  | ns  | 0.1421  |
| TNFa vs. Butyrate | 100 pg/mL vs. 7.5 mM    | 106.7 No  | ns  | 0.1018  |
| TNFa vs. Butyrate | 100 pg/mL vs. 10 mM     | 116.1 No  | ns  | 0.2871  |
| TNFa vs. Butyrate | 100 pg/mL vs. 25 mM     | 123.1 No  | ns  | 0.1297  |
| TNFa vs. Combo    | 100 pg/mL vs. 50 pg/mL  | 46.57 No  | ns  | >0.9999 |
| TNFa vs. Combo    | 100 pg/mL vs. 100 pg/mL | 66.57 No  | ns  | >0.9999 |
| TNFa vs. Combo    | 100 pg/mL vs. 150 pg/mL | 58.57 No  | ns  | >0.9999 |
| TNFa vs. Combo    | 100 pg/mL vs. 200 pg/mL | 60.9 No   | ns  | >0.9999 |
| TNFa vs. Combo    | 100 pg/mL vs. 250 pg/mL | 61.24 No  | ns  | >0.9999 |
| TNFa vs. Combo    | 100 pg/mL vs. 500 pg/mL | 78.24 No  | ns  | >0.9999 |
| TNFa vs. Combo    | 100 pg/mL vs. 1 ng/mL   | 94.57 No  | ns  | >0.9999 |
| TNFa vs. Combo    | 100 pg/mL vs. 2.5 ng/mL | 133.2 No  | ns  | 0.1644  |
| TNFa vs. Combo    | 100 pg/mL vs. 5 ng/mL   | 141.2 No  | ns  | 0.0698  |
| TNFa vs. TNFa     | 150 pg/mL vs. 200 pg/mL | 4 No      | ns  | >0.9999 |
| TNFa vs. TNFa     | 150 pg/mL vs. 250 pg/mL | 22.86 No  | ns  | >0.9999 |
| TNFa vs. TNFa     | 150 pg/mL vs. 500 pg/mL | 58.86 No  | ns  | >0.9999 |
| TNFa vs. TNFa     | 150 pg/mL vs. 1 ng/mL   | 83.29 No  | ns  | >0.9999 |
| TNFa vs. TNFa     | 150 pg/mL vs. 2.5 ng/mL | 108.1 No  | ns  | 0.0834  |
| TNFa vs. TNFa     | 150 pg/mL vs. 5 ng/mL   | 136.6 Yes | *** | 0.001   |
| TNFa vs. TNFa     | 150 pg/mL vs. 10 ng/mL  | 146.1 Yes | **  | 0.0071  |
| TNFa vs. Butyrate | 150 pg/mL vs. 50 µM     | -4.143 No | ns  | >0.9999 |
| TNFa vs. Butyrate | 150 pg/mL vs. 75 µM     | -6.714 No | ns  | >0.9999 |
| TNFa vs. Butyrate | 150 pg/mL vs. 100 µM    | -1.286 No | ns  | >0.9999 |
| TNFa vs. Butyrate | 150 pg/mL vs. 250 µM    | 38.71 No  | ns  | >0.9999 |
| TNFa vs. Butyrate | 150 pg/mL vs. 500 µM    | 54.86 No  | ns  | >0.9999 |
| TNFa vs. Butyrate | 150 pg/mL vs. 750 µM    | 59 No     | ns  | >0.9999 |
| TNFa vs. Butyrate | 150 pg/mL vs. 1 mM      | 51.86 No  | ns  | >0.9999 |
| TNFa vs. Butyrate | 150 pg/mL vs. 2.5 mM    | 92.71 No  | ns  | 0.633   |
| TNFa vs. Butyrate | 150 pg/mL vs. 5 mM      | 101.3 No  | ns  | 0.2124  |
| TNFa vs. Butyrate | 150 pg/mL vs. 7.5 mM    | 103.7 No  | ns  | 0.1535  |
| TNFa vs. Butyrate | 150 pg/mL vs. 10 mM     | 113.1 No  | ns  | 0.3985  |

|                   |                         |           |    |         |
|-------------------|-------------------------|-----------|----|---------|
| TNFa vs. Butyrate | 150 pg/mL vs. 25 mM     | 120.1 No  | ns | 0.1832  |
| TNFa vs. Combo    | 150 pg/mL vs. 50 pg/mL  | 43.57 No  | ns | >0.9999 |
| TNFa vs. Combo    | 150 pg/mL vs. 100 pg/mL | 63.57 No  | ns | >0.9999 |
| TNFa vs. Combo    | 150 pg/mL vs. 150 pg/mL | 55.57 No  | ns | >0.9999 |
| TNFa vs. Combo    | 150 pg/mL vs. 200 pg/mL | 57.9 No   | ns | >0.9999 |
| TNFa vs. Combo    | 150 pg/mL vs. 250 pg/mL | 58.24 No  | ns | >0.9999 |
| TNFa vs. Combo    | 150 pg/mL vs. 500 pg/mL | 75.24 No  | ns | >0.9999 |
| TNFa vs. Combo    | 150 pg/mL vs. 1 ng/mL   | 91.57 No  | ns | >0.9999 |
| TNFa vs. Combo    | 150 pg/mL vs. 2.5 ng/mL | 130.2 No  | ns | 0.224   |
| TNFa vs. Combo    | 150 pg/mL vs. 5 ng/mL   | 138.2 No  | ns | 0.0968  |
| TNFa vs. TNFa     | 200 pg/mL vs. 250 pg/mL | 18.86 No  | ns | >0.9999 |
| TNFa vs. TNFa     | 200 pg/mL vs. 500 pg/mL | 54.86 No  | ns | >0.9999 |
| TNFa vs. TNFa     | 200 pg/mL vs. 1 ng/mL   | 79.29 No  | ns | >0.9999 |
| TNFa vs. TNFa     | 200 pg/mL vs. 2.5 ng/mL | 104.1 No  | ns | 0.1448  |
| TNFa vs. TNFa     | 200 pg/mL vs. 5 ng/mL   | 132.6 Yes | ** | 0.0019  |
| TNFa vs. TNFa     | 200 pg/mL vs. 10 ng/mL  | 142.1 Yes | *  | 0.0122  |
| TNFa vs. Butyrate | 200 pg/mL vs. 50 µM     | -8.143 No | ns | >0.9999 |
| TNFa vs. Butyrate | 200 pg/mL vs. 75 µM     | -10.71 No | ns | >0.9999 |
| TNFa vs. Butyrate | 200 pg/mL vs. 100 µM    | -5.286 No | ns | >0.9999 |
| TNFa vs. Butyrate | 200 pg/mL vs. 250 µM    | 34.71 No  | ns | >0.9999 |
| TNFa vs. Butyrate | 200 pg/mL vs. 500 µM    | 50.86 No  | ns | >0.9999 |
| TNFa vs. Butyrate | 200 pg/mL vs. 750 µM    | 55 No     | ns | >0.9999 |
| TNFa vs. Butyrate | 200 pg/mL vs. 1 mM      | 47.86 No  | ns | >0.9999 |
| TNFa vs. Butyrate | 200 pg/mL vs. 2.5 mM    | 88.71 No  | ns | >0.9999 |
| TNFa vs. Butyrate | 200 pg/mL vs. 5 mM      | 97.29 No  | ns | 0.3573  |
| TNFa vs. Butyrate | 200 pg/mL vs. 7.5 mM    | 99.71 No  | ns | 0.2611  |
| TNFa vs. Butyrate | 200 pg/mL vs. 10 mM     | 109.1 No  | ns | 0.61    |
| TNFa vs. Butyrate | 200 pg/mL vs. 25 mM     | 116.1 No  | ns | 0.2871  |
| TNFa vs. Combo    | 200 pg/mL vs. 50 pg/mL  | 39.57 No  | ns | >0.9999 |
| TNFa vs. Combo    | 200 pg/mL vs. 100 pg/mL | 59.57 No  | ns | >0.9999 |
| TNFa vs. Combo    | 200 pg/mL vs. 150 pg/mL | 51.57 No  | ns | >0.9999 |
| TNFa vs. Combo    | 200 pg/mL vs. 200 pg/mL | 53.9 No   | ns | >0.9999 |
| TNFa vs. Combo    | 200 pg/mL vs. 250 pg/mL | 54.24 No  | ns | >0.9999 |
| TNFa vs. Combo    | 200 pg/mL vs. 500 pg/mL | 71.24 No  | ns | >0.9999 |
| TNFa vs. Combo    | 200 pg/mL vs. 1 ng/mL   | 87.57 No  | ns | >0.9999 |
| TNFa vs. Combo    | 200 pg/mL vs. 2.5 ng/mL | 126.2 No  | ns | 0.3352  |
| TNFa vs. Combo    | 200 pg/mL vs. 5 ng/mL   | 134.2 No  | ns | 0.1481  |
| TNFa vs. TNFa     | 250 pg/mL vs. 500 pg/mL | 36 No     | ns | >0.9999 |
| TNFa vs. TNFa     | 250 pg/mL vs. 1 ng/mL   | 60.43 No  | ns | >0.9999 |
| TNFa vs. TNFa     | 250 pg/mL vs. 2.5 ng/mL | 85.29 No  | ns | >0.9999 |
| TNFa vs. TNFa     | 250 pg/mL vs. 5 ng/mL   | 113.7 Yes | *  | 0.0375  |
| TNFa vs. TNFa     | 250 pg/mL vs. 10 ng/mL  | 123.2 No  | ns | 0.1275  |
| TNFa vs. Butyrate | 250 pg/mL vs. 50 µM     | -27 No    | ns | >0.9999 |
| TNFa vs. Butyrate | 250 pg/mL vs. 75 µM     | -29.57 No | ns | >0.9999 |
| TNFa vs. Butyrate | 250 pg/mL vs. 100 µM    | -24.14 No | ns | >0.9999 |
| TNFa vs. Butyrate | 250 pg/mL vs. 250 µM    | 15.86 No  | ns | >0.9999 |
| TNFa vs. Butyrate | 250 pg/mL vs. 500 µM    | 32 No     | ns | >0.9999 |

|                   |                         |         |    |    |         |
|-------------------|-------------------------|---------|----|----|---------|
| TNFa vs. Butyrate | 250 pg/mL vs. 750 µM    | 36.14   | No | ns | >0.9999 |
| TNFa vs. Butyrate | 250 pg/mL vs. 1 mM      | 29      | No | ns | >0.9999 |
| TNFa vs. Butyrate | 250 pg/mL vs. 2.5 mM    | 69.86   | No | ns | >0.9999 |
| TNFa vs. Butyrate | 250 pg/mL vs. 5 mM      | 78.43   | No | ns | >0.9999 |
| TNFa vs. Butyrate | 250 pg/mL vs. 7.5 mM    | 80.86   | No | ns | >0.9999 |
| TNFa vs. Butyrate | 250 pg/mL vs. 10 mM     | 90.21   | No | ns | >0.9999 |
| TNFa vs. Butyrate | 250 pg/mL vs. 25 mM     | 97.21   | No | ns | >0.9999 |
| TNFa vs. Combo    | 250 pg/mL vs. 50 pg/mL  | 20.71   | No | ns | >0.9999 |
| TNFa vs. Combo    | 250 pg/mL vs. 100 pg/mL | 40.71   | No | ns | >0.9999 |
| TNFa vs. Combo    | 250 pg/mL vs. 150 pg/mL | 32.71   | No | ns | >0.9999 |
| TNFa vs. Combo    | 250 pg/mL vs. 200 pg/mL | 35.05   | No | ns | >0.9999 |
| TNFa vs. Combo    | 250 pg/mL vs. 250 pg/mL | 35.38   | No | ns | >0.9999 |
| TNFa vs. Combo    | 250 pg/mL vs. 500 pg/mL | 52.38   | No | ns | >0.9999 |
| TNFa vs. Combo    | 250 pg/mL vs. 1 ng/mL   | 68.71   | No | ns | >0.9999 |
| TNFa vs. Combo    | 250 pg/mL vs. 2.5 ng/mL | 107.4   | No | ns | >0.9999 |
| TNFa vs. Combo    | 250 pg/mL vs. 5 ng/mL   | 115.4   | No | ns | 0.9471  |
| TNFa vs. TNFa     | 500 pg/mL vs. 1 ng/mL   | 24.43   | No | ns | >0.9999 |
| TNFa vs. TNFa     | 500 pg/mL vs. 2.5 ng/mL | 49.29   | No | ns | >0.9999 |
| TNFa vs. TNFa     | 500 pg/mL vs. 5 ng/mL   | 77.71   | No | ns | >0.9999 |
| TNFa vs. TNFa     | 500 pg/mL vs. 10 ng/mL  | 87.21   | No | ns | >0.9999 |
| TNFa vs. Butyrate | 500 pg/mL vs. 50 µM     | -63     | No | ns | >0.9999 |
| TNFa vs. Butyrate | 500 pg/mL vs. 75 µM     | -65.57  | No | ns | >0.9999 |
| TNFa vs. Butyrate | 500 pg/mL vs. 100 µM    | -60.14  | No | ns | >0.9999 |
| TNFa vs. Butyrate | 500 pg/mL vs. 250 µM    | -20.14  | No | ns | >0.9999 |
| TNFa vs. Butyrate | 500 pg/mL vs. 500 µM    | -4      | No | ns | >0.9999 |
| TNFa vs. Butyrate | 500 pg/mL vs. 750 µM    | 0.1429  | No | ns | >0.9999 |
| TNFa vs. Butyrate | 500 pg/mL vs. 1 mM      | -7      | No | ns | >0.9999 |
| TNFa vs. Butyrate | 500 pg/mL vs. 2.5 mM    | 33.86   | No | ns | >0.9999 |
| TNFa vs. Butyrate | 500 pg/mL vs. 5 mM      | 42.43   | No | ns | >0.9999 |
| TNFa vs. Butyrate | 500 pg/mL vs. 7.5 mM    | 44.86   | No | ns | >0.9999 |
| TNFa vs. Butyrate | 500 pg/mL vs. 10 mM     | 54.21   | No | ns | >0.9999 |
| TNFa vs. Butyrate | 500 pg/mL vs. 25 mM     | 61.21   | No | ns | >0.9999 |
| TNFa vs. Combo    | 500 pg/mL vs. 50 pg/mL  | -15.29  | No | ns | >0.9999 |
| TNFa vs. Combo    | 500 pg/mL vs. 100 pg/mL | 4.714   | No | ns | >0.9999 |
| TNFa vs. Combo    | 500 pg/mL vs. 150 pg/mL | -3.286  | No | ns | >0.9999 |
| TNFa vs. Combo    | 500 pg/mL vs. 200 pg/mL | -0.9524 | No | ns | >0.9999 |
| TNFa vs. Combo    | 500 pg/mL vs. 250 pg/mL | -0.619  | No | ns | >0.9999 |
| TNFa vs. Combo    | 500 pg/mL vs. 500 pg/mL | 16.38   | No | ns | >0.9999 |
| TNFa vs. Combo    | 500 pg/mL vs. 1 ng/mL   | 32.71   | No | ns | >0.9999 |
| TNFa vs. Combo    | 500 pg/mL vs. 2.5 ng/mL | 71.38   | No | ns | >0.9999 |
| TNFa vs. Combo    | 500 pg/mL vs. 5 ng/mL   | 79.38   | No | ns | >0.9999 |
| TNFa vs. TNFa     | 1 ng/mL vs. 2.5 ng/mL   | 24.86   | No | ns | >0.9999 |
| TNFa vs. TNFa     | 1 ng/mL vs. 5 ng/mL     | 53.29   | No | ns | >0.9999 |
| TNFa vs. TNFa     | 1 ng/mL vs. 10 ng/mL    | 62.79   | No | ns | >0.9999 |
| TNFa vs. Butyrate | 1 ng/mL vs. 50 µM       | -87.43  | No | ns | >0.9999 |
| TNFa vs. Butyrate | 1 ng/mL vs. 75 µM       | -90     | No | ns | 0.879   |
| TNFa vs. Butyrate | 1 ng/mL vs. 100 µM      | -84.57  | No | ns | >0.9999 |

|                   |                         |            |     |         |
|-------------------|-------------------------|------------|-----|---------|
| TNFa vs. Butyrate | 1 ng/mL vs. 250 µM      | -44.57 No  | ns  | >0.9999 |
| TNFa vs. Butyrate | 1 ng/mL vs. 500 µM      | -28.43 No  | ns  | >0.9999 |
| TNFa vs. Butyrate | 1 ng/mL vs. 750 µM      | -24.29 No  | ns  | >0.9999 |
| TNFa vs. Butyrate | 1 ng/mL vs. 1 mM        | -31.43 No  | ns  | >0.9999 |
| TNFa vs. Butyrate | 1 ng/mL vs. 2.5 mM      | 9.429 No   | ns  | >0.9999 |
| TNFa vs. Butyrate | 1 ng/mL vs. 5 mM        | 18 No      | ns  | >0.9999 |
| TNFa vs. Butyrate | 1 ng/mL vs. 7.5 mM      | 20.43 No   | ns  | >0.9999 |
| TNFa vs. Butyrate | 1 ng/mL vs. 10 mM       | 29.79 No   | ns  | >0.9999 |
| TNFa vs. Butyrate | 1 ng/mL vs. 25 mM       | 36.79 No   | ns  | >0.9999 |
| TNFa vs. Combo    | 1 ng/mL vs. 50 pg/mL    | -39.71 No  | ns  | >0.9999 |
| TNFa vs. Combo    | 1 ng/mL vs. 100 pg/mL   | -19.71 No  | ns  | >0.9999 |
| TNFa vs. Combo    | 1 ng/mL vs. 150 pg/mL   | -27.71 No  | ns  | >0.9999 |
| TNFa vs. Combo    | 1 ng/mL vs. 200 pg/mL   | -25.38 No  | ns  | >0.9999 |
| TNFa vs. Combo    | 1 ng/mL vs. 250 pg/mL   | -25.05 No  | ns  | >0.9999 |
| TNFa vs. Combo    | 1 ng/mL vs. 500 pg/mL   | -8.048 No  | ns  | >0.9999 |
| TNFa vs. Combo    | 1 ng/mL vs. 1 ng/mL     | 8.286 No   | ns  | >0.9999 |
| TNFa vs. Combo    | 1 ng/mL vs. 2.5 ng/mL   | 46.95 No   | ns  | >0.9999 |
| TNFa vs. Combo    | 1 ng/mL vs. 5 ng/mL     | 54.95 No   | ns  | >0.9999 |
| TNFa vs. TNFa     | 2.5 ng/mL vs. 5 ng/mL   | 28.43 No   | ns  | >0.9999 |
| TNFa vs. TNFa     | 2.5 ng/mL vs. 10 ng/mL  | 37.93 No   | ns  | >0.9999 |
| TNFa vs. Butyrate | 2.5 ng/mL vs. 50 µM     | -112.3 Yes | *   | 0.0462  |
| TNFa vs. Butyrate | 2.5 ng/mL vs. 75 µM     | -114.9 Yes | *   | 0.0317  |
| TNFa vs. Butyrate | 2.5 ng/mL vs. 100 µM    | -109.4 No  | ns  | 0.0696  |
| TNFa vs. Butyrate | 2.5 ng/mL vs. 250 µM    | -69.43 No  | ns  | >0.9999 |
| TNFa vs. Butyrate | 2.5 ng/mL vs. 500 µM    | -53.29 No  | ns  | >0.9999 |
| TNFa vs. Butyrate | 2.5 ng/mL vs. 750 µM    | -49.14 No  | ns  | >0.9999 |
| TNFa vs. Butyrate | 2.5 ng/mL vs. 1 mM      | -56.29 No  | ns  | >0.9999 |
| TNFa vs. Butyrate | 2.5 ng/mL vs. 2.5 mM    | -15.43 No  | ns  | >0.9999 |
| TNFa vs. Butyrate | 2.5 ng/mL vs. 5 mM      | -6.857 No  | ns  | >0.9999 |
| TNFa vs. Butyrate | 2.5 ng/mL vs. 7.5 mM    | -4.429 No  | ns  | >0.9999 |
| TNFa vs. Butyrate | 2.5 ng/mL vs. 10 mM     | 4.929 No   | ns  | >0.9999 |
| TNFa vs. Butyrate | 2.5 ng/mL vs. 25 mM     | 11.93 No   | ns  | >0.9999 |
| TNFa vs. Combo    | 2.5 ng/mL vs. 50 pg/mL  | -64.57 No  | ns  | >0.9999 |
| TNFa vs. Combo    | 2.5 ng/mL vs. 100 pg/mL | -44.57 No  | ns  | >0.9999 |
| TNFa vs. Combo    | 2.5 ng/mL vs. 150 pg/mL | -52.57 No  | ns  | >0.9999 |
| TNFa vs. Combo    | 2.5 ng/mL vs. 200 pg/mL | -50.24 No  | ns  | >0.9999 |
| TNFa vs. Combo    | 2.5 ng/mL vs. 250 pg/mL | -49.9 No   | ns  | >0.9999 |
| TNFa vs. Combo    | 2.5 ng/mL vs. 500 pg/mL | -32.9 No   | ns  | >0.9999 |
| TNFa vs. Combo    | 2.5 ng/mL vs. 1 ng/mL   | -16.57 No  | ns  | >0.9999 |
| TNFa vs. Combo    | 2.5 ng/mL vs. 2.5 ng/mL | 22.1 No    | ns  | >0.9999 |
| TNFa vs. Combo    | 2.5 ng/mL vs. 5 ng/mL   | 30.1 No    | ns  | >0.9999 |
| TNFa vs. TNFa     | 5 ng/mL vs. 10 ng/mL    | 9.5 No     | ns  | >0.9999 |
| TNFa vs. Butyrate | 5 ng/mL vs. 50 µM       | -140.7 Yes | *** | 0.0005  |
| TNFa vs. Butyrate | 5 ng/mL vs. 75 µM       | -143.3 Yes | *** | 0.0003  |
| TNFa vs. Butyrate | 5 ng/mL vs. 100 µM      | -137.9 Yes | *** | 0.0008  |
| TNFa vs. Butyrate | 5 ng/mL vs. 250 µM      | -97.86 No  | ns  | 0.3321  |
| TNFa vs. Butyrate | 5 ng/mL vs. 500 µM      | -81.71 No  | ns  | >0.9999 |

|                       |                        |            |    |         |
|-----------------------|------------------------|------------|----|---------|
| TNFa vs. Butyrate     | 5 ng/mL vs. 750 µM     | -77.57 No  | ns | >0.9999 |
| TNFa vs. Butyrate     | 5 ng/mL vs. 1 mM       | -84.71 No  | ns | >0.9999 |
| TNFa vs. Butyrate     | 5 ng/mL vs. 2.5 mM     | -43.86 No  | ns | >0.9999 |
| TNFa vs. Butyrate     | 5 ng/mL vs. 5 mM       | -35.29 No  | ns | >0.9999 |
| TNFa vs. Butyrate     | 5 ng/mL vs. 7.5 mM     | -32.86 No  | ns | >0.9999 |
| TNFa vs. Butyrate     | 5 ng/mL vs. 10 mM      | -23.5 No   | ns | >0.9999 |
| TNFa vs. Butyrate     | 5 ng/mL vs. 25 mM      | -16.5 No   | ns | >0.9999 |
| TNFa vs. Combo        | 5 ng/mL vs. 50 pg/mL   | -93 No     | ns | >0.9999 |
| TNFa vs. Combo        | 5 ng/mL vs. 100 pg/mL  | -73 No     | ns | >0.9999 |
| TNFa vs. Combo        | 5 ng/mL vs. 150 pg/mL  | -81 No     | ns | >0.9999 |
| TNFa vs. Combo        | 5 ng/mL vs. 200 pg/mL  | -78.67 No  | ns | >0.9999 |
| TNFa vs. Combo        | 5 ng/mL vs. 250 pg/mL  | -78.33 No  | ns | >0.9999 |
| TNFa vs. Combo        | 5 ng/mL vs. 500 pg/mL  | -61.33 No  | ns | >0.9999 |
| TNFa vs. Combo        | 5 ng/mL vs. 1 ng/mL    | -45 No     | ns | >0.9999 |
| TNFa vs. Combo        | 5 ng/mL vs. 2.5 ng/mL  | -6.333 No  | ns | >0.9999 |
| TNFa vs. Combo        | 5 ng/mL vs. 5 ng/mL    | 1.667 No   | ns | >0.9999 |
| TNFa vs. Butyrate     | 10 ng/mL vs. 50 µM     | -150.2 Yes | ** | 0.004   |
| TNFa vs. Butyrate     | 10 ng/mL vs. 75 µM     | -152.8 Yes | ** | 0.0028  |
| TNFa vs. Butyrate     | 10 ng/mL vs. 100 µM    | -147.4 Yes | ** | 0.006   |
| TNFa vs. Butyrate     | 10 ng/mL vs. 250 µM    | -107.4 No  | ns | 0.7291  |
| TNFa vs. Butyrate     | 10 ng/mL vs. 500 µM    | -91.21 No  | ns | >0.9999 |
| TNFa vs. Butyrate     | 10 ng/mL vs. 750 µM    | -87.07 No  | ns | >0.9999 |
| TNFa vs. Butyrate     | 10 ng/mL vs. 1 mM      | -94.21 No  | ns | >0.9999 |
| TNFa vs. Butyrate     | 10 ng/mL vs. 2.5 mM    | -53.36 No  | ns | >0.9999 |
| TNFa vs. Butyrate     | 10 ng/mL vs. 5 mM      | -44.79 No  | ns | >0.9999 |
| TNFa vs. Butyrate     | 10 ng/mL vs. 7.5 mM    | -42.36 No  | ns | >0.9999 |
| TNFa vs. Butyrate     | 10 ng/mL vs. 10 mM     | -33 No     | ns | >0.9999 |
| TNFa vs. Butyrate     | 10 ng/mL vs. 25 mM     | -26 No     | ns | >0.9999 |
| TNFa vs. Combo        | 10 ng/mL vs. 50 pg/mL  | -102.5 No  | ns | >0.9999 |
| TNFa vs. Combo        | 10 ng/mL vs. 100 pg/mL | -82.5 No   | ns | >0.9999 |
| TNFa vs. Combo        | 10 ng/mL vs. 150 pg/mL | -90.5 No   | ns | >0.9999 |
| TNFa vs. Combo        | 10 ng/mL vs. 200 pg/mL | -88.17 No  | ns | >0.9999 |
| TNFa vs. Combo        | 10 ng/mL vs. 250 pg/mL | -87.83 No  | ns | >0.9999 |
| TNFa vs. Combo        | 10 ng/mL vs. 500 pg/mL | -70.83 No  | ns | >0.9999 |
| TNFa vs. Combo        | 10 ng/mL vs. 1 ng/mL   | -54.5 No   | ns | >0.9999 |
| TNFa vs. Combo        | 10 ng/mL vs. 2.5 ng/mL | -15.83 No  | ns | >0.9999 |
| TNFa vs. Combo        | 10 ng/mL vs. 5 ng/mL   | -7.833 No  | ns | >0.9999 |
| Butyrate vs. Butyrate | 50 µM vs. 75 µM        | -2.571 No  | ns | >0.9999 |
| Butyrate vs. Butyrate | 50 µM vs. 100 µM       | 2.857 No   | ns | >0.9999 |
| Butyrate vs. Butyrate | 50 µM vs. 250 µM       | 42.86 No   | ns | >0.9999 |
| Butyrate vs. Butyrate | 50 µM vs. 500 µM       | 59 No      | ns | >0.9999 |
| Butyrate vs. Butyrate | 50 µM vs. 750 µM       | 63.14 No   | ns | >0.9999 |
| Butyrate vs. Butyrate | 50 µM vs. 1 mM         | 56 No      | ns | >0.9999 |
| Butyrate vs. Butyrate | 50 µM vs. 2.5 mM       | 96.86 No   | ns | 0.3774  |
| Butyrate vs. Butyrate | 50 µM vs. 5 mM         | 105.4 No   | ns | 0.1215  |
| Butyrate vs. Butyrate | 50 µM vs. 7.5 mM       | 107.9 No   | ns | 0.0868  |
| Butyrate vs. Butyrate | 50 µM vs. 10 mM        | 117.2 No   | ns | 0.2528  |

|                       |                             |          |    |         |
|-----------------------|-----------------------------|----------|----|---------|
| Butyrate vs. Butyrate | 50 $\mu$ M vs. 25 mM        | 124.2 No | ns | 0.1135  |
| Butyrate vs. Combo    | 50 $\mu$ M vs. 50 pg/mL     | 47.71 No | ns | >0.9999 |
| Butyrate vs. Combo    | 50 $\mu$ M vs. 100 pg/mL    | 67.71 No | ns | >0.9999 |
| Butyrate vs. Combo    | 50 $\mu$ M vs. 150 pg/mL    | 59.71 No | ns | >0.9999 |
| Butyrate vs. Combo    | 50 $\mu$ M vs. 200 pg/mL    | 62.05 No | ns | >0.9999 |
| Butyrate vs. Combo    | 50 $\mu$ M vs. 250 pg/mL    | 62.38 No | ns | >0.9999 |
| Butyrate vs. Combo    | 50 $\mu$ M vs. 500 pg/mL    | 79.38 No | ns | >0.9999 |
| Butyrate vs. Combo    | 50 $\mu$ M vs. 1 ng/mL      | 95.71 No | ns | >0.9999 |
| Butyrate vs. Combo    | 50 $\mu$ M vs. 2.5 ng/mL    | 134.4 No | ns | 0.1459  |
| Butyrate vs. Combo    | 50 $\mu$ M vs. 5 ng/mL      | 142.4 No | ns | 0.0616  |
| Butyrate vs. Butyrate | 75 $\mu$ M vs. 100 $\mu$ M  | 5.429 No | ns | >0.9999 |
| Butyrate vs. Butyrate | 75 $\mu$ M vs. 250 $\mu$ M  | 45.43 No | ns | >0.9999 |
| Butyrate vs. Butyrate | 75 $\mu$ M vs. 500 $\mu$ M  | 61.57 No | ns | >0.9999 |
| Butyrate vs. Butyrate | 75 $\mu$ M vs. 750 $\mu$ M  | 65.71 No | ns | >0.9999 |
| Butyrate vs. Butyrate | 75 $\mu$ M vs. 1 mM         | 58.57 No | ns | >0.9999 |
| Butyrate vs. Butyrate | 75 $\mu$ M vs. 2.5 mM       | 99.43 No | ns | 0.271   |
| Butyrate vs. Butyrate | 75 $\mu$ M vs. 5 mM         | 108 No   | ns | 0.0851  |
| Butyrate vs. Butyrate | 75 $\mu$ M vs. 7.5 mM       | 110.4 No | ns | 0.0604  |
| Butyrate vs. Butyrate | 75 $\mu$ M vs. 10 mM        | 119.8 No | ns | 0.1893  |
| Butyrate vs. Butyrate | 75 $\mu$ M vs. 25 mM        | 126.8 No | ns | 0.0837  |
| Butyrate vs. Combo    | 75 $\mu$ M vs. 50 pg/mL     | 50.29 No | ns | >0.9999 |
| Butyrate vs. Combo    | 75 $\mu$ M vs. 100 pg/mL    | 70.29 No | ns | >0.9999 |
| Butyrate vs. Combo    | 75 $\mu$ M vs. 150 pg/mL    | 62.29 No | ns | >0.9999 |
| Butyrate vs. Combo    | 75 $\mu$ M vs. 200 pg/mL    | 64.62 No | ns | >0.9999 |
| Butyrate vs. Combo    | 75 $\mu$ M vs. 250 pg/mL    | 64.95 No | ns | >0.9999 |
| Butyrate vs. Combo    | 75 $\mu$ M vs. 500 pg/mL    | 81.95 No | ns | >0.9999 |
| Butyrate vs. Combo    | 75 $\mu$ M vs. 1 ng/mL      | 98.29 No | ns | >0.9999 |
| Butyrate vs. Combo    | 75 $\mu$ M vs. 2.5 ng/mL    | 137 No   | ns | 0.1111  |
| Butyrate vs. Combo    | 75 $\mu$ M vs. 5 ng/mL      | 145 Yes  | *  | 0.0462  |
| Butyrate vs. Butyrate | 100 $\mu$ M vs. 250 $\mu$ M | 40 No    | ns | >0.9999 |
| Butyrate vs. Butyrate | 100 $\mu$ M vs. 500 $\mu$ M | 56.14 No | ns | >0.9999 |
| Butyrate vs. Butyrate | 100 $\mu$ M vs. 750 $\mu$ M | 60.29 No | ns | >0.9999 |
| Butyrate vs. Butyrate | 100 $\mu$ M vs. 1 mM        | 53.14 No | ns | >0.9999 |
| Butyrate vs. Butyrate | 100 $\mu$ M vs. 2.5 mM      | 94 No    | ns | 0.5403  |
| Butyrate vs. Butyrate | 100 $\mu$ M vs. 5 mM        | 102.6 No | ns | 0.179   |
| Butyrate vs. Butyrate | 100 $\mu$ M vs. 7.5 mM      | 105 No   | ns | 0.1289  |
| Butyrate vs. Butyrate | 100 $\mu$ M vs. 10 mM       | 114.4 No | ns | 0.3466  |
| Butyrate vs. Butyrate | 100 $\mu$ M vs. 25 mM       | 121.4 No | ns | 0.1581  |
| Butyrate vs. Combo    | 100 $\mu$ M vs. 50 pg/mL    | 44.86 No | ns | >0.9999 |
| Butyrate vs. Combo    | 100 $\mu$ M vs. 100 pg/mL   | 64.86 No | ns | >0.9999 |
| Butyrate vs. Combo    | 100 $\mu$ M vs. 150 pg/mL   | 56.86 No | ns | >0.9999 |
| Butyrate vs. Combo    | 100 $\mu$ M vs. 200 pg/mL   | 59.19 No | ns | >0.9999 |
| Butyrate vs. Combo    | 100 $\mu$ M vs. 250 pg/mL   | 59.52 No | ns | >0.9999 |
| Butyrate vs. Combo    | 100 $\mu$ M vs. 500 pg/mL   | 76.52 No | ns | >0.9999 |
| Butyrate vs. Combo    | 100 $\mu$ M vs. 1 ng/mL     | 92.86 No | ns | >0.9999 |
| Butyrate vs. Combo    | 100 $\mu$ M vs. 2.5 ng/mL   | 131.5 No | ns | 0.1963  |
| Butyrate vs. Combo    | 100 $\mu$ M vs. 5 ng/mL     | 139.5 No | ns | 0.0842  |

|                       |                             |         |    |    |         |
|-----------------------|-----------------------------|---------|----|----|---------|
| Butyrate vs. Butyrate | 250 $\mu$ M vs. 500 $\mu$ M | 16.14   | No | ns | >0.9999 |
| Butyrate vs. Butyrate | 250 $\mu$ M vs. 750 $\mu$ M | 20.29   | No | ns | >0.9999 |
| Butyrate vs. Butyrate | 250 $\mu$ M vs. 1 mM        | 13.14   | No | ns | >0.9999 |
| Butyrate vs. Butyrate | 250 $\mu$ M vs. 2.5 mM      | 54      | No | ns | >0.9999 |
| Butyrate vs. Butyrate | 250 $\mu$ M vs. 5 mM        | 62.57   | No | ns | >0.9999 |
| Butyrate vs. Butyrate | 250 $\mu$ M vs. 7.5 mM      | 65      | No | ns | >0.9999 |
| Butyrate vs. Butyrate | 250 $\mu$ M vs. 10 mM       | 74.36   | No | ns | >0.9999 |
| Butyrate vs. Butyrate | 250 $\mu$ M vs. 25 mM       | 81.36   | No | ns | >0.9999 |
| Butyrate vs. Combo    | 250 $\mu$ M vs. 50 pg/mL    | 4.857   | No | ns | >0.9999 |
| Butyrate vs. Combo    | 250 $\mu$ M vs. 100 pg/mL   | 24.86   | No | ns | >0.9999 |
| Butyrate vs. Combo    | 250 $\mu$ M vs. 150 pg/mL   | 16.86   | No | ns | >0.9999 |
| Butyrate vs. Combo    | 250 $\mu$ M vs. 200 pg/mL   | 19.19   | No | ns | >0.9999 |
| Butyrate vs. Combo    | 250 $\mu$ M vs. 250 pg/mL   | 19.52   | No | ns | >0.9999 |
| Butyrate vs. Combo    | 250 $\mu$ M vs. 500 pg/mL   | 36.52   | No | ns | >0.9999 |
| Butyrate vs. Combo    | 250 $\mu$ M vs. 1 ng/mL     | 52.86   | No | ns | >0.9999 |
| Butyrate vs. Combo    | 250 $\mu$ M vs. 2.5 ng/mL   | 91.52   | No | ns | >0.9999 |
| Butyrate vs. Combo    | 250 $\mu$ M vs. 5 ng/mL     | 99.52   | No | ns | >0.9999 |
| Butyrate vs. Butyrate | 500 $\mu$ M vs. 750 $\mu$ M | 4.143   | No | ns | >0.9999 |
| Butyrate vs. Butyrate | 500 $\mu$ M vs. 1 mM        | -3      | No | ns | >0.9999 |
| Butyrate vs. Butyrate | 500 $\mu$ M vs. 2.5 mM      | 37.86   | No | ns | >0.9999 |
| Butyrate vs. Butyrate | 500 $\mu$ M vs. 5 mM        | 46.43   | No | ns | >0.9999 |
| Butyrate vs. Butyrate | 500 $\mu$ M vs. 7.5 mM      | 48.86   | No | ns | >0.9999 |
| Butyrate vs. Butyrate | 500 $\mu$ M vs. 10 mM       | 58.21   | No | ns | >0.9999 |
| Butyrate vs. Butyrate | 500 $\mu$ M vs. 25 mM       | 65.21   | No | ns | >0.9999 |
| Butyrate vs. Combo    | 500 $\mu$ M vs. 50 pg/mL    | -11.29  | No | ns | >0.9999 |
| Butyrate vs. Combo    | 500 $\mu$ M vs. 100 pg/mL   | 8.714   | No | ns | >0.9999 |
| Butyrate vs. Combo    | 500 $\mu$ M vs. 150 pg/mL   | 0.7143  | No | ns | >0.9999 |
| Butyrate vs. Combo    | 500 $\mu$ M vs. 200 pg/mL   | 3.048   | No | ns | >0.9999 |
| Butyrate vs. Combo    | 500 $\mu$ M vs. 250 pg/mL   | 3.381   | No | ns | >0.9999 |
| Butyrate vs. Combo    | 500 $\mu$ M vs. 500 pg/mL   | 20.38   | No | ns | >0.9999 |
| Butyrate vs. Combo    | 500 $\mu$ M vs. 1 ng/mL     | 36.71   | No | ns | >0.9999 |
| Butyrate vs. Combo    | 500 $\mu$ M vs. 2.5 ng/mL   | 75.38   | No | ns | >0.9999 |
| Butyrate vs. Combo    | 500 $\mu$ M vs. 5 ng/mL     | 83.38   | No | ns | >0.9999 |
| Butyrate vs. Butyrate | 750 $\mu$ M vs. 1 mM        | -7.143  | No | ns | >0.9999 |
| Butyrate vs. Butyrate | 750 $\mu$ M vs. 2.5 mM      | 33.71   | No | ns | >0.9999 |
| Butyrate vs. Butyrate | 750 $\mu$ M vs. 5 mM        | 42.29   | No | ns | >0.9999 |
| Butyrate vs. Butyrate | 750 $\mu$ M vs. 7.5 mM      | 44.71   | No | ns | >0.9999 |
| Butyrate vs. Butyrate | 750 $\mu$ M vs. 10 mM       | 54.07   | No | ns | >0.9999 |
| Butyrate vs. Butyrate | 750 $\mu$ M vs. 25 mM       | 61.07   | No | ns | >0.9999 |
| Butyrate vs. Combo    | 750 $\mu$ M vs. 50 pg/mL    | -15.43  | No | ns | >0.9999 |
| Butyrate vs. Combo    | 750 $\mu$ M vs. 100 pg/mL   | 4.571   | No | ns | >0.9999 |
| Butyrate vs. Combo    | 750 $\mu$ M vs. 150 pg/mL   | -3.429  | No | ns | >0.9999 |
| Butyrate vs. Combo    | 750 $\mu$ M vs. 200 pg/mL   | -1.095  | No | ns | >0.9999 |
| Butyrate vs. Combo    | 750 $\mu$ M vs. 250 pg/mL   | -0.7619 | No | ns | >0.9999 |
| Butyrate vs. Combo    | 750 $\mu$ M vs. 500 pg/mL   | 16.24   | No | ns | >0.9999 |
| Butyrate vs. Combo    | 750 $\mu$ M vs. 1 ng/mL     | 32.57   | No | ns | >0.9999 |
| Butyrate vs. Combo    | 750 $\mu$ M vs. 2.5 ng/mL   | 71.24   | No | ns | >0.9999 |

|                       |                         |           |    |         |
|-----------------------|-------------------------|-----------|----|---------|
| Butyrate vs. Combo    | 750 $\mu$ M vs. 5 ng/mL | 79.24 No  | ns | >0.9999 |
| Butyrate vs. Butyrate | 1 mM vs. 2.5 mM         | 40.86 No  | ns | >0.9999 |
| Butyrate vs. Butyrate | 1 mM vs. 5 mM           | 49.43 No  | ns | >0.9999 |
| Butyrate vs. Butyrate | 1 mM vs. 7.5 mM         | 51.86 No  | ns | >0.9999 |
| Butyrate vs. Butyrate | 1 mM vs. 10 mM          | 61.21 No  | ns | >0.9999 |
| Butyrate vs. Butyrate | 1 mM vs. 25 mM          | 68.21 No  | ns | >0.9999 |
| Butyrate vs. Combo    | 1 mM vs. 50 pg/mL       | -8.286 No | ns | >0.9999 |
| Butyrate vs. Combo    | 1 mM vs. 100 pg/mL      | 11.71 No  | ns | >0.9999 |
| Butyrate vs. Combo    | 1 mM vs. 150 pg/mL      | 3.714 No  | ns | >0.9999 |
| Butyrate vs. Combo    | 1 mM vs. 200 pg/mL      | 6.048 No  | ns | >0.9999 |
| Butyrate vs. Combo    | 1 mM vs. 250 pg/mL      | 6.381 No  | ns | >0.9999 |
| Butyrate vs. Combo    | 1 mM vs. 500 pg/mL      | 23.38 No  | ns | >0.9999 |
| Butyrate vs. Combo    | 1 mM vs. 1 ng/mL        | 39.71 No  | ns | >0.9999 |
| Butyrate vs. Combo    | 1 mM vs. 2.5 ng/mL      | 78.38 No  | ns | >0.9999 |
| Butyrate vs. Combo    | 1 mM vs. 5 ng/mL        | 86.38 No  | ns | >0.9999 |
| Butyrate vs. Butyrate | 2.5 mM vs. 5 mM         | 8.571 No  | ns | >0.9999 |
| Butyrate vs. Butyrate | 2.5 mM vs. 7.5 mM       | 11 No     | ns | >0.9999 |
| Butyrate vs. Butyrate | 2.5 mM vs. 10 mM        | 20.36 No  | ns | >0.9999 |
| Butyrate vs. Butyrate | 2.5 mM vs. 25 mM        | 27.36 No  | ns | >0.9999 |
| Butyrate vs. Combo    | 2.5 mM vs. 50 pg/mL     | -49.14 No | ns | >0.9999 |
| Butyrate vs. Combo    | 2.5 mM vs. 100 pg/mL    | -29.14 No | ns | >0.9999 |
| Butyrate vs. Combo    | 2.5 mM vs. 150 pg/mL    | -37.14 No | ns | >0.9999 |
| Butyrate vs. Combo    | 2.5 mM vs. 200 pg/mL    | -34.81 No | ns | >0.9999 |
| Butyrate vs. Combo    | 2.5 mM vs. 250 pg/mL    | -34.48 No | ns | >0.9999 |
| Butyrate vs. Combo    | 2.5 mM vs. 500 pg/mL    | -17.48 No | ns | >0.9999 |
| Butyrate vs. Combo    | 2.5 mM vs. 1 ng/mL      | -1.143 No | ns | >0.9999 |
| Butyrate vs. Combo    | 2.5 mM vs. 2.5 ng/mL    | 37.52 No  | ns | >0.9999 |
| Butyrate vs. Combo    | 2.5 mM vs. 5 ng/mL      | 45.52 No  | ns | >0.9999 |
| Butyrate vs. Butyrate | 5 mM vs. 7.5 mM         | 2.429 No  | ns | >0.9999 |
| Butyrate vs. Butyrate | 5 mM vs. 10 mM          | 11.79 No  | ns | >0.9999 |
| Butyrate vs. Butyrate | 5 mM vs. 25 mM          | 18.79 No  | ns | >0.9999 |
| Butyrate vs. Combo    | 5 mM vs. 50 pg/mL       | -57.71 No | ns | >0.9999 |
| Butyrate vs. Combo    | 5 mM vs. 100 pg/mL      | -37.71 No | ns | >0.9999 |
| Butyrate vs. Combo    | 5 mM vs. 150 pg/mL      | -45.71 No | ns | >0.9999 |
| Butyrate vs. Combo    | 5 mM vs. 200 pg/mL      | -43.38 No | ns | >0.9999 |
| Butyrate vs. Combo    | 5 mM vs. 250 pg/mL      | -43.05 No | ns | >0.9999 |
| Butyrate vs. Combo    | 5 mM vs. 500 pg/mL      | -26.05 No | ns | >0.9999 |
| Butyrate vs. Combo    | 5 mM vs. 1 ng/mL        | -9.714 No | ns | >0.9999 |
| Butyrate vs. Combo    | 5 mM vs. 2.5 ng/mL      | 28.95 No  | ns | >0.9999 |
| Butyrate vs. Combo    | 5 mM vs. 5 ng/mL        | 36.95 No  | ns | >0.9999 |
| Butyrate vs. Butyrate | 7.5 mM vs. 10 mM        | 9.357 No  | ns | >0.9999 |
| Butyrate vs. Butyrate | 7.5 mM vs. 25 mM        | 16.36 No  | ns | >0.9999 |
| Butyrate vs. Combo    | 7.5 mM vs. 50 pg/mL     | -60.14 No | ns | >0.9999 |
| Butyrate vs. Combo    | 7.5 mM vs. 100 pg/mL    | -40.14 No | ns | >0.9999 |
| Butyrate vs. Combo    | 7.5 mM vs. 150 pg/mL    | -48.14 No | ns | >0.9999 |
| Butyrate vs. Combo    | 7.5 mM vs. 200 pg/mL    | -45.81 No | ns | >0.9999 |
| Butyrate vs. Combo    | 7.5 mM vs. 250 pg/mL    | -45.48 No | ns | >0.9999 |

|                       |                         |        |    |    |         |
|-----------------------|-------------------------|--------|----|----|---------|
| Butyrate vs. Combo    | 7.5 mM vs. 500 pg/mL    | -28.48 | No | ns | >0.9999 |
| Butyrate vs. Combo    | 7.5 mM vs. 1 ng/mL      | -12.14 | No | ns | >0.9999 |
| Butyrate vs. Combo    | 7.5 mM vs. 2.5 ng/mL    | 26.52  | No | ns | >0.9999 |
| Butyrate vs. Combo    | 7.5 mM vs. 5 ng/mL      | 34.52  | No | ns | >0.9999 |
| Butyrate vs. Butyrate | 10 mM vs. 25 mM         | 7      | No | ns | >0.9999 |
| Butyrate vs. Combo    | 10 mM vs. 50 pg/mL      | -69.5  | No | ns | >0.9999 |
| Butyrate vs. Combo    | 10 mM vs. 100 pg/mL     | -49.5  | No | ns | >0.9999 |
| Butyrate vs. Combo    | 10 mM vs. 150 pg/mL     | -57.5  | No | ns | >0.9999 |
| Butyrate vs. Combo    | 10 mM vs. 200 pg/mL     | -55.17 | No | ns | >0.9999 |
| Butyrate vs. Combo    | 10 mM vs. 250 pg/mL     | -54.83 | No | ns | >0.9999 |
| Butyrate vs. Combo    | 10 mM vs. 500 pg/mL     | -37.83 | No | ns | >0.9999 |
| Butyrate vs. Combo    | 10 mM vs. 1 ng/mL       | -21.5  | No | ns | >0.9999 |
| Butyrate vs. Combo    | 10 mM vs. 2.5 ng/mL     | 17.17  | No | ns | >0.9999 |
| Butyrate vs. Combo    | 10 mM vs. 5 ng/mL       | 25.17  | No | ns | >0.9999 |
| Butyrate vs. Combo    | 25 mM vs. 50 pg/mL      | -76.5  | No | ns | >0.9999 |
| Butyrate vs. Combo    | 25 mM vs. 100 pg/mL     | -56.5  | No | ns | >0.9999 |
| Butyrate vs. Combo    | 25 mM vs. 150 pg/mL     | -64.5  | No | ns | >0.9999 |
| Butyrate vs. Combo    | 25 mM vs. 200 pg/mL     | -62.17 | No | ns | >0.9999 |
| Butyrate vs. Combo    | 25 mM vs. 250 pg/mL     | -61.83 | No | ns | >0.9999 |
| Butyrate vs. Combo    | 25 mM vs. 500 pg/mL     | -44.83 | No | ns | >0.9999 |
| Butyrate vs. Combo    | 25 mM vs. 1 ng/mL       | -28.5  | No | ns | >0.9999 |
| Butyrate vs. Combo    | 25 mM vs. 2.5 ng/mL     | 10.17  | No | ns | >0.9999 |
| Butyrate vs. Combo    | 25 mM vs. 5 ng/mL       | 18.17  | No | ns | >0.9999 |
| Combo vs. Combo       | 50 pg/mL vs. 100 pg/mL  | 20     | No | ns | >0.9999 |
| Combo vs. Combo       | 50 pg/mL vs. 150 pg/mL  | 12     | No | ns | >0.9999 |
| Combo vs. Combo       | 50 pg/mL vs. 200 pg/mL  | 14.33  | No | ns | >0.9999 |
| Combo vs. Combo       | 50 pg/mL vs. 250 pg/mL  | 14.67  | No | ns | >0.9999 |
| Combo vs. Combo       | 50 pg/mL vs. 500 pg/mL  | 31.67  | No | ns | >0.9999 |
| Combo vs. Combo       | 50 pg/mL vs. 1 ng/mL    | 48     | No | ns | >0.9999 |
| Combo vs. Combo       | 50 pg/mL vs. 2.5 ng/mL  | 86.67  | No | ns | >0.9999 |
| Combo vs. Combo       | 50 pg/mL vs. 5 ng/mL    | 94.67  | No | ns | >0.9999 |
| Combo vs. Combo       | 100 pg/mL vs. 150 pg/mL | -8     | No | ns | >0.9999 |
| Combo vs. Combo       | 100 pg/mL vs. 200 pg/mL | -5.667 | No | ns | >0.9999 |
| Combo vs. Combo       | 100 pg/mL vs. 250 pg/mL | -5.333 | No | ns | >0.9999 |
| Combo vs. Combo       | 100 pg/mL vs. 500 pg/mL | 11.67  | No | ns | >0.9999 |
| Combo vs. Combo       | 100 pg/mL vs. 1 ng/mL   | 28     | No | ns | >0.9999 |
| Combo vs. Combo       | 100 pg/mL vs. 2.5 ng/mL | 66.67  | No | ns | >0.9999 |
| Combo vs. Combo       | 100 pg/mL vs. 5 ng/mL   | 74.67  | No | ns | >0.9999 |
| Combo vs. Combo       | 150 pg/mL vs. 200 pg/mL | 2.333  | No | ns | >0.9999 |
| Combo vs. Combo       | 150 pg/mL vs. 250 pg/mL | 2.667  | No | ns | >0.9999 |
| Combo vs. Combo       | 150 pg/mL vs. 500 pg/mL | 19.67  | No | ns | >0.9999 |
| Combo vs. Combo       | 150 pg/mL vs. 1 ng/mL   | 36     | No | ns | >0.9999 |
| Combo vs. Combo       | 150 pg/mL vs. 2.5 ng/mL | 74.67  | No | ns | >0.9999 |
| Combo vs. Combo       | 150 pg/mL vs. 5 ng/mL   | 82.67  | No | ns | >0.9999 |
| Combo vs. Combo       | 200 pg/mL vs. 250 pg/mL | 0.3333 | No | ns | >0.9999 |
| Combo vs. Combo       | 200 pg/mL vs. 500 pg/mL | 17.33  | No | ns | >0.9999 |
| Combo vs. Combo       | 200 pg/mL vs. 1 ng/mL   | 33.67  | No | ns | >0.9999 |

|                 |                         |          |    |         |
|-----------------|-------------------------|----------|----|---------|
| Combo vs. Combo | 200 pg/mL vs. 2.5 ng/mL | 72.33 No | ns | >0.9999 |
| Combo vs. Combo | 200 pg/mL vs. 5 ng/mL   | 80.33 No | ns | >0.9999 |
| Combo vs. Combo | 250 pg/mL vs. 500 pg/mL | 17 No    | ns | >0.9999 |
| Combo vs. Combo | 250 pg/mL vs. 1 ng/mL   | 33.33 No | ns | >0.9999 |
| Combo vs. Combo | 250 pg/mL vs. 2.5 ng/mL | 72 No    | ns | >0.9999 |
| Combo vs. Combo | 250 pg/mL vs. 5 ng/mL   | 80 No    | ns | >0.9999 |
| Combo vs. Combo | 500 pg/mL vs. 1 ng/mL   | 16.33 No | ns | >0.9999 |
| Combo vs. Combo | 500 pg/mL vs. 2.5 ng/mL | 55 No    | ns | >0.9999 |
| Combo vs. Combo | 500 pg/mL vs. 5 ng/mL   | 63 No    | ns | >0.9999 |
| Combo vs. Combo | 1 ng/mL vs. 2.5 ng/mL   | 38.67 No | ns | >0.9999 |
| Combo vs. Combo | 1 ng/mL vs. 5 ng/mL     | 46.67 No | ns | >0.9999 |
| Combo vs. Combo | 2.5 ng/mL vs. 5 ng/mL   |          |    |         |

Value

A-B

A-C

A-D

A-E

A-F

A-G

A-H

A-I

A-J

A-K

A-L

A-M

A-N

A-O

A-P

A-Q

A-R

A-S

A-T

A-U

A-V

A-W

A-X

A-Y

A-Z

A-AA

A-AB

A-AC

A-AD

A-AE

A-AF

A-AG

B-C

B-D

B-E

B-F

B-G

B-H

B-I

B-J

B-K

B-L

B-M

B-N

B-O

B-P

B-Q  
B-R  
B-S  
B-T  
B-U  
B-V  
B-W  
B-X  
B-Y  
B-Z  
B-AA  
B-AB  
B-AC  
B-AD  
B-AE  
B-AF  
B-AG  
C-D  
C-E  
C-F  
C-G  
C-H  
C-I  
C-J  
C-K  
C-L  
C-M  
C-N  
C-O  
C-P  
C-Q  
C-R  
C-S  
C-T  
C-U  
C-V  
C-W  
C-X  
C-Y  
C-Z  
C-AA  
C-AB  
C-AC  
C-AD  
C-AE  
C-AF  
C-AG

D-E  
D-F  
D-G  
D-H  
D-I  
D-J  
D-K  
D-L  
D-M  
D-N  
D-O  
D-P  
D-Q  
D-R  
D-S  
D-T  
D-U  
D-V  
D-W  
D-X

D-Y  
D-Z  
D-AA  
D-AB  
D-AC  
D-AD  
D-AE  
D-AF  
D-AG

E-F  
E-G  
E-H  
E-I  
E-J  
E-K  
E-L  
E-M  
E-N  
E-O  
E-P  
E-Q  
E-R  
E-S  
E-T  
E-U  
E-V  
E-W

E-X

E-Y

E-Z

E-AA

E-AB

E-AC

E-AD

E-AE

E-AF

E-AG

F-G

F-H

F-I

F-J

F-K

F-L

F-M

F-N

F-O

F-P

F-Q

F-R

F-S

F-T

F-U

F-V

F-W

F-X

F-Y

F-Z

F-AA

F-AB

F-AC

F-AD

F-AE

F-AF

F-AG

G-H

G-I

G-J

G-K

G-L

G-M

G-N

G-O

G-P

G-Q

G-R  
G-S  
G-T  
G-U  
G-V  
G-W  
G-X

G-Y  
G-Z  
G-AA  
G-AB  
G-AC  
G-AD  
G-AE  
G-AF  
G-AG

H-I  
H-J  
H-K  
H-L  
H-M  
H-N  
H-O  
H-P  
H-Q  
H-R  
H-S  
H-T  
H-U  
H-V  
H-W  
H-X

H-Y  
H-Z  
H-AA  
H-AB  
H-AC  
H-AD  
H-AE  
H-AF  
H-AG

I-J  
I-K  
I-L  
I-M  
I-N  
I-O

I-P

I-Q

I-R

I-S

I-T

I-U

I-V

I-W

I-X

I-Y

I-Z

I-AA

I-AB

I-AC

I-AD

I-AE

I-AF

I-AG

J-K

J-L

J-M

J-N

J-O

J-P

J-Q

J-R

J-S

J-T

J-U

J-V

J-W

J-X

J-Y

J-Z

J-AA

J-AB

J-AC

J-AD

J-AE

J-AF

J-AG

K-L

K-M

K-N

K-O

K-P

K-Q

K-R  
K-S  
K-T  
K-U  
K-V  
K-W  
K-X

K-Y  
K-Z  
K-AA  
K-AB  
K-AC  
K-AD  
K-AE  
K-AF  
K-AG

L-M  
L-N  
L-O  
L-P  
L-Q  
L-R  
L-S  
L-T  
L-U  
L-V  
L-W  
L-X

L-Y  
L-Z  
L-AA  
L-AB  
L-AC  
L-AD  
L-AE  
L-AF  
L-AG

M-N  
M-O  
M-P  
M-Q  
M-R  
M-S  
M-T  
M-U  
M-V  
M-W

M-X  
M-Y  
M-Z  
M-AA  
M-AB  
M-AC  
M-AD  
M-AE  
M-AF  
M-AG  
N-O  
N-P  
N-Q  
N-R  
N-S  
N-T  
N-U  
N-V  
N-W  
N-X  
N-Y  
N-Z  
N-AA  
N-AB  
N-AC  
N-AD  
N-AE  
N-AF  
N-AG  
O-P  
O-Q  
O-R  
O-S  
O-T  
O-U  
O-V  
O-W  
O-X  
O-Y  
O-Z  
O-AA  
O-AB  
O-AC  
O-AD  
O-AE  
O-AF  
O-AG

P-Q  
P-R  
P-S  
P-T  
P-U  
P-V  
P-W  
P-X  
P-Y  
P-Z  
P-AA  
P-AB  
P-AC  
P-AD  
P-AE  
P-AF  
P-AG  
Q-R  
Q-S  
Q-T  
Q-U  
Q-V  
Q-W  
Q-X  
Q-Y  
Q-Z  
Q-AA  
Q-AB  
Q-AC  
Q-AD  
Q-AE  
Q-AF  
Q-AG  
R-S  
R-T  
R-U  
R-V  
R-W  
R-X  
R-Y  
R-Z  
R-AA  
R-AB  
R-AC  
R-AD  
R-AE  
R-AF

R-AG  
S-T  
S-U  
S-V  
S-W  
S-X  
S-Y  
S-Z  
S-AA  
S-AB  
S-AC  
S-AD  
S-AE  
S-AF  
S-AG  
T-U  
T-V  
T-W  
T-X  
T-Y  
T-Z  
T-AA  
T-AB  
T-AC  
T-AD  
T-AE  
T-AF  
T-AG  
U-V  
U-W  
U-X  
U-Y  
U-Z  
U-AA  
U-AB  
U-AC  
U-AD  
U-AE  
U-AF  
U-AG  
V-W  
V-X  
V-Y  
V-Z  
V-AA  
V-AB  
V-AC

V-AD  
V-AE  
V-AF  
V-AG  
W-X  
W-Y  
W-Z  
W-AA  
W-AB  
W-AC  
W-AD  
W-AE  
W-AF  
W-AG  
X-Y  
X-Z  
X-AA  
X-AB  
X-AC  
X-AD  
X-AE  
X-AF  
X-AG  
Y-Z  
Y-AA  
Y-AB  
Y-AC  
Y-AD  
Y-AE  
Y-AF  
Y-AG  
Z-AA  
Z-AB  
Z-AC  
Z-AD  
Z-AE  
Z-AF  
Z-AG  
AA-AB  
AA-AC  
AA-AD  
AA-AE  
AA-AF  
AA-AG  
AB-AC  
AB-AD  
AB-AE

AB-AF  
AB-AG  
AC-AD  
AC-AE  
AC-AF  
AC-AG  
AD-AE  
AD-AF  
AD-AG  
AE-AF  
AE-AG

| Treatment          | Dunn's multiple comparisons test | Mean rank | Significant' | Summary |
|--------------------|----------------------------------|-----------|--------------|---------|
| Media Vs. FCCP     | Media vs. 10 $\mu$ M FCCP        | 39.3      | No           | ns      |
| Media vs. TNFa     | Media vs. 50 pg/mL               | 3.8       | No           | ns      |
| Media vs. TNFa     | Media vs. 100 pg/mL              | 10.47     | No           | ns      |
| Media vs. TNFa     | Media vs. 150 pg/mL              | 1.467     | No           | ns      |
| Media vs. TNFa     | Media vs. 200 pg/mL              | 15.47     | No           | ns      |
| Media vs. TNFa     | Media vs. 250 pg/mL              | 12.13     | No           | ns      |
| Media vs. TNFa     | Media vs. 500 pg/mL              | 19.13     | No           | ns      |
| Media vs. TNFa     | Media vs. 1 ng/mL                | 17.47     | No           | ns      |
| Media vs. TNFa     | Media vs. 2.5 ng/mL              | 33.13     | No           | ns      |
| Media vs. TNFa     | Media vs. 5 ng/mL                | 19.47     | No           | ns      |
| Media vs. Butyrate | Media vs. 50 $\mu$ M             | -30.2     | No           | ns      |
| Media vs. Butyrate | Media vs. 75 $\mu$ M             | -31.87    | No           | ns      |
| Media vs. Butyrate | Media vs. 100 $\mu$ M            | -22.87    | No           | ns      |
| Media vs. Butyrate | Media vs. 250 $\mu$ M            | 0.1333    | No           | ns      |
| Media vs. Butyrate | Media vs. 500 $\mu$ M            | -7.2      | No           | ns      |
| Media vs. Butyrate | Media vs. 750 $\mu$ M            | -17.2     | No           | ns      |
| Media vs. Butyrate | Media vs. 1 mM                   | -22.2     | No           | ns      |
| Media vs. Butyrate | Media vs. 2.5 mM                 | -28.2     | No           | ns      |
| Media vs. Butyrate | Media vs. 5 mM                   | 0.4667    | No           | ns      |
| Media vs. Butyrate | Media vs. 7.5 mM                 | -0.2      | No           | ns      |
| Media Vs. Combo    | Media vs. 50 pg/mL               | -32.87    | No           | ns      |
| Media Vs. Combo    | Media vs. 100 pg/mL              | 7.467     | No           | ns      |
| Media Vs. Combo    | Media vs. 150 pg/mL              | -14.7     | No           | ns      |
| Media Vs. Combo    | Media vs. 200 pg/mL              | -22.7     | No           | ns      |
| Media Vs. Combo    | Media vs. 250 pg/mL              | -33.2     | No           | ns      |
| Media Vs. Combo    | Media vs. 500 pg/mL              | -42.53    | No           | ns      |
| Media Vs. Combo    | Media vs. 1 ng/mL                | -28.2     | No           | ns      |
| Media Vs. Combo    | Media vs. 2.5 ng/mL              | -17.53    | No           | ns      |
| Media Vs. Combo    | Media vs. 5 ng/mL                | -4.533    | No           | ns      |
| FCCp vs. TNFa      | 10 $\mu$ M FCCP vs. 50 pg/mL     | -35.5     | No           | ns      |
| FCCp vs. TNFa      | 10 $\mu$ M FCCP vs. 100 pg/mL    | -28.83    | No           | ns      |
| FCCp vs. TNFa      | 10 $\mu$ M FCCP vs. 150 pg/mL    | -37.83    | No           | ns      |
| FCCp vs. TNFa      | 10 $\mu$ M FCCP vs. 200 pg/mL    | -23.83    | No           | ns      |
| FCCp vs. TNFa      | 10 $\mu$ M FCCP vs. 250 pg/mL    | -27.17    | No           | ns      |
| FCCp vs. TNFa      | 10 $\mu$ M FCCP vs. 500 pg/mL    | -20.17    | No           | ns      |
| FCCp vs. TNFa      | 10 $\mu$ M FCCP vs. 1 ng/mL      | -21.83    | No           | ns      |
| FCCp vs. TNFa      | 10 $\mu$ M FCCP vs. 2.5 ng/mL    | -6.167    | No           | ns      |
| FCCp vs. TNFa      | 10 $\mu$ M FCCP vs. 5 ng/mL      | -19.83    | No           | ns      |
| FCCp vs. Butyrate  | 10 $\mu$ M FCCP vs. 50 $\mu$ M   | -69.5     | No           | ns      |
| FCCp vs. Butyrate  | 10 $\mu$ M FCCP vs. 75 $\mu$ M   | -71.17    | No           | ns      |
| FCCp vs. Butyrate  | 10 $\mu$ M FCCP vs. 100 $\mu$ M  | -62.17    | No           | ns      |
| FCCp vs. Butyrate  | 10 $\mu$ M FCCP vs. 250 $\mu$ M  | -39.17    | No           | ns      |
| FCCp vs. Butyrate  | 10 $\mu$ M FCCP vs. 500 $\mu$ M  | -46.5     | No           | ns      |
| FCCp vs. Butyrate  | 10 $\mu$ M FCCP vs. 750 $\mu$ M  | -56.5     | No           | ns      |
| FCCp vs. Butyrate  | 10 $\mu$ M FCCP vs. 1 mM         | -61.5     | No           | ns      |
| FCCp vs. Butyrate  | 10 $\mu$ M FCCP vs. 2.5 mM       | -67.5     | No           | ns      |

|                   |                               |            |    |
|-------------------|-------------------------------|------------|----|
| FCCp vs. Butyrate | 10 $\mu$ M FCCP vs. 5 mM      | -38.83 No  | ns |
| FCCp vs. Butyrate | 10 $\mu$ M FCCP vs. 7.5 mM    | -39.5 No   | ns |
| FCCp Vs. Combo    | 10 $\mu$ M FCCP vs. 50 pg/mL  | -72.17 No  | ns |
| FCCp Vs. Combo    | 10 $\mu$ M FCCP vs. 100 pg/mL | -31.83 No  | ns |
| FCCp Vs. Combo    | 10 $\mu$ M FCCP vs. 150 pg/mL | -54 No     | ns |
| FCCp Vs. Combo    | 10 $\mu$ M FCCP vs. 200 pg/mL | -62 No     | ns |
| FCCp Vs. Combo    | 10 $\mu$ M FCCP vs. 250 pg/mL | -72.5 No   | ns |
| FCCp Vs. Combo    | 10 $\mu$ M FCCP vs. 500 pg/mL | -81.83 Yes | ** |
| FCCp Vs. Combo    | 10 $\mu$ M FCCP vs. 1 ng/mL   | -67.5 No   | ns |
| FCCp Vs. Combo    | 10 $\mu$ M FCCP vs. 2.5 ng/mL | -56.83 No  | ns |
| FCCp Vs. Combo    | 10 $\mu$ M FCCP vs. 5 ng/mL   | -43.83 No  | ns |
| TNFa vs. TNFa     | 50 pg/mL vs. 100 pg/mL        | 6.667 No   | ns |
| TNFa vs. TNFa     | 50 pg/mL vs. 150 pg/mL        | -2.333 No  | ns |
| TNFa vs. TNFa     | 50 pg/mL vs. 200 pg/mL        | 11.67 No   | ns |
| TNFa vs. TNFa     | 50 pg/mL vs. 250 pg/mL        | 8.333 No   | ns |
| TNFa vs. TNFa     | 50 pg/mL vs. 500 pg/mL        | 15.33 No   | ns |
| TNFa vs. TNFa     | 50 pg/mL vs. 1 ng/mL          | 13.67 No   | ns |
| TNFa vs. TNFa     | 50 pg/mL vs. 2.5 ng/mL        | 29.33 No   | ns |
| TNFa vs. TNFa     | 50 pg/mL vs. 5 ng/mL          | 15.67 No   | ns |
| TNFa vs. Butyrate | 50 pg/mL vs. 50 $\mu$ M       | -34 No     | ns |
| TNFa vs. Butyrate | 50 pg/mL vs. 75 $\mu$ M       | -35.67 No  | ns |
| TNFa vs. Butyrate | 50 pg/mL vs. 100 $\mu$ M      | -26.67 No  | ns |
| TNFa vs. Butyrate | 50 pg/mL vs. 250 $\mu$ M      | -3.667 No  | ns |
| TNFa vs. Butyrate | 50 pg/mL vs. 500 $\mu$ M      | -11 No     | ns |
| TNFa vs. Butyrate | 50 pg/mL vs. 750 $\mu$ M      | -21 No     | ns |
| TNFa vs. Butyrate | 50 pg/mL vs. 1 mM             | -26 No     | ns |
| TNFa vs. Butyrate | 50 pg/mL vs. 2.5 mM           | -32 No     | ns |
| TNFa vs. Butyrate | 50 pg/mL vs. 5 mM             | -3.333 No  | ns |
| TNFa vs. Butyrate | 50 pg/mL vs. 7.5 mM           | -4 No      | ns |
| TNFa vs. Combo    | 50 pg/mL vs. 50 pg/mL         | -36.67 No  | ns |
| TNFa vs. Combo    | 50 pg/mL vs. 100 pg/mL        | 3.667 No   | ns |
| TNFa vs. Combo    | 50 pg/mL vs. 150 pg/mL        | -18.5 No   | ns |
| TNFa vs. Combo    | 50 pg/mL vs. 200 pg/mL        | -26.5 No   | ns |
| TNFa vs. Combo    | 50 pg/mL vs. 250 pg/mL        | -37 No     | ns |
| TNFa vs. Combo    | 50 pg/mL vs. 500 pg/mL        | -46.33 No  | ns |
| TNFa vs. Combo    | 50 pg/mL vs. 1 ng/mL          | -32 No     | ns |
| TNFa vs. Combo    | 50 pg/mL vs. 2.5 ng/mL        | -21.33 No  | ns |
| TNFa vs. Combo    | 50 pg/mL vs. 5 ng/mL          | -8.333 No  | ns |
| TNFa vs. TNFa     | 100 pg/mL vs. 150 pg/mL       | -9 No      | ns |
| TNFa vs. TNFa     | 100 pg/mL vs. 200 pg/mL       | 5 No       | ns |
| TNFa vs. TNFa     | 100 pg/mL vs. 250 pg/mL       | 1.667 No   | ns |
| TNFa vs. TNFa     | 100 pg/mL vs. 500 pg/mL       | 8.667 No   | ns |
| TNFa vs. TNFa     | 100 pg/mL vs. 1 ng/mL         | 7 No       | ns |
| TNFa vs. TNFa     | 100 pg/mL vs. 2.5 ng/mL       | 22.67 No   | ns |
| TNFa vs. TNFa     | 100 pg/mL vs. 5 ng/mL         | 9 No       | ns |
| TNFa vs. Butyrate | 100 pg/mL vs. 50 $\mu$ M      | -40.67 No  | ns |
| TNFa vs. Butyrate | 100 pg/mL vs. 75 $\mu$ M      | -42.33 No  | ns |

|                   |                         |           |    |
|-------------------|-------------------------|-----------|----|
| TNFa vs. Butyrate | 100 pg/mL vs. 100 µM    | -33.33 No | ns |
| TNFa vs. Butyrate | 100 pg/mL vs. 250 µM    | -10.33 No | ns |
| TNFa vs. Butyrate | 100 pg/mL vs. 500 µM    | -17.67 No | ns |
| TNFa vs. Butyrate | 100 pg/mL vs. 750 µM    | -27.67 No | ns |
| TNFa vs. Butyrate | 100 pg/mL vs. 1 mM      | -32.67 No | ns |
| TNFa vs. Butyrate | 100 pg/mL vs. 2.5 mM    | -38.67 No | ns |
| TNFa vs. Butyrate | 100 pg/mL vs. 5 mM      | -10 No    | ns |
| TNFa vs. Butyrate | 100 pg/mL vs. 7.5 mM    | -10.67 No | ns |
| TNFa vs. Combo    | 100 pg/mL vs. 50 pg/mL  | -43.33 No | ns |
| TNFa vs. Combo    | 100 pg/mL vs. 100 pg/mL | -3 No     | ns |
| TNFa vs. Combo    | 100 pg/mL vs. 150 pg/mL | -25.17 No | ns |
| TNFa vs. Combo    | 100 pg/mL vs. 200 pg/mL | -33.17 No | ns |
| TNFa vs. Combo    | 100 pg/mL vs. 250 pg/mL | -43.67 No | ns |
| TNFa vs. Combo    | 100 pg/mL vs. 500 pg/mL | -53 No    | ns |
| TNFa vs. Combo    | 100 pg/mL vs. 1 ng/mL   | -38.67 No | ns |
| TNFa vs. Combo    | 100 pg/mL vs. 2.5 ng/mL | -28 No    | ns |
| TNFa vs. Combo    | 100 pg/mL vs. 5 ng/mL   | -15 No    | ns |
| TNFa vs. TNFa     | 150 pg/mL vs. 200 pg/mL | 14 No     | ns |
| TNFa vs. TNFa     | 150 pg/mL vs. 250 pg/mL | 10.67 No  | ns |
| TNFa vs. TNFa     | 150 pg/mL vs. 500 pg/mL | 17.67 No  | ns |
| TNFa vs. TNFa     | 150 pg/mL vs. 1 ng/mL   | 16 No     | ns |
| TNFa vs. TNFa     | 150 pg/mL vs. 2.5 ng/mL | 31.67 No  | ns |
| TNFa vs. TNFa     | 150 pg/mL vs. 5 ng/mL   | 18 No     | ns |
| TNFa vs. Butyrate | 150 pg/mL vs. 50 µM     | -31.67 No | ns |
| TNFa vs. Butyrate | 150 pg/mL vs. 75 µM     | -33.33 No | ns |
| TNFa vs. Butyrate | 150 pg/mL vs. 100 µM    | -24.33 No | ns |
| TNFa vs. Butyrate | 150 pg/mL vs. 250 µM    | -1.333 No | ns |
| TNFa vs. Butyrate | 150 pg/mL vs. 500 µM    | -8.667 No | ns |
| TNFa vs. Butyrate | 150 pg/mL vs. 750 µM    | -18.67 No | ns |
| TNFa vs. Butyrate | 150 pg/mL vs. 1 mM      | -23.67 No | ns |
| TNFa vs. Butyrate | 150 pg/mL vs. 2.5 mM    | -29.67 No | ns |
| TNFa vs. Butyrate | 150 pg/mL vs. 5 mM      | -1 No     | ns |
| TNFa vs. Butyrate | 150 pg/mL vs. 7.5 mM    | -1.667 No | ns |
| TNFa vs. Combo    | 150 pg/mL vs. 50 pg/mL  | -34.33 No | ns |
| TNFa vs. Combo    | 150 pg/mL vs. 100 pg/mL | 6 No      | ns |
| TNFa vs. Combo    | 150 pg/mL vs. 150 pg/mL | -16.17 No | ns |
| TNFa vs. Combo    | 150 pg/mL vs. 200 pg/mL | -24.17 No | ns |
| TNFa vs. Combo    | 150 pg/mL vs. 250 pg/mL | -34.67 No | ns |
| TNFa vs. Combo    | 150 pg/mL vs. 500 pg/mL | -44 No    | ns |
| TNFa vs. Combo    | 150 pg/mL vs. 1 ng/mL   | -29.67 No | ns |
| TNFa vs. Combo    | 150 pg/mL vs. 2.5 ng/mL | -19 No    | ns |
| TNFa vs. Combo    | 150 pg/mL vs. 5 ng/mL   | -6 No     | ns |
| TNFa vs. TNFa     | 200 pg/mL vs. 250 pg/mL | -3.333 No | ns |
| TNFa vs. TNFa     | 200 pg/mL vs. 500 pg/mL | 3.667 No  | ns |
| TNFa vs. TNFa     | 200 pg/mL vs. 1 ng/mL   | 2 No      | ns |
| TNFa vs. TNFa     | 200 pg/mL vs. 2.5 ng/mL | 17.67 No  | ns |
| TNFa vs. TNFa     | 200 pg/mL vs. 5 ng/mL   | 4 No      | ns |

|                   |                         |           |    |
|-------------------|-------------------------|-----------|----|
| TNFa vs. Butyrate | 200 pg/mL vs. 50 µM     | -45.67 No | ns |
| TNFa vs. Butyrate | 200 pg/mL vs. 75 µM     | -47.33 No | ns |
| TNFa vs. Butyrate | 200 pg/mL vs. 100 µM    | -38.33 No | ns |
| TNFa vs. Butyrate | 200 pg/mL vs. 250 µM    | -15.33 No | ns |
| TNFa vs. Butyrate | 200 pg/mL vs. 500 µM    | -22.67 No | ns |
| TNFa vs. Butyrate | 200 pg/mL vs. 750 µM    | -32.67 No | ns |
| TNFa vs. Butyrate | 200 pg/mL vs. 1 mM      | -37.67 No | ns |
| TNFa vs. Butyrate | 200 pg/mL vs. 2.5 mM    | -43.67 No | ns |
| TNFa vs. Butyrate | 200 pg/mL vs. 5 mM      | -15 No    | ns |
| TNFa vs. Butyrate | 200 pg/mL vs. 7.5 mM    | -15.67 No | ns |
| TNFa vs. Combo    | 200 pg/mL vs. 50 pg/mL  | -48.33 No | ns |
| TNFa vs. Combo    | 200 pg/mL vs. 100 pg/mL | -8 No     | ns |
| TNFa vs. Combo    | 200 pg/mL vs. 150 pg/mL | -30.17 No | ns |
| TNFa vs. Combo    | 200 pg/mL vs. 200 pg/mL | -38.17 No | ns |
| TNFa vs. Combo    | 200 pg/mL vs. 250 pg/mL | -48.67 No | ns |
| TNFa vs. Combo    | 200 pg/mL vs. 500 pg/mL | -58 No    | ns |
| TNFa vs. Combo    | 200 pg/mL vs. 1 ng/mL   | -43.67 No | ns |
| TNFa vs. Combo    | 200 pg/mL vs. 2.5 ng/mL | -33 No    | ns |
| TNFa vs. Combo    | 200 pg/mL vs. 5 ng/mL   | -20 No    | ns |
| TNFa vs. TNFa     | 250 pg/mL vs. 500 pg/mL | 7 No      | ns |
| TNFa vs. TNFa     | 250 pg/mL vs. 1 ng/mL   | 5.333 No  | ns |
| TNFa vs. TNFa     | 250 pg/mL vs. 2.5 ng/mL | 21 No     | ns |
| TNFa vs. TNFa     | 250 pg/mL vs. 5 ng/mL   | 7.333 No  | ns |
| TNFa vs. Butyrate | 250 pg/mL vs. 50 µM     | -42.33 No | ns |
| TNFa vs. Butyrate | 250 pg/mL vs. 75 µM     | -44 No    | ns |
| TNFa vs. Butyrate | 250 pg/mL vs. 100 µM    | -35 No    | ns |
| TNFa vs. Butyrate | 250 pg/mL vs. 250 µM    | -12 No    | ns |
| TNFa vs. Butyrate | 250 pg/mL vs. 500 µM    | -19.33 No | ns |
| TNFa vs. Butyrate | 250 pg/mL vs. 750 µM    | -29.33 No | ns |
| TNFa vs. Butyrate | 250 pg/mL vs. 1 mM      | -34.33 No | ns |
| TNFa vs. Butyrate | 250 pg/mL vs. 2.5 mM    | -40.33 No | ns |
| TNFa vs. Butyrate | 250 pg/mL vs. 5 mM      | -11.67 No | ns |
| TNFa vs. Butyrate | 250 pg/mL vs. 7.5 mM    | -12.33 No | ns |
| TNFa vs. Combo    | 250 pg/mL vs. 50 pg/mL  | -45 No    | ns |
| TNFa vs. Combo    | 250 pg/mL vs. 100 pg/mL | -4.667 No | ns |
| TNFa vs. Combo    | 250 pg/mL vs. 150 pg/mL | -26.83 No | ns |
| TNFa vs. Combo    | 250 pg/mL vs. 200 pg/mL | -34.83 No | ns |
| TNFa vs. Combo    | 250 pg/mL vs. 250 pg/mL | -45.33 No | ns |
| TNFa vs. Combo    | 250 pg/mL vs. 500 pg/mL | -54.67 No | ns |
| TNFa vs. Combo    | 250 pg/mL vs. 1 ng/mL   | -40.33 No | ns |
| TNFa vs. Combo    | 250 pg/mL vs. 2.5 ng/mL | -29.67 No | ns |
| TNFa vs. Combo    | 250 pg/mL vs. 5 ng/mL   | -16.67 No | ns |
| TNFa vs. TNFa     | 500 pg/mL vs. 1 ng/mL   | -1.667 No | ns |
| TNFa vs. TNFa     | 500 pg/mL vs. 2.5 ng/mL | 14 No     | ns |
| TNFa vs. TNFa     | 500 pg/mL vs. 5 ng/mL   | 0.3333 No | ns |
| TNFa vs. Butyrate | 500 pg/mL vs. 50 µM     | -49.33 No | ns |
| TNFa vs. Butyrate | 500 pg/mL vs. 75 µM     | -51 No    | ns |

|                   |                         |           |    |
|-------------------|-------------------------|-----------|----|
| TNFa vs. Butyrate | 500 pg/mL vs. 100 µM    | -42 No    | ns |
| TNFa vs. Butyrate | 500 pg/mL vs. 250 µM    | -19 No    | ns |
| TNFa vs. Butyrate | 500 pg/mL vs. 500 µM    | -26.33 No | ns |
| TNFa vs. Butyrate | 500 pg/mL vs. 750 µM    | -36.33 No | ns |
| TNFa vs. Butyrate | 500 pg/mL vs. 1 mM      | -41.33 No | ns |
| TNFa vs. Butyrate | 500 pg/mL vs. 2.5 mM    | -47.33 No | ns |
| TNFa vs. Butyrate | 500 pg/mL vs. 5 mM      | -18.67 No | ns |
| TNFa vs. Butyrate | 500 pg/mL vs. 7.5 mM    | -19.33 No | ns |
| TNFa vs. Combo    | 500 pg/mL vs. 50 pg/mL  | -52 No    | ns |
| TNFa vs. Combo    | 500 pg/mL vs. 100 pg/mL | -11.67 No | ns |
| TNFa vs. Combo    | 500 pg/mL vs. 150 pg/mL | -33.83 No | ns |
| TNFa vs. Combo    | 500 pg/mL vs. 200 pg/mL | -41.83 No | ns |
| TNFa vs. Combo    | 500 pg/mL vs. 250 pg/mL | -52.33 No | ns |
| TNFa vs. Combo    | 500 pg/mL vs. 500 pg/mL | -61.67 No | ns |
| TNFa vs. Combo    | 500 pg/mL vs. 1 ng/mL   | -47.33 No | ns |
| TNFa vs. Combo    | 500 pg/mL vs. 2.5 ng/mL | -36.67 No | ns |
| TNFa vs. Combo    | 500 pg/mL vs. 5 ng/mL   | -23.67 No | ns |
| TNFa vs. TNFa     | 1 ng/mL vs. 2.5 ng/mL   | 15.67 No  | ns |
| TNFa vs. TNFa     | 1 ng/mL vs. 5 ng/mL     | 2 No      | ns |
| TNFa vs. Butyrate | 1 ng/mL vs. 50 µM       | -47.67 No | ns |
| TNFa vs. Butyrate | 1 ng/mL vs. 75 µM       | -49.33 No | ns |
| TNFa vs. Butyrate | 1 ng/mL vs. 100 µM      | -40.33 No | ns |
| TNFa vs. Butyrate | 1 ng/mL vs. 250 µM      | -17.33 No | ns |
| TNFa vs. Butyrate | 1 ng/mL vs. 500 µM      | -24.67 No | ns |
| TNFa vs. Butyrate | 1 ng/mL vs. 750 µM      | -34.67 No | ns |
| TNFa vs. Butyrate | 1 ng/mL vs. 1 mM        | -39.67 No | ns |
| TNFa vs. Butyrate | 1 ng/mL vs. 2.5 mM      | -45.67 No | ns |
| TNFa vs. Butyrate | 1 ng/mL vs. 5 mM        | -17 No    | ns |
| TNFa vs. Butyrate | 1 ng/mL vs. 7.5 mM      | -17.67 No | ns |
| TNFa vs. Combo    | 1 ng/mL vs. 50 pg/mL    | -50.33 No | ns |
| TNFa vs. Combo    | 1 ng/mL vs. 100 pg/mL   | -10 No    | ns |
| TNFa vs. Combo    | 1 ng/mL vs. 150 pg/mL   | -32.17 No | ns |
| TNFa vs. Combo    | 1 ng/mL vs. 200 pg/mL   | -40.17 No | ns |
| TNFa vs. Combo    | 1 ng/mL vs. 250 pg/mL   | -50.67 No | ns |
| TNFa vs. Combo    | 1 ng/mL vs. 500 pg/mL   | -60 No    | ns |
| TNFa vs. Combo    | 1 ng/mL vs. 1 ng/mL     | -45.67 No | ns |
| TNFa vs. Combo    | 1 ng/mL vs. 2.5 ng/mL   | -35 No    | ns |
| TNFa vs. Combo    | 1 ng/mL vs. 5 ng/mL     | -22 No    | ns |
| TNFa vs. TNFa     | 2.5 ng/mL vs. 5 ng/mL   | -13.67 No | ns |
| TNFa vs. Butyrate | 2.5 ng/mL vs. 50 µM     | -63.33 No | ns |
| TNFa vs. Butyrate | 2.5 ng/mL vs. 75 µM     | -65 No    | ns |
| TNFa vs. Butyrate | 2.5 ng/mL vs. 100 µM    | -56 No    | ns |
| TNFa vs. Butyrate | 2.5 ng/mL vs. 250 µM    | -33 No    | ns |
| TNFa vs. Butyrate | 2.5 ng/mL vs. 500 µM    | -40.33 No | ns |
| TNFa vs. Butyrate | 2.5 ng/mL vs. 750 µM    | -50.33 No | ns |
| TNFa vs. Butyrate | 2.5 ng/mL vs. 1 mM      | -55.33 No | ns |
| TNFa vs. Butyrate | 2.5 ng/mL vs. 2.5 mM    | -61.33 No | ns |

|                       |                         |        |    |    |
|-----------------------|-------------------------|--------|----|----|
| TNFa vs. Butyrate     | 2.5 ng/mL vs. 5 mM      | -32.67 | No | ns |
| TNFa vs. Butyrate     | 2.5 ng/mL vs. 7.5 mM    | -33.33 | No | ns |
| TNFa vs. Combo        | 2.5 ng/mL vs. 50 pg/mL  | -66    | No | ns |
| TNFa vs. Combo        | 2.5 ng/mL vs. 100 pg/mL | -25.67 | No | ns |
| TNFa vs. Combo        | 2.5 ng/mL vs. 150 pg/mL | -47.83 | No | ns |
| TNFa vs. Combo        | 2.5 ng/mL vs. 200 pg/mL | -55.83 | No | ns |
| TNFa vs. Combo        | 2.5 ng/mL vs. 250 pg/mL | -66.33 | No | ns |
| TNFa vs. Combo        | 2.5 ng/mL vs. 500 pg/mL | -75.67 | No | ns |
| TNFa vs. Combo        | 2.5 ng/mL vs. 1 ng/mL   | -61.33 | No | ns |
| TNFa vs. Combo        | 2.5 ng/mL vs. 2.5 ng/mL | -50.67 | No | ns |
| TNFa vs. Combo        | 2.5 ng/mL vs. 5 ng/mL   | -37.67 | No | ns |
| TNFa vs. Butyrate     | 5 ng/mL vs. 50 µM       | -49.67 | No | ns |
| TNFa vs. Butyrate     | 5 ng/mL vs. 75 µM       | -51.33 | No | ns |
| TNFa vs. Butyrate     | 5 ng/mL vs. 100 µM      | -42.33 | No | ns |
| TNFa vs. Butyrate     | 5 ng/mL vs. 250 µM      | -19.33 | No | ns |
| TNFa vs. Butyrate     | 5 ng/mL vs. 500 µM      | -26.67 | No | ns |
| TNFa vs. Butyrate     | 5 ng/mL vs. 750 µM      | -36.67 | No | ns |
| TNFa vs. Butyrate     | 5 ng/mL vs. 1 mM        | -41.67 | No | ns |
| TNFa vs. Butyrate     | 5 ng/mL vs. 2.5 mM      | -47.67 | No | ns |
| TNFa vs. Butyrate     | 5 ng/mL vs. 5 mM        | -19    | No | ns |
| TNFa vs. Butyrate     | 5 ng/mL vs. 7.5 mM      | -19.67 | No | ns |
| TNFa vs. Combo        | 5 ng/mL vs. 50 pg/mL    | -52.33 | No | ns |
| TNFa vs. Combo        | 5 ng/mL vs. 100 pg/mL   | -12    | No | ns |
| TNFa vs. Combo        | 5 ng/mL vs. 150 pg/mL   | -34.17 | No | ns |
| TNFa vs. Combo        | 5 ng/mL vs. 200 pg/mL   | -42.17 | No | ns |
| TNFa vs. Combo        | 5 ng/mL vs. 250 pg/mL   | -52.67 | No | ns |
| TNFa vs. Combo        | 5 ng/mL vs. 500 pg/mL   | -62    | No | ns |
| TNFa vs. Combo        | 5 ng/mL vs. 1 ng/mL     | -47.67 | No | ns |
| TNFa vs. Combo        | 5 ng/mL vs. 2.5 ng/mL   | -37    | No | ns |
| TNFa vs. Combo        | 5 ng/mL vs. 5 ng/mL     | -24    | No | ns |
| Butyrate vs. Butyrate | 50 µM vs. 75 µM         | -1.667 | No | ns |
| Butyrate vs. Butyrate | 50 µM vs. 100 µM        | 7.333  | No | ns |
| Butyrate vs. Butyrate | 50 µM vs. 250 µM        | 30.33  | No | ns |
| Butyrate vs. Butyrate | 50 µM vs. 500 µM        | 23     | No | ns |
| Butyrate vs. Butyrate | 50 µM vs. 750 µM        | 13     | No | ns |
| Butyrate vs. Butyrate | 50 µM vs. 1 mM          | 8      | No | ns |
| Butyrate vs. Butyrate | 50 µM vs. 2.5 mM        | 2      | No | ns |
| Butyrate vs. Butyrate | 50 µM vs. 5 mM          | 30.67  | No | ns |
| Butyrate vs. Butyrate | 50 µM vs. 7.5 mM        | 30     | No | ns |
| Butyrate vs. Combo    | 50 µM vs. 50 pg/mL      | -2.667 | No | ns |
| Butyrate vs. Combo    | 50 µM vs. 100 pg/mL     | 37.67  | No | ns |
| Butyrate vs. Combo    | 50 µM vs. 150 pg/mL     | 15.5   | No | ns |
| Butyrate vs. Combo    | 50 µM vs. 200 pg/mL     | 7.5    | No | ns |
| Butyrate vs. Combo    | 50 µM vs. 250 pg/mL     | -3     | No | ns |
| Butyrate vs. Combo    | 50 µM vs. 500 pg/mL     | -12.33 | No | ns |
| Butyrate vs. Combo    | 50 µM vs. 1 ng/mL       | 2      | No | ns |
| Butyrate vs. Combo    | 50 µM vs. 2.5 ng/mL     | 12.67  | No | ns |

|                       |                             |         |    |    |
|-----------------------|-----------------------------|---------|----|----|
| Butyrate vs. Combo    | 50 $\mu$ M vs. 5 ng/mL      | 25.67   | No | ns |
| Butyrate vs. Butyrate | 75 $\mu$ M vs. 100 $\mu$ M  | 9       | No | ns |
| Butyrate vs. Butyrate | 75 $\mu$ M vs. 250 $\mu$ M  | 32      | No | ns |
| Butyrate vs. Butyrate | 75 $\mu$ M vs. 500 $\mu$ M  | 24.67   | No | ns |
| Butyrate vs. Butyrate | 75 $\mu$ M vs. 750 $\mu$ M  | 14.67   | No | ns |
| Butyrate vs. Butyrate | 75 $\mu$ M vs. 1 mM         | 9.667   | No | ns |
| Butyrate vs. Butyrate | 75 $\mu$ M vs. 2.5 mM       | 3.667   | No | ns |
| Butyrate vs. Butyrate | 75 $\mu$ M vs. 5 mM         | 32.33   | No | ns |
| Butyrate vs. Butyrate | 75 $\mu$ M vs. 7.5 mM       | 31.67   | No | ns |
| Butyrate vs. Combo    | 75 $\mu$ M vs. 50 pg/mL     | -1      | No | ns |
| Butyrate vs. Combo    | 75 $\mu$ M vs. 100 pg/mL    | 39.33   | No | ns |
| Butyrate vs. Combo    | 75 $\mu$ M vs. 150 pg/mL    | 17.17   | No | ns |
| Butyrate vs. Combo    | 75 $\mu$ M vs. 200 pg/mL    | 9.167   | No | ns |
| Butyrate vs. Combo    | 75 $\mu$ M vs. 250 pg/mL    | -1.333  | No | ns |
| Butyrate vs. Combo    | 75 $\mu$ M vs. 500 pg/mL    | -10.67  | No | ns |
| Butyrate vs. Combo    | 75 $\mu$ M vs. 1 ng/mL      | 3.667   | No | ns |
| Butyrate vs. Combo    | 75 $\mu$ M vs. 2.5 ng/mL    | 14.33   | No | ns |
| Butyrate vs. Combo    | 75 $\mu$ M vs. 5 ng/mL      | 27.33   | No | ns |
| Butyrate vs. Butyrate | 100 $\mu$ M vs. 250 $\mu$ M | 23      | No | ns |
| Butyrate vs. Butyrate | 100 $\mu$ M vs. 500 $\mu$ M | 15.67   | No | ns |
| Butyrate vs. Butyrate | 100 $\mu$ M vs. 750 $\mu$ M | 5.667   | No | ns |
| Butyrate vs. Butyrate | 100 $\mu$ M vs. 1 mM        | 0.6667  | No | ns |
| Butyrate vs. Butyrate | 100 $\mu$ M vs. 2.5 mM      | -5.333  | No | ns |
| Butyrate vs. Butyrate | 100 $\mu$ M vs. 5 mM        | 23.33   | No | ns |
| Butyrate vs. Butyrate | 100 $\mu$ M vs. 7.5 mM      | 22.67   | No | ns |
| Butyrate vs. Combo    | 100 $\mu$ M vs. 50 pg/mL    | -10     | No | ns |
| Butyrate vs. Combo    | 100 $\mu$ M vs. 100 pg/mL   | 30.33   | No | ns |
| Butyrate vs. Combo    | 100 $\mu$ M vs. 150 pg/mL   | 8.167   | No | ns |
| Butyrate vs. Combo    | 100 $\mu$ M vs. 200 pg/mL   | 0.1667  | No | ns |
| Butyrate vs. Combo    | 100 $\mu$ M vs. 250 pg/mL   | -10.33  | No | ns |
| Butyrate vs. Combo    | 100 $\mu$ M vs. 500 pg/mL   | -19.67  | No | ns |
| Butyrate vs. Combo    | 100 $\mu$ M vs. 1 ng/mL     | -5.333  | No | ns |
| Butyrate vs. Combo    | 100 $\mu$ M vs. 2.5 ng/mL   | 5.333   | No | ns |
| Butyrate vs. Combo    | 100 $\mu$ M vs. 5 ng/mL     | 18.33   | No | ns |
| Butyrate vs. Butyrate | 250 $\mu$ M vs. 500 $\mu$ M | -7.333  | No | ns |
| Butyrate vs. Butyrate | 250 $\mu$ M vs. 750 $\mu$ M | -17.33  | No | ns |
| Butyrate vs. Butyrate | 250 $\mu$ M vs. 1 mM        | -22.33  | No | ns |
| Butyrate vs. Butyrate | 250 $\mu$ M vs. 2.5 mM      | -28.33  | No | ns |
| Butyrate vs. Butyrate | 250 $\mu$ M vs. 5 mM        | 0.3333  | No | ns |
| Butyrate vs. Butyrate | 250 $\mu$ M vs. 7.5 mM      | -0.3333 | No | ns |
| Butyrate vs. Combo    | 250 $\mu$ M vs. 50 pg/mL    | -33     | No | ns |
| Butyrate vs. Combo    | 250 $\mu$ M vs. 100 pg/mL   | 7.333   | No | ns |
| Butyrate vs. Combo    | 250 $\mu$ M vs. 150 pg/mL   | -14.83  | No | ns |
| Butyrate vs. Combo    | 250 $\mu$ M vs. 200 pg/mL   | -22.83  | No | ns |
| Butyrate vs. Combo    | 250 $\mu$ M vs. 250 pg/mL   | -33.33  | No | ns |
| Butyrate vs. Combo    | 250 $\mu$ M vs. 500 pg/mL   | -42.67  | No | ns |
| Butyrate vs. Combo    | 250 $\mu$ M vs. 1 ng/mL     | -28.33  | No | ns |

|                       |                             |            |    |
|-----------------------|-----------------------------|------------|----|
| Butyrate vs. Combo    | 250 $\mu$ M vs. 2.5 ng/mL   | -17.67 No  | ns |
| Butyrate vs. Combo    | 250 $\mu$ M vs. 5 ng/mL     | -4.667 No  | ns |
| Butyrate vs. Butyrate | 500 $\mu$ M vs. 750 $\mu$ M | -10 No     | ns |
| Butyrate vs. Butyrate | 500 $\mu$ M vs. 1 mM        | -15 No     | ns |
| Butyrate vs. Butyrate | 500 $\mu$ M vs. 2.5 mM      | -21 No     | ns |
| Butyrate vs. Butyrate | 500 $\mu$ M vs. 5 mM        | 7.667 No   | ns |
| Butyrate vs. Butyrate | 500 $\mu$ M vs. 7.5 mM      | 7 No       | ns |
| Butyrate vs. Combo    | 500 $\mu$ M vs. 50 pg/mL    | -25.67 No  | ns |
| Butyrate vs. Combo    | 500 $\mu$ M vs. 100 pg/mL   | 14.67 No   | ns |
| Butyrate vs. Combo    | 500 $\mu$ M vs. 150 pg/mL   | -7.5 No    | ns |
| Butyrate vs. Combo    | 500 $\mu$ M vs. 200 pg/mL   | -15.5 No   | ns |
| Butyrate vs. Combo    | 500 $\mu$ M vs. 250 pg/mL   | -26 No     | ns |
| Butyrate vs. Combo    | 500 $\mu$ M vs. 500 pg/mL   | -35.33 No  | ns |
| Butyrate vs. Combo    | 500 $\mu$ M vs. 1 ng/mL     | -21 No     | ns |
| Butyrate vs. Combo    | 500 $\mu$ M vs. 2.5 ng/mL   | -10.33 No  | ns |
| Butyrate vs. Combo    | 500 $\mu$ M vs. 5 ng/mL     | 2.667 No   | ns |
| Butyrate vs. Butyrate | 750 $\mu$ M vs. 1 mM        | -5 No      | ns |
| Butyrate vs. Butyrate | 750 $\mu$ M vs. 2.5 mM      | -11 No     | ns |
| Butyrate vs. Butyrate | 750 $\mu$ M vs. 5 mM        | 17.67 No   | ns |
| Butyrate vs. Butyrate | 750 $\mu$ M vs. 7.5 mM      | 17 No      | ns |
| Butyrate vs. Combo    | 750 $\mu$ M vs. 50 pg/mL    | -15.67 No  | ns |
| Butyrate vs. Combo    | 750 $\mu$ M vs. 100 pg/mL   | 24.67 No   | ns |
| Butyrate vs. Combo    | 750 $\mu$ M vs. 150 pg/mL   | 2.5 No     | ns |
| Butyrate vs. Combo    | 750 $\mu$ M vs. 200 pg/mL   | -5.5 No    | ns |
| Butyrate vs. Combo    | 750 $\mu$ M vs. 250 pg/mL   | -16 No     | ns |
| Butyrate vs. Combo    | 750 $\mu$ M vs. 500 pg/mL   | -25.33 No  | ns |
| Butyrate vs. Combo    | 750 $\mu$ M vs. 1 ng/mL     | -11 No     | ns |
| Butyrate vs. Combo    | 750 $\mu$ M vs. 2.5 ng/mL   | -0.3333 No | ns |
| Butyrate vs. Combo    | 750 $\mu$ M vs. 5 ng/mL     | 12.67 No   | ns |
| Butyrate vs. Butyrate | 1 mM vs. 2.5 mM             | -6 No      | ns |
| Butyrate vs. Butyrate | 1 mM vs. 5 mM               | 22.67 No   | ns |
| Butyrate vs. Butyrate | 1 mM vs. 7.5 mM             | 22 No      | ns |
| Butyrate vs. Combo    | 1 mM vs. 50 pg/mL           | -10.67 No  | ns |
| Butyrate vs. Combo    | 1 mM vs. 100 pg/mL          | 29.67 No   | ns |
| Butyrate vs. Combo    | 1 mM vs. 150 pg/mL          | 7.5 No     | ns |
| Butyrate vs. Combo    | 1 mM vs. 200 pg/mL          | -0.5 No    | ns |
| Butyrate vs. Combo    | 1 mM vs. 250 pg/mL          | -11 No     | ns |
| Butyrate vs. Combo    | 1 mM vs. 500 pg/mL          | -20.33 No  | ns |
| Butyrate vs. Combo    | 1 mM vs. 1 ng/mL            | -6 No      | ns |
| Butyrate vs. Combo    | 1 mM vs. 2.5 ng/mL          | 4.667 No   | ns |
| Butyrate vs. Combo    | 1 mM vs. 5 ng/mL            | 17.67 No   | ns |
| Butyrate vs. Butyrate | 2.5 mM vs. 5 mM             | 28.67 No   | ns |
| Butyrate vs. Butyrate | 2.5 mM vs. 7.5 mM           | 28 No      | ns |
| Butyrate vs. Combo    | 2.5 mM vs. 50 pg/mL         | -4.667 No  | ns |
| Butyrate vs. Combo    | 2.5 mM vs. 100 pg/mL        | 35.67 No   | ns |
| Butyrate vs. Combo    | 2.5 mM vs. 150 pg/mL        | 13.5 No    | ns |
| Butyrate vs. Combo    | 2.5 mM vs. 200 pg/mL        | 5.5 No     | ns |

|                       |                         |            |    |
|-----------------------|-------------------------|------------|----|
| Butyrate vs. Combo    | 2.5 mM vs. 250 pg/mL    | -5 No      | ns |
| Butyrate vs. Combo    | 2.5 mM vs. 500 pg/mL    | -14.33 No  | ns |
| Butyrate vs. Combo    | 2.5 mM vs. 1 ng/mL      | 0 No       | ns |
| Butyrate vs. Combo    | 2.5 mM vs. 2.5 ng/mL    | 10.67 No   | ns |
| Butyrate vs. Combo    | 2.5 mM vs. 5 ng/mL      | 23.67 No   | ns |
| Butyrate vs. Butyrate | 5 mM vs. 7.5 mM         | -0.6667 No | ns |
| Butyrate vs. Combo    | 5 mM vs. 50 pg/mL       | -33.33 No  | ns |
| Butyrate vs. Combo    | 5 mM vs. 100 pg/mL      | 7 No       | ns |
| Butyrate vs. Combo    | 5 mM vs. 150 pg/mL      | -15.17 No  | ns |
| Butyrate vs. Combo    | 5 mM vs. 200 pg/mL      | -23.17 No  | ns |
| Butyrate vs. Combo    | 5 mM vs. 250 pg/mL      | -33.67 No  | ns |
| Butyrate vs. Combo    | 5 mM vs. 500 pg/mL      | -43 No     | ns |
| Butyrate vs. Combo    | 5 mM vs. 1 ng/mL        | -28.67 No  | ns |
| Butyrate vs. Combo    | 5 mM vs. 2.5 ng/mL      | -18 No     | ns |
| Butyrate vs. Combo    | 5 mM vs. 5 ng/mL        | -5 No      | ns |
| Butyrate vs. Combo    | 7.5 mM vs. 50 pg/mL     | -32.67 No  | ns |
| Butyrate vs. Combo    | 7.5 mM vs. 100 pg/mL    | 7.667 No   | ns |
| Butyrate vs. Combo    | 7.5 mM vs. 150 pg/mL    | -14.5 No   | ns |
| Butyrate vs. Combo    | 7.5 mM vs. 200 pg/mL    | -22.5 No   | ns |
| Butyrate vs. Combo    | 7.5 mM vs. 250 pg/mL    | -33 No     | ns |
| Butyrate vs. Combo    | 7.5 mM vs. 500 pg/mL    | -42.33 No  | ns |
| Butyrate vs. Combo    | 7.5 mM vs. 1 ng/mL      | -28 No     | ns |
| Butyrate vs. Combo    | 7.5 mM vs. 2.5 ng/mL    | -17.33 No  | ns |
| Butyrate vs. Combo    | 7.5 mM vs. 5 ng/mL      | -4.333 No  | ns |
| Combo vs. Combo       | 50 pg/mL vs. 100 pg/mL  | 40.33 No   | ns |
| Combo vs. Combo       | 50 pg/mL vs. 150 pg/mL  | 18.17 No   | ns |
| Combo vs. Combo       | 50 pg/mL vs. 200 pg/mL  | 10.17 No   | ns |
| Combo vs. Combo       | 50 pg/mL vs. 250 pg/mL  | -0.3333 No | ns |
| Combo vs. Combo       | 50 pg/mL vs. 500 pg/mL  | -9.667 No  | ns |
| Combo vs. Combo       | 50 pg/mL vs. 1 ng/mL    | 4.667 No   | ns |
| Combo vs. Combo       | 50 pg/mL vs. 2.5 ng/mL  | 15.33 No   | ns |
| Combo vs. Combo       | 50 pg/mL vs. 5 ng/mL    | 28.33 No   | ns |
| Combo vs. Combo       | 100 pg/mL vs. 150 pg/mL | -22.17 No  | ns |
| Combo vs. Combo       | 100 pg/mL vs. 200 pg/mL | -30.17 No  | ns |
| Combo vs. Combo       | 100 pg/mL vs. 250 pg/mL | -40.67 No  | ns |
| Combo vs. Combo       | 100 pg/mL vs. 500 pg/mL | -50 No     | ns |
| Combo vs. Combo       | 100 pg/mL vs. 1 ng/mL   | -35.67 No  | ns |
| Combo vs. Combo       | 100 pg/mL vs. 2.5 ng/mL | -25 No     | ns |
| Combo vs. Combo       | 100 pg/mL vs. 5 ng/mL   | -12 No     | ns |
| Combo vs. Combo       | 150 pg/mL vs. 200 pg/mL | -8 No      | ns |
| Combo vs. Combo       | 150 pg/mL vs. 250 pg/mL | -18.5 No   | ns |
| Combo vs. Combo       | 150 pg/mL vs. 500 pg/mL | -27.83 No  | ns |
| Combo vs. Combo       | 150 pg/mL vs. 1 ng/mL   | -13.5 No   | ns |
| Combo vs. Combo       | 150 pg/mL vs. 2.5 ng/mL | -2.833 No  | ns |
| Combo vs. Combo       | 150 pg/mL vs. 5 ng/mL   | 10.17 No   | ns |
| Combo vs. Combo       | 200 pg/mL vs. 250 pg/mL | -10.5 No   | ns |
| Combo vs. Combo       | 200 pg/mL vs. 500 pg/mL | -19.83 No  | ns |

|                 |                         |           |    |
|-----------------|-------------------------|-----------|----|
| Combo vs. Combo | 200 pg/mL vs. 1 ng/mL   | -5.5 No   | ns |
| Combo vs. Combo | 200 pg/mL vs. 2.5 ng/mL | 5.167 No  | ns |
| Combo vs. Combo | 200 pg/mL vs. 5 ng/mL   | 18.17 No  | ns |
| Combo vs. Combo | 250 pg/mL vs. 500 pg/mL | -9.333 No | ns |
| Combo vs. Combo | 250 pg/mL vs. 1 ng/mL   | 5 No      | ns |
| Combo vs. Combo | 250 pg/mL vs. 2.5 ng/mL | 15.67 No  | ns |
| Combo vs. Combo | 250 pg/mL vs. 5 ng/mL   | 28.67 No  | ns |
| Combo vs. Combo | 500 pg/mL vs. 1 ng/mL   | 14.33 No  | ns |
| Combo vs. Combo | 500 pg/mL vs. 2.5 ng/mL | 25 No     | ns |
| Combo vs. Combo | 500 pg/mL vs. 5 ng/mL   | 38 No     | ns |
| Combo vs. Combo | 1 ng/mL vs. 2.5 ng/mL   | 10.67 No  | ns |
| Combo vs. Combo | 1 ng/mL vs. 5 ng/mL     | 23.67 No  | ns |
| Combo vs. Combo | 2.5 ng/mL vs. 5 ng/mL   |           |    |

A-B  
A-C  
A-D  
A-E  
A-F  
A-G  
A-H  
A-I  
A-J  
A-K  
A-L  
A-M  
A-N  
A-O  
A-P  
A-Q  
A-R  
A-S  
A-T  
A-U  
A-V  
A-W  
A-X  
A-Y  
A-Z  
A-AA  
A-AB  
A-AC  
A-AD  
B-C  
B-D  
B-E  
B-F  
B-G  
B-H  
B-I  
B-J  
B-K  
B-L  
B-M  
B-N  
B-O  
B-P  
B-Q  
B-R  
B-S

B-T  
B-U  
B-V  
B-W  
B-X  
B-Y  
B-Z  
B-AA  
B-AB  
B-AC  
B-AD  
C-D  
C-E  
C-F  
C-G  
C-H  
C-I  
C-J  
C-K  
C-L  
C-M  
C-N  
C-O  
C-P  
C-Q  
C-R  
C-S  
C-T  
C-U  
C-V  
C-W  
C-X  
C-Y  
C-Z  
C-AA  
C-AB  
C-AC  
C-AD  
D-E  
D-F  
D-G  
D-H  
D-I  
D-J  
D-K  
D-L  
D-M

D-N  
D-O  
D-P  
D-Q  
D-R  
D-S  
D-T  
D-U

D-V  
D-W  
D-X  
D-Y  
D-Z  
D-AA  
D-AB  
D-AC  
D-AD

E-F  
E-G  
E-H  
E-I  
E-J  
E-K  
E-L  
E-M  
E-N  
E-O  
E-P  
E-Q  
E-R  
E-S  
E-T  
E-U

E-V  
E-W  
E-X  
E-Y  
E-Z  
E-AA  
E-AB  
E-AC  
E-AD

F-G  
F-H  
F-I  
F-J  
F-K

F-L

F-M

F-N

F-O

F-P

F-Q

F-R

F-S

F-T

F-U

F-V

F-W

F-X

F-Y

F-Z

F-AA

F-AB

F-AC

F-AD

G-H

G-I

G-J

G-K

G-L

G-M

G-N

G-O

G-P

G-Q

G-R

G-S

G-T

G-U

G-V

G-W

G-X

G-Y

G-Z

G-AA

G-AB

G-AC

G-AD

H-I

H-J

H-K

H-L

H-M

H-N  
H-O  
H-P  
H-Q  
H-R  
H-S  
H-T  
H-U

H-V  
H-W  
H-X  
H-Y  
H-Z  
H-AA  
H-AB  
H-AC  
H-AD

I-J  
I-K  
I-L  
I-M  
I-N  
I-O  
I-P  
I-Q  
I-R  
I-S  
I-T  
I-U

I-V  
I-W  
I-X  
I-Y  
I-Z  
I-AA  
I-AB  
I-AC  
I-AD

J-K  
J-L  
J-M  
J-N  
J-O  
J-P  
J-Q  
J-R  
J-S

J-T

J-U

J-V

J-W

J-X

J-Y

J-Z

J-AA

J-AB

J-AC

J-AD

K-L

K-M

K-N

K-O

K-P

K-Q

K-R

K-S

K-T

K-U

K-V

K-W

K-X

K-Y

K-Z

K-AA

K-AB

K-AC

K-AD

L-M

L-N

L-O

L-P

L-Q

L-R

L-S

L-T

L-U

L-V

L-W

L-X

L-Y

L-Z

L-AA

L-AB

L-AC

L-AD  
M-N  
M-O  
M-P  
M-Q  
M-R  
M-S  
M-T  
M-U  
M-V  
M-W  
M-X  
M-Y  
M-Z  
M-AA  
M-AB  
M-AC  
M-AD  
N-O  
N-P  
N-Q  
N-R  
N-S  
N-T  
N-U  
N-V  
N-W  
N-X  
N-Y  
N-Z  
N-AA  
N-AB  
N-AC  
N-AD  
O-P  
O-Q  
O-R  
O-S  
O-T  
O-U  
O-V  
O-W  
O-X  
O-Y  
O-Z  
O-AA  
O-AB

O-AC  
O-AD  
P-Q  
P-R  
P-S  
P-T  
P-U  
P-V  
P-W  
P-X  
P-Y  
P-Z  
P-AA  
P-AB  
P-AC  
P-AD  
Q-R  
Q-S  
Q-T  
Q-U  
Q-V  
Q-W  
Q-X  
Q-Y  
Q-Z  
Q-AA  
Q-AB  
Q-AC  
Q-AD  
R-S  
R-T  
R-U  
R-V  
R-W  
R-X  
R-Y  
R-Z  
R-AA  
R-AB  
R-AC  
R-AD  
S-T  
S-U  
S-V  
S-W  
S-X  
S-Y

S-Z  
S-AA  
S-AB  
S-AC  
S-AD  
T-U  
T-V  
T-W  
T-X  
T-Y  
T-Z  
T-AA  
T-AB  
T-AC  
T-AD  
U-V  
U-W  
U-X  
U-Y  
U-Z  
U-AA  
U-AB  
U-AC  
U-AD  
V-W  
V-X  
V-Y  
V-Z  
V-AA  
V-AB  
V-AC  
V-AD  
W-X  
W-Y  
W-Z  
W-AA  
W-AB  
W-AC  
W-AD  
X-Y  
X-Z  
X-AA  
X-AB  
X-AC  
X-AD  
Y-Z  
Y-AA

Y-AB  
Y-AC  
Y-AD  
Z-AA  
Z-AB  
Z-AC  
Z-AD  
AA-AB  
AA-AC  
AA-AD  
AB-AC  
AB-AD

| Treatment             | Dunn's multiple comparisons test | Mean rank | Significant' | Summary | Adjusted P |
|-----------------------|----------------------------------|-----------|--------------|---------|------------|
| Media vs. FCCP        | Media vs. 8µM FCCP               | 35.83     | No           | ns      | >0.9999    |
| Media Vs. Butyrate    | Media vs. 10µM                   | 35.5      | No           | ns      | >0.9999    |
| Media Vs. Butyrate    | Media vs. 25µM                   | -7.5      | No           | ns      | >0.9999    |
| Media Vs. Butyrate    | Media vs. 50µM                   | -26.5     | No           | ns      | >0.9999    |
| Media Vs. Butyrate    | Media vs. 100µM                  | -52.33    | No           | ns      | >0.9999    |
| Media Vs. Butyrate    | Media vs. 250µM                  | -71.67    | No           | ns      | 0.4464     |
| Media Vs. Butyrate    | Media vs. 500µM                  | -38.17    | No           | ns      | >0.9999    |
| Media vs. TNFa        | Media vs. 10pg/mL                | 6         | No           | ns      | >0.9999    |
| Media vs. TNFa        | Media vs. 25pg/mL                | 30.83     | No           | ns      | >0.9999    |
| Media vs. TNFa        | Media vs. 50pg/mL                | -10.5     | No           | ns      | >0.9999    |
| Media vs. TNFa        | Media vs. 100pg/mL               | 1.5       | No           | ns      | >0.9999    |
| Media vs. TNFa        | Media vs. 250pg/mL               | -13.33    | No           | ns      | >0.9999    |
| Media vs. Combo       | Media vs. 10pg/mL                | 16.17     | No           | ns      | >0.9999    |
| Media vs. Combo       | Media vs. 25pg/mL                | 29.33     | No           | ns      | >0.9999    |
| Media vs. Combo       | Media vs. 50pg/mL                | -4.5      | No           | ns      | >0.9999    |
| Media vs. Combo       | Media vs. 100pg/mL               | -35.33    | No           | ns      | >0.9999    |
| Media vs. Combo       | Media vs. 250pg/mL               | -3.833    | No           | ns      | >0.9999    |
| Media vs. Combo       | Media vs. 10pg/mL                | -65       | No           | ns      | >0.9999    |
| Media vs. Combo       | Media vs. 25pg/mL                | -64.33    | No           | ns      | >0.9999    |
| Media vs. Combo       | Media vs. 50pg/mL                | -44.83    | No           | ns      | >0.9999    |
| Media vs. Combo       | Media vs. 100pg/mL               | -42.73    | No           | ns      | >0.9999    |
| Media vs. Combo       | Media vs. 250pg/mL               | -9        | No           | ns      | >0.9999    |
| FCCP vs. FCCP         | 8µM FCCP vs. 10µM                | -0.3333   | No           | ns      | >0.9999    |
| FCCP Vs. Butyrate     | 8µM FCCP vs. 25µM                | -43.33    | No           | ns      | >0.9999    |
| FCCP Vs. Butyrate     | 8µM FCCP vs. 50µM                | -62.33    | No           | ns      | >0.9999    |
| FCCP Vs. Butyrate     | 8µM FCCP vs. 100µM               | -88.17    | Yes          | *       | 0.0302     |
| FCCP Vs. Butyrate     | 8µM FCCP vs. 250µM               | -107.5    | Yes          | ***     | 0.0007     |
| FCCP Vs. Butyrate     | 8µM FCCP vs. 500µM               | -74       | No           | ns      | 0.3142     |
| FCCP Vs. Butyrate     | 8µM FCCP vs. 10pg/mL             | -29.83    | No           | ns      | >0.9999    |
| FCCP vs. TNFa         | 8µM FCCP vs. 25pg/mL             | -5        | No           | ns      | >0.9999    |
| FCCP vs. TNFa         | 8µM FCCP vs. 50pg/mL             | -46.33    | No           | ns      | >0.9999    |
| FCCP vs. TNFa         | 8µM FCCP vs. 100pg/mL            | -34.33    | No           | ns      | >0.9999    |
| FCCP vs. TNFa         | 8µM FCCP vs. 250pg/mL            | -49.17    | No           | ns      | >0.9999    |
| FCCP vs. TNFa         | 8µM FCCP vs. 10pg/mL             | -19.67    | No           | ns      | >0.9999    |
| FCCP vs. Combo        | 8µM FCCP vs. 25pg/mL             | -6.5      | No           | ns      | >0.9999    |
| FCCP vs. Combo        | 8µM FCCP vs. 50pg/mL             | -40.33    | No           | ns      | >0.9999    |
| FCCP vs. Combo        | 8µM FCCP vs. 100pg/mL            | -71.17    | No           | ns      | 0.4806     |
| FCCP vs. Combo        | 8µM FCCP vs. 250pg/mL            | -39.67    | No           | ns      | >0.9999    |
| FCCP vs. Combo        | 8µM FCCP vs. 10pg/mL             | -100.8    | Yes          | **      | 0.0027     |
| FCCP vs. Combo        | 8µM FCCP vs. 25pg/mL             | -100.2    | Yes          | **      | 0.0031     |
| FCCP vs. Combo        | 8µM FCCP vs. 50pg/mL             | -80.67    | No           | ns      | 0.1092     |
| FCCP vs. Combo        | 8µM FCCP vs. 100pg/mL            | -78.57    | No           | ns      | 0.2732     |
| FCCP vs. Combo        | 8µM FCCP vs. 250pg/mL            | -44.83    | No           | ns      | >0.9999    |
| Butyrate vs. Butyrate | 10µM vs. 25µM                    | -43       | No           | ns      | >0.9999    |
| Butyrate vs. Butyrate | 10µM vs. 50µM                    | -62       | No           | ns      | >0.9999    |
| Butyrate vs. Butyrate | 10µM vs. 100µM                   | -87.83    | Yes          | *       | 0.0321     |

|                       |                   |            |     |         |
|-----------------------|-------------------|------------|-----|---------|
| Butyrate vs. Butyrate | 10μM vs. 250μM    | -107.2 Yes | *** | 0.0007  |
| Butyrate vs. Butyrate | 10μM vs. 500μM    | -73.67 No  | ns  | 0.3305  |
| Butyrate vs. TNFa     | 10μM vs. 10pg/mL  | -29.5 No   | ns  | >0.9999 |
| Butyrate vs. TNFa     | 10μM vs. 25pg/mL  | -4.667 No  | ns  | >0.9999 |
| Butyrate vs. TNFa     | 10μM vs. 50pg/mL  | -46 No     | ns  | >0.9999 |
| Butyrate vs. TNFa     | 10μM vs. 100pg/mL | -34 No     | ns  | >0.9999 |
| Butyrate vs. TNFa     | 10μM vs. 250pg/mL | -48.83 No  | ns  | >0.9999 |
| Butyrate vs. Combo    | 10μM vs. 10pg/mL  | -19.33 No  | ns  | >0.9999 |
| Butyrate vs. Combo    | 10μM vs. 25pg/mL  | -6.167 No  | ns  | >0.9999 |
| Butyrate vs. Combo    | 10μM vs. 50pg/mL  | -40 No     | ns  | >0.9999 |
| Butyrate vs. Combo    | 10μM vs. 100pg/mL | -70.83 No  | ns  | 0.5048  |
| Butyrate vs. Combo    | 10μM vs. 250pg/mL | -39.33 No  | ns  | >0.9999 |
| Butyrate vs. Combo    | 10μM vs. 10pg/mL  | -100.5 Yes | **  | 0.0029  |
| Butyrate vs. Combo    | 10μM vs. 25pg/mL  | -99.83 Yes | **  | 0.0033  |
| Butyrate vs. Combo    | 10μM vs. 50pg/mL  | -80.33 No  | ns  | 0.1153  |
| Butyrate vs. Combo    | 10μM vs. 100pg/mL | -78.23 No  | ns  | 0.2869  |
| Butyrate vs. Combo    | 10μM vs. 250pg/mL | -44.5 No   | ns  | >0.9999 |
| Butyrate vs. Butyrate | 25μM vs. 50μM     | -19 No     | ns  | >0.9999 |
| Butyrate vs. Butyrate | 25μM vs. 100μM    | -44.83 No  | ns  | >0.9999 |
| Butyrate vs. Butyrate | 25μM vs. 250μM    | -64.17 No  | ns  | >0.9999 |
| Butyrate vs. Butyrate | 25μM vs. 500μM    | -30.67 No  | ns  | >0.9999 |
| Butyrate vs. TNFa     | 25μM vs. 10pg/mL  | 13.5 No    | ns  | >0.9999 |
| Butyrate vs. TNFa     | 25μM vs. 25pg/mL  | 38.33 No   | ns  | >0.9999 |
| Butyrate vs. TNFa     | 25μM vs. 50pg/mL  | -3 No      | ns  | >0.9999 |
| Butyrate vs. TNFa     | 25μM vs. 100pg/mL | 9 No       | ns  | >0.9999 |
| Butyrate vs. TNFa     | 25μM vs. 250pg/mL | -5.833 No  | ns  | >0.9999 |
| Butyrate vs. Combo    | 25μM vs. 10pg/mL  | 23.67 No   | ns  | >0.9999 |
| Butyrate vs. Combo    | 25μM vs. 25pg/mL  | 36.83 No   | ns  | >0.9999 |
| Butyrate vs. Combo    | 25μM vs. 50pg/mL  | 3 No       | ns  | >0.9999 |
| Butyrate vs. Combo    | 25μM vs. 100pg/mL | -27.83 No  | ns  | >0.9999 |
| Butyrate vs. Combo    | 25μM vs. 250pg/mL | 3.667 No   | ns  | >0.9999 |
| Butyrate vs. Combo    | 25μM vs. 10pg/mL  | -57.5 No   | ns  | >0.9999 |
| Butyrate vs. Combo    | 25μM vs. 25pg/mL  | -56.83 No  | ns  | >0.9999 |
| Butyrate vs. Combo    | 25μM vs. 50pg/mL  | -37.33 No  | ns  | >0.9999 |
| Butyrate vs. Combo    | 25μM vs. 100pg/mL | -35.23 No  | ns  | >0.9999 |
| Butyrate vs. Combo    | 25μM vs. 250pg/mL | -1.5 No    | ns  | >0.9999 |
| Butyrate vs. Butyrate | 50μM vs. 100μM    | -25.83 No  | ns  | >0.9999 |
| Butyrate vs. Butyrate | 50μM vs. 250μM    | -45.17 No  | ns  | >0.9999 |
| Butyrate vs. Butyrate | 50μM vs. 500μM    | -11.67 No  | ns  | >0.9999 |
| Butyrate vs. TNFa     | 50μM vs. 10pg/mL  | 32.5 No    | ns  | >0.9999 |
| Butyrate vs. TNFa     | 50μM vs. 25pg/mL  | 57.33 No   | ns  | >0.9999 |
| Butyrate vs. TNFa     | 50μM vs. 50pg/mL  | 16 No      | ns  | >0.9999 |
| Butyrate vs. TNFa     | 50μM vs. 100pg/mL | 28 No      | ns  | >0.9999 |
| Butyrate vs. TNFa     | 50μM vs. 250pg/mL | 13.17 No   | ns  | >0.9999 |
| Butyrate vs. Combo    | 50μM vs. 10pg/mL  | 42.67 No   | ns  | >0.9999 |
| Butyrate vs. Combo    | 50μM vs. 25pg/mL  | 55.83 No   | ns  | >0.9999 |
| Butyrate vs. Combo    | 50μM vs. 50pg/mL  | 22 No      | ns  | >0.9999 |

|                       |                    |           |    |         |
|-----------------------|--------------------|-----------|----|---------|
| Butyrate vs. Combo    | 50µM vs. 100pg/mL  | -8.833 No | ns | >0.9999 |
| Butyrate vs. Combo    | 50µM vs. 250pg/mL  | 22.67 No  | ns | >0.9999 |
| Butyrate vs. Combo    | 50µM vs. 10pg/mL   | -38.5 No  | ns | >0.9999 |
| Butyrate vs. Combo    | 50µM vs. 25pg/mL   | -37.83 No | ns | >0.9999 |
| Butyrate vs. Combo    | 50µM vs. 50pg/mL   | -18.33 No | ns | >0.9999 |
| Butyrate vs. Combo    | 50µM vs. 100pg/mL  | -16.23 No | ns | >0.9999 |
| Butyrate vs. Combo    | 50µM vs. 250pg/mL  | 17.5 No   | ns | >0.9999 |
| Butyrate vs. Butyrate | 100µM vs. 250µM    | -19.33 No | ns | >0.9999 |
| Butyrate vs. Butyrate | 100µM vs. 500µM    | 14.17 No  | ns | >0.9999 |
| Butyrate vs. TNFa     | 100µM vs. 10pg/mL  | 58.33 No  | ns | >0.9999 |
| Butyrate vs. TNFa     | 100µM vs. 25pg/mL  | 83.17 No  | ns | 0.072   |
| Butyrate vs. TNFa     | 100µM vs. 50pg/mL  | 41.83 No  | ns | >0.9999 |
| Butyrate vs. TNFa     | 100µM vs. 100pg/mL | 53.83 No  | ns | >0.9999 |
| Butyrate vs. TNFa     | 100µM vs. 250pg/mL | 39 No     | ns | >0.9999 |
| Butyrate vs. Combo    | 100µM vs. 10pg/mL  | 68.5 No   | ns | 0.7079  |
| Butyrate vs. Combo    | 100µM vs. 25pg/mL  | 81.67 No  | ns | 0.0925  |
| Butyrate vs. Combo    | 100µM vs. 50pg/mL  | 47.83 No  | ns | >0.9999 |
| Butyrate vs. Combo    | 100µM vs. 100pg/mL | 17 No     | ns | >0.9999 |
| Butyrate vs. Combo    | 100µM vs. 250pg/mL | 48.5 No   | ns | >0.9999 |
| Butyrate vs. Combo    | 100µM vs. 10pg/mL  | -12.67 No | ns | >0.9999 |
| Butyrate vs. Combo    | 100µM vs. 25pg/mL  | -12 No    | ns | >0.9999 |
| Butyrate vs. Combo    | 100µM vs. 50pg/mL  | 7.5 No    | ns | >0.9999 |
| Butyrate vs. Combo    | 100µM vs. 100pg/mL | 9.6 No    | ns | >0.9999 |
| Butyrate vs. Combo    | 100µM vs. 250pg/mL | 43.33 No  | ns | >0.9999 |
| Butyrate vs. Butyrate | 250µM vs. 500µM    | 33.5 No   | ns | >0.9999 |
| Butyrate vs. TNFa     | 250µM vs. 10pg/mL  | 77.67 No  | ns | 0.1774  |
| Butyrate vs. TNFa     | 250µM vs. 25pg/mL  | 102.5 Yes | ** | 0.002   |
| Butyrate vs. TNFa     | 250µM vs. 50pg/mL  | 61.17 No  | ns | >0.9999 |
| Butyrate vs. TNFa     | 250µM vs. 100pg/mL | 73.17 No  | ns | 0.3565  |
| Butyrate vs. TNFa     | 250µM vs. 250pg/mL | 58.33 No  | ns | >0.9999 |
| Butyrate vs. Combo    | 250µM vs. 10pg/mL  | 87.83 Yes | *  | 0.0321  |
| Butyrate vs. Combo    | 250µM vs. 25pg/mL  | 101 Yes   | ** | 0.0026  |
| Butyrate vs. Combo    | 250µM vs. 50pg/mL  | 67.17 No  | ns | 0.855   |
| Butyrate vs. Combo    | 250µM vs. 100pg/mL | 36.33 No  | ns | >0.9999 |
| Butyrate vs. Combo    | 250µM vs. 250pg/mL | 67.83 No  | ns | 0.7783  |
| Butyrate vs. Combo    | 250µM vs. 10pg/mL  | 6.667 No  | ns | >0.9999 |
| Butyrate vs. Combo    | 250µM vs. 25pg/mL  | 7.333 No  | ns | >0.9999 |
| Butyrate vs. Combo    | 250µM vs. 50pg/mL  | 26.83 No  | ns | >0.9999 |
| Butyrate vs. Combo    | 250µM vs. 100pg/mL | 28.93 No  | ns | >0.9999 |
| Butyrate vs. Combo    | 250µM vs. 250pg/mL | 62.67 No  | ns | >0.9999 |
| Butyrate vs. TNFa     | 500µM vs. 10pg/mL  | 44.17 No  | ns | >0.9999 |
| Butyrate vs. TNFa     | 500µM vs. 25pg/mL  | 69 No     | ns | 0.6589  |
| Butyrate vs. TNFa     | 500µM vs. 50pg/mL  | 27.67 No  | ns | >0.9999 |
| Butyrate vs. TNFa     | 500µM vs. 100pg/mL | 39.67 No  | ns | >0.9999 |
| Butyrate vs. TNFa     | 500µM vs. 250pg/mL | 24.83 No  | ns | >0.9999 |
| Butyrate vs. Combo    | 500µM vs. 10pg/mL  | 54.33 No  | ns | >0.9999 |
| Butyrate vs. Combo    | 500µM vs. 25pg/mL  | 67.5 No   | ns | 0.8158  |

|                    |                      |        |     |    |         |
|--------------------|----------------------|--------|-----|----|---------|
| Butyrate vs. Combo | 500µM vs. 50pg/mL    | 33.67  | No  | ns | >0.9999 |
| Butyrate vs. Combo | 500µM vs. 100pg/mL   | 2.833  | No  | ns | >0.9999 |
| Butyrate vs. Combo | 500µM vs. 250pg/mL   | 34.33  | No  | ns | >0.9999 |
| Butyrate vs. Combo | 500µM vs. 10pg/mL    | -26.83 | No  | ns | >0.9999 |
| Butyrate vs. Combo | 500µM vs. 25pg/mL    | -26.17 | No  | ns | >0.9999 |
| Butyrate vs. Combo | 500µM vs. 50pg/mL    | -6.667 | No  | ns | >0.9999 |
| Butyrate vs. Combo | 500µM vs. 100pg/mL   | -4.567 | No  | ns | >0.9999 |
| Butyrate vs. Combo | 500µM vs. 250pg/mL   | 29.17  | No  | ns | >0.9999 |
| TNFa vs. TNFa      | 10pg/mL vs. 25pg/mL  | 24.83  | No  | ns | >0.9999 |
| TNFa vs. TNFa      | 10pg/mL vs. 50pg/mL  | -16.5  | No  | ns | >0.9999 |
| TNFa vs. TNFa      | 10pg/mL vs. 100pg/mL | -4.5   | No  | ns | >0.9999 |
| TNFa vs. TNFa      | 10pg/mL vs. 250pg/mL | -19.33 | No  | ns | >0.9999 |
| TNFa vs. Combo     | 10pg/mL vs. 10pg/mL  | 10.17  | No  | ns | >0.9999 |
| TNFa vs. Combo     | 10pg/mL vs. 25pg/mL  | 23.33  | No  | ns | >0.9999 |
| TNFa vs. Combo     | 10pg/mL vs. 50pg/mL  | -10.5  | No  | ns | >0.9999 |
| TNFa vs. Combo     | 10pg/mL vs. 100pg/mL | -41.33 | No  | ns | >0.9999 |
| TNFa vs. Combo     | 10pg/mL vs. 250pg/mL | -9.833 | No  | ns | >0.9999 |
| TNFa vs. Combo     | 10pg/mL vs. 10pg/mL  | -71    | No  | ns | 0.4926  |
| TNFa vs. Combo     | 10pg/mL vs. 25pg/mL  | -70.33 | No  | ns | 0.5432  |
| TNFa vs. Combo     | 10pg/mL vs. 50pg/mL  | -50.83 | No  | ns | >0.9999 |
| TNFa vs. Combo     | 10pg/mL vs. 100pg/mL | -48.73 | No  | ns | >0.9999 |
| TNFa vs. Combo     | 10pg/mL vs. 250pg/mL | -15    | No  | ns | >0.9999 |
| TNFa vs. TNFa      | 25pg/mL vs. 50pg/mL  | -41.33 | No  | ns | >0.9999 |
| TNFa vs. TNFa      | 25pg/mL vs. 100pg/mL | -29.33 | No  | ns | >0.9999 |
| TNFa vs. TNFa      | 25pg/mL vs. 250pg/mL | -44.17 | No  | ns | >0.9999 |
| TNFa vs. Combo     | 25pg/mL vs. 10pg/mL  | -14.67 | No  | ns | >0.9999 |
| TNFa vs. Combo     | 25pg/mL vs. 25pg/mL  | -1.5   | No  | ns | >0.9999 |
| TNFa vs. Combo     | 25pg/mL vs. 50pg/mL  | -35.33 | No  | ns | >0.9999 |
| TNFa vs. Combo     | 25pg/mL vs. 100pg/mL | -66.17 | No  | ns | 0.9831  |
| TNFa vs. Combo     | 25pg/mL vs. 250pg/mL | -34.67 | No  | ns | >0.9999 |
| TNFa vs. Combo     | 25pg/mL vs. 10pg/mL  | -95.83 | Yes | ** | 0.0073  |
| TNFa vs. Combo     | 25pg/mL vs. 25pg/mL  | -95.17 | Yes | ** | 0.0083  |
| TNFa vs. Combo     | 25pg/mL vs. 50pg/mL  | -75.67 | No  | ns | 0.243   |
| TNFa vs. Combo     | 25pg/mL vs. 100pg/mL | -73.57 | No  | ns | 0.5585  |
| TNFa vs. Combo     | 25pg/mL vs. 250pg/mL | -39.83 | No  | ns | >0.9999 |
| TNFa vs. TNFa      | 50pg/mL vs. 100pg/mL | 12     | No  | ns | >0.9999 |
| TNFa vs. TNFa      | 50pg/mL vs. 250pg/mL | -2.833 | No  | ns | >0.9999 |
| TNFa vs. Combo     | 50pg/mL vs. 10pg/mL  | 26.67  | No  | ns | >0.9999 |
| TNFa vs. Combo     | 50pg/mL vs. 25pg/mL  | 39.83  | No  | ns | >0.9999 |
| TNFa vs. Combo     | 50pg/mL vs. 50pg/mL  | 6      | No  | ns | >0.9999 |
| TNFa vs. Combo     | 50pg/mL vs. 100pg/mL | -24.83 | No  | ns | >0.9999 |
| TNFa vs. Combo     | 50pg/mL vs. 250pg/mL | 6.667  | No  | ns | >0.9999 |
| TNFa vs. Combo     | 50pg/mL vs. 10pg/mL  | -54.5  | No  | ns | >0.9999 |
| TNFa vs. Combo     | 50pg/mL vs. 25pg/mL  | -53.83 | No  | ns | >0.9999 |
| TNFa vs. Combo     | 50pg/mL vs. 50pg/mL  | -34.33 | No  | ns | >0.9999 |
| TNFa vs. Combo     | 50pg/mL vs. 100pg/mL | -32.23 | No  | ns | >0.9999 |
| TNFa vs. Combo     | 50pg/mL vs. 250pg/mL | 1.5    | No  | ns | >0.9999 |

|                 |                       |            |    |         |
|-----------------|-----------------------|------------|----|---------|
| TNFa vs. TNFa   | 100pg/mL vs. 250pg/mL | -14.83 No  | ns | >0.9999 |
| TNFa vs. Combo  | 100pg/mL vs. 10pg/mL  | 14.67 No   | ns | >0.9999 |
| TNFa vs. Combo  | 100pg/mL vs. 25pg/mL  | 27.83 No   | ns | >0.9999 |
| TNFa vs. Combo  | 100pg/mL vs. 50pg/mL  | -6 No      | ns | >0.9999 |
| TNFa vs. Combo  | 100pg/mL vs. 100pg/mL | -36.83 No  | ns | >0.9999 |
| TNFa vs. Combo  | 100pg/mL vs. 250pg/mL | -5.333 No  | ns | >0.9999 |
| TNFa vs. Combo  | 100pg/mL vs. 10pg/mL  | -66.5 No   | ns | 0.9386  |
| TNFa vs. Combo  | 100pg/mL vs. 25pg/mL  | -65.83 No  | ns | >0.9999 |
| TNFa vs. Combo  | 100pg/mL vs. 50pg/mL  | -46.33 No  | ns | >0.9999 |
| TNFa vs. Combo  | 100pg/mL vs. 100pg/mL | -44.23 No  | ns | >0.9999 |
| TNFa vs. Combo  | 100pg/mL vs. 250pg/mL | -10.5 No   | ns | >0.9999 |
| TNFa vs. Combo  | 250pg/mL vs. 10pg/mL  | 29.5 No    | ns | >0.9999 |
| TNFa vs. Combo  | 250pg/mL vs. 25pg/mL  | 42.67 No   | ns | >0.9999 |
| TNFa vs. Combo  | 250pg/mL vs. 50pg/mL  | 8.833 No   | ns | >0.9999 |
| TNFa vs. Combo  | 250pg/mL vs. 100pg/mL | -22 No     | ns | >0.9999 |
| TNFa vs. Combo  | 250pg/mL vs. 250pg/mL | 9.5 No     | ns | >0.9999 |
| TNFa vs. Combo  | 250pg/mL vs. 10pg/mL  | -51.67 No  | ns | >0.9999 |
| TNFa vs. Combo  | 250pg/mL vs. 25pg/mL  | -51 No     | ns | >0.9999 |
| TNFa vs. Combo  | 250pg/mL vs. 50pg/mL  | -31.5 No   | ns | >0.9999 |
| TNFa vs. Combo  | 250pg/mL vs. 100pg/mL | -29.4 No   | ns | >0.9999 |
| TNFa vs. Combo  | 250pg/mL vs. 250pg/mL | 4.333 No   | ns | >0.9999 |
| Combo vs. Combo | 10pg/mL vs. 25pg/mL   | 13.17 No   | ns | >0.9999 |
| Combo vs. Combo | 10pg/mL vs. 50pg/mL   | -20.67 No  | ns | >0.9999 |
| Combo vs. Combo | 10pg/mL vs. 100pg/mL  | -51.5 No   | ns | >0.9999 |
| Combo vs. Combo | 10pg/mL vs. 250pg/mL  | -20 No     | ns | >0.9999 |
| Combo vs. Combo | 10pg/mL vs. 10pg/mL   | -81.17 No  | ns | 0.1005  |
| Combo vs. Combo | 10pg/mL vs. 25pg/mL   | -80.5 No   | ns | 0.1122  |
| Combo vs. Combo | 10pg/mL vs. 50pg/mL   | -61 No     | ns | >0.9999 |
| Combo vs. Combo | 10pg/mL vs. 100pg/mL  | -58.9 No   | ns | >0.9999 |
| Combo vs. Combo | 10pg/mL vs. 250pg/mL  | -25.17 No  | ns | >0.9999 |
| Combo vs. Combo | 25pg/mL vs. 50pg/mL   | -33.83 No  | ns | >0.9999 |
| Combo vs. Combo | 25pg/mL vs. 100pg/mL  | -64.67 No  | ns | >0.9999 |
| Combo vs. Combo | 25pg/mL vs. 250pg/mL  | -33.17 No  | ns | >0.9999 |
| Combo vs. Combo | 25pg/mL vs. 10pg/mL   | -94.33 Yes | ** | 0.0097  |
| Combo vs. Combo | 25pg/mL vs. 25pg/mL   | -93.67 Yes | *  | 0.011   |
| Combo vs. Combo | 25pg/mL vs. 50pg/mL   | -74.17 No  | ns | 0.3063  |
| Combo vs. Combo | 25pg/mL vs. 100pg/mL  | -72.07 No  | ns | 0.6866  |
| Combo vs. Combo | 25pg/mL vs. 250pg/mL  | -38.33 No  | ns | >0.9999 |
| Combo vs. Combo | 50pg/mL vs. 100pg/mL  | -30.83 No  | ns | >0.9999 |
| Combo vs. Combo | 50pg/mL vs. 250pg/mL  | 0.6667 No  | ns | >0.9999 |
| Combo vs. Combo | 50pg/mL vs. 10pg/mL   | -60.5 No   | ns | >0.9999 |
| Combo vs. Combo | 50pg/mL vs. 25pg/mL   | -59.83 No  | ns | >0.9999 |
| Combo vs. Combo | 50pg/mL vs. 50pg/mL   | -40.33 No  | ns | >0.9999 |
| Combo vs. Combo | 50pg/mL vs. 100pg/mL  | -38.23 No  | ns | >0.9999 |
| Combo vs. Combo | 50pg/mL vs. 250pg/mL  | -4.5 No    | ns | >0.9999 |
| Combo vs. Combo | 100pg/mL vs. 250pg/mL | 31.5 No    | ns | >0.9999 |
| Combo vs. Combo | 100pg/mL vs. 10pg/mL  | -29.67 No  | ns | >0.9999 |

|                 |                       |           |    |         |
|-----------------|-----------------------|-----------|----|---------|
| Combo vs. Combo | 100pg/mL vs. 25pg/mL  | -29 No    | ns | >0.9999 |
| Combo vs. Combo | 100pg/mL vs. 50pg/mL  | -9.5 No   | ns | >0.9999 |
| Combo vs. Combo | 100pg/mL vs. 100pg/mL | -7.4 No   | ns | >0.9999 |
| Combo vs. Combo | 100pg/mL vs. 250pg/mL | 26.33 No  | ns | >0.9999 |
| Combo vs. Combo | 250pg/mL vs. 10pg/mL  | -61.17 No | ns | >0.9999 |
| Combo vs. Combo | 250pg/mL vs. 25pg/mL  | -60.5 No  | ns | >0.9999 |
| Combo vs. Combo | 250pg/mL vs. 50pg/mL  | -41 No    | ns | >0.9999 |
| Combo vs. Combo | 250pg/mL vs. 100pg/mL | -38.9 No  | ns | >0.9999 |
| Combo vs. Combo | 250pg/mL vs. 250pg/mL | -5.167 No | ns | >0.9999 |
| Combo vs. Combo | 10pg/mL vs. 25pg/mL   | 0.6667 No | ns | >0.9999 |
| Combo vs. Combo | 10pg/mL vs. 50pg/mL   | 20.17 No  | ns | >0.9999 |
| Combo vs. Combo | 10pg/mL vs. 100pg/mL  | 22.27 No  | ns | >0.9999 |
| Combo vs. Combo | 10pg/mL vs. 250pg/mL  | 56 No     | ns | >0.9999 |
| Combo vs. Combo | 25pg/mL vs. 50pg/mL   | 19.5 No   | ns | >0.9999 |
| Combo vs. Combo | 25pg/mL vs. 100pg/mL  | 21.6 No   | ns | >0.9999 |
| Combo vs. Combo | 25pg/mL vs. 250pg/mL  | 55.33 No  | ns | >0.9999 |
| Combo vs. Combo | 50pg/mL vs. 100pg/mL  | 2.1 No    | ns | >0.9999 |
| Combo vs. Combo | 50pg/mL vs. 250pg/mL  | 35.83 No  | ns | >0.9999 |
| Combo vs. Combo | 100pg/mL vs. 250pg/mL | 33.73 No  |    |         |

Value

A-B

A-C

A-D

A-E

A-F

A-G

A-H

A-I

A-J

A-K

A-L

A-M

A-N

A-O

A-P

A-Q

A-R

A-S

A-T

A-U

A-V

A-W

B-C

B-D

B-E

B-F

B-G

B-H

B-I

B-J

B-K

B-L

B-M

B-N

B-O

B-P

B-Q

B-R

B-S

B-T

B-U

B-V

B-W

C-D

C-E

C-F

C-G  
C-H  
C-I  
C-J  
C-K  
C-L  
C-M  
C-N  
C-O  
C-P  
C-Q  
C-R  
C-S  
C-T  
C-U  
C-V  
C-W  
D-E  
D-F  
D-G  
D-H  
D-I  
D-J  
D-K  
D-L  
D-M  
D-N  
D-O  
D-P  
D-Q  
D-R  
D-S  
D-T  
D-U  
D-V  
D-W  
E-F  
E-G  
E-H  
E-I  
E-J  
E-K  
E-L  
E-M  
E-N  
E-O  
E-P

E-Q  
E-R  
E-S  
E-T  
E-U  
E-V  
E-W  
F-G  
F-H  
F-I  
F-J  
F-K  
F-L  
F-M  
F-N  
F-O  
F-P  
F-Q  
F-R  
F-S  
F-T  
F-U  
F-V  
F-W  
G-H  
G-I  
G-J  
G-K  
G-L  
G-M  
G-N  
G-O  
G-P  
G-Q  
G-R  
G-S  
G-T  
G-U  
G-V  
G-W  
H-I  
H-J  
H-K  
H-L  
H-M  
H-N  
H-O

H-P  
H-Q  
H-R  
H-S  
H-T  
H-U  
H-V  
H-W  
I-J  
I-K  
I-L  
I-M

I-N  
I-O  
I-P  
I-Q  
I-R  
I-S  
I-T  
I-U  
I-V  
I-W

J-K  
J-L  
J-M

J-N  
J-O  
J-P  
J-Q  
J-R  
J-S  
J-T  
J-U  
J-V  
J-W

K-L  
K-M

K-N  
K-O  
K-P  
K-Q  
K-R  
K-S  
K-T  
K-U  
K-V  
K-W

L-M

L-N

L-O

L-P

L-Q

L-R

L-S

L-T

L-U

L-V

L-W

M-N

M-O

M-P

M-Q

M-R

M-S

M-T

M-U

M-V

M-W

N-O

N-P

N-Q

N-R

N-S

N-T

N-U

N-V

N-W

O-P

O-Q

O-R

O-S

O-T

O-U

O-V

O-W

P-Q

P-R

P-S

P-T

P-U

P-V

P-W

Q-R

Q-S

Q-T  
Q-U  
Q-V  
Q-W  
R-S  
R-T  
R-U  
R-V  
R-W  
S-T  
S-U  
S-V  
S-W  
T-U  
T-V  
T-W  
U-V  
U-W

| Treatment          | Dunn's multiple comparisons test | Mean rank | Significant | Summary |
|--------------------|----------------------------------|-----------|-------------|---------|
| Media vs. FCCP     | Media vs. 8uM FCCP               | 63.83     | No          | ns      |
| Media vs. TNFa     | Media vs. 50pg/mL                | -17.33    | No          | ns      |
| Media vs. TNFa     | Media vs. 100pg/mL               | 20.67     | No          | ns      |
| Media vs. TNFa     | Media vs. 150pg/mL               | 23        | No          | ns      |
| Media vs. TNFa     | Media vs. 200pg/mL               | 44.83     | No          | ns      |
| Media vs. TNFa     | Media vs. 250pg/mL               | 31        | No          | ns      |
| Media vs. TNFa     | Media vs. 500pg/mL               | 22        | No          | ns      |
| Media vs. TNFa     | Media vs. 1000pg/mL              | 38.67     | No          | ns      |
| Media vs. TNFa     | Media vs. 2500pg/mL              | 37.33     | No          | ns      |
| Media vs. TNFa     | Media vs. 5000pg/mL              | 42.17     | No          | ns      |
| Medea vs. Butyrate | Media vs. 50uM                   | -24.17    | No          | ns      |
| Medea vs. Butyrate | Media vs. 75um                   | -33.5     | No          | ns      |
| Medea vs. Butyrate | Media vs. 100uM                  | -62.33    | No          | ns      |
| Medea vs. Butyrate | Media vs. 250µM                  | -72.6     | No          | ns      |
| Medea vs. Butyrate | Media vs. 500uM                  | -91       | No          | ns      |
| Medea vs. Butyrate | Media vs. 750uM                  | -93.67    | No          | ns      |
| Medea vs. Butyrate | Media vs. 1000uM                 | -90.6     | No          | ns      |
| Medea vs. Butyrate | Media vs. 2500uM                 | -59       | No          | ns      |
| Medea vs. Butyrate | Media vs. 5000uM                 | -37.17    | No          | ns      |
| Medea vs. Butyrate | Media vs. 7500uM                 | -16.8     | No          | ns      |
| Media vs. Combo    | Media vs. 50pg/mL                | -78.5     | No          | ns      |
| Media vs. Combo    | Media vs. 100pg/mL               | -62.83    | No          | ns      |
| Media vs. Combo    | Media vs. 150pg/mL               | -71.33    | No          | ns      |
| Media vs. Combo    | Media vs. 200pg/mL               | -69.5     | No          | ns      |
| Media vs. Combo    | Media vs. 250pg/mL               | -61.17    | No          | ns      |
| Media vs. Combo    | Media vs. 500pg/mL               | -44.17    | No          | ns      |
| Media vs. Combo    | Media vs. 1000pg/mL              | -20       | No          | ns      |
| Media vs. Combo    | Media vs. 2500pg/mL              | 7.5       | No          | ns      |
| Media vs. Combo    | Media vs. 5000pg/mL              | 32.33     | No          | ns      |
| FCCP vs. TNFa      | 8uM FCCP vs. 50pg/mL             | -81.17    | No          | ns      |
| FCCP vs. TNFa      | 8uM FCCP vs. 100pg/mL            | -43.17    | No          | ns      |
| FCCP vs. TNFa      | 8uM FCCP vs. 150pg/mL            | -40.83    | No          | ns      |
| FCCP vs. TNFa      | 8uM FCCP vs. 200pg/mL            | -19       | No          | ns      |
| FCCP vs. TNFa      | 8uM FCCP vs. 250pg/mL            | -32.83    | No          | ns      |
| FCCP vs. TNFa      | 8uM FCCP vs. 500pg/mL            | -41.83    | No          | ns      |
| FCCP vs. TNFa      | 8uM FCCP vs. 1000pg/mL           | -25.17    | No          | ns      |
| FCCP vs. TNFa      | 8uM FCCP vs. 2500pg/mL           | -26.5     | No          | ns      |
| FCCP vs. TNFa      | 8uM FCCP vs. 5000pg/mL           | -21.67    | No          | ns      |
| Media vs. Butyrate | 8uM FCCP vs. 50uM                | -88       | No          | ns      |
| Media vs. Butyrate | 8uM FCCP vs. 75um                | -97.33    | No          | ns      |
| Media vs. Butyrate | 8uM FCCP vs. 100uM               | -126.2    | Yes         | **      |
| Media vs. Butyrate | 8uM FCCP vs. 250µM               | -136.4    | Yes         | **      |
| Media vs. Butyrate | 8uM FCCP vs. 500uM               | -154.8    | Yes         | ****    |
| Media vs. Butyrate | 8uM FCCP vs. 750uM               | -157.5    | Yes         | **      |
| Media vs. Butyrate | 8uM FCCP vs. 1000uM              | -154.4    | Yes         | ***     |
| Media vs. Butyrate | 8uM FCCP vs. 2500uM              | -122.8    | Yes         | *       |

|                    |                        |            |     |
|--------------------|------------------------|------------|-----|
| Media vs. Butyrate | 8uM FCCP vs. 5000uM    | -101 No    | ns  |
| Media vs. Butyrate | 8uM FCCP vs. 7500uM    | -80.63 No  | ns  |
| FCCP vs. Combo     | 8uM FCCP vs. 50pg/mL   | -142.3 Yes | *** |
| FCCP vs. Combo     | 8uM FCCP vs. 100pg/mL  | -126.7 Yes | **  |
| FCCP vs. Combo     | 8uM FCCP vs. 150pg/mL  | -135.2 Yes | **  |
| FCCP vs. Combo     | 8uM FCCP vs. 200pg/mL  | -133.3 Yes | **  |
| FCCP vs. Combo     | 8uM FCCP vs. 250pg/mL  | -125 Yes   | **  |
| FCCP vs. Combo     | 8uM FCCP vs. 500pg/mL  | -108 No    | ns  |
| FCCP vs. Combo     | 8uM FCCP vs. 1000pg/mL | -83.83 No  | ns  |
| FCCP vs. Combo     | 8uM FCCP vs. 2500pg/mL | -56.33 No  | ns  |
| FCCP vs. Combo     | 8uM FCCP vs. 5000pg/mL | -31.5 No   | ns  |
| TNFa vs. TNFa      | 50pg/mL vs. 100pg/mL   | 38 No      | ns  |
| TNFa vs. TNFa      | 50pg/mL vs. 150pg/mL   | 40.33 No   | ns  |
| TNFa vs. TNFa      | 50pg/mL vs. 200pg/mL   | 62.17 No   | ns  |
| TNFa vs. TNFa      | 50pg/mL vs. 250pg/mL   | 48.33 No   | ns  |
| TNFa vs. TNFa      | 50pg/mL vs. 500pg/mL   | 39.33 No   | ns  |
| TNFa vs. TNFa      | 50pg/mL vs. 1000pg/mL  | 56 No      | ns  |
| TNFa vs. TNFa      | 50pg/mL vs. 2500pg/mL  | 54.67 No   | ns  |
| TNFa vs. TNFa      | 50pg/mL vs. 5000pg/mL  | 59.5 No    | ns  |
| TNFa vs. Butyrate  | 50pg/mL vs. 50uM       | -6.833 No  | ns  |
| TNFa vs. Butyrate  | 50pg/mL vs. 75um       | -16.17 No  | ns  |
| TNFa vs. Butyrate  | 50pg/mL vs. 100uM      | -45 No     | ns  |
| TNFa vs. Butyrate  | 50pg/mL vs. 250µM      | -55.27 No  | ns  |
| TNFa vs. Butyrate  | 50pg/mL vs. 500uM      | -73.67 No  | ns  |
| TNFa vs. Butyrate  | 50pg/mL vs. 750uM      | -76.33 No  | ns  |
| TNFa vs. Butyrate  | 50pg/mL vs. 1000uM     | -73.27 No  | ns  |
| TNFa vs. Butyrate  | 50pg/mL vs. 2500uM     | -41.67 No  | ns  |
| TNFa vs. Butyrate  | 50pg/mL vs. 5000uM     | -19.83 No  | ns  |
| TNFa vs. Butyrate  | 50pg/mL vs. 7500uM     | 0.5333 No  | ns  |
| TNFa vs. Combo     | 50pg/mL vs. 50pg/mL    | -61.17 No  | ns  |
| TNFa vs. Combo     | 50pg/mL vs. 100pg/mL   | -45.5 No   | ns  |
| TNFa vs. Combo     | 50pg/mL vs. 150pg/mL   | -54 No     | ns  |
| TNFa vs. Combo     | 50pg/mL vs. 200pg/mL   | -52.17 No  | ns  |
| TNFa vs. Combo     | 50pg/mL vs. 250pg/mL   | -43.83 No  | ns  |
| TNFa vs. Combo     | 50pg/mL vs. 500pg/mL   | -26.83 No  | ns  |
| TNFa vs. Combo     | 50pg/mL vs. 1000pg/mL  | -2.667 No  | ns  |
| TNFa vs. Combo     | 50pg/mL vs. 2500pg/mL  | 24.83 No   | ns  |
| TNFa vs. Combo     | 50pg/mL vs. 5000pg/mL  | 49.67 No   | ns  |
| TNFa vs. TNFa      | 100pg/mL vs. 150pg/mL  | 2.333 No   | ns  |
| TNFa vs. TNFa      | 100pg/mL vs. 200pg/mL  | 24.17 No   | ns  |
| TNFa vs. TNFa      | 100pg/mL vs. 250pg/mL  | 10.33 No   | ns  |
| TNFa vs. TNFa      | 100pg/mL vs. 500pg/mL  | 1.333 No   | ns  |
| TNFa vs. TNFa      | 100pg/mL vs. 1000pg/mL | 18 No      | ns  |
| TNFa vs. TNFa      | 100pg/mL vs. 2500pg/mL | 16.67 No   | ns  |
| TNFa vs. TNFa      | 100pg/mL vs. 5000pg/mL | 21.5 No    | ns  |
| TNFa vs. Butyrate  | 100pg/mL vs. 50uM      | -44.83 No  | ns  |
| TNFa vs. Butyrate  | 100pg/mL vs. 75um      | -54.17 No  | ns  |

|                   |                        |           |    |
|-------------------|------------------------|-----------|----|
| TNFa vs. Butyrate | 100pg/mL vs. 100uM     | -83 No    | ns |
| TNFa vs. Butyrate | 100pg/mL vs. 250µM     | -93.27 No | ns |
| TNFa vs. Butyrate | 100pg/mL vs. 500uM     | -111.7 No | ns |
| TNFa vs. Butyrate | 100pg/mL vs. 750uM     | -114.3 No | ns |
| TNFa vs. Butyrate | 100pg/mL vs. 1000uM    | -111.3 No | ns |
| TNFa vs. Butyrate | 100pg/mL vs. 2500uM    | -79.67 No | ns |
| TNFa vs. Butyrate | 100pg/mL vs. 5000uM    | -57.83 No | ns |
| TNFa vs. Butyrate | 100pg/mL vs. 7500uM    | -37.47 No | ns |
| TNFa vs. Combo    | 100pg/mL vs. 50pg/mL   | -99.17 No | ns |
| TNFa vs. Combo    | 100pg/mL vs. 100pg/mL  | -83.5 No  | ns |
| TNFa vs. Combo    | 100pg/mL vs. 150pg/mL  | -92 No    | ns |
| TNFa vs. Combo    | 100pg/mL vs. 200pg/mL  | -90.17 No | ns |
| TNFa vs. Combo    | 100pg/mL vs. 250pg/mL  | -81.83 No | ns |
| TNFa vs. Combo    | 100pg/mL vs. 500pg/mL  | -64.83 No | ns |
| TNFa vs. Combo    | 100pg/mL vs. 1000pg/mL | -40.67 No | ns |
| TNFa vs. Combo    | 100pg/mL vs. 2500pg/mL | -13.17 No | ns |
| TNFa vs. Combo    | 100pg/mL vs. 5000pg/mL | 11.67 No  | ns |
| TNFa vs. TNFa     | 150pg/mL vs. 200pg/mL  | 21.83 No  | ns |
| TNFa vs. TNFa     | 150pg/mL vs. 250pg/mL  | 8 No      | ns |
| TNFa vs. TNFa     | 150pg/mL vs. 500pg/mL  | -1 No     | ns |
| TNFa vs. TNFa     | 150pg/mL vs. 1000pg/mL | 15.67 No  | ns |
| TNFa vs. TNFa     | 150pg/mL vs. 2500pg/mL | 14.33 No  | ns |
| TNFa vs. TNFa     | 150pg/mL vs. 5000pg/mL | 19.17 No  | ns |
| TNFa vs. Butyrate | 150pg/mL vs. 50uM      | -47.17 No | ns |
| TNFa vs. Butyrate | 150pg/mL vs. 75um      | -56.5 No  | ns |
| TNFa vs. Butyrate | 150pg/mL vs. 100uM     | -85.33 No | ns |
| TNFa vs. Butyrate | 150pg/mL vs. 250µM     | -95.6 No  | ns |
| TNFa vs. Butyrate | 150pg/mL vs. 500uM     | -114 Yes  | *  |
| TNFa vs. Butyrate | 150pg/mL vs. 750uM     | -116.7 No | ns |
| TNFa vs. Butyrate | 150pg/mL vs. 1000uM    | -113.6 No | ns |
| TNFa vs. Butyrate | 150pg/mL vs. 2500uM    | -82 No    | ns |
| TNFa vs. Butyrate | 150pg/mL vs. 5000uM    | -60.17 No | ns |
| TNFa vs. Butyrate | 150pg/mL vs. 7500uM    | -39.8 No  | ns |
| TNFa vs. Combo    | 150pg/mL vs. 50pg/mL   | -101.5 No | ns |
| TNFa vs. Combo    | 150pg/mL vs. 100pg/mL  | -85.83 No | ns |
| TNFa vs. Combo    | 150pg/mL vs. 150pg/mL  | -94.33 No | ns |
| TNFa vs. Combo    | 150pg/mL vs. 200pg/mL  | -92.5 No  | ns |
| TNFa vs. Combo    | 150pg/mL vs. 250pg/mL  | -84.17 No | ns |
| TNFa vs. Combo    | 150pg/mL vs. 500pg/mL  | -67.17 No | ns |
| TNFa vs. Combo    | 150pg/mL vs. 1000pg/mL | -43 No    | ns |
| TNFa vs. Combo    | 150pg/mL vs. 2500pg/mL | -15.5 No  | ns |
| TNFa vs. Combo    | 150pg/mL vs. 5000pg/mL | 9.333 No  | ns |
| TNFa vs. TNFa     | 200pg/mL vs. 250pg/mL  | -13.83 No | ns |
| TNFa vs. TNFa     | 200pg/mL vs. 500pg/mL  | -22.83 No | ns |
| TNFa vs. TNFa     | 200pg/mL vs. 1000pg/mL | -6.167 No | ns |
| TNFa vs. TNFa     | 200pg/mL vs. 2500pg/mL | -7.5 No   | ns |
| TNFa vs. TNFa     | 200pg/mL vs. 5000pg/mL | -2.667 No | ns |

|                   |                        |            |    |
|-------------------|------------------------|------------|----|
| TNFa vs. Butyrate | 200pg/mL vs. 50uM      | -69 No     | ns |
| TNFa vs. Butyrate | 200pg/mL vs. 75um      | -78.33 No  | ns |
| TNFa vs. Butyrate | 200pg/mL vs. 100uM     | -107.2 No  | ns |
| TNFa vs. Butyrate | 200pg/mL vs. 250µM     | -117.4 No  | ns |
| TNFa vs. Butyrate | 200pg/mL vs. 500uM     | -135.8 Yes | ** |
| TNFa vs. Butyrate | 200pg/mL vs. 750uM     | -138.5 Yes | *  |
| TNFa vs. Butyrate | 200pg/mL vs. 1000uM    | -135.4 Yes | ** |
| TNFa vs. Butyrate | 200pg/mL vs. 2500uM    | -103.8 No  | ns |
| TNFa vs. Butyrate | 200pg/mL vs. 5000uM    | -82 No     | ns |
| TNFa vs. Butyrate | 200pg/mL vs. 7500uM    | -61.63 No  | ns |
| TNFa vs. Combo    | 200pg/mL vs. 50pg/mL   | -123.3 Yes | ** |
| TNFa vs. Combo    | 200pg/mL vs. 100pg/mL  | -107.7 No  | ns |
| TNFa vs. Combo    | 200pg/mL vs. 150pg/mL  | -116.2 Yes | *  |
| TNFa vs. Combo    | 200pg/mL vs. 200pg/mL  | -114.3 Yes | *  |
| TNFa vs. Combo    | 200pg/mL vs. 250pg/mL  | -106 No    | ns |
| TNFa vs. Combo    | 200pg/mL vs. 500pg/mL  | -89 No     | ns |
| TNFa vs. Combo    | 200pg/mL vs. 1000pg/mL | -64.83 No  | ns |
| TNFa vs. Combo    | 200pg/mL vs. 2500pg/mL | -37.33 No  | ns |
| TNFa vs. Combo    | 200pg/mL vs. 5000pg/mL | -12.5 No   | ns |
| TNFa vs. TNFa     | 250pg/mL vs. 500pg/mL  | -9 No      | ns |
| TNFa vs. TNFa     | 250pg/mL vs. 1000pg/mL | 7.667 No   | ns |
| TNFa vs. TNFa     | 250pg/mL vs. 2500pg/mL | 6.333 No   | ns |
| TNFa vs. TNFa     | 250pg/mL vs. 5000pg/mL | 11.17 No   | ns |
| TNFa vs. Butyrate | 250pg/mL vs. 50uM      | -55.17 No  | ns |
| TNFa vs. Butyrate | 250pg/mL vs. 75um      | -64.5 No   | ns |
| TNFa vs. Butyrate | 250pg/mL vs. 100uM     | -93.33 No  | ns |
| TNFa vs. Butyrate | 250pg/mL vs. 250µM     | -103.6 No  | ns |
| TNFa vs. Butyrate | 250pg/mL vs. 500uM     | -122 Yes   | *  |
| TNFa vs. Butyrate | 250pg/mL vs. 750uM     | -124.7 No  | ns |
| TNFa vs. Butyrate | 250pg/mL vs. 1000uM    | -121.6 Yes | *  |
| TNFa vs. Butyrate | 250pg/mL vs. 2500uM    | -90 No     | ns |
| TNFa vs. Butyrate | 250pg/mL vs. 5000uM    | -68.17 No  | ns |
| TNFa vs. Butyrate | 250pg/mL vs. 7500uM    | -47.8 No   | ns |
| TNFa vs. Combo    | 250pg/mL vs. 50pg/mL   | -109.5 No  | ns |
| TNFa vs. Combo    | 250pg/mL vs. 100pg/mL  | -93.83 No  | ns |
| TNFa vs. Combo    | 250pg/mL vs. 150pg/mL  | -102.3 No  | ns |
| TNFa vs. Combo    | 250pg/mL vs. 200pg/mL  | -100.5 No  | ns |
| TNFa vs. Combo    | 250pg/mL vs. 250pg/mL  | -92.17 No  | ns |
| TNFa vs. Combo    | 250pg/mL vs. 500pg/mL  | -75.17 No  | ns |
| TNFa vs. Combo    | 250pg/mL vs. 1000pg/mL | -51 No     | ns |
| TNFa vs. Combo    | 250pg/mL vs. 2500pg/mL | -23.5 No   | ns |
| TNFa vs. Combo    | 250pg/mL vs. 5000pg/mL | 1.333 No   | ns |
| TNFa vs. TNFa     | 500pg/mL vs. 1000pg/mL | 16.67 No   | ns |
| TNFa vs. TNFa     | 500pg/mL vs. 2500pg/mL | 15.33 No   | ns |
| TNFa vs. TNFa     | 500pg/mL vs. 5000pg/mL | 20.17 No   | ns |
| TNFa vs. Butyrate | 500pg/mL vs. 50uM      | -46.17 No  | ns |
| TNFa vs. Butyrate | 500pg/mL vs. 75um      | -55.5 No   | ns |

|                   |                         |            |    |
|-------------------|-------------------------|------------|----|
| TNFa vs. Butyrate | 500pg/mL vs. 100uM      | -84.33 No  | ns |
| TNFa vs. Butyrate | 500pg/mL vs. 250µM      | -94.6 No   | ns |
| TNFa vs. Butyrate | 500pg/mL vs. 500uM      | -113 Yes   | *  |
| TNFa vs. Butyrate | 500pg/mL vs. 750uM      | -115.7 No  | ns |
| TNFa vs. Butyrate | 500pg/mL vs. 1000uM     | -112.6 No  | ns |
| TNFa vs. Butyrate | 500pg/mL vs. 2500uM     | -81 No     | ns |
| TNFa vs. Butyrate | 500pg/mL vs. 5000uM     | -59.17 No  | ns |
| TNFa vs. Butyrate | 500pg/mL vs. 7500uM     | -38.8 No   | ns |
| TNFa vs. Combo    | 500pg/mL vs. 50pg/mL    | -100.5 No  | ns |
| TNFa vs. Combo    | 500pg/mL vs. 100pg/mL   | -84.83 No  | ns |
| TNFa vs. Combo    | 500pg/mL vs. 150pg/mL   | -93.33 No  | ns |
| TNFa vs. Combo    | 500pg/mL vs. 200pg/mL   | -91.5 No   | ns |
| TNFa vs. Combo    | 500pg/mL vs. 250pg/mL   | -83.17 No  | ns |
| TNFa vs. Combo    | 500pg/mL vs. 500pg/mL   | -66.17 No  | ns |
| TNFa vs. Combo    | 500pg/mL vs. 1000pg/mL  | -42 No     | ns |
| TNFa vs. Combo    | 500pg/mL vs. 2500pg/mL  | -14.5 No   | ns |
| TNFa vs. Combo    | 500pg/mL vs. 5000pg/mL  | 10.33 No   | ns |
| TNFa vs. TNFa     | 1000pg/mL vs. 2500pg/mL | -1.333 No  | ns |
| TNFa vs. TNFa     | 1000pg/mL vs. 5000pg/mL | 3.5 No     | ns |
| TNFa vs. Butyrate | 1000pg/mL vs. 50uM      | -62.83 No  | ns |
| TNFa vs. Butyrate | 1000pg/mL vs. 75um      | -72.17 No  | ns |
| TNFa vs. Butyrate | 1000pg/mL vs. 100uM     | -101 No    | ns |
| TNFa vs. Butyrate | 1000pg/mL vs. 250µM     | -111.3 No  | ns |
| TNFa vs. Butyrate | 1000pg/mL vs. 500uM     | -129.7 Yes | ** |
| TNFa vs. Butyrate | 1000pg/mL vs. 750uM     | -132.3 No  | ns |
| TNFa vs. Butyrate | 1000pg/mL vs. 1000uM    | -129.3 Yes | ** |
| TNFa vs. Butyrate | 1000pg/mL vs. 2500uM    | -97.67 No  | ns |
| TNFa vs. Butyrate | 1000pg/mL vs. 5000uM    | -75.83 No  | ns |
| TNFa vs. Butyrate | 1000pg/mL vs. 7500uM    | -55.47 No  | ns |
| TNFa vs. Combo    | 1000pg/mL vs. 50pg/mL   | -117.2 Yes | *  |
| TNFa vs. Combo    | 1000pg/mL vs. 100pg/mL  | -101.5 No  | ns |
| TNFa vs. Combo    | 1000pg/mL vs. 150pg/mL  | -110 No    | ns |
| TNFa vs. Combo    | 1000pg/mL vs. 200pg/mL  | -108.2 No  | ns |
| TNFa vs. Combo    | 1000pg/mL vs. 250pg/mL  | -99.83 No  | ns |
| TNFa vs. Combo    | 1000pg/mL vs. 500pg/mL  | -82.83 No  | ns |
| TNFa vs. Combo    | 1000pg/mL vs. 1000pg/mL | -58.67 No  | ns |
| TNFa vs. Combo    | 1000pg/mL vs. 2500pg/mL | -31.17 No  | ns |
| TNFa vs. Combo    | 1000pg/mL vs. 5000pg/mL | -6.333 No  | ns |
| TNFa vs. TNFa     | 2500pg/mL vs. 5000pg/mL | 4.833 No   | ns |
| TNFa vs. Butyrate | 2500pg/mL vs. 50uM      | -61.5 No   | ns |
| TNFa vs. Butyrate | 2500pg/mL vs. 75um      | -70.83 No  | ns |
| TNFa vs. Butyrate | 2500pg/mL vs. 100uM     | -99.67 No  | ns |
| TNFa vs. Butyrate | 2500pg/mL vs. 250µM     | -109.9 No  | ns |
| TNFa vs. Butyrate | 2500pg/mL vs. 500uM     | -128.3 Yes | ** |
| TNFa vs. Butyrate | 2500pg/mL vs. 750uM     | -131 No    | ns |
| TNFa vs. Butyrate | 2500pg/mL vs. 1000uM    | -127.9 Yes | *  |
| TNFa vs. Butyrate | 2500pg/mL vs. 2500uM    | -96.33 No  | ns |

|                       |                         |            |    |
|-----------------------|-------------------------|------------|----|
| TNFa vs. Butyrate     | 2500pg/mL vs. 5000uM    | -74.5 No   | ns |
| TNFa vs. Butyrate     | 2500pg/mL vs. 7500uM    | -54.13 No  | ns |
| TNFa vs. Combo        | 2500pg/mL vs. 50pg/mL   | -115.8 Yes | *  |
| TNFa vs. Combo        | 2500pg/mL vs. 100pg/mL  | -100.2 No  | ns |
| TNFa vs. Combo        | 2500pg/mL vs. 150pg/mL  | -108.7 No  | ns |
| TNFa vs. Combo        | 2500pg/mL vs. 200pg/mL  | -106.8 No  | ns |
| TNFa vs. Combo        | 2500pg/mL vs. 250pg/mL  | -98.5 No   | ns |
| TNFa vs. Combo        | 2500pg/mL vs. 500pg/mL  | -81.5 No   | ns |
| TNFa vs. Combo        | 2500pg/mL vs. 1000pg/mL | -57.33 No  | ns |
| TNFa vs. Combo        | 2500pg/mL vs. 2500pg/mL | -29.83 No  | ns |
| TNFa vs. Combo        | 2500pg/mL vs. 5000pg/mL | -5 No      | ns |
| TNFa vs. Butyrate     | 5000pg/mL vs. 50uM      | -66.33 No  | ns |
| TNFa vs. Butyrate     | 5000pg/mL vs. 75um      | -75.67 No  | ns |
| TNFa vs. Butyrate     | 5000pg/mL vs. 100uM     | -104.5 No  | ns |
| TNFa vs. Butyrate     | 5000pg/mL vs. 250µM     | -114.8 No  | ns |
| TNFa vs. Butyrate     | 5000pg/mL vs. 500uM     | -133.2 Yes | ** |
| TNFa vs. Butyrate     | 5000pg/mL vs. 750uM     | -135.8 No  | ns |
| TNFa vs. Butyrate     | 5000pg/mL vs. 1000uM    | -132.8 Yes | ** |
| TNFa vs. Butyrate     | 5000pg/mL vs. 2500uM    | -101.2 No  | ns |
| TNFa vs. Butyrate     | 5000pg/mL vs. 5000uM    | -79.33 No  | ns |
| TNFa vs. Butyrate     | 5000pg/mL vs. 7500uM    | -58.97 No  | ns |
| TNFa vs. Combo        | 5000pg/mL vs. 50pg/mL   | -120.7 Yes | *  |
| TNFa vs. Combo        | 5000pg/mL vs. 100pg/mL  | -105 No    | ns |
| TNFa vs. Combo        | 5000pg/mL vs. 150pg/mL  | -113.5 Yes | *  |
| TNFa vs. Combo        | 5000pg/mL vs. 200pg/mL  | -111.7 No  | ns |
| TNFa vs. Combo        | 5000pg/mL vs. 250pg/mL  | -103.3 No  | ns |
| TNFa vs. Combo        | 5000pg/mL vs. 500pg/mL  | -86.33 No  | ns |
| TNFa vs. Combo        | 5000pg/mL vs. 1000pg/mL | -62.17 No  | ns |
| TNFa vs. Combo        | 5000pg/mL vs. 2500pg/mL | -34.67 No  | ns |
| TNFa vs. Combo        | 5000pg/mL vs. 5000pg/mL | -9.833 No  | ns |
| Butyrate vs. Butyrate | 50uM vs. 75um           | -9.333 No  | ns |
| Butyrate vs. Butyrate | 50uM vs. 100uM          | -38.17 No  | ns |
| Butyrate vs. Butyrate | 50uM vs. 250µM          | -48.43 No  | ns |
| Butyrate vs. Butyrate | 50uM vs. 500uM          | -66.83 No  | ns |
| Butyrate vs. Butyrate | 50uM vs. 750uM          | -69.5 No   | ns |
| Butyrate vs. Butyrate | 50uM vs. 1000uM         | -66.43 No  | ns |
| Butyrate vs. Butyrate | 50uM vs. 2500uM         | -34.83 No  | ns |
| Butyrate vs. Butyrate | 50uM vs. 5000uM         | -13 No     | ns |
| Butyrate vs. Butyrate | 50uM vs. 7500uM         | 7.367 No   | ns |
| Butyrate vs. Combo    | 50uM vs. 50pg/mL        | -54.33 No  | ns |
| Butyrate vs. Combo    | 50uM vs. 100pg/mL       | -38.67 No  | ns |
| Butyrate vs. Combo    | 50uM vs. 150pg/mL       | -47.17 No  | ns |
| Butyrate vs. Combo    | 50uM vs. 200pg/mL       | -45.33 No  | ns |
| Butyrate vs. Combo    | 50uM vs. 250pg/mL       | -37 No     | ns |
| Butyrate vs. Combo    | 50uM vs. 500pg/mL       | -20 No     | ns |
| Butyrate vs. Combo    | 50uM vs. 1000pg/mL      | 4.167 No   | ns |
| Butyrate vs. Combo    | 50uM vs. 2500pg/mL      | 31.67 No   | ns |

|                       |                     |           |    |
|-----------------------|---------------------|-----------|----|
| Butyrate vs. Combo    | 50uM vs. 5000pg/mL  | 56.5 No   | ns |
| Butyrate vs. Butyrate | 75um vs. 100uM      | -28.83 No | ns |
| Butyrate vs. Butyrate | 75um vs. 250µM      | -39.1 No  | ns |
| Butyrate vs. Butyrate | 75um vs. 500uM      | -57.5 No  | ns |
| Butyrate vs. Butyrate | 75um vs. 750uM      | -60.17 No | ns |
| Butyrate vs. Butyrate | 75um vs. 1000uM     | -57.1 No  | ns |
| Butyrate vs. Butyrate | 75um vs. 2500uM     | -25.5 No  | ns |
| Butyrate vs. Butyrate | 75um vs. 5000uM     | -3.667 No | ns |
| Butyrate vs. Butyrate | 75um vs. 7500uM     | 16.7 No   | ns |
| Butyrate vs. Combo    | 75um vs. 50pg/mL    | -45 No    | ns |
| Butyrate vs. Combo    | 75um vs. 100pg/mL   | -29.33 No | ns |
| Butyrate vs. Combo    | 75um vs. 150pg/mL   | -37.83 No | ns |
| Butyrate vs. Combo    | 75um vs. 200pg/mL   | -36 No    | ns |
| Butyrate vs. Combo    | 75um vs. 250pg/mL   | -27.67 No | ns |
| Butyrate vs. Combo    | 75um vs. 500pg/mL   | -10.67 No | ns |
| Butyrate vs. Combo    | 75um vs. 1000pg/mL  | 13.5 No   | ns |
| Butyrate vs. Combo    | 75um vs. 2500pg/mL  | 41 No     | ns |
| Butyrate vs. Combo    | 75um vs. 5000pg/mL  | 65.83 No  | ns |
| Butyrate vs. Butyrate | 100uM vs. 250µM     | -10.27 No | ns |
| Butyrate vs. Butyrate | 100uM vs. 500uM     | -28.67 No | ns |
| Butyrate vs. Butyrate | 100uM vs. 750uM     | -31.33 No | ns |
| Butyrate vs. Butyrate | 100uM vs. 1000uM    | -28.27 No | ns |
| Butyrate vs. Butyrate | 100uM vs. 2500uM    | 3.333 No  | ns |
| Butyrate vs. Butyrate | 100uM vs. 5000uM    | 25.17 No  | ns |
| Butyrate vs. Butyrate | 100uM vs. 7500uM    | 45.53 No  | ns |
| Butyrate vs. Combo    | 100uM vs. 50pg/mL   | -16.17 No | ns |
| Butyrate vs. Combo    | 100uM vs. 100pg/mL  | -0.5 No   | ns |
| Butyrate vs. Combo    | 100uM vs. 150pg/mL  | -9 No     | ns |
| Butyrate vs. Combo    | 100uM vs. 200pg/mL  | -7.167 No | ns |
| Butyrate vs. Combo    | 100uM vs. 250pg/mL  | 1.167 No  | ns |
| Butyrate vs. Combo    | 100uM vs. 500pg/mL  | 18.17 No  | ns |
| Butyrate vs. Combo    | 100uM vs. 1000pg/mL | 42.33 No  | ns |
| Butyrate vs. Combo    | 100uM vs. 2500pg/mL | 69.83 No  | ns |
| Butyrate vs. Combo    | 100uM vs. 5000pg/mL | 94.67 No  | ns |
| Butyrate vs. Butyrate | 250µM vs. 500uM     | -18.4 No  | ns |
| Butyrate vs. Butyrate | 250µM vs. 750uM     | -21.07 No | ns |
| Butyrate vs. Butyrate | 250µM vs. 1000uM    | -18 No    | ns |
| Butyrate vs. Butyrate | 250µM vs. 2500uM    | 13.6 No   | ns |
| Butyrate vs. Butyrate | 250µM vs. 5000uM    | 35.43 No  | ns |
| Butyrate vs. Butyrate | 250µM vs. 7500uM    | 55.8 No   | ns |
| Butyrate vs. Combo    | 250µM vs. 50pg/mL   | -5.9 No   | ns |
| Butyrate vs. Combo    | 250µM vs. 100pg/mL  | 9.767 No  | ns |
| Butyrate vs. Combo    | 250µM vs. 150pg/mL  | 1.267 No  | ns |
| Butyrate vs. Combo    | 250µM vs. 200pg/mL  | 3.1 No    | ns |
| Butyrate vs. Combo    | 250µM vs. 250pg/mL  | 11.43 No  | ns |
| Butyrate vs. Combo    | 250µM vs. 500pg/mL  | 28.43 No  | ns |
| Butyrate vs. Combo    | 250µM vs. 1000pg/mL | 52.6 No   | ns |

|                       |                      |           |    |
|-----------------------|----------------------|-----------|----|
| Butyrate vs. Combo    | 250µM vs. 2500pg/mL  | 80.1 No   | ns |
| Butyrate vs. Combo    | 250µM vs. 5000pg/mL  | 104.9 No  | ns |
| Butyrate vs. Butyrate | 500uM vs. 750uM      | -2.667 No | ns |
| Butyrate vs. Butyrate | 500uM vs. 1000uM     | 0.4 No    | ns |
| Butyrate vs. Butyrate | 500uM vs. 2500uM     | 32 No     | ns |
| Butyrate vs. Butyrate | 500uM vs. 5000uM     | 53.83 No  | ns |
| Butyrate vs. Butyrate | 500uM vs. 7500uM     | 74.2 No   | ns |
| Butyrate vs. Combo    | 500uM vs. 50pg/mL    | 12.5 No   | ns |
| Butyrate vs. Combo    | 500uM vs. 100pg/mL   | 28.17 No  | ns |
| Butyrate vs. Combo    | 500uM vs. 150pg/mL   | 19.67 No  | ns |
| Butyrate vs. Combo    | 500uM vs. 200pg/mL   | 21.5 No   | ns |
| Butyrate vs. Combo    | 500uM vs. 250pg/mL   | 29.83 No  | ns |
| Butyrate vs. Combo    | 500uM vs. 500pg/mL   | 46.83 No  | ns |
| Butyrate vs. Combo    | 500uM vs. 1000pg/mL  | 71 No     | ns |
| Butyrate vs. Combo    | 500uM vs. 2500pg/mL  | 98.5 No   | ns |
| Butyrate vs. Combo    | 500uM vs. 5000pg/mL  | 123.3 Yes | ** |
| Butyrate vs. Butyrate | 750uM vs. 1000uM     | 3.067 No  | ns |
| Butyrate vs. Butyrate | 750uM vs. 2500uM     | 34.67 No  | ns |
| Butyrate vs. Butyrate | 750uM vs. 5000uM     | 56.5 No   | ns |
| Butyrate vs. Butyrate | 750uM vs. 7500uM     | 76.87 No  | ns |
| Butyrate vs. Combo    | 750uM vs. 50pg/mL    | 15.17 No  | ns |
| Butyrate vs. Combo    | 750uM vs. 100pg/mL   | 30.83 No  | ns |
| Butyrate vs. Combo    | 750uM vs. 150pg/mL   | 22.33 No  | ns |
| Butyrate vs. Combo    | 750uM vs. 200pg/mL   | 24.17 No  | ns |
| Butyrate vs. Combo    | 750uM vs. 250pg/mL   | 32.5 No   | ns |
| Butyrate vs. Combo    | 750uM vs. 500pg/mL   | 49.5 No   | ns |
| Butyrate vs. Combo    | 750uM vs. 1000pg/mL  | 73.67 No  | ns |
| Butyrate vs. Combo    | 750uM vs. 2500pg/mL  | 101.2 No  | ns |
| Butyrate vs. Combo    | 750uM vs. 5000pg/mL  | 126 No    | ns |
| Butyrate vs. Butyrate | 1000uM vs. 2500uM    | 31.6 No   | ns |
| Butyrate vs. Butyrate | 1000uM vs. 5000uM    | 53.43 No  | ns |
| Butyrate vs. Butyrate | 1000uM vs. 7500uM    | 73.8 No   | ns |
| Butyrate vs. Combo    | 1000uM vs. 50pg/mL   | 12.1 No   | ns |
| Butyrate vs. Combo    | 1000uM vs. 100pg/mL  | 27.77 No  | ns |
| Butyrate vs. Combo    | 1000uM vs. 150pg/mL  | 19.27 No  | ns |
| Butyrate vs. Combo    | 1000uM vs. 200pg/mL  | 21.1 No   | ns |
| Butyrate vs. Combo    | 1000uM vs. 250pg/mL  | 29.43 No  | ns |
| Butyrate vs. Combo    | 1000uM vs. 500pg/mL  | 46.43 No  | ns |
| Butyrate vs. Combo    | 1000uM vs. 1000pg/mL | 70.6 No   | ns |
| Butyrate vs. Combo    | 1000uM vs. 2500pg/mL | 98.1 No   | ns |
| Butyrate vs. Combo    | 1000uM vs. 5000pg/mL | 122.9 Yes | *  |
| Butyrate vs. Butyrate | 2500uM vs. 5000uM    | 21.83 No  | ns |
| Butyrate vs. Butyrate | 2500uM vs. 7500uM    | 42.2 No   | ns |
| Butyrate vs. Combo    | 2500uM vs. 50pg/mL   | -19.5 No  | ns |
| Butyrate vs. Combo    | 2500uM vs. 100pg/mL  | -3.833 No | ns |
| Butyrate vs. Combo    | 2500uM vs. 150pg/mL  | -12.33 No | ns |
| Butyrate vs. Combo    | 2500uM vs. 200pg/mL  | -10.5 No  | ns |

|                       |                        |           |    |
|-----------------------|------------------------|-----------|----|
| Butyrate vs. Combo    | 2500uM vs. 250pg/mL    | -2.167 No | ns |
| Butyrate vs. Combo    | 2500uM vs. 500pg/mL    | 14.83 No  | ns |
| Butyrate vs. Combo    | 2500uM vs. 1000pg/mL   | 39 No     | ns |
| Butyrate vs. Combo    | 2500uM vs. 2500pg/mL   | 66.5 No   | ns |
| Butyrate vs. Combo    | 2500uM vs. 5000pg/mL   | 91.33 No  | ns |
| Butyrate vs. Butyrate | 5000uM vs. 7500uM      | 20.37 No  | ns |
| Butyrate vs. Combo    | 5000uM vs. 50pg/mL     | -41.33 No | ns |
| Butyrate vs. Combo    | 5000uM vs. 100pg/mL    | -25.67 No | ns |
| Butyrate vs. Combo    | 5000uM vs. 150pg/mL    | -34.17 No | ns |
| Butyrate vs. Combo    | 5000uM vs. 200pg/mL    | -32.33 No | ns |
| Butyrate vs. Combo    | 5000uM vs. 250pg/mL    | -24 No    | ns |
| Butyrate vs. Combo    | 5000uM vs. 500pg/mL    | -7 No     | ns |
| Butyrate vs. Combo    | 5000uM vs. 1000pg/mL   | 17.17 No  | ns |
| Butyrate vs. Combo    | 5000uM vs. 2500pg/mL   | 44.67 No  | ns |
| Butyrate vs. Combo    | 5000uM vs. 5000pg/mL   | 69.5 No   | ns |
| Butyrate vs. Combo    | 7500uM vs. 50pg/mL     | -61.7 No  | ns |
| Butyrate vs. Combo    | 7500uM vs. 100pg/mL    | -46.03 No | ns |
| Butyrate vs. Combo    | 7500uM vs. 150pg/mL    | -54.53 No | ns |
| Butyrate vs. Combo    | 7500uM vs. 200pg/mL    | -52.7 No  | ns |
| Butyrate vs. Combo    | 7500uM vs. 250pg/mL    | -44.37 No | ns |
| Butyrate vs. Combo    | 7500uM vs. 500pg/mL    | -27.37 No | ns |
| Butyrate vs. Combo    | 7500uM vs. 1000pg/mL   | -3.2 No   | ns |
| Butyrate vs. Combo    | 7500uM vs. 2500pg/mL   | 24.3 No   | ns |
| Butyrate vs. Combo    | 7500uM vs. 5000pg/mL   | 49.13 No  | ns |
| Combo vs. Combo       | 50pg/mL vs. 100pg/mL   | 15.67 No  | ns |
| Combo vs. Combo       | 50pg/mL vs. 150pg/mL   | 7.167 No  | ns |
| Combo vs. Combo       | 50pg/mL vs. 200pg/mL   | 9 No      | ns |
| Combo vs. Combo       | 50pg/mL vs. 250pg/mL   | 17.33 No  | ns |
| Combo vs. Combo       | 50pg/mL vs. 500pg/mL   | 34.33 No  | ns |
| Combo vs. Combo       | 50pg/mL vs. 1000pg/mL  | 58.5 No   | ns |
| Combo vs. Combo       | 50pg/mL vs. 2500pg/mL  | 86 No     | ns |
| Combo vs. Combo       | 50pg/mL vs. 5000pg/mL  | 110.8 No  | ns |
| Combo vs. Combo       | 100pg/mL vs. 150pg/mL  | -8.5 No   | ns |
| Combo vs. Combo       | 100pg/mL vs. 200pg/mL  | -6.667 No | ns |
| Combo vs. Combo       | 100pg/mL vs. 250pg/mL  | 1.667 No  | ns |
| Combo vs. Combo       | 100pg/mL vs. 500pg/mL  | 18.67 No  | ns |
| Combo vs. Combo       | 100pg/mL vs. 1000pg/mL | 42.83 No  | ns |
| Combo vs. Combo       | 100pg/mL vs. 2500pg/mL | 70.33 No  | ns |
| Combo vs. Combo       | 100pg/mL vs. 5000pg/mL | 95.17 No  | ns |
| Combo vs. Combo       | 150pg/mL vs. 200pg/mL  | 1.833 No  | ns |
| Combo vs. Combo       | 150pg/mL vs. 250pg/mL  | 10.17 No  | ns |
| Combo vs. Combo       | 150pg/mL vs. 500pg/mL  | 27.17 No  | ns |
| Combo vs. Combo       | 150pg/mL vs. 1000pg/mL | 51.33 No  | ns |
| Combo vs. Combo       | 150pg/mL vs. 2500pg/mL | 78.83 No  | ns |
| Combo vs. Combo       | 150pg/mL vs. 5000pg/mL | 103.7 No  | ns |
| Combo vs. Combo       | 200pg/mL vs. 250pg/mL  | 8.333 No  | ns |
| Combo vs. Combo       | 200pg/mL vs. 500pg/mL  | 25.33 No  | ns |

|                 |                         |          |    |
|-----------------|-------------------------|----------|----|
| Combo vs. Combo | 200pg/mL vs. 1000pg/mL  | 49.5 No  | ns |
| Combo vs. Combo | 200pg/mL vs. 2500pg/mL  | 77 No    | ns |
| Combo vs. Combo | 200pg/mL vs. 5000pg/mL  | 101.8 No | ns |
| Combo vs. Combo | 250pg/mL vs. 500pg/mL   | 17 No    | ns |
| Combo vs. Combo | 250pg/mL vs. 1000pg/mL  | 41.17 No | ns |
| Combo vs. Combo | 250pg/mL vs. 2500pg/mL  | 68.67 No | ns |
| Combo vs. Combo | 250pg/mL vs. 5000pg/mL  | 93.5 No  | ns |
| Combo vs. Combo | 500pg/mL vs. 1000pg/mL  | 24.17 No | ns |
| Combo vs. Combo | 500pg/mL vs. 2500pg/mL  | 51.67 No | ns |
| Combo vs. Combo | 500pg/mL vs. 5000pg/mL  | 76.5 No  | ns |
| Combo vs. Combo | 1000pg/mL vs. 2500pg/mL | 27.5 No  | ns |
| Combo vs. Combo | 1000pg/mL vs. 5000pg/mL | 52.33 No | ns |
| Combo vs. Combo | 2500pg/mL vs. 5000pg/mL | 24.83 No | ns |

A-B  
A-C  
A-D  
A-E  
A-F  
A-G  
A-H  
A-I  
A-J  
A-K  
A-L  
A-M  
A-N  
A-O  
A-P  
A-Q  
A-R  
A-S  
A-T  
A-U  
A-V  
A-W  
A-X  
A-Y  
A-Z  
A-AA  
A-AB  
A-AC  
A-AD  
B-C  
B-D  
B-E  
B-F  
B-G  
B-H  
B-I  
B-J  
B-K  
B-L  
B-M  
B-N  
B-O  
B-P  
B-Q  
B-R  
B-S

B-T  
B-U  
B-V  
B-W  
B-X  
B-Y  
B-Z  
B-AA  
B-AB  
B-AC  
B-AD  
C-D  
C-E  
C-F  
C-G  
C-H  
C-I  
C-J  
C-K  
C-L  
C-M  
C-N  
C-O  
C-P  
C-Q  
C-R  
C-S  
C-T  
C-U  
C-V  
C-W  
C-X  
C-Y  
C-Z  
C-AA  
C-AB  
C-AC  
C-AD  
D-E  
D-F  
D-G  
D-H  
D-I  
D-J  
D-K  
D-L  
D-M

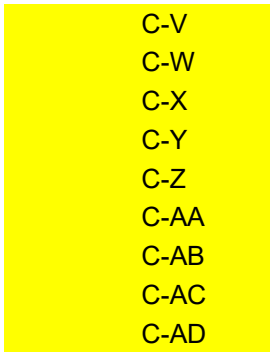

D-N  
D-O  
D-P  
D-Q  
D-R  
D-S  
D-T  
D-U

D-V  
D-W  
D-X  
D-Y  
D-Z  
D-AA  
D-AB  
D-AC  
D-AD

E-F  
E-G  
E-H  
E-I  
E-J  
E-K  
E-L  
E-M  
E-N  
E-O  
E-P  
E-Q  
E-R  
E-S  
E-T  
E-U

E-V  
E-W  
E-X  
E-Y  
E-Z  
E-AA  
E-AB  
E-AC  
E-AD

F-G  
F-H  
F-I  
F-J  
F-K

F-L

F-M

F-N

F-O

F-P

F-Q

F-R

F-S

F-T

F-U

F-V

F-W

F-X

F-Y

F-Z

F-AA

F-AB

F-AC

F-AD

G-H

G-I

G-J

G-K

G-L

G-M

G-N

G-O

G-P

G-Q

G-R

G-S

G-T

G-U

G-V

G-W

G-X

G-Y

G-Z

G-AA

G-AB

G-AC

G-AD

H-I

H-J

H-K

H-L

H-M

H-N  
H-O  
H-P  
H-Q  
H-R  
H-S  
H-T  
H-U

H-V  
H-W  
H-X  
H-Y  
H-Z  
H-AA  
H-AB  
H-AC  
H-AD

I-J  
I-K  
I-L  
I-M  
I-N  
I-O  
I-P  
I-Q  
I-R  
I-S  
I-T  
I-U

I-V  
I-W  
I-X  
I-Y  
I-Z  
I-AA  
I-AB  
I-AC  
I-AD

J-K  
J-L  
J-M  
J-N  
J-O  
J-P  
J-Q  
J-R  
J-S

J-T

J-U

J-V

J-W

J-X

J-Y

J-Z

J-AA

J-AB

J-AC

J-AD

K-L

K-M

K-N

K-O

K-P

K-Q

K-R

K-S

K-T

K-U

K-V

K-W

K-X

K-Y

K-Z

K-AA

K-AB

K-AC

K-AD

L-M

L-N

L-O

L-P

L-Q

L-R

L-S

L-T

L-U

L-V

L-W

L-X

L-Y

L-Z

L-AA

L-AB

L-AC

L-AD  
M-N  
M-O  
M-P  
M-Q  
M-R  
M-S  
M-T  
M-U  
M-V  
M-W  
M-X  
M-Y  
M-Z  
M-AA  
M-AB  
M-AC  
M-AD  
N-O  
N-P  
N-Q  
N-R  
N-S  
N-T  
N-U  
N-V  
N-W  
N-X  
N-Y  
N-Z  
N-AA  
N-AB  
N-AC  
N-AD  
O-P  
O-Q  
O-R  
O-S  
O-T  
O-U  
O-V  
O-W  
O-X  
O-Y  
O-Z  
O-AA  
O-AB

O-AC  
O-AD  
P-Q  
P-R  
P-S  
P-T  
P-U  
P-V  
P-W  
P-X  
P-Y  
P-Z  
P-AA  
P-AB  
P-AC  
P-AD  
Q-R  
Q-S  
Q-T  
Q-U  
Q-V  
Q-W  
Q-X  
Q-Y  
Q-Z  
Q-AA  
Q-AB  
Q-AC  
Q-AD  
R-S  
R-T  
R-U  
R-V  
R-W  
R-X  
R-Y  
R-Z  
R-AA  
R-AB  
R-AC  
R-AD  
S-T  
S-U  
S-V  
S-W  
S-X  
S-Y

S-Z  
S-AA  
S-AB  
S-AC  
S-AD  
T-U  
T-V  
T-W  
T-X  
T-Y  
T-Z  
T-AA  
T-AB  
T-AC  
T-AD  
U-V  
U-W  
U-X  
U-Y  
U-Z  
U-AA  
U-AB  
U-AC  
U-AD  
V-W  
V-X  
V-Y  
V-Z  
V-AA  
V-AB  
V-AC  
V-AD  
W-X  
W-Y  
W-Z  
W-AA  
W-AB  
W-AC  
W-AD  
X-Y  
X-Z  
X-AA  
X-AB  
X-AC  
X-AD  
Y-Z  
Y-AA

Y-AB  
Y-AC  
Y-AD  
Z-AA  
Z-AB  
Z-AC  
Z-AD  
AA-AB  
AA-AC  
AA-AD  
AB-AC  
AB-AD  
AC-AD

| Treatment          | Dunn's multiple comparisons test | Mean rank | Significant' | Summary |
|--------------------|----------------------------------|-----------|--------------|---------|
| Media vs. TNFa     | Media vs. 250 pg/mL              | -29.67    | No           | ns      |
| Media vs. TNFa     | Media vs. 500 pg/mL              | -41.17    | No           | ns      |
| Media vs. TNFa     | Media vs. 750 pg/mL              | -32       | No           | ns      |
| Media vs. TNFa     | Media vs. 1000 pg/mL             | -26.17    | No           | ns      |
| Media vs. Butyrate | Media vs. 500 $\mu$ M            | 28.83     | No           | ns      |
| Media vs. Butyrate | Media vs. 1000 $\mu$ M           | 22.67     | No           | ns      |
| Media vs. Butyrate | Media vs. 2500 $\mu$ M           | -3.833    | No           | ns      |
| Media vs. Butyrate | Media vs. 5000 $\mu$ M           | -6.5      | No           | ns      |
| Media vs. Combo    | Media vs. 250 pg/mL              | -12.33    | No           | ns      |
| Media vs. Combo    | Media vs. 500 pg/mL              | -22       | No           | ns      |
| Media vs. Combo    | Media vs. 750 pg/mL              | -5.667    | No           | ns      |
| Media vs. Combo    | Media vs. 1000 pg/mL             | 10.83     | No           | ns      |
| TNFa vs. TNFa      | 250 pg/mL vs. 500 pg/mL          | -11.5     | No           | ns      |
| TNFa vs. TNFa      | 250 pg/mL vs. 750 pg/mL          | -2.333    | No           | ns      |
| TNFa vs. TNFa      | 250 pg/mL vs. 1000 pg/mL         | 3.5       | No           | ns      |
| TNFa vs. Butyrate  | 250 pg/mL vs. 500 $\mu$ M        | 58.5      | Yes          | **      |
| TNFa vs. Butyrate  | 250 pg/mL vs. 1000 $\mu$ M       | 52.33     | Yes          | **      |
| TNFa vs. Butyrate  | 250 pg/mL vs. 2500 $\mu$ M       | 25.83     | No           | ns      |
| TNFa vs. Butyrate  | 250 pg/mL vs. 5000 $\mu$ M       | 23.17     | No           | ns      |
| TNFa vs. Combo     | 250 pg/mL vs. 250 pg/mL          | 17.33     | No           | ns      |
| TNFa vs. Combo     | 250 pg/mL vs. 500 pg/mL          | 7.667     | No           | ns      |
| TNFa vs. Combo     | 250 pg/mL vs. 750 pg/mL          | 24        | No           | ns      |
| TNFa vs. Combo     | 250 pg/mL vs. 1000 pg/mL         | 40.5      | No           | ns      |
| TNFa vs. TNFa      | 500 pg/mL vs. 750 pg/mL          | 9.167     | No           | ns      |
| TNFa vs. TNFa      | 500 pg/mL vs. 1000 pg/mL         | 15        | No           | ns      |
| TNFa vs. Butyrate  | 500 pg/mL vs. 500 $\mu$ M        | 70        | Yes          | ****    |
| TNFa vs. Butyrate  | 500 pg/mL vs. 1000 $\mu$ M       | 63.83     | Yes          | ***     |
| TNFa vs. Butyrate  | 500 pg/mL vs. 2500 $\mu$ M       | 37.33     | No           | ns      |
| TNFa vs. Butyrate  | 500 pg/mL vs. 5000 $\mu$ M       | 34.67     | No           | ns      |
| TNFa vs. Combo     | 500 pg/mL vs. 250 pg/mL          | 28.83     | No           | ns      |
| TNFa vs. Combo     | 500 pg/mL vs. 500 pg/mL          | 19.17     | No           | ns      |
| TNFa vs. Combo     | 500 pg/mL vs. 750 pg/mL          | 35.5      | No           | ns      |
| TNFa vs. Combo     | 500 pg/mL vs. 1000 pg/mL         | 52        | Yes          | *       |
| TNFa vs. TNFa      | 750 pg/mL vs. 1000 pg/mL         | 5.833     | No           | ns      |
| TNFa vs. Butyrate  | 750 pg/mL vs. 500 $\mu$ M        | 60.83     | Yes          | ***     |
| TNFa vs. Butyrate  | 750 pg/mL vs. 1000 $\mu$ M       | 54.67     | Yes          | **      |
| TNFa vs. Butyrate  | 750 pg/mL vs. 2500 $\mu$ M       | 28.17     | No           | ns      |
| TNFa vs. Butyrate  | 750 pg/mL vs. 5000 $\mu$ M       | 25.5      | No           | ns      |
| TNFa vs. Combo     | 750 pg/mL vs. 250 pg/mL          | 19.67     | No           | ns      |
| TNFa vs. Combo     | 750 pg/mL vs. 500 pg/mL          | 10        | No           | ns      |
| TNFa vs. Combo     | 750 pg/mL vs. 750 pg/mL          | 26.33     | No           | ns      |
| TNFa vs. Combo     | 750 pg/mL vs. 1000 pg/mL         | 42.83     | No           | ns      |
| TNFa vs. Butyrate  | 1000 pg/mL vs. 500 $\mu$ M       | 55        | Yes          | **      |
| TNFa vs. Butyrate  | 1000 pg/mL vs. 1000 $\mu$ M      | 48.83     | Yes          | *       |
| TNFa vs. Butyrate  | 1000 pg/mL vs. 2500 $\mu$ M      | 22.33     | No           | ns      |
| TNFa vs. Butyrate  | 1000 pg/mL vs. 5000 $\mu$ M      | 19.67     | No           | ns      |

|                       |                           |            |    |
|-----------------------|---------------------------|------------|----|
| TNFa vs. Combo        | 1000 pg/mL vs. 250 pg/mL  | 13.83 No   | ns |
| TNFa vs. Combo        | 1000 pg/mL vs. 500 pg/mL  | 4.167 No   | ns |
| TNFa vs. Combo        | 1000 pg/mL vs. 750 pg/mL  | 20.5 No    | ns |
| TNFa vs. Combo        | 1000 pg/mL vs. 1000 pg/mL | 37 No      | ns |
| Butyrate vs. Butyrate | 500 µM vs. 1000 µM        | -6.167 No  | ns |
| Butyrate vs. Butyrate | 500 µM vs. 2500 µM        | -32.67 No  | ns |
| Butyrate vs. Butyrate | 500 µM vs. 5000 µM        | -35.33 No  | ns |
| Butyrate vs. Combo    | 500 µM vs. 250 pg/mL      | -41.17 No  | ns |
| Butyrate vs. Combo    | 500 µM vs. 500 pg/mL      | -50.83 Yes | *  |
| Butyrate vs. Combo    | 500 µM vs. 750 pg/mL      | -34.5 No   | ns |
| Butyrate vs. Combo    | 500 µM vs. 1000 pg/mL     | -18 No     | ns |
| Butyrate vs. Butyrate | 1000 µM vs. 2500 µM       | -26.5 No   | ns |
| Butyrate vs. Butyrate | 1000 µM vs. 5000 µM       | -29.17 No  | ns |
| Butyrate vs. Combo    | 1000 µM vs. 250 pg/mL     | -35 No     | ns |
| Butyrate vs. Combo    | 1000 µM vs. 500 pg/mL     | -44.67 No  | ns |
| Butyrate vs. Combo    | 1000 µM vs. 750 pg/mL     | -28.33 No  | ns |
| Butyrate vs. Combo    | 1000 µM vs. 1000 pg/mL    | -11.83 No  | ns |
| Butyrate vs. Butyrate | 2500 µM vs. 5000 µM       | -2.667 No  | ns |
| Butyrate vs. Combo    | 2500 µM vs. 250 pg/mL     | -8.5 No    | ns |
| Butyrate vs. Combo    | 2500 µM vs. 500 pg/mL     | -18.17 No  | ns |
| Butyrate vs. Combo    | 2500 µM vs. 750 pg/mL     | -1.833 No  | ns |
| Butyrate vs. Combo    | 2500 µM vs. 1000 pg/mL    | 14.67 No   | ns |
| Butyrate vs. Combo    | 5000 µM vs. 250 pg/mL     | -5.833 No  | ns |
| Butyrate vs. Combo    | 5000 µM vs. 500 pg/mL     | -15.5 No   | ns |
| Butyrate vs. Combo    | 5000 µM vs. 750 pg/mL     | 0.8333 No  | ns |
| Butyrate vs. Combo    | 5000 µM vs. 1000 pg/mL    | 17.33 No   | ns |
| Combo vs. Combo       | 250 pg/mL vs. 500 pg/mL   | -9.667 No  | ns |
| Combo vs. Combo       | 250 pg/mL vs. 750 pg/mL   | 6.667 No   | ns |
| Combo vs. Combo       | 250 pg/mL vs. 1000 pg/mL  | 23.17 No   | ns |
| Combo vs. Combo       | 500 pg/mL vs. 750 pg/mL   | 16.33 No   | ns |
| Combo vs. Combo       | 500 pg/mL vs. 1000 pg/mL  | 32.83 No   | ns |
| Combo vs. Combo       | 750 pg/mL vs. 1000 pg/mL  | 16.5 No    | ns |

A-C

A-D

A-E

A-F

A-G

A-H

A-I

A-J

A-K

A-L

A-M

A-N

C-D

C-E

C-F

C-G

C-H

C-I

C-J

C-K

C-L

C-M

C-N

D-E

D-F

D-G

D-H

D-I

D-J

D-K

D-L

D-M

D-N

E-F

E-G

E-H

E-I

E-J

E-K

E-L

E-M

E-N

F-G

F-H

F-I

F-J

F-K

F-L

F-M

F-N

G-H

G-I

G-J

G-K

G-L

G-M

G-N

H-I

H-J

H-K

H-L

H-M

H-N

I-J

I-K

I-L

I-M

I-N

J-K

J-L

J-M

J-N

K-L

K-M

K-N

L-M

L-N

M-N

| Treatment          | Dunn's multiple comparisons test | Mean rank | Significant' | Summary | Adjusted P |
|--------------------|----------------------------------|-----------|--------------|---------|------------|
| Media vs. Men      | Media vs. 50µM MEN               | -101.8    | No           | ns      | 0.3096     |
| Media vs. TNFa     | Media vs. 50pg/mL                | 4.667     | No           | ns      | >0.9999    |
| Media vs. TNFa     | Media vs. 100pg/mL               | 39        | No           | ns      | >0.9999    |
| Media vs. TNFa     | Media vs. 150pg/mL               | 45.92     | No           | ns      | >0.9999    |
| Media vs. TNFa     | Media vs. 200pg/mL               | 30.17     | No           | ns      | >0.9999    |
| Media vs. TNFa     | Media vs. 250pg/mL               | 58.17     | No           | ns      | >0.9999    |
| Media vs. TNFa     | Media vs. 500pg/mL               | 44.67     | No           | ns      | >0.9999    |
| Media vs. TNFa     | Media vs. 1000pg/mL              | -63       | No           | ns      | >0.9999    |
| Media vs. TNFa     | Media vs. 2500pg/mL              | -25       | No           | ns      | >0.9999    |
| Media vs. TNFa     | Media vs. 5000pg/mL              | 10.33     | No           | ns      | >0.9999    |
| Media vs. Butyrate | Media vs. 50µM                   | -11.83    | No           | ns      | >0.9999    |
| Media vs. Butyrate | Media vs. 75µM                   | 12.5      | No           | ns      | >0.9999    |
| Media vs. Butyrate | Media vs. 100µM                  | 20.83     | No           | ns      | >0.9999    |
| Media vs. Butyrate | Media vs. 250µM                  | 56.33     | No           | ns      | >0.9999    |
| Media vs. Butyrate | Media vs. 500µM                  | 1.5       | No           | ns      | >0.9999    |
| Media vs. Butyrate | Media vs. 750µM                  | -74.83    | No           | ns      | >0.9999    |
| Media vs. Butyrate | Media vs. 1000µM                 | -69.17    | No           | ns      | >0.9999    |
| Media vs. Butyrate | Media vs. 2500µM                 | -56.58    | No           | ns      | >0.9999    |
| Media vs. Butyrate | Media vs. 5000µM                 | -52.67    | No           | ns      | >0.9999    |
| Media vs. Butyrate | Media vs. 7500µM                 | -24.83    | No           | ns      | >0.9999    |
| Media vs. Combo    | Media vs. 50pg/mL                | -12.33    | No           | ns      | >0.9999    |
| Media vs. Combo    | Media vs. 100pg/mL               | 41.58     | No           | ns      | >0.9999    |
| Media vs. Combo    | Media vs. 150pg/mL               | 45.83     | No           | ns      | >0.9999    |
| Media vs. Combo    | Media vs. 200pg/mL               | -78       | No           | ns      | >0.9999    |
| Media vs. Combo    | Media vs. 250pg/mL               | -76.17    | No           | ns      | >0.9999    |
| Media vs. Combo    | Media vs. 500pg/mL               | -74.5     | No           | ns      | >0.9999    |
| Media vs. Combo    | Media vs. 1000pg/mL              | -53.25    | No           | ns      | >0.9999    |
| Media vs. Combo    | Media vs. 2500pg/mL              | -47.33    | No           | ns      | >0.9999    |
| Media vs. Combo    | Media vs. 5000pg/mL              | -40.17    | No           | ns      | >0.9999    |
| MEN vs. TNFa       | 50µM MEN vs. 50pg/mL             | 106.5     | No           | ns      | 0.1739     |
| MEN vs. TNFa       | 50µM MEN vs. 100pg/mL            | 140.8     | Yes          | **      | 0.0012     |
| MEN vs. TNFa       | 50µM MEN vs. 150pg/mL            | 147.8     | Yes          | ***     | 0.0004     |
| MEN vs. TNFa       | 50µM MEN vs. 200pg/mL            | 132       | Yes          | **      | 0.005      |
| MEN vs. TNFa       | 50µM MEN vs. 250pg/mL            | 160       | Yes          | ****    | <0.0001    |
| MEN vs. TNFa       | 50µM MEN vs. 500pg/mL            | 146.5     | Yes          | ***     | 0.0005     |
| MEN vs. TNFa       | 50µM MEN vs. 1000pg/mL           | 38.83     | No           | ns      | >0.9999    |
| MEN vs. TNFa       | 50µM MEN vs. 2500pg/mL           | 76.83     | No           | ns      | >0.9999    |
| MEN vs. TNFa       | 50µM MEN vs. 5000pg/mL           | 112.2     | No           | ns      | 0.0838     |
| MEN vs. Butyrate   | 50µM MEN vs. 50µM                | 90        | No           | ns      | >0.9999    |
| MEN vs. Butyrate   | 50µM MEN vs. 75µM                | 114.3     | No           | ns      | 0.0628     |
| MEN vs. Butyrate   | 50µM MEN vs. 100µM               | 122.7     | Yes          | *       | 0.0198     |
| MEN vs. Butyrate   | 50µM MEN vs. 250µM               | 158.2     | Yes          | ****    | <0.0001    |
| MEN vs. Butyrate   | 50µM MEN vs. 500µM               | 103.3     | No           | ns      | 0.2578     |
| MEN vs. Butyrate   | 50µM MEN vs. 750µM               | 27        | No           | ns      | >0.9999    |
| MEN vs. Butyrate   | 50µM MEN vs. 1000µM              | 32.67     | No           | ns      | >0.9999    |
| MEN vs. Butyrate   | 50µM MEN vs. 2500µM              | 45.25     | No           | ns      | >0.9999    |

|                   |                        |           |     |         |
|-------------------|------------------------|-----------|-----|---------|
| MEN vs. Butyrate  | 50μM MEN vs. 5000μM    | 49.17 No  | ns  | >0.9999 |
| MEN vs. Butyrate  | 50μM MEN vs. 7500μM    | 77 No     | ns  | >0.9999 |
| MEN vs. Combo     | 50μM MEN vs. 50pg/mL   | 89.5 No   | ns  | >0.9999 |
| MEN vs. Combo     | 50μM MEN vs. 100pg/mL  | 143.4 Yes | *** | 0.0008  |
| MEN vs. Combo     | 50μM MEN vs. 150pg/mL  | 147.7 Yes | *** | 0.0004  |
| MEN vs. Combo     | 50μM MEN vs. 200pg/mL  | 23.83 No  | ns  | >0.9999 |
| MEN vs. Combo     | 50μM MEN vs. 250pg/mL  | 25.67 No  | ns  | >0.9999 |
| MEN vs. Combo     | 50μM MEN vs. 500pg/mL  | 27.33 No  | ns  | >0.9999 |
| MEN vs. Combo     | 50μM MEN vs. 1000pg/mL | 48.58 No  | ns  | >0.9999 |
| MEN vs. Combo     | 50μM MEN vs. 2500pg/mL | 54.5 No   | ns  | >0.9999 |
| MEN vs. Combo     | 50μM MEN vs. 5000pg/mL | 61.67 No  | ns  | >0.9999 |
| TNFa vs. TNFa     | 50pg/mL vs. 100pg/mL   | 34.33 No  | ns  | >0.9999 |
| TNFa vs. TNFa     | 50pg/mL vs. 150pg/mL   | 41.25 No  | ns  | >0.9999 |
| TNFa vs. TNFa     | 50pg/mL vs. 200pg/mL   | 25.5 No   | ns  | >0.9999 |
| TNFa vs. TNFa     | 50pg/mL vs. 250pg/mL   | 53.5 No   | ns  | >0.9999 |
| TNFa vs. TNFa     | 50pg/mL vs. 500pg/mL   | 40 No     | ns  | >0.9999 |
| TNFa vs. TNFa     | 50pg/mL vs. 1000pg/mL  | -67.67 No | ns  | >0.9999 |
| TNFa vs. TNFa     | 50pg/mL vs. 2500pg/mL  | -29.67 No | ns  | >0.9999 |
| TNFa vs. TNFa     | 50pg/mL vs. 5000pg/mL  | 5.667 No  | ns  | >0.9999 |
| TNFa vs. Butyrate | 50pg/mL vs. 50μM       | -16.5 No  | ns  | >0.9999 |
| TNFa vs. Butyrate | 50pg/mL vs. 75μM       | 7.833 No  | ns  | >0.9999 |
| TNFa vs. Butyrate | 50pg/mL vs. 100μM      | 16.17 No  | ns  | >0.9999 |
| TNFa vs. Butyrate | 50pg/mL vs. 250μM      | 51.67 No  | ns  | >0.9999 |
| TNFa vs. Butyrate | 50pg/mL vs. 500μM      | -3.167 No | ns  | >0.9999 |
| TNFa vs. Butyrate | 50pg/mL vs. 750μM      | -79.5 No  | ns  | >0.9999 |
| TNFa vs. Butyrate | 50pg/mL vs. 1000μM     | -73.83 No | ns  | >0.9999 |
| TNFa vs. Butyrate | 50pg/mL vs. 2500μM     | -61.25 No | ns  | >0.9999 |
| TNFa vs. Butyrate | 50pg/mL vs. 5000μM     | -57.33 No | ns  | >0.9999 |
| TNFa vs. Butyrate | 50pg/mL vs. 7500μM     | -29.5 No  | ns  | >0.9999 |
| TNFa vs. Combo    | 50pg/mL vs. 50pg/mL    | -17 No    | ns  | >0.9999 |
| TNFa vs. Combo    | 50pg/mL vs. 100pg/mL   | 36.92 No  | ns  | >0.9999 |
| TNFa vs. Combo    | 50pg/mL vs. 150pg/mL   | 41.17 No  | ns  | >0.9999 |
| TNFa vs. Combo    | 50pg/mL vs. 200pg/mL   | -82.67 No | ns  | >0.9999 |
| TNFa vs. Combo    | 50pg/mL vs. 250pg/mL   | -80.83 No | ns  | >0.9999 |
| TNFa vs. Combo    | 50pg/mL vs. 500pg/mL   | -79.17 No | ns  | >0.9999 |
| TNFa vs. Combo    | 50pg/mL vs. 1000pg/mL  | -57.92 No | ns  | >0.9999 |
| TNFa vs. Combo    | 50pg/mL vs. 2500pg/mL  | -52 No    | ns  | >0.9999 |
| TNFa vs. Combo    | 50pg/mL vs. 5000pg/mL  | -44.83 No | ns  | >0.9999 |
| TNFa vs. TNFa     | 100pg/mL vs. 150pg/mL  | 6.917 No  | ns  | >0.9999 |
| TNFa vs. TNFa     | 100pg/mL vs. 200pg/mL  | -8.833 No | ns  | >0.9999 |
| TNFa vs. TNFa     | 100pg/mL vs. 250pg/mL  | 19.17 No  | ns  | >0.9999 |
| TNFa vs. TNFa     | 100pg/mL vs. 500pg/mL  | 5.667 No  | ns  | >0.9999 |
| TNFa vs. TNFa     | 100pg/mL vs. 1000pg/mL | -102 No   | ns  | 0.3034  |
| TNFa vs. TNFa     | 100pg/mL vs. 2500pg/mL | -64 No    | ns  | >0.9999 |
| TNFa vs. TNFa     | 100pg/mL vs. 5000pg/mL | -28.67 No | ns  | >0.9999 |
| TNFa vs. Butyrate | 100pg/mL vs. 50μM      | -50.83 No | ns  | >0.9999 |
| TNFa vs. Butyrate | 100pg/mL vs. 75μM      | -26.5 No  | ns  | >0.9999 |

|                   |                        |             |    |         |
|-------------------|------------------------|-------------|----|---------|
| TNFa vs. Butyrate | 100pg/mL vs. 100µM     | -18.17 No   | ns | >0.9999 |
| TNFa vs. Butyrate | 100pg/mL vs. 250µM     | 17.33 No    | ns | >0.9999 |
| TNFa vs. Butyrate | 100pg/mL vs. 500µM     | -37.5 No    | ns | >0.9999 |
| TNFa vs. Butyrate | 100pg/mL vs. 750µM     | -113.8 No   | ns | 0.0671  |
| TNFa vs. Butyrate | 100pg/mL vs. 1000µM    | -108.2 No   | ns | 0.1408  |
| TNFa vs. Butyrate | 100pg/mL vs. 2500µM    | -95.58 No   | ns | 0.6466  |
| TNFa vs. Butyrate | 100pg/mL vs. 5000µM    | -91.67 No   | ns | >0.9999 |
| TNFa vs. Butyrate | 100pg/mL vs. 7500µM    | -63.83 No   | ns | >0.9999 |
| TNFa vs. Combo    | 100pg/mL vs. 50pg/mL   | -51.33 No   | ns | >0.9999 |
| TNFa vs. Combo    | 100pg/mL vs. 100pg/mL  | 2.583 No    | ns | >0.9999 |
| TNFa vs. Combo    | 100pg/mL vs. 150pg/mL  | 6.833 No    | ns | >0.9999 |
| TNFa vs. Combo    | 100pg/mL vs. 200pg/mL  | -117 Yes    | *  | 0.0437  |
| TNFa vs. Combo    | 100pg/mL vs. 250pg/mL  | -115.2 No   | ns | 0.0561  |
| TNFa vs. Combo    | 100pg/mL vs. 500pg/mL  | -113.5 No   | ns | 0.0702  |
| TNFa vs. Combo    | 100pg/mL vs. 1000pg/mL | -92.25 No   | ns | 0.9421  |
| TNFa vs. Combo    | 100pg/mL vs. 2500pg/mL | -86.33 No   | ns | >0.9999 |
| TNFa vs. Combo    | 100pg/mL vs. 5000pg/mL | -79.17 No   | ns | >0.9999 |
| TNFa vs. TNFa     | 150pg/mL vs. 200pg/mL  | -15.75 No   | ns | >0.9999 |
| TNFa vs. TNFa     | 150pg/mL vs. 250pg/mL  | 12.25 No    | ns | >0.9999 |
| TNFa vs. TNFa     | 150pg/mL vs. 500pg/mL  | -1.25 No    | ns | >0.9999 |
| TNFa vs. TNFa     | 150pg/mL vs. 1000pg/mL | -108.9 No   | ns | 0.1279  |
| TNFa vs. TNFa     | 150pg/mL vs. 2500pg/mL | -70.92 No   | ns | >0.9999 |
| TNFa vs. TNFa     | 150pg/mL vs. 5000pg/mL | -35.58 No   | ns | >0.9999 |
| TNFa vs. Butyrate | 150pg/mL vs. 50µM      | -57.75 No   | ns | >0.9999 |
| TNFa vs. Butyrate | 150pg/mL vs. 75µM      | -33.42 No   | ns | >0.9999 |
| TNFa vs. Butyrate | 150pg/mL vs. 100µM     | -25.08 No   | ns | >0.9999 |
| TNFa vs. Butyrate | 150pg/mL vs. 250µM     | 10.42 No    | ns | >0.9999 |
| TNFa vs. Butyrate | 150pg/mL vs. 500µM     | -44.42 No   | ns | >0.9999 |
| TNFa vs. Butyrate | 150pg/mL vs. 750µM     | -120.8 Yes  | *  | 0.026   |
| TNFa vs. Butyrate | 150pg/mL vs. 1000µM    | -115.1 No   | ns | 0.0568  |
| TNFa vs. Butyrate | 150pg/mL vs. 2500µM    | -102.5 No   | ns | 0.2855  |
| TNFa vs. Butyrate | 150pg/mL vs. 5000µM    | -98.58 No   | ns | 0.4563  |
| TNFa vs. Butyrate | 150pg/mL vs. 7500µM    | -70.75 No   | ns | >0.9999 |
| TNFa vs. Combo    | 150pg/mL vs. 50pg/mL   | -58.25 No   | ns | >0.9999 |
| TNFa vs. Combo    | 150pg/mL vs. 100pg/mL  | -4.333 No   | ns | >0.9999 |
| TNFa vs. Combo    | 150pg/mL vs. 150pg/mL  | -0.08333 No | ns | >0.9999 |
| TNFa vs. Combo    | 150pg/mL vs. 200pg/mL  | -123.9 Yes  | *  | 0.0165  |
| TNFa vs. Combo    | 150pg/mL vs. 250pg/mL  | -122.1 Yes  | *  | 0.0215  |
| TNFa vs. Combo    | 150pg/mL vs. 500pg/mL  | -120.4 Yes  | *  | 0.0272  |
| TNFa vs. Combo    | 150pg/mL vs. 1000pg/mL | -99.17 No   | ns | 0.426   |
| TNFa vs. Combo    | 150pg/mL vs. 2500pg/mL | -93.25 No   | ns | 0.8426  |
| TNFa vs. Combo    | 150pg/mL vs. 5000pg/mL | -86.08 No   | ns | >0.9999 |
| TNFa vs. TNFa     | 200pg/mL vs. 250pg/mL  | 28 No       | ns | >0.9999 |
| TNFa vs. TNFa     | 200pg/mL vs. 500pg/mL  | 14.5 No     | ns | >0.9999 |
| TNFa vs. TNFa     | 200pg/mL vs. 1000pg/mL | -93.17 No   | ns | 0.8505  |
| TNFa vs. TNFa     | 200pg/mL vs. 2500pg/mL | -55.17 No   | ns | >0.9999 |
| TNFa vs. TNFa     | 200pg/mL vs. 5000pg/mL | -19.83 No   | ns | >0.9999 |

|                   |                        |            |    |         |
|-------------------|------------------------|------------|----|---------|
| TNFa vs. Butyrate | 200pg/mL vs. 50µM      | -42 No     | ns | >0.9999 |
| TNFa vs. Butyrate | 200pg/mL vs. 75µM      | -17.67 No  | ns | >0.9999 |
| TNFa vs. Butyrate | 200pg/mL vs. 100µM     | -9.333 No  | ns | >0.9999 |
| TNFa vs. Butyrate | 200pg/mL vs. 250µM     | 26.17 No   | ns | >0.9999 |
| TNFa vs. Butyrate | 200pg/mL vs. 500µM     | -28.67 No  | ns | >0.9999 |
| TNFa vs. Butyrate | 200pg/mL vs. 750µM     | -105 No    | ns | 0.2099  |
| TNFa vs. Butyrate | 200pg/mL vs. 1000µM    | -99.33 No  | ns | 0.4177  |
| TNFa vs. Butyrate | 200pg/mL vs. 2500µM    | -86.75 No  | ns | >0.9999 |
| TNFa vs. Butyrate | 200pg/mL vs. 5000µM    | -82.83 No  | ns | >0.9999 |
| TNFa vs. Butyrate | 200pg/mL vs. 7500µM    | -55 No     | ns | >0.9999 |
| TNFa vs. Combo    | 200pg/mL vs. 50pg/mL   | -42.5 No   | ns | >0.9999 |
| TNFa vs. Combo    | 200pg/mL vs. 100pg/mL  | 11.42 No   | ns | >0.9999 |
| TNFa vs. Combo    | 200pg/mL vs. 150pg/mL  | 15.67 No   | ns | >0.9999 |
| TNFa vs. Combo    | 200pg/mL vs. 200pg/mL  | -108.2 No  | ns | 0.1408  |
| TNFa vs. Combo    | 200pg/mL vs. 250pg/mL  | -106.3 No  | ns | 0.1776  |
| TNFa vs. Combo    | 200pg/mL vs. 500pg/mL  | -104.7 No  | ns | 0.2187  |
| TNFa vs. Combo    | 200pg/mL vs. 1000pg/mL | -83.42 No  | ns | >0.9999 |
| TNFa vs. Combo    | 200pg/mL vs. 2500pg/mL | -77.5 No   | ns | >0.9999 |
| TNFa vs. Combo    | 200pg/mL vs. 5000pg/mL | -70.33 No  | ns | >0.9999 |
| TNFa vs. TNFa     | 250pg/mL vs. 500pg/mL  | -13.5 No   | ns | >0.9999 |
| TNFa vs. TNFa     | 250pg/mL vs. 1000pg/mL | -121.2 Yes | *  | 0.0245  |
| TNFa vs. TNFa     | 250pg/mL vs. 2500pg/mL | -83.17 No  | ns | >0.9999 |
| TNFa vs. TNFa     | 250pg/mL vs. 5000pg/mL | -47.83 No  | ns | >0.9999 |
| TNFa vs. Butyrate | 250pg/mL vs. 50µM      | -70 No     | ns | >0.9999 |
| TNFa vs. Butyrate | 250pg/mL vs. 75µM      | -45.67 No  | ns | >0.9999 |
| TNFa vs. Butyrate | 250pg/mL vs. 100µM     | -37.33 No  | ns | >0.9999 |
| TNFa vs. Butyrate | 250pg/mL vs. 250µM     | -1.833 No  | ns | >0.9999 |
| TNFa vs. Butyrate | 250pg/mL vs. 500µM     | -56.67 No  | ns | >0.9999 |
| TNFa vs. Butyrate | 250pg/mL vs. 750µM     | -133 Yes   | ** | 0.0043  |
| TNFa vs. Butyrate | 250pg/mL vs. 1000µM    | -127.3 Yes | *  | 0.01    |
| TNFa vs. Butyrate | 250pg/mL vs. 2500µM    | -114.8 No  | ns | 0.0594  |
| TNFa vs. Butyrate | 250pg/mL vs. 5000µM    | -110.8 No  | ns | 0.0998  |
| TNFa vs. Butyrate | 250pg/mL vs. 7500µM    | -83 No     | ns | >0.9999 |
| TNFa vs. Combo    | 250pg/mL vs. 50pg/mL   | -70.5 No   | ns | >0.9999 |
| TNFa vs. Combo    | 250pg/mL vs. 100pg/mL  | -16.58 No  | ns | >0.9999 |
| TNFa vs. Combo    | 250pg/mL vs. 150pg/mL  | -12.33 No  | ns | >0.9999 |
| TNFa vs. Combo    | 250pg/mL vs. 200pg/mL  | -136.2 Yes | ** | 0.0026  |
| TNFa vs. Combo    | 250pg/mL vs. 250pg/mL  | -134.3 Yes | ** | 0.0035  |
| TNFa vs. Combo    | 250pg/mL vs. 500pg/mL  | -132.7 Yes | ** | 0.0045  |
| TNFa vs. Combo    | 250pg/mL vs. 1000pg/mL | -111.4 No  | ns | 0.0925  |
| TNFa vs. Combo    | 250pg/mL vs. 2500pg/mL | -105.5 No  | ns | 0.1972  |
| TNFa vs. Combo    | 250pg/mL vs. 5000pg/mL | -98.33 No  | ns | 0.47    |
| TNFa vs. TNFa     | 500pg/mL vs. 1000pg/mL | -107.7 No  | ns | 0.1501  |
| TNFa vs. TNFa     | 500pg/mL vs. 2500pg/mL | -69.67 No  | ns | >0.9999 |
| TNFa vs. TNFa     | 500pg/mL vs. 5000pg/mL | -34.33 No  | ns | >0.9999 |
| TNFa vs. Butyrate | 500pg/mL vs. 50µM      | -56.5 No   | ns | >0.9999 |
| TNFa vs. Butyrate | 500pg/mL vs. 75µM      | -32.17 No  | ns | >0.9999 |

|                   |                         |            |    |         |
|-------------------|-------------------------|------------|----|---------|
| TNFa vs. Butyrate | 500pg/mL vs. 100µM      | -23.83 No  | ns | >0.9999 |
| TNFa vs. Butyrate | 500pg/mL vs. 250µM      | 11.67 No   | ns | >0.9999 |
| TNFa vs. Butyrate | 500pg/mL vs. 500µM      | -43.17 No  | ns | >0.9999 |
| TNFa vs. Butyrate | 500pg/mL vs. 750µM      | -119.5 Yes | *  | 0.031   |
| TNFa vs. Butyrate | 500pg/mL vs. 1000µM     | -113.8 No  | ns | 0.0671  |
| TNFa vs. Butyrate | 500pg/mL vs. 2500µM     | -101.3 No  | ns | 0.3322  |
| TNFa vs. Butyrate | 500pg/mL vs. 5000µM     | -97.33 No  | ns | 0.5283  |
| TNFa vs. Butyrate | 500pg/mL vs. 7500µM     | -69.5 No   | ns | >0.9999 |
| TNFa vs. Combo    | 500pg/mL vs. 50pg/mL    | -57 No     | ns | >0.9999 |
| TNFa vs. Combo    | 500pg/mL vs. 100pg/mL   | -3.083 No  | ns | >0.9999 |
| TNFa vs. Combo    | 500pg/mL vs. 150pg/mL   | 1.167 No   | ns | >0.9999 |
| TNFa vs. Combo    | 500pg/mL vs. 200pg/mL   | -122.7 Yes | *  | 0.0198  |
| TNFa vs. Combo    | 500pg/mL vs. 250pg/mL   | -120.8 Yes | *  | 0.0257  |
| TNFa vs. Combo    | 500pg/mL vs. 500pg/mL   | -119.2 Yes | *  | 0.0324  |
| TNFa vs. Combo    | 500pg/mL vs. 1000pg/mL  | -97.92 No  | ns | 0.4935  |
| TNFa vs. Combo    | 500pg/mL vs. 2500pg/mL  | -92 No     | ns | 0.9687  |
| TNFa vs. Combo    | 500pg/mL vs. 5000pg/mL  | -84.83 No  | ns | >0.9999 |
| TNFa vs. TNFa     | 1000pg/mL vs. 2500pg/mL | 38 No      | ns | >0.9999 |
| TNFa vs. TNFa     | 1000pg/mL vs. 5000pg/mL | 73.33 No   | ns | >0.9999 |
| TNFa vs. Butyrate | 1000pg/mL vs. 50µM      | 51.17 No   | ns | >0.9999 |
| TNFa vs. Butyrate | 1000pg/mL vs. 75µM      | 75.5 No    | ns | >0.9999 |
| TNFa vs. Butyrate | 1000pg/mL vs. 100µM     | 83.83 No   | ns | >0.9999 |
| TNFa vs. Butyrate | 1000pg/mL vs. 250µM     | 119.3 Yes  | *  | 0.0317  |
| TNFa vs. Butyrate | 1000pg/mL vs. 500µM     | 64.5 No    | ns | >0.9999 |
| TNFa vs. Butyrate | 1000pg/mL vs. 750µM     | -11.83 No  | ns | >0.9999 |
| TNFa vs. Butyrate | 1000pg/mL vs. 1000µM    | -6.167 No  | ns | >0.9999 |
| TNFa vs. Butyrate | 1000pg/mL vs. 2500µM    | 6.417 No   | ns | >0.9999 |
| TNFa vs. Butyrate | 1000pg/mL vs. 5000µM    | 10.33 No   | ns | >0.9999 |
| TNFa vs. Butyrate | 1000pg/mL vs. 7500µM    | 38.17 No   | ns | >0.9999 |
| TNFa vs. Combo    | 1000pg/mL vs. 50pg/mL   | 50.67 No   | ns | >0.9999 |
| TNFa vs. Combo    | 1000pg/mL vs. 100pg/mL  | 104.6 No   | ns | 0.221   |
| TNFa vs. Combo    | 1000pg/mL vs. 150pg/mL  | 108.8 No   | ns | 0.1293  |
| TNFa vs. Combo    | 1000pg/mL vs. 200pg/mL  | -15 No     | ns | >0.9999 |
| TNFa vs. Combo    | 1000pg/mL vs. 250pg/mL  | -13.17 No  | ns | >0.9999 |
| TNFa vs. Combo    | 1000pg/mL vs. 500pg/mL  | -11.5 No   | ns | >0.9999 |
| TNFa vs. Combo    | 1000pg/mL vs. 1000pg/mL | 9.75 No    | ns | >0.9999 |
| TNFa vs. Combo    | 1000pg/mL vs. 2500pg/mL | 15.67 No   | ns | >0.9999 |
| TNFa vs. Combo    | 1000pg/mL vs. 5000pg/mL | 22.83 No   | ns | >0.9999 |
| TNFa vs. TNFa     | 2500pg/mL vs. 5000pg/mL | 35.33 No   | ns | >0.9999 |
| TNFa vs. Butyrate | 2500pg/mL vs. 50µM      | 13.17 No   | ns | >0.9999 |
| TNFa vs. Butyrate | 2500pg/mL vs. 75µM      | 37.5 No    | ns | >0.9999 |
| TNFa vs. Butyrate | 2500pg/mL vs. 100µM     | 45.83 No   | ns | >0.9999 |
| TNFa vs. Butyrate | 2500pg/mL vs. 250µM     | 81.33 No   | ns | >0.9999 |
| TNFa vs. Butyrate | 2500pg/mL vs. 500µM     | 26.5 No    | ns | >0.9999 |
| TNFa vs. Butyrate | 2500pg/mL vs. 750µM     | -49.83 No  | ns | >0.9999 |
| TNFa vs. Butyrate | 2500pg/mL vs. 1000µM    | -44.17 No  | ns | >0.9999 |
| TNFa vs. Butyrate | 2500pg/mL vs. 2500µM    | -31.58 No  | ns | >0.9999 |

|                       |                         |        |    |    |         |
|-----------------------|-------------------------|--------|----|----|---------|
| TNFa vs. Butyrate     | 2500pg/mL vs. 5000μM    | -27.67 | No | ns | >0.9999 |
| TNFa vs. Butyrate     | 2500pg/mL vs. 7500μM    | 0.1667 | No | ns | >0.9999 |
| TNFa vs. Combo        | 2500pg/mL vs. 50pg/mL   | 12.67  | No | ns | >0.9999 |
| TNFa vs. Combo        | 2500pg/mL vs. 100pg/mL  | 66.58  | No | ns | >0.9999 |
| TNFa vs. Combo        | 2500pg/mL vs. 150pg/mL  | 70.83  | No | ns | >0.9999 |
| TNFa vs. Combo        | 2500pg/mL vs. 200pg/mL  | -53    | No | ns | >0.9999 |
| TNFa vs. Combo        | 2500pg/mL vs. 250pg/mL  | -51.17 | No | ns | >0.9999 |
| TNFa vs. Combo        | 2500pg/mL vs. 500pg/mL  | -49.5  | No | ns | >0.9999 |
| TNFa vs. Combo        | 2500pg/mL vs. 1000pg/mL | -28.25 | No | ns | >0.9999 |
| TNFa vs. Combo        | 2500pg/mL vs. 2500pg/mL | -22.33 | No | ns | >0.9999 |
| TNFa vs. Combo        | 2500pg/mL vs. 5000pg/mL | -15.17 | No | ns | >0.9999 |
| TNFa vs. Butyrate     | 5000pg/mL vs. 50μM      | -22.17 | No | ns | >0.9999 |
| TNFa vs. Butyrate     | 5000pg/mL vs. 75μM      | 2.167  | No | ns | >0.9999 |
| TNFa vs. Butyrate     | 5000pg/mL vs. 100μM     | 10.5   | No | ns | >0.9999 |
| TNFa vs. Butyrate     | 5000pg/mL vs. 250μM     | 46     | No | ns | >0.9999 |
| TNFa vs. Butyrate     | 5000pg/mL vs. 500μM     | -8.833 | No | ns | >0.9999 |
| TNFa vs. Butyrate     | 5000pg/mL vs. 750μM     | -85.17 | No | ns | >0.9999 |
| TNFa vs. Butyrate     | 5000pg/mL vs. 1000μM    | -79.5  | No | ns | >0.9999 |
| TNFa vs. Butyrate     | 5000pg/mL vs. 2500μM    | -66.92 | No | ns | >0.9999 |
| TNFa vs. Butyrate     | 5000pg/mL vs. 5000μM    | -63    | No | ns | >0.9999 |
| TNFa vs. Butyrate     | 5000pg/mL vs. 7500μM    | -35.17 | No | ns | >0.9999 |
| TNFa vs. Combo        | 5000pg/mL vs. 50pg/mL   | -22.67 | No | ns | >0.9999 |
| TNFa vs. Combo        | 5000pg/mL vs. 100pg/mL  | 31.25  | No | ns | >0.9999 |
| TNFa vs. Combo        | 5000pg/mL vs. 150pg/mL  | 35.5   | No | ns | >0.9999 |
| TNFa vs. Combo        | 5000pg/mL vs. 200pg/mL  | -88.33 | No | ns | >0.9999 |
| TNFa vs. Combo        | 5000pg/mL vs. 250pg/mL  | -86.5  | No | ns | >0.9999 |
| TNFa vs. Combo        | 5000pg/mL vs. 500pg/mL  | -84.83 | No | ns | >0.9999 |
| TNFa vs. Combo        | 5000pg/mL vs. 1000pg/mL | -63.58 | No | ns | >0.9999 |
| TNFa vs. Combo        | 5000pg/mL vs. 2500pg/mL | -57.67 | No | ns | >0.9999 |
| TNFa vs. Combo        | 5000pg/mL vs. 5000pg/mL | -50.5  | No | ns | >0.9999 |
| Butyrate vs. Butyrate | 50μM vs. 75μM           | 24.33  | No | ns | >0.9999 |
| Butyrate vs. Butyrate | 50μM vs. 100μM          | 32.67  | No | ns | >0.9999 |
| Butyrate vs. Butyrate | 50μM vs. 250μM          | 68.17  | No | ns | >0.9999 |
| Butyrate vs. Butyrate | 50μM vs. 500μM          | 13.33  | No | ns | >0.9999 |
| Butyrate vs. Butyrate | 50μM vs. 750μM          | -63    | No | ns | >0.9999 |
| Butyrate vs. Butyrate | 50μM vs. 1000μM         | -57.33 | No | ns | >0.9999 |
| Butyrate vs. Butyrate | 50μM vs. 2500μM         | -44.75 | No | ns | >0.9999 |
| Butyrate vs. Butyrate | 50μM vs. 5000μM         | -40.83 | No | ns | >0.9999 |
| Butyrate vs. Butyrate | 50μM vs. 7500μM         | -13    | No | ns | >0.9999 |
| Butyrate + Combo      | 50μM vs. 50pg/mL        | -0.5   | No | ns | >0.9999 |
| Butyrate + Combo      | 50μM vs. 100pg/mL       | 53.42  | No | ns | >0.9999 |
| Butyrate + Combo      | 50μM vs. 150pg/mL       | 57.67  | No | ns | >0.9999 |
| Butyrate + Combo      | 50μM vs. 200pg/mL       | -66.17 | No | ns | >0.9999 |
| Butyrate + Combo      | 50μM vs. 250pg/mL       | -64.33 | No | ns | >0.9999 |
| Butyrate + Combo      | 50μM vs. 500pg/mL       | -62.67 | No | ns | >0.9999 |
| Butyrate + Combo      | 50μM vs. 1000pg/mL      | -41.42 | No | ns | >0.9999 |
| Butyrate + Combo      | 50μM vs. 2500pg/mL      | -35.5  | No | ns | >0.9999 |

|                       |                     |            |    |         |
|-----------------------|---------------------|------------|----|---------|
| Butyrate + Combo      | 50µM vs. 5000pg/mL  | -28.33 No  | ns | >0.9999 |
| Butyrate vs. Butyrate | 75µM vs. 100µM      | 8.333 No   | ns | >0.9999 |
| Butyrate vs. Butyrate | 75µM vs. 250µM      | 43.83 No   | ns | >0.9999 |
| Butyrate vs. Butyrate | 75µM vs. 500µM      | -11 No     | ns | >0.9999 |
| Butyrate vs. Butyrate | 75µM vs. 750µM      | -87.33 No  | ns | >0.9999 |
| Butyrate vs. Butyrate | 75µM vs. 1000µM     | -81.67 No  | ns | >0.9999 |
| Butyrate vs. Butyrate | 75µM vs. 2500µM     | -69.08 No  | ns | >0.9999 |
| Butyrate vs. Butyrate | 75µM vs. 5000µM     | -65.17 No  | ns | >0.9999 |
| Butyrate vs. Butyrate | 75µM vs. 7500µM     | -37.33 No  | ns | >0.9999 |
| Butyrate + Combo      | 75µM vs. 50pg/mL    | -24.83 No  | ns | >0.9999 |
| Butyrate + Combo      | 75µM vs. 100pg/mL   | 29.08 No   | ns | >0.9999 |
| Butyrate + Combo      | 75µM vs. 150pg/mL   | 33.33 No   | ns | >0.9999 |
| Butyrate + Combo      | 75µM vs. 200pg/mL   | -90.5 No   | ns | >0.9999 |
| Butyrate + Combo      | 75µM vs. 250pg/mL   | -88.67 No  | ns | >0.9999 |
| Butyrate + Combo      | 75µM vs. 500pg/mL   | -87 No     | ns | >0.9999 |
| Butyrate + Combo      | 75µM vs. 1000pg/mL  | -65.75 No  | ns | >0.9999 |
| Butyrate + Combo      | 75µM vs. 2500pg/mL  | -59.83 No  | ns | >0.9999 |
| Butyrate + Combo      | 75µM vs. 5000pg/mL  | -52.67 No  | ns | >0.9999 |
| Butyrate vs. Butyrate | 100µM vs. 250µM     | 35.5 No    | ns | >0.9999 |
| Butyrate vs. Butyrate | 100µM vs. 500µM     | -19.33 No  | ns | >0.9999 |
| Butyrate vs. Butyrate | 100µM vs. 750µM     | -95.67 No  | ns | 0.6405  |
| Butyrate vs. Butyrate | 100µM vs. 1000µM    | -90 No     | ns | >0.9999 |
| Butyrate vs. Butyrate | 100µM vs. 2500µM    | -77.42 No  | ns | >0.9999 |
| Butyrate vs. Butyrate | 100µM vs. 5000µM    | -73.5 No   | ns | >0.9999 |
| Butyrate vs. Butyrate | 100µM vs. 7500µM    | -45.67 No  | ns | >0.9999 |
| Butyrate + Combo      | 100µM vs. 50pg/mL   | -33.17 No  | ns | >0.9999 |
| Butyrate + Combo      | 100µM vs. 100pg/mL  | 20.75 No   | ns | >0.9999 |
| Butyrate + Combo      | 100µM vs. 150pg/mL  | 25 No      | ns | >0.9999 |
| Butyrate + Combo      | 100µM vs. 200pg/mL  | -98.83 No  | ns | 0.4431  |
| Butyrate + Combo      | 100µM vs. 250pg/mL  | -97 No     | ns | 0.5491  |
| Butyrate + Combo      | 100µM vs. 500pg/mL  | -95.33 No  | ns | 0.6654  |
| Butyrate + Combo      | 100µM vs. 1000pg/mL | -74.08 No  | ns | >0.9999 |
| Butyrate + Combo      | 100µM vs. 2500pg/mL | -68.17 No  | ns | >0.9999 |
| Butyrate + Combo      | 100µM vs. 5000pg/mL | -61 No     | ns | >0.9999 |
| Butyrate vs. Butyrate | 250µM vs. 500µM     | -54.83 No  | ns | >0.9999 |
| Butyrate vs. Butyrate | 250µM vs. 750µM     | -131.2 Yes | ** | 0.0057  |
| Butyrate vs. Butyrate | 250µM vs. 1000µM    | -125.5 Yes | *  | 0.0131  |
| Butyrate vs. Butyrate | 250µM vs. 2500µM    | -112.9 No  | ns | 0.0759  |
| Butyrate vs. Butyrate | 250µM vs. 5000µM    | -109 No    | ns | 0.1265  |
| Butyrate vs. Butyrate | 250µM vs. 7500µM    | -81.17 No  | ns | >0.9999 |
| Butyrate + Combo      | 250µM vs. 50pg/mL   | -68.67 No  | ns | >0.9999 |
| Butyrate + Combo      | 250µM vs. 100pg/mL  | -14.75 No  | ns | >0.9999 |
| Butyrate + Combo      | 250µM vs. 150pg/mL  | -10.5 No   | ns | >0.9999 |
| Butyrate + Combo      | 250µM vs. 200pg/mL  | -134.3 Yes | ** | 0.0035  |
| Butyrate + Combo      | 250µM vs. 250pg/mL  | -132.5 Yes | ** | 0.0046  |
| Butyrate + Combo      | 250µM vs. 500pg/mL  | -130.8 Yes | ** | 0.0059  |
| Butyrate + Combo      | 250µM vs. 1000pg/mL | -109.6 No  | ns | 0.1174  |

|                       |                      |           |    |         |
|-----------------------|----------------------|-----------|----|---------|
| Butyrate + Combo      | 250µM vs. 2500pg/mL  | -103.7 No | ns | 0.2475  |
| Butyrate + Combo      | 250µM vs. 5000pg/mL  | -96.5 No  | ns | 0.5819  |
| Butyrate vs. Butyrate | 500µM vs. 750µM      | -76.33 No | ns | >0.9999 |
| Butyrate vs. Butyrate | 500µM vs. 1000µM     | -70.67 No | ns | >0.9999 |
| Butyrate vs. Butyrate | 500µM vs. 2500µM     | -58.08 No | ns | >0.9999 |
| Butyrate vs. Butyrate | 500µM vs. 5000µM     | -54.17 No | ns | >0.9999 |
| Butyrate vs. Butyrate | 500µM vs. 7500µM     | -26.33 No | ns | >0.9999 |
| Butyrate + Combo      | 500µM vs. 50pg/mL    | -13.83 No | ns | >0.9999 |
| Butyrate + Combo      | 500µM vs. 100pg/mL   | 40.08 No  | ns | >0.9999 |
| Butyrate + Combo      | 500µM vs. 150pg/mL   | 44.33 No  | ns | >0.9999 |
| Butyrate + Combo      | 500µM vs. 200pg/mL   | -79.5 No  | ns | >0.9999 |
| Butyrate + Combo      | 500µM vs. 250pg/mL   | -77.67 No | ns | >0.9999 |
| Butyrate + Combo      | 500µM vs. 500pg/mL   | -76 No    | ns | >0.9999 |
| Butyrate + Combo      | 500µM vs. 1000pg/mL  | -54.75 No | ns | >0.9999 |
| Butyrate + Combo      | 500µM vs. 2500pg/mL  | -48.83 No | ns | >0.9999 |
| Butyrate + Combo      | 500µM vs. 5000pg/mL  | -41.67 No | ns | >0.9999 |
| Butyrate vs. Butyrate | 750µM vs. 1000µM     | 5.667 No  | ns | >0.9999 |
| Butyrate vs. Butyrate | 750µM vs. 2500µM     | 18.25 No  | ns | >0.9999 |
| Butyrate vs. Butyrate | 750µM vs. 5000µM     | 22.17 No  | ns | >0.9999 |
| Butyrate vs. Butyrate | 750µM vs. 7500µM     | 50 No     | ns | >0.9999 |
| Butyrate + Combo      | 750µM vs. 50pg/mL    | 62.5 No   | ns | >0.9999 |
| Butyrate + Combo      | 750µM vs. 100pg/mL   | 116.4 Yes | *  | 0.0474  |
| Butyrate + Combo      | 750µM vs. 150pg/mL   | 120.7 Yes | *  | 0.0263  |
| Butyrate + Combo      | 750µM vs. 200pg/mL   | -3.167 No | ns | >0.9999 |
| Butyrate + Combo      | 750µM vs. 250pg/mL   | -1.333 No | ns | >0.9999 |
| Butyrate + Combo      | 750µM vs. 500pg/mL   | 0.3333 No | ns | >0.9999 |
| Butyrate + Combo      | 750µM vs. 1000pg/mL  | 21.58 No  | ns | >0.9999 |
| Butyrate + Combo      | 750µM vs. 2500pg/mL  | 27.5 No   | ns | >0.9999 |
| Butyrate + Combo      | 750µM vs. 5000pg/mL  | 34.67 No  | ns | >0.9999 |
| Butyrate vs. Butyrate | 1000µM vs. 2500µM    | 12.58 No  | ns | >0.9999 |
| Butyrate vs. Butyrate | 1000µM vs. 5000µM    | 16.5 No   | ns | >0.9999 |
| Butyrate vs. Butyrate | 1000µM vs. 7500µM    | 44.33 No  | ns | >0.9999 |
| Butyrate + Combo      | 1000µM vs. 50pg/mL   | 56.83 No  | ns | >0.9999 |
| Butyrate + Combo      | 1000µM vs. 100pg/mL  | 110.8 No  | ns | 0.1009  |
| Butyrate + Combo      | 1000µM vs. 150pg/mL  | 115 No    | ns | 0.0574  |
| Butyrate + Combo      | 1000µM vs. 200pg/mL  | -8.833 No | ns | >0.9999 |
| Butyrate + Combo      | 1000µM vs. 250pg/mL  | -7 No     | ns | >0.9999 |
| Butyrate + Combo      | 1000µM vs. 500pg/mL  | -5.333 No | ns | >0.9999 |
| Butyrate + Combo      | 1000µM vs. 1000pg/mL | 15.92 No  | ns | >0.9999 |
| Butyrate + Combo      | 1000µM vs. 2500pg/mL | 21.83 No  | ns | >0.9999 |
| Butyrate + Combo      | 1000µM vs. 5000pg/mL | 29 No     | ns | >0.9999 |
| Butyrate vs. Butyrate | 2500µM vs. 5000µM    | 3.917 No  | ns | >0.9999 |
| Butyrate vs. Butyrate | 2500µM vs. 7500µM    | 31.75 No  | ns | >0.9999 |
| Butyrate + Combo      | 2500µM vs. 50pg/mL   | 44.25 No  | ns | >0.9999 |
| Butyrate + Combo      | 2500µM vs. 100pg/mL  | 98.17 No  | ns | 0.4792  |
| Butyrate + Combo      | 2500µM vs. 150pg/mL  | 102.4 No  | ns | 0.2884  |
| Butyrate + Combo      | 2500µM vs. 200pg/mL  | -21.42 No | ns | >0.9999 |

|                       |                        |            |    |         |
|-----------------------|------------------------|------------|----|---------|
| Butyrate + Combo      | 2500μM vs. 250pg/mL    | -19.58 No  | ns | >0.9999 |
| Butyrate + Combo      | 2500μM vs. 500pg/mL    | -17.92 No  | ns | >0.9999 |
| Butyrate + Combo      | 2500μM vs. 1000pg/mL   | 3.333 No   | ns | >0.9999 |
| Butyrate + Combo      | 2500μM vs. 2500pg/mL   | 9.25 No    | ns | >0.9999 |
| Butyrate + Combo      | 2500μM vs. 5000pg/mL   | 16.42 No   | ns | >0.9999 |
| Butyrate vs. Butyrate | 5000μM vs. 7500μM      | 27.83 No   | ns | >0.9999 |
| Butyrate + Combo      | 5000μM vs. 50pg/mL     | 40.33 No   | ns | >0.9999 |
| Butyrate + Combo      | 5000μM vs. 100pg/mL    | 94.25 No   | ns | 0.7527  |
| Butyrate + Combo      | 5000μM vs. 150pg/mL    | 98.5 No    | ns | 0.4608  |
| Butyrate + Combo      | 5000μM vs. 200pg/mL    | -25.33 No  | ns | >0.9999 |
| Butyrate + Combo      | 5000μM vs. 250pg/mL    | -23.5 No   | ns | >0.9999 |
| Butyrate + Combo      | 5000μM vs. 500pg/mL    | -21.83 No  | ns | >0.9999 |
| Butyrate + Combo      | 5000μM vs. 1000pg/mL   | -0.5833 No | ns | >0.9999 |
| Butyrate + Combo      | 5000μM vs. 2500pg/mL   | 5.333 No   | ns | >0.9999 |
| Butyrate + Combo      | 5000μM vs. 5000pg/mL   | 12.5 No    | ns | >0.9999 |
| Butyrate + Combo      | 7500μM vs. 50pg/mL     | 12.5 No    | ns | >0.9999 |
| Butyrate + Combo      | 7500μM vs. 100pg/mL    | 66.42 No   | ns | >0.9999 |
| Butyrate + Combo      | 7500μM vs. 150pg/mL    | 70.67 No   | ns | >0.9999 |
| Butyrate + Combo      | 7500μM vs. 200pg/mL    | -53.17 No  | ns | >0.9999 |
| Butyrate + Combo      | 7500μM vs. 250pg/mL    | -51.33 No  | ns | >0.9999 |
| Butyrate + Combo      | 7500μM vs. 500pg/mL    | -49.67 No  | ns | >0.9999 |
| Butyrate + Combo      | 7500μM vs. 1000pg/mL   | -28.42 No  | ns | >0.9999 |
| Butyrate + Combo      | 7500μM vs. 2500pg/mL   | -22.5 No   | ns | >0.9999 |
| Butyrate + Combo      | 7500μM vs. 5000pg/mL   | -15.33 No  | ns | >0.9999 |
| Combo vs. Combo       | 50pg/mL vs. 100pg/mL   | 53.92 No   | ns | >0.9999 |
| Combo vs. Combo       | 50pg/mL vs. 150pg/mL   | 58.17 No   | ns | >0.9999 |
| Combo vs. Combo       | 50pg/mL vs. 200pg/mL   | -65.67 No  | ns | >0.9999 |
| Combo vs. Combo       | 50pg/mL vs. 250pg/mL   | -63.83 No  | ns | >0.9999 |
| Combo vs. Combo       | 50pg/mL vs. 500pg/mL   | -62.17 No  | ns | >0.9999 |
| Combo vs. Combo       | 50pg/mL vs. 1000pg/mL  | -40.92 No  | ns | >0.9999 |
| Combo vs. Combo       | 50pg/mL vs. 2500pg/mL  | -35 No     | ns | >0.9999 |
| Combo vs. Combo       | 50pg/mL vs. 5000pg/mL  | -27.83 No  | ns | >0.9999 |
| Combo vs. Combo       | 100pg/mL vs. 150pg/mL  | 4.25 No    | ns | >0.9999 |
| Combo vs. Combo       | 100pg/mL vs. 200pg/mL  | -119.6 Yes | *  | 0.0306  |
| Combo vs. Combo       | 100pg/mL vs. 250pg/mL  | -117.8 Yes | *  | 0.0395  |
| Combo vs. Combo       | 100pg/mL vs. 500pg/mL  | -116.1 Yes | *  | 0.0496  |
| Combo vs. Combo       | 100pg/mL vs. 1000pg/mL | -94.83 No  | ns | 0.7045  |
| Combo vs. Combo       | 100pg/mL vs. 2500pg/mL | -88.92 No  | ns | >0.9999 |
| Combo vs. Combo       | 100pg/mL vs. 5000pg/mL | -81.75 No  | ns | >0.9999 |
| Combo vs. Combo       | 150pg/mL vs. 200pg/mL  | -123.8 Yes | *  | 0.0167  |
| Combo vs. Combo       | 150pg/mL vs. 250pg/mL  | -122 Yes   | *  | 0.0218  |
| Combo vs. Combo       | 150pg/mL vs. 500pg/mL  | -120.3 Yes | *  | 0.0276  |
| Combo vs. Combo       | 150pg/mL vs. 1000pg/mL | -99.08 No  | ns | 0.4302  |
| Combo vs. Combo       | 150pg/mL vs. 2500pg/mL | -93.17 No  | ns | 0.8505  |
| Combo vs. Combo       | 150pg/mL vs. 5000pg/mL | -86 No     | ns | >0.9999 |
| Combo vs. Combo       | 200pg/mL vs. 250pg/mL  | 1.833 No   | ns | >0.9999 |
| Combo vs. Combo       | 200pg/mL vs. 500pg/mL  | 3.5 No     | ns | >0.9999 |

|                 |                         |       |    |    |         |
|-----------------|-------------------------|-------|----|----|---------|
| Combo vs. Combo | 200pg/mL vs. 1000pg/mL  | 24.75 | No | ns | >0.9999 |
| Combo vs. Combo | 200pg/mL vs. 2500pg/mL  | 30.67 | No | ns | >0.9999 |
| Combo vs. Combo | 200pg/mL vs. 5000pg/mL  | 37.83 | No | ns | >0.9999 |
| Combo vs. Combo | 250pg/mL vs. 500pg/mL   | 1.667 | No | ns | >0.9999 |
| Combo vs. Combo | 250pg/mL vs. 1000pg/mL  | 22.92 | No | ns | >0.9999 |
| Combo vs. Combo | 250pg/mL vs. 2500pg/mL  | 28.83 | No | ns | >0.9999 |
| Combo vs. Combo | 250pg/mL vs. 5000pg/mL  | 36    | No | ns | >0.9999 |
| Combo vs. Combo | 500pg/mL vs. 1000pg/mL  | 21.25 | No | ns | >0.9999 |
| Combo vs. Combo | 500pg/mL vs. 2500pg/mL  | 27.17 | No | ns | >0.9999 |
| Combo vs. Combo | 500pg/mL vs. 5000pg/mL  | 34.33 | No | ns | >0.9999 |
| Combo vs. Combo | 1000pg/mL vs. 2500pg/mL | 5.917 | No | ns | >0.9999 |
| Combo vs. Combo | 1000pg/mL vs. 5000pg/mL | 13.08 | No | ns | >0.9999 |
| Combo vs. Combo | 2500pg/mL vs. 5000pg/mL | 7.167 | No | ns |         |

Value

A-B

A-C

A-D

A-E

A-F

A-G

A-H

A-I

A-J

A-K

A-L

A-M

A-N

A-O

A-P

A-Q

A-R

A-S

A-T

A-U

A-V

A-W

A-X

A-Y

A-Z

A-AA

A-AB

A-AC

A-AD

B-C

B-D

B-E

B-F

B-G

B-H

B-I

B-J

B-K

B-L

B-M

B-N

B-O

B-P

B-Q

B-R

B-S

B-T  
B-U  
B-V  
B-W  
B-X  
B-Y  
B-Z  
B-AA  
B-AB  
B-AC  
B-AD  
C-D  
C-E  
C-F  
C-G  
C-H  
C-I  
C-J  
C-K  
C-L  
C-M  
C-N  
C-O  
C-P  
C-Q  
C-R  
C-S  
C-T  
C-U  
C-V  
C-W  
C-X  
C-Y  
C-Z  
C-AA  
C-AB  
C-AC  
C-AD  
D-E  
D-F  
D-G  
D-H  
D-I  
D-J  
D-K  
D-L  
D-M

D-N  
D-O  
D-P  
D-Q  
D-R  
D-S  
D-T  
D-U

D-V  
D-W  
D-X  
D-Y  
D-Z  
D-AA  
D-AB  
D-AC  
D-AD

E-F  
E-G  
E-H  
E-I  
E-J  
E-K  
E-L  
E-M  
E-N  
E-O  
E-P  
E-Q  
E-R  
E-S  
E-T  
E-U

E-V  
E-W  
E-X  
E-Y  
E-Z  
E-AA  
E-AB  
E-AC  
E-AD

F-G  
F-H  
F-I  
F-J  
F-K

F-L

F-M

F-N

F-O

F-P

F-Q

F-R

F-S

F-T

F-U

F-V

F-W

F-X

F-Y

F-Z

F-AA

F-AB

F-AC

F-AD

G-H

G-I

G-J

G-K

G-L

G-M

G-N

G-O

G-P

G-Q

G-R

G-S

G-T

G-U

G-V

G-W

G-X

G-Y

G-Z

G-AA

G-AB

G-AC

G-AD

H-I

H-J

H-K

H-L

H-M

H-N  
H-O  
H-P  
H-Q  
H-R  
H-S  
H-T  
H-U

H-V  
H-W  
H-X  
H-Y  
H-Z  
H-AA  
H-AB  
H-AC  
H-AD

I-J  
I-K  
I-L  
I-M  
I-N  
I-O  
I-P  
I-Q  
I-R  
I-S  
I-T  
I-U

I-V  
I-W  
I-X  
I-Y  
I-Z  
I-AA  
I-AB  
I-AC  
I-AD

J-K  
J-L  
J-M  
J-N  
J-O  
J-P  
J-Q  
J-R  
J-S

J-T

J-U

J-V

J-W

J-X

J-Y

J-Z

J-AA

J-AB

J-AC

J-AD

K-L

K-M

K-N

K-O

K-P

K-Q

K-R

K-S

K-T

K-U

K-V

K-W

K-X

K-Y

K-Z

K-AA

K-AB

K-AC

K-AD

L-M

L-N

L-O

L-P

L-Q

L-R

L-S

L-T

L-U

L-V

L-W

L-X

L-Y

L-Z

L-AA

L-AB

L-AC

L-AD  
M-N  
M-O  
M-P  
M-Q  
M-R  
M-S  
M-T  
M-U  
M-V  
M-W  
M-X  
M-Y  
M-Z  
M-AA  
M-AB  
M-AC  
M-AD  
N-O  
N-P  
N-Q  
N-R  
N-S  
N-T  
N-U  
N-V  
N-W  
N-X  
N-Y  
N-Z  
N-AA  
N-AB  
N-AC  
N-AD  
O-P  
O-Q  
O-R  
O-S  
O-T  
O-U  
O-V  
O-W  
O-X  
O-Y  
O-Z  
O-AA  
O-AB

O-AC  
O-AD  
P-Q  
P-R  
P-S  
P-T  
P-U  
P-V  
P-W  
P-X  
P-Y  
P-Z  
P-AA  
P-AB  
P-AC  
P-AD  
Q-R  
Q-S  
Q-T  
Q-U  
Q-V  
Q-W  
Q-X  
Q-Y  
Q-Z  
Q-AA  
Q-AB  
Q-AC  
Q-AD  
R-S  
R-T  
R-U  
R-V  
R-W  
R-X  
R-Y  
R-Z  
R-AA  
R-AB  
R-AC  
R-AD  
S-T  
S-U  
S-V  
S-W  
S-X  
S-Y

S-Z  
S-AA  
S-AB  
S-AC  
S-AD  
T-U  
T-V  
T-W  
T-X  
T-Y  
T-Z  
T-AA  
T-AB  
T-AC  
T-AD  
U-V  
U-W  
U-X  
U-Y  
U-Z  
U-AA  
U-AB  
U-AC  
U-AD  
V-W  
V-X  
V-Y  
V-Z  
V-AA  
V-AB  
V-AC  
V-AD  
W-X  
W-Y  
W-Z  
W-AA  
W-AB  
W-AC  
W-AD  
X-Y  
X-Z  
X-AA  
X-AB  
X-AC  
X-AD  
Y-Z  
Y-AA

Y-AB  
Y-AC  
Y-AD  
Z-AA  
Z-AB  
Z-AC  
Z-AD  
AA-AB  
AA-AC  
AA-AD  
AB-AC  
AB-AD

| Treatment          | Holm-Šidák's multiple comparisons | Mean Diff. | Below threshold | Summary |
|--------------------|-----------------------------------|------------|-----------------|---------|
| Media vs. FCCP     | Media vs. 5 $\mu$ M FCCP          | 193.3      | Yes             | ****    |
| Media vs. TNFa     | Media vs. 250 pg/mL               | -32.29     | No              | ns      |
| Media vs. TNFa     | Media vs. 500 pg/mL               | -41.08     | Yes             | **      |
| Media vs. TNFa     | Media vs. 750 pg/mL               | -16.04     | No              | ns      |
| Media vs. TNFa     | Media vs. 1000 pg/mL              | -9.316     | No              | ns      |
| Media vs. Butyrate | Media vs. 500 $\mu$ M             | 46.02      | Yes             | **      |
| Media vs. Butyrate | Media vs. 1000 $\mu$ M            | 21.26      | No              | ns      |
| Media vs. Butyrate | Media vs. 2500 $\mu$ M            | -12.4      | No              | ns      |
| Media vs. Butyrate | Media vs. 5000 $\mu$ M            | -12.96     | No              | ns      |
| Media vs. Combo    | Media vs. 250 pg/mL               | -10.9      | No              | ns      |
| Media vs. Combo    | Media vs. 500 pg/mL               | -25.49     | No              | ns      |
| Media vs. Combo    | Media vs. 750 pg/mL               | 11.89      | No              | ns      |
| Media vs. Combo    | Media vs. 1000 pg/mL              | 19.27      | No              | ns      |
| FCCP vs. TNFa      | 5 $\mu$ M FCCP vs. 250 pg/mL      | -225.6     | Yes             | ****    |
| FCCP vs. TNFa      | 5 $\mu$ M FCCP vs. 500 pg/mL      | -234.4     | Yes             | ****    |
| FCCP vs. TNFa      | 5 $\mu$ M FCCP vs. 750 pg/mL      | -209.3     | Yes             | ****    |
| FCCP vs. TNFa      | 5 $\mu$ M FCCP vs. 1000 pg/mL     | -202.6     | Yes             | ****    |
| FCCP vs. Butyrate  | 5 $\mu$ M FCCP vs. 500 $\mu$ M    | -147.3     | Yes             | ****    |
| FCCP vs. Butyrate  | 5 $\mu$ M FCCP vs. 1000 $\mu$ M   | -172       | Yes             | ****    |
| FCCP vs. Butyrate  | 5 $\mu$ M FCCP vs. 2500 $\mu$ M   | -205.7     | Yes             | ****    |
| FCCP vs. Butyrate  | 5 $\mu$ M FCCP vs. 5000 $\mu$ M   | -206.2     | Yes             | ****    |
| FCCP vs. Combo     | 5 $\mu$ M FCCP vs. 250 pg/mL      | -204.2     | Yes             | ****    |
| FCCP vs. Combo     | 5 $\mu$ M FCCP vs. 500 pg/mL      | -218.8     | Yes             | ****    |
| FCCP vs. Combo     | 5 $\mu$ M FCCP vs. 750 pg/mL      | -181.4     | Yes             | ****    |
| FCCP vs. Combo     | 5 $\mu$ M FCCP vs. 1000 pg/mL     | -174       | Yes             | ****    |
| TNFa vs. TNFa      | 250 pg/mL vs. 500 pg/mL           | -8.793     | No              | ns      |
| TNFa vs. TNFa      | 250 pg/mL vs. 750 pg/mL           | 16.25      | No              | ns      |
| TNFa vs. TNFa      | 250 pg/mL vs. 1000 pg/mL          | 22.97      | No              | ns      |
| TNFa vs. butyrate  | 250 pg/mL vs. 500 $\mu$ M         | 78.31      | Yes             | ****    |
| TNFa vs. butyrate  | 250 pg/mL vs. 1000 $\mu$ M        | 53.55      | Yes             | ***     |
| TNFa vs. butyrate  | 250 pg/mL vs. 2500 $\mu$ M        | 19.89      | No              | ns      |
| TNFa vs. butyrate  | 250 pg/mL vs. 5000 $\mu$ M        | 19.33      | No              | ns      |
| TNFa vs. Combo     | 250 pg/mL vs. 250 pg/mL           | 21.39      | No              | ns      |
| TNFa vs. Combo     | 250 pg/mL vs. 500 pg/mL           | 6.804      | No              | ns      |
| TNFa vs. Combo     | 250 pg/mL vs. 750 pg/mL           | 44.18      | Yes             | **      |
| TNFa vs. Combo     | 250 pg/mL vs. 1000 pg/mL          | 51.56      | Yes             | ***     |
| TNFa vs. TNFa      | 500 pg/mL vs. 750 pg/mL           | 25.04      | No              | ns      |
| TNFa vs. TNFa      | 500 pg/mL vs. 1000 pg/mL          | 31.77      | No              | ns      |
| TNFa vs. butyrate  | 500 pg/mL vs. 500 $\mu$ M         | 87.1       | Yes             | ****    |
| TNFa vs. butyrate  | 500 pg/mL vs. 1000 $\mu$ M        | 62.34      | Yes             | ****    |
| TNFa vs. butyrate  | 500 pg/mL vs. 2500 $\mu$ M        | 28.69      | No              | ns      |
| TNFa vs. butyrate  | 500 pg/mL vs. 5000 $\mu$ M        | 28.12      | No              | ns      |
| TNFa vs. Combo     | 500 pg/mL vs. 250 pg/mL           | 30.18      | No              | ns      |
| TNFa vs. Combo     | 500 pg/mL vs. 500 pg/mL           | 15.6       | No              | ns      |
| TNFa vs. Combo     | 500 pg/mL vs. 750 pg/mL           | 52.97      | Yes             | ***     |
| TNFa vs. Combo     | 500 pg/mL vs. 1000 pg/mL          | 60.36      | Yes             | ****    |

|                       |                           |            |      |
|-----------------------|---------------------------|------------|------|
| TNFa vs. TNFa         | 750 pg/mL vs. 1000 pg/mL  | 6.723 No   | ns   |
| TNFa vs. butyrate     | 750 pg/mL vs. 500 µM      | 62.06 Yes  | **** |
| TNFa vs. butyrate     | 750 pg/mL vs. 1000 µM     | 37.3 No    | ns   |
| TNFa vs. butyrate     | 750 pg/mL vs. 2500 µM     | 3.644 No   | ns   |
| TNFa vs. butyrate     | 750 pg/mL vs. 5000 µM     | 3.079 No   | ns   |
| TNFa vs. Combo        | 750 pg/mL vs. 250 pg/mL   | 5.139 No   | ns   |
| TNFa vs. Combo        | 750 pg/mL vs. 500 pg/mL   | -9.446 No  | ns   |
| TNFa vs. Combo        | 750 pg/mL vs. 750 pg/mL   | 27.93 No   | ns   |
| TNFa vs. Combo        | 750 pg/mL vs. 1000 pg/mL  | 35.31 No   | ns   |
| TNFa vs. butyrate     | 1000 pg/mL vs. 500 µM     | 55.33 Yes  | ***  |
| TNFa vs. butyrate     | 1000 pg/mL vs. 1000 µM    | 30.58 No   | ns   |
| TNFa vs. butyrate     | 1000 pg/mL vs. 2500 µM    | -3.079 No  | ns   |
| TNFa vs. butyrate     | 1000 pg/mL vs. 5000 µM    | -3.644 No  | ns   |
| TNFa vs. Combo        | 1000 pg/mL vs. 250 pg/mL  | -1.585 No  | ns   |
| TNFa vs. Combo        | 1000 pg/mL vs. 500 pg/mL  | -16.17 No  | ns   |
| TNFa vs. Combo        | 1000 pg/mL vs. 750 pg/mL  | 21.2 No    | ns   |
| TNFa vs. Combo        | 1000 pg/mL vs. 1000 pg/mL | 28.59 No   | ns   |
| Butyrate vs. Butyrate | 500 µM vs. 1000 µM        | -24.76 No  | ns   |
| Butyrate vs. Butyrate | 500 µM vs. 2500 µM        | -58.41 Yes | **** |
| Butyrate vs. Butyrate | 500 µM vs. 5000 µM        | -58.98 Yes | **** |
| Butyrate vs. Combo    | 500 µM vs. 250 pg/mL      | -56.92 Yes | ***  |
| Butyrate vs. Combo    | 500 µM vs. 500 pg/mL      | -71.5 Yes  | **** |
| Butyrate vs. Combo    | 500 µM vs. 750 pg/mL      | -34.13 No  | ns   |
| Butyrate vs. Combo    | 500 µM vs. 1000 pg/mL     | -26.74 No  | ns   |
| Butyrate vs. Butyrate | 1000 µM vs. 2500 µM       | -33.66 No  | ns   |
| Butyrate vs. Butyrate | 1000 µM vs. 5000 µM       | -34.22 No  | ns   |
| Butyrate vs. Combo    | 1000 µM vs. 250 pg/mL     | -32.16 No  | ns   |
| Butyrate vs. Combo    | 1000 µM vs. 500 pg/mL     | -46.75 Yes | **   |
| Butyrate vs. Combo    | 1000 µM vs. 750 pg/mL     | -9.375 No  | ns   |
| Butyrate vs. Combo    | 1000 µM vs. 1000 pg/mL    | -1.987 No  | ns   |
| Butyrate vs. Butyrate | 2500 µM vs. 5000 µM       | -0.5652 No | ns   |
| Butyrate vs. Combo    | 2500 µM vs. 250 pg/mL     | 1.495 No   | ns   |
| Butyrate vs. Combo    | 2500 µM vs. 500 pg/mL     | -13.09 No  | ns   |
| Butyrate vs. Combo    | 2500 µM vs. 750 pg/mL     | 24.28 No   | ns   |
| Butyrate vs. Combo    | 2500 µM vs. 1000 pg/mL    | 31.67 No   | ns   |
| Butyrate vs. Combo    | 5000 µM vs. 250 pg/mL     | 2.06 No    | ns   |
| Butyrate vs. Combo    | 5000 µM vs. 500 pg/mL     | -12.53 No  | ns   |
| Butyrate vs. Combo    | 5000 µM vs. 750 pg/mL     | 24.85 No   | ns   |
| Butyrate vs. Combo    | 5000 µM vs. 1000 pg/mL    | 32.24 No   | ns   |
| Combo vs. Combo       | 250 pg/mL vs. 500 pg/mL   | -14.59 No  | ns   |
| Combo vs. Combo       | 250 pg/mL vs. 750 pg/mL   | 22.79 No   | ns   |
| Combo vs. Combo       | 250 pg/mL vs. 1000 pg/mL  | 30.18 No   | ns   |
| Combo vs. Combo       | 500 pg/mL vs. 750 pg/mL   | 37.37 No   | ns   |
| Combo vs. Combo       | 500 pg/mL vs. 1000 pg/mL  | 44.76 Yes  | **   |
| Combo vs. Combo       | 750 pg/mL vs. 1000 pg/mL  | 7.388 No   | ns   |

A-B

A-C

A-D

A-E

A-F

A-G

A-H

A-I

A-J

A-K

A-L

A-M

A-N

B-C

B-D

B-E

B-F

B-G

B-H

B-I

B-J

B-K

B-L

B-M

B-N

C-D

C-E

C-F

C-G

C-H

C-I

C-J

C-K

C-L

C-M

C-N

D-E

D-F

D-G

D-H

D-I

D-J

D-K

D-L

D-M

D-N

E-F  
E-G  
E-H  
E-I  
E-J  
E-K  
E-L  
E-M  
E-N  
F-G  
F-H  
F-I  
F-J  
F-K  
F-L  
F-M  
F-N  
G-H  
G-I  
G-J  
G-K  
G-L  
G-M  
G-N  
H-I  
H-J  
H-K  
H-L  
H-M  
H-N  
I-J  
I-K  
I-L  
I-M  
I-N  
J-K  
J-L  
J-M  
J-N  
K-L  
K-M  
K-N  
L-M  
L-N

|                    | Holm-Šidák's multiple comparisons test | Mean Diff. | Below threshold | Summary |
|--------------------|----------------------------------------|------------|-----------------|---------|
| Media vs. FCCP     | Media vs. 5 µM FCCP                    | 18.54      | Yes             | **      |
| Media vs. TNFa     | Media vs. 250 pg/mL                    | 10.25      | No              | ns      |
| Media vs. TNFa     | Media vs. 500 pg/mL                    | 14.34      | No              | ns      |
| Media vs. TNFa     | Media vs. 750 pg/mL                    | 18.79      | Yes             | **      |
| Media vs. TNFa     | Media vs. 1000 pg/mL                   | 19.35      | Yes             | **      |
| Media vs. Butyrate | Media vs. 500 µM                       | -3.184     | No              | ns      |
| Media vs. Butyrate | Media vs. 1000 µM                      | -9.599     | No              | ns      |
| Media vs. Butyrate | Media vs. 2500 µM                      | -9.378     | No              | ns      |
| Media vs. Butyrate | Media vs. 5000 µM                      | -8         | No              | ns      |
| Media vs. Combo    | Media vs. 250 pg/mL                    | -2.184     | No              | ns      |
| Media vs. Combo    | Media vs. 500 pg/mL                    | -4.317     | No              | ns      |
| Media vs. Combo    | Media vs. 750 pg/mL                    | 15.55      | Yes             | *       |
| Media vs. Combo    | Media vs. 1000 pg/mL                   | 11.59      | No              | ns      |
| FCCP vs. TNFa      | 5 µM FCCP vs. 250 pg/mL                | -8.288     | No              | ns      |
| FCCP vs. TNFa      | 5 µM FCCP vs. 500 pg/mL                | -4.194     | No              | ns      |
| FCCP vs. TNFa      | 5 µM FCCP vs. 750 pg/mL                | 0.2541     | No              | ns      |
| FCCP vs. TNFa      | 5 µM FCCP vs. 1000 pg/mL               | 0.8151     | No              | ns      |
| FCCP vs. Butyrate  | 5 µM FCCP vs. 500 µM                   | -21.72     | Yes             | **      |
| FCCP vs. Butyrate  | 5 µM FCCP vs. 1000 µM                  | -28.14     | Yes             | ****    |
| FCCP vs. Butyrate  | 5 µM FCCP vs. 2500 µM                  | -27.92     | Yes             | ****    |
| FCCP vs. Butyrate  | 5 µM FCCP vs. 5000 µM                  | -26.54     | Yes             | ****    |
| FCCP vs. Combo     | 5 µM FCCP vs. 250 pg/mL                | -20.72     | Yes             | **      |
| FCCP vs. Combo     | 5 µM FCCP vs. 500 pg/mL                | -22.85     | Yes             | **      |
| FCCP vs. Combo     | 5 µM FCCP vs. 750 pg/mL                | -2.99      | No              | ns      |
| FCCP vs. Combo     | 5 µM FCCP vs. 1000 pg/mL               | -6.949     | No              | ns      |
| TNFa vs. TNFa      | 250 pg/mL vs. 500 pg/mL                | 4.095      | No              | ns      |
| TNFa vs. TNFa      | 250 pg/mL vs. 750 pg/mL                | 8.542      | No              | ns      |
| TNFa vs. TNFa      | 250 pg/mL vs. 1000 pg/mL               | 9.103      | No              | ns      |
| TNFa vs. butyrate  | 250 pg/mL vs. 500 µM                   | -13.43     | No              | ns      |
| TNFa vs. butyrate  | 250 pg/mL vs. 1000 µM                  | -19.85     | Yes             | **      |
| TNFa vs. butyrate  | 250 pg/mL vs. 2500 µM                  | -19.63     | Yes             | **      |
| TNFa vs. butyrate  | 250 pg/mL vs. 5000 µM                  | -18.25     | Yes             | *       |
| TNFa vs. Combo     | 250 pg/mL vs. 250 pg/mL                | -12.43     | No              | ns      |
| TNFa vs. Combo     | 250 pg/mL vs. 500 pg/mL                | -14.57     | No              | ns      |
| TNFa vs. Combo     | 250 pg/mL vs. 750 pg/mL                | 5.299      | No              | ns      |
| TNFa vs. Combo     | 250 pg/mL vs. 1000 pg/mL               | 1.34       | No              | ns      |
| TNFa vs. TNFa      | 500 pg/mL vs. 750 pg/mL                | 4.448      | No              | ns      |
| TNFa vs. TNFa      | 500 pg/mL vs. 1000 pg/mL               | 5.009      | No              | ns      |
| TNFa vs. butyrate  | 500 pg/mL vs. 500 µM                   | -17.53     | Yes             | *       |
| TNFa vs. butyrate  | 500 pg/mL vs. 1000 µM                  | -23.94     | Yes             | ***     |
| TNFa vs. butyrate  | 500 pg/mL vs. 2500 µM                  | -23.72     | Yes             | ***     |
| TNFa vs. butyrate  | 500 pg/mL vs. 5000 µM                  | -22.34     | Yes             | **      |
| TNFa vs. Combo     | 500 pg/mL vs. 250 pg/mL                | -16.53     | No              | ns      |
| TNFa vs. Combo     | 500 pg/mL vs. 500 pg/mL                | -18.66     | Yes             | *       |
| TNFa vs. Combo     | 500 pg/mL vs. 750 pg/mL                | 1.204      | No              | ns      |
| TNFa vs. Combo     | 500 pg/mL vs. 1000 pg/mL               | -2.755     | No              | ns      |

|                       |                           |            |      |
|-----------------------|---------------------------|------------|------|
| TNFa vs. TNFa         | 750 pg/mL vs. 1000 pg/mL  | 0.561 No   | ns   |
| TNFa vs. butyrate     | 750 pg/mL vs. 500 µM      | -21.98 Yes | **   |
| TNFa vs. butyrate     | 750 pg/mL vs. 1000 µM     | -28.39 Yes | **** |
| TNFa vs. butyrate     | 750 pg/mL vs. 2500 µM     | -28.17 Yes | **** |
| TNFa vs. butyrate     | 750 pg/mL vs. 5000 µM     | -26.79 Yes | **** |
| TNFa vs. Combo        | 750 pg/mL vs. 250 pg/mL   | -20.98 Yes | **   |
| TNFa vs. Combo        | 750 pg/mL vs. 500 pg/mL   | -23.11 Yes | ***  |
| TNFa vs. Combo        | 750 pg/mL vs. 750 pg/mL   | -3.244 No  | ns   |
| TNFa vs. Combo        | 750 pg/mL vs. 1000 pg/mL  | -7.203 No  | ns   |
| TNFa vs. butyrate     | 1000 pg/mL vs. 500 µM     | -22.54 Yes | **   |
| TNFa vs. butyrate     | 1000 pg/mL vs. 1000 µM    | -28.95 Yes | **** |
| TNFa vs. butyrate     | 1000 pg/mL vs. 2500 µM    | -28.73 Yes | **** |
| TNFa vs. butyrate     | 1000 pg/mL vs. 5000 µM    | -27.35 Yes | **** |
| TNFa vs. Combo        | 1000 pg/mL vs. 250 pg/mL  | -21.54 Yes | **   |
| TNFa vs. Combo        | 1000 pg/mL vs. 500 pg/mL  | -23.67 Yes | ***  |
| TNFa vs. Combo        | 1000 pg/mL vs. 750 pg/mL  | -3.805 No  | ns   |
| TNFa vs. Combo        | 1000 pg/mL vs. 1000 pg/mL | -7.764 No  | ns   |
| Butyrate vs. Butyrate | 500 µM vs. 1000 µM        | -6.415 No  | ns   |
| Butyrate vs. Butyrate | 500 µM vs. 2500 µM        | -6.194 No  | ns   |
| Butyrate vs. Butyrate | 500 µM vs. 5000 µM        | -4.816 No  | ns   |
| Butyrate vs. Combo    | 500 µM vs. 250 pg/mL      | 0.9997 No  | ns   |
| Butyrate vs. Combo    | 500 µM vs. 500 pg/mL      | -1.133 No  | ns   |
| Butyrate vs. Combo    | 500 µM vs. 750 pg/mL      | 18.73 Yes  | *    |
| Butyrate vs. Combo    | 500 µM vs. 1000 pg/mL     | 14.77 No   | ns   |
| Butyrate vs. Butyrate | 1000 µM vs. 2500 µM       | 0.2209 No  | ns   |
| Butyrate vs. Butyrate | 1000 µM vs. 5000 µM       | 1.599 No   | ns   |
| Butyrate vs. Combo    | 1000 µM vs. 250 pg/mL     | 7.415 No   | ns   |
| Butyrate vs. Combo    | 1000 µM vs. 500 pg/mL     | 5.282 No   | ns   |
| Butyrate vs. Combo    | 1000 µM vs. 750 pg/mL     | 25.15 Yes  | ***  |
| Butyrate vs. Combo    | 1000 µM vs. 1000 pg/mL    | 21.19 Yes  | **   |
| Butyrate vs. Butyrate | 2500 µM vs. 5000 µM       | 1.378 No   | ns   |
| Butyrate vs. Combo    | 2500 µM vs. 250 pg/mL     | 7.194 No   | ns   |
| Butyrate vs. Combo    | 2500 µM vs. 500 pg/mL     | 5.061 No   | ns   |
| Butyrate vs. Combo    | 2500 µM vs. 750 pg/mL     | 24.93 Yes  | ***  |
| Butyrate vs. Combo    | 2500 µM vs. 1000 pg/mL    | 20.97 Yes  | **   |
| Butyrate vs. Combo    | 5000 µM vs. 250 pg/mL     | 5.816 No   | ns   |
| Butyrate vs. Combo    | 5000 µM vs. 500 pg/mL     | 3.683 No   | ns   |
| Butyrate vs. Combo    | 5000 µM vs. 750 pg/mL     | 23.55 Yes  | ***  |
| Butyrate vs. Combo    | 5000 µM vs. 1000 pg/mL    | 19.59 Yes  | **   |
| Combo vs. Combo       | 250 pg/mL vs. 500 pg/mL   | -2.132 No  | ns   |
| Combo vs. Combo       | 250 pg/mL vs. 750 pg/mL   | 17.73 Yes  | *    |
| Combo vs. Combo       | 250 pg/mL vs. 1000 pg/mL  | 13.77 No   | ns   |
| Combo vs. Combo       | 500 pg/mL vs. 750 pg/mL   | 19.86 Yes  | **   |
| Combo vs. Combo       | 500 pg/mL vs. 1000 pg/mL  | 15.91 No   | ns   |
| Combo vs. Combo       | 750 pg/mL vs. 1000 pg/mL  | -3.959 No  | ns   |

A-B

A-C

A-D

A-E

A-F

A-G

A-H

A-I

A-J

A-K

A-L

A-M

A-N

B-C

B-D

B-E

B-F

B-G

B-H

B-I

B-J

B-K

B-L

B-M

B-N

C-D

C-E

C-F

C-G

C-H

C-I

C-J

C-K

C-L

C-M

C-N

D-E

D-F

D-G

D-H

D-I

D-J

D-K

D-L

D-M

D-N

E-F  
E-G  
E-H  
E-I  
E-J  
E-K  
E-L  
E-M  
E-N  
F-G  
F-H  
F-I  
F-J  
F-K  
F-L  
F-M  
F-N  
G-H  
G-I  
G-J  
G-K  
G-L  
G-M  
G-N  
H-I  
H-J  
H-K  
H-L  
H-M  
H-N  
I-J  
I-K  
I-L  
I-M  
I-N  
J-K  
J-L  
J-M  
J-N  
K-L  
K-M  
K-N  
L-M  
L-N

| Treatment          | Dunn's multiple comparisons test | Mean rank | Significant' | Summary |
|--------------------|----------------------------------|-----------|--------------|---------|
| Media vs. MEN      | Media vs. 50µM MEN               | -21.83    | No           | ns      |
| Media vs. TNFa     | Media vs. 50pg/mL                | -10.13    | No           | ns      |
| Media vs. TNFa     | Media vs. 100pg/mL               | 2.267     | No           | ns      |
| Media vs. TNFa     | Media vs. 150pg/mL               | 32.58     | No           | ns      |
| Media vs. TNFa     | Media vs. 200pg/mL               | 30.67     | No           | ns      |
| Media vs. TNFa     | Media vs. 250pg/mL               | 55.25     | No           | ns      |
| Media vs. TNFa     | Media vs. 500pg/mL               | 62.83     | No           | ns      |
| Media vs. TNFa     | Media vs. 1000pg/mL              | 58.67     | No           | ns      |
| Media vs. TNFa     | Media vs. 2500pg/mL              | 111.5     | No           | ns      |
| Media vs. TNFa     | Media vs. 5000pg/mL              | 138       | Yes          | **      |
| Media vs. Butyrate | Media vs. 50µM                   | -2        | No           | ns      |
| Media vs. Butyrate | Media vs. 75µM                   | 30.58     | No           | ns      |
| Media vs. Butyrate | Media vs. 100µM                  | 20.17     | No           | ns      |
| Media vs. Butyrate | Media vs. 250µM                  | 38.17     | No           | ns      |
| Media vs. Butyrate | Media vs. 500µM                  | 51.67     | No           | ns      |
| Media vs. Butyrate | Media vs. 750µM                  | 38.17     | No           | ns      |
| Media vs. Butyrate | Media vs. 1000µM                 | 48.5      | No           | ns      |
| Media vs. Butyrate | Media vs. 2500µM                 | 75.67     | No           | ns      |
| Media vs. Butyrate | Media vs. 5000µM                 | 84.17     | No           | ns      |
| Media vs. Butyrate | Media vs. 7500µM                 | 92.5      | No           | ns      |
| Media vs. Combo    | Media vs. 50pg/mL                | 61.5      | No           | ns      |
| Media vs. Combo    | Media vs. 100pg/mL               | 55.17     | No           | ns      |
| Media vs. Combo    | Media vs. 150pg/mL               | 88.17     | No           | ns      |
| Media vs. Combo    | Media vs. 200pg/mL               | 110.5     | No           | ns      |
| Media vs. Combo    | Media vs. 250pg/mL               | 99.5      | No           | ns      |
| Media vs. Combo    | Media vs. 500pg/mL               | 124.9     | Yes          | *       |
| Media vs. Combo    | Media vs. 1000pg/mL              | 133.2     | Yes          | **      |
| Media vs. Combo    | Media vs. 2500pg/mL              | 143.3     | Yes          | ***     |
| Media vs. Combo    | Media vs. 5000pg/mL              | 148.7     | Yes          | ***     |
| MEN vs. TNFa       | 50µM MEN vs. 50pg/mL             | 11.7      | No           | ns      |
| MEN vs. TNFa       | 50µM MEN vs. 100pg/mL            | 24.1      | No           | ns      |
| MEN vs. TNFa       | 50µM MEN vs. 150pg/mL            | 54.42     | No           | ns      |
| MEN vs. TNFa       | 50µM MEN vs. 200pg/mL            | 52.5      | No           | ns      |
| MEN vs. TNFa       | 50µM MEN vs. 250pg/mL            | 77.08     | No           | ns      |
| MEN vs. TNFa       | 50µM MEN vs. 500pg/mL            | 84.67     | No           | ns      |
| MEN vs. TNFa       | 50µM MEN vs. 1000pg/mL           | 80.5      | No           | ns      |
| MEN vs. TNFa       | 50µM MEN vs. 2500pg/mL           | 133.3     | Yes          | **      |
| MEN vs. TNFa       | 50µM MEN vs. 5000pg/mL           | 159.8     | Yes          | ****    |
| MEN vs. Butyrate   | 50µM MEN vs. 50µM                | 19.83     | No           | ns      |
| MEN vs. Butyrate   | 50µM MEN vs. 75µM                | 52.42     | No           | ns      |
| MEN vs. Butyrate   | 50µM MEN vs. 100µM               | 42        | No           | ns      |
| MEN vs. Butyrate   | 50µM MEN vs. 250µM               | 60        | No           | ns      |
| MEN vs. Butyrate   | 50µM MEN vs. 500µM               | 73.5      | No           | ns      |
| MEN vs. Butyrate   | 50µM MEN vs. 750µM               | 60        | No           | ns      |
| MEN vs. Butyrate   | 50µM MEN vs. 1000µM              | 70.33     | No           | ns      |
| MEN vs. Butyrate   | 50µM MEN vs. 2500µM              | 97.5      | No           | ns      |

|                   |                        |           |      |
|-------------------|------------------------|-----------|------|
| MEN vs. Butyrate  | 50μM MEN vs. 5000μM    | 106 No    | ns   |
| MEN vs. Butyrate  | 50μM MEN vs. 7500μM    | 114.3 No  | ns   |
| MEN vs. Combo     | 50μM MEN vs. 50pg/mL   | 83.33 No  | ns   |
| MEN vs. Combo     | 50μM MEN vs. 100pg/mL  | 77 No     | ns   |
| MEN vs. Combo     | 50μM MEN vs. 150pg/mL  | 110 No    | ns   |
| MEN vs. Combo     | 50μM MEN vs. 200pg/mL  | 132.3 Yes | **   |
| MEN vs. Combo     | 50μM MEN vs. 250pg/mL  | 121.3 Yes | *    |
| MEN vs. Combo     | 50μM MEN vs. 500pg/mL  | 146.8 Yes | ***  |
| MEN vs. Combo     | 50μM MEN vs. 1000pg/mL | 155 Yes   | **** |
| MEN vs. Combo     | 50μM MEN vs. 2500pg/mL | 165.2 Yes | **** |
| MEN vs. Combo     | 50μM MEN vs. 5000pg/mL | 170.5 Yes | **** |
| TNFa vs. TNFa     | 50pg/mL vs. 100pg/mL   | 12.4 No   | ns   |
| TNFa vs. TNFa     | 50pg/mL vs. 150pg/mL   | 42.72 No  | ns   |
| TNFa vs. TNFa     | 50pg/mL vs. 200pg/mL   | 40.8 No   | ns   |
| TNFa vs. TNFa     | 50pg/mL vs. 250pg/mL   | 65.38 No  | ns   |
| TNFa vs. TNFa     | 50pg/mL vs. 500pg/mL   | 72.97 No  | ns   |
| TNFa vs. TNFa     | 50pg/mL vs. 1000pg/mL  | 68.8 No   | ns   |
| TNFa vs. TNFa     | 50pg/mL vs. 2500pg/mL  | 121.6 Yes | *    |
| TNFa vs. TNFa     | 50pg/mL vs. 5000pg/mL  | 148.1 Yes | ***  |
| TNFa vs. Butyrate | 50pg/mL vs. 50μM       | 8.133 No  | ns   |
| TNFa vs. Butyrate | 50pg/mL vs. 75μM       | 40.72 No  | ns   |
| TNFa vs. Butyrate | 50pg/mL vs. 100μM      | 30.3 No   | ns   |
| TNFa vs. Butyrate | 50pg/mL vs. 250μM      | 48.3 No   | ns   |
| TNFa vs. Butyrate | 50pg/mL vs. 500μM      | 61.8 No   | ns   |
| TNFa vs. Butyrate | 50pg/mL vs. 750μM      | 48.3 No   | ns   |
| TNFa vs. Butyrate | 50pg/mL vs. 1000μM     | 58.63 No  | ns   |
| TNFa vs. Butyrate | 50pg/mL vs. 2500μM     | 85.8 No   | ns   |
| TNFa vs. Butyrate | 50pg/mL vs. 5000μM     | 94.3 No   | ns   |
| TNFa vs. Butyrate | 50pg/mL vs. 7500μM     | 102.6 No  | ns   |
| TNFa vs Combo     | 50pg/mL vs. 50pg/mL    | 71.63 No  | ns   |
| TNFa vs Combo     | 50pg/mL vs. 100pg/mL   | 65.3 No   | ns   |
| TNFa vs Combo     | 50pg/mL vs. 150pg/mL   | 98.3 No   | ns   |
| TNFa vs Combo     | 50pg/mL vs. 200pg/mL   | 120.6 Yes | *    |
| TNFa vs Combo     | 50pg/mL vs. 250pg/mL   | 109.6 No  | ns   |
| TNFa vs Combo     | 50pg/mL vs. 500pg/mL   | 135.1 Yes | **   |
| TNFa vs Combo     | 50pg/mL vs. 1000pg/mL  | 143.3 Yes | **   |
| TNFa vs Combo     | 50pg/mL vs. 2500pg/mL  | 153.5 Yes | ***  |
| TNFa vs Combo     | 50pg/mL vs. 5000pg/mL  | 158.8 Yes | ***  |
| TNFa vs. TNFa     | 100pg/mL vs. 150pg/mL  | 30.32 No  | ns   |
| TNFa vs. TNFa     | 100pg/mL vs. 200pg/mL  | 28.4 No   | ns   |
| TNFa vs. TNFa     | 100pg/mL vs. 250pg/mL  | 52.98 No  | ns   |
| TNFa vs. TNFa     | 100pg/mL vs. 500pg/mL  | 60.57 No  | ns   |
| TNFa vs. TNFa     | 100pg/mL vs. 1000pg/mL | 56.4 No   | ns   |
| TNFa vs. TNFa     | 100pg/mL vs. 2500pg/mL | 109.2 No  | ns   |
| TNFa vs. TNFa     | 100pg/mL vs. 5000pg/mL | 135.7 Yes | **   |
| TNFa vs. Butyrate | 100pg/mL vs. 50μM      | -4.267 No | ns   |
| TNFa vs. Butyrate | 100pg/mL vs. 75μM      | 28.32 No  | ns   |

|                   |                        |           |    |
|-------------------|------------------------|-----------|----|
| TNFa vs. Butyrate | 100pg/mL vs. 100µM     | 17.9 No   | ns |
| TNFa vs. Butyrate | 100pg/mL vs. 250µM     | 35.9 No   | ns |
| TNFa vs. Butyrate | 100pg/mL vs. 500µM     | 49.4 No   | ns |
| TNFa vs. Butyrate | 100pg/mL vs. 750µM     | 35.9 No   | ns |
| TNFa vs. Butyrate | 100pg/mL vs. 1000µM    | 46.23 No  | ns |
| TNFa vs. Butyrate | 100pg/mL vs. 2500µM    | 73.4 No   | ns |
| TNFa vs. Butyrate | 100pg/mL vs. 5000µM    | 81.9 No   | ns |
| TNFa vs. Butyrate | 100pg/mL vs. 7500µM    | 90.23 No  | ns |
| TNFa vs Combo     | 100pg/mL vs. 50pg/mL   | 59.23 No  | ns |
| TNFa vs Combo     | 100pg/mL vs. 100pg/mL  | 52.9 No   | ns |
| TNFa vs Combo     | 100pg/mL vs. 150pg/mL  | 85.9 No   | ns |
| TNFa vs Combo     | 100pg/mL vs. 200pg/mL  | 108.2 No  | ns |
| TNFa vs Combo     | 100pg/mL vs. 250pg/mL  | 97.23 No  | ns |
| TNFa vs Combo     | 100pg/mL vs. 500pg/mL  | 122.7 Yes | *  |
| TNFa vs Combo     | 100pg/mL vs. 1000pg/mL | 130.9 Yes | *  |
| TNFa vs Combo     | 100pg/mL vs. 2500pg/mL | 141.1 Yes | ** |
| TNFa vs Combo     | 100pg/mL vs. 5000pg/mL | 146.4 Yes | ** |
| TNFa vs. TNFa     | 150pg/mL vs. 200pg/mL  | -1.917 No | ns |
| TNFa vs. TNFa     | 150pg/mL vs. 250pg/mL  | 22.67 No  | ns |
| TNFa vs. TNFa     | 150pg/mL vs. 500pg/mL  | 30.25 No  | ns |
| TNFa vs. TNFa     | 150pg/mL vs. 1000pg/mL | 26.08 No  | ns |
| TNFa vs. TNFa     | 150pg/mL vs. 2500pg/mL | 78.92 No  | ns |
| TNFa vs. TNFa     | 150pg/mL vs. 5000pg/mL | 105.4 No  | ns |
| TNFa vs. Butyrate | 150pg/mL vs. 50µM      | -34.58 No | ns |
| TNFa vs. Butyrate | 150pg/mL vs. 75µM      | -2 No     | ns |
| TNFa vs. Butyrate | 150pg/mL vs. 100µM     | -12.42 No | ns |
| TNFa vs. Butyrate | 150pg/mL vs. 250µM     | 5.583 No  | ns |
| TNFa vs. Butyrate | 150pg/mL vs. 500µM     | 19.08 No  | ns |
| TNFa vs. Butyrate | 150pg/mL vs. 750µM     | 5.583 No  | ns |
| TNFa vs. Butyrate | 150pg/mL vs. 1000µM    | 15.92 No  | ns |
| TNFa vs. Butyrate | 150pg/mL vs. 2500µM    | 43.08 No  | ns |
| TNFa vs. Butyrate | 150pg/mL vs. 5000µM    | 51.58 No  | ns |
| TNFa vs. Butyrate | 150pg/mL vs. 7500µM    | 59.92 No  | ns |
| TNFa vs Combo     | 150pg/mL vs. 50pg/mL   | 28.92 No  | ns |
| TNFa vs Combo     | 150pg/mL vs. 100pg/mL  | 22.58 No  | ns |
| TNFa vs Combo     | 150pg/mL vs. 150pg/mL  | 55.58 No  | ns |
| TNFa vs Combo     | 150pg/mL vs. 200pg/mL  | 77.92 No  | ns |
| TNFa vs Combo     | 150pg/mL vs. 250pg/mL  | 66.92 No  | ns |
| TNFa vs Combo     | 150pg/mL vs. 500pg/mL  | 92.33 No  | ns |
| TNFa vs Combo     | 150pg/mL vs. 1000pg/mL | 100.6 No  | ns |
| TNFa vs Combo     | 150pg/mL vs. 2500pg/mL | 110.8 No  | ns |
| TNFa vs Combo     | 150pg/mL vs. 5000pg/mL | 116.1 Yes | *  |
| TNFa vs. TNFa     | 200pg/mL vs. 250pg/mL  | 24.58 No  | ns |
| TNFa vs. TNFa     | 200pg/mL vs. 500pg/mL  | 32.17 No  | ns |
| TNFa vs. TNFa     | 200pg/mL vs. 1000pg/mL | 28 No     | ns |
| TNFa vs. TNFa     | 200pg/mL vs. 2500pg/mL | 80.83 No  | ns |
| TNFa vs. TNFa     | 200pg/mL vs. 5000pg/mL | 107.3 No  | ns |

|                   |                        |          |     |    |
|-------------------|------------------------|----------|-----|----|
| TNFa vs. Butyrate | 200pg/mL vs. 50µM      | -32.67   | No  | ns |
| TNFa vs. Butyrate | 200pg/mL vs. 75µM      | -0.08333 | No  | ns |
| TNFa vs. Butyrate | 200pg/mL vs. 100µM     | -10.5    | No  | ns |
| TNFa vs. Butyrate | 200pg/mL vs. 250µM     | 7.5      | No  | ns |
| TNFa vs. Butyrate | 200pg/mL vs. 500µM     | 21       | No  | ns |
| TNFa vs. Butyrate | 200pg/mL vs. 750µM     | 7.5      | No  | ns |
| TNFa vs. Butyrate | 200pg/mL vs. 1000µM    | 17.83    | No  | ns |
| TNFa vs. Butyrate | 200pg/mL vs. 2500µM    | 45       | No  | ns |
| TNFa vs. Butyrate | 200pg/mL vs. 5000µM    | 53.5     | No  | ns |
| TNFa vs. Butyrate | 200pg/mL vs. 7500µM    | 61.83    | No  | ns |
| TNFa vs Combo     | 200pg/mL vs. 50pg/mL   | 30.83    | No  | ns |
| TNFa vs Combo     | 200pg/mL vs. 100pg/mL  | 24.5     | No  | ns |
| TNFa vs Combo     | 200pg/mL vs. 150pg/mL  | 57.5     | No  | ns |
| TNFa vs Combo     | 200pg/mL vs. 200pg/mL  | 79.83    | No  | ns |
| TNFa vs Combo     | 200pg/mL vs. 250pg/mL  | 68.83    | No  | ns |
| TNFa vs Combo     | 200pg/mL vs. 500pg/mL  | 94.25    | No  | ns |
| TNFa vs Combo     | 200pg/mL vs. 1000pg/mL | 102.5    | No  | ns |
| TNFa vs Combo     | 200pg/mL vs. 2500pg/mL | 112.7    | No  | ns |
| TNFa vs Combo     | 200pg/mL vs. 5000pg/mL | 118      | Yes | *  |
| TNFa vs. TNFa     | 250pg/mL vs. 500pg/mL  | 7.583    | No  | ns |
| TNFa vs. TNFa     | 250pg/mL vs. 1000pg/mL | 3.417    | No  | ns |
| TNFa vs. TNFa     | 250pg/mL vs. 2500pg/mL | 56.25    | No  | ns |
| TNFa vs. TNFa     | 250pg/mL vs. 5000pg/mL | 82.75    | No  | ns |
| TNFa vs. Butyrate | 250pg/mL vs. 50µM      | -57.25   | No  | ns |
| TNFa vs. Butyrate | 250pg/mL vs. 75µM      | -24.67   | No  | ns |
| TNFa vs. Butyrate | 250pg/mL vs. 100µM     | -35.08   | No  | ns |
| TNFa vs. Butyrate | 250pg/mL vs. 250µM     | -17.08   | No  | ns |
| TNFa vs. Butyrate | 250pg/mL vs. 500µM     | -3.583   | No  | ns |
| TNFa vs. Butyrate | 250pg/mL vs. 750µM     | -17.08   | No  | ns |
| TNFa vs. Butyrate | 250pg/mL vs. 1000µM    | -6.75    | No  | ns |
| TNFa vs. Butyrate | 250pg/mL vs. 2500µM    | 20.42    | No  | ns |
| TNFa vs. Butyrate | 250pg/mL vs. 5000µM    | 28.92    | No  | ns |
| TNFa vs. Butyrate | 250pg/mL vs. 7500µM    | 37.25    | No  | ns |
| TNFa vs Combo     | 250pg/mL vs. 50pg/mL   | 6.25     | No  | ns |
| TNFa vs Combo     | 250pg/mL vs. 100pg/mL  | -0.08333 | No  | ns |
| TNFa vs Combo     | 250pg/mL vs. 150pg/mL  | 32.92    | No  | ns |
| TNFa vs Combo     | 250pg/mL vs. 200pg/mL  | 55.25    | No  | ns |
| TNFa vs Combo     | 250pg/mL vs. 250pg/mL  | 44.25    | No  | ns |
| TNFa vs Combo     | 250pg/mL vs. 500pg/mL  | 69.67    | No  | ns |
| TNFa vs Combo     | 250pg/mL vs. 1000pg/mL | 77.92    | No  | ns |
| TNFa vs Combo     | 250pg/mL vs. 2500pg/mL | 88.08    | No  | ns |
| TNFa vs Combo     | 250pg/mL vs. 5000pg/mL | 93.42    | No  | ns |
| TNFa vs. TNFa     | 500pg/mL vs. 1000pg/mL | -4.167   | No  | ns |
| TNFa vs. TNFa     | 500pg/mL vs. 2500pg/mL | 48.67    | No  | ns |
| TNFa vs. TNFa     | 500pg/mL vs. 5000pg/mL | 75.17    | No  | ns |
| TNFa vs. Butyrate | 500pg/mL vs. 50µM      | -64.83   | No  | ns |
| TNFa vs. Butyrate | 500pg/mL vs. 75µM      | -32.25   | No  | ns |

|                   |                         |        |    |    |
|-------------------|-------------------------|--------|----|----|
| TNFa vs. Butyrate | 500pg/mL vs. 100µM      | -42.67 | No | ns |
| TNFa vs. Butyrate | 500pg/mL vs. 250µM      | -24.67 | No | ns |
| TNFa vs. Butyrate | 500pg/mL vs. 500µM      | -11.17 | No | ns |
| TNFa vs. Butyrate | 500pg/mL vs. 750µM      | -24.67 | No | ns |
| TNFa vs. Butyrate | 500pg/mL vs. 1000µM     | -14.33 | No | ns |
| TNFa vs. Butyrate | 500pg/mL vs. 2500µM     | 12.83  | No | ns |
| TNFa vs. Butyrate | 500pg/mL vs. 5000µM     | 21.33  | No | ns |
| TNFa vs. Butyrate | 500pg/mL vs. 7500µM     | 29.67  | No | ns |
| TNFa vs Combo     | 500pg/mL vs. 50pg/mL    | -1.333 | No | ns |
| TNFa vs Combo     | 500pg/mL vs. 100pg/mL   | -7.667 | No | ns |
| TNFa vs Combo     | 500pg/mL vs. 150pg/mL   | 25.33  | No | ns |
| TNFa vs Combo     | 500pg/mL vs. 200pg/mL   | 47.67  | No | ns |
| TNFa vs Combo     | 500pg/mL vs. 250pg/mL   | 36.67  | No | ns |
| TNFa vs Combo     | 500pg/mL vs. 500pg/mL   | 62.08  | No | ns |
| TNFa vs Combo     | 500pg/mL vs. 1000pg/mL  | 70.33  | No | ns |
| TNFa vs Combo     | 500pg/mL vs. 2500pg/mL  | 80.5   | No | ns |
| TNFa vs Combo     | 500pg/mL vs. 5000pg/mL  | 85.83  | No | ns |
| TNFa vs. TNFa     | 1000pg/mL vs. 2500pg/mL | 52.83  | No | ns |
| TNFa vs. TNFa     | 1000pg/mL vs. 5000pg/mL | 79.33  | No | ns |
| TNFa vs. Butyrate | 1000pg/mL vs. 50µM      | -60.67 | No | ns |
| TNFa vs. Butyrate | 1000pg/mL vs. 75µM      | -28.08 | No | ns |
| TNFa vs. Butyrate | 1000pg/mL vs. 100µM     | -38.5  | No | ns |
| TNFa vs. Butyrate | 1000pg/mL vs. 250µM     | -20.5  | No | ns |
| TNFa vs. Butyrate | 1000pg/mL vs. 500µM     | -7     | No | ns |
| TNFa vs. Butyrate | 1000pg/mL vs. 750µM     | -20.5  | No | ns |
| TNFa vs. Butyrate | 1000pg/mL vs. 1000µM    | -10.17 | No | ns |
| TNFa vs. Butyrate | 1000pg/mL vs. 2500µM    | 17     | No | ns |
| TNFa vs. Butyrate | 1000pg/mL vs. 5000µM    | 25.5   | No | ns |
| TNFa vs. Butyrate | 1000pg/mL vs. 7500µM    | 33.83  | No | ns |
| TNFa vs Combo     | 1000pg/mL vs. 50pg/mL   | 2.833  | No | ns |
| TNFa vs Combo     | 1000pg/mL vs. 100pg/mL  | -3.5   | No | ns |
| TNFa vs Combo     | 1000pg/mL vs. 150pg/mL  | 29.5   | No | ns |
| TNFa vs Combo     | 1000pg/mL vs. 200pg/mL  | 51.83  | No | ns |
| TNFa vs Combo     | 1000pg/mL vs. 250pg/mL  | 40.83  | No | ns |
| TNFa vs Combo     | 1000pg/mL vs. 500pg/mL  | 66.25  | No | ns |
| TNFa vs Combo     | 1000pg/mL vs. 1000pg/mL | 74.5   | No | ns |
| TNFa vs Combo     | 1000pg/mL vs. 2500pg/mL | 84.67  | No | ns |
| TNFa vs Combo     | 1000pg/mL vs. 5000pg/mL | 90     | No | ns |
| TNFa vs. TNFa     | 2500pg/mL vs. 5000pg/mL | 26.5   | No | ns |
| TNFa vs. Butyrate | 2500pg/mL vs. 50µM      | -113.5 | No | ns |
| TNFa vs. Butyrate | 2500pg/mL vs. 75µM      | -80.92 | No | ns |
| TNFa vs. Butyrate | 2500pg/mL vs. 100µM     | -91.33 | No | ns |
| TNFa vs. Butyrate | 2500pg/mL vs. 250µM     | -73.33 | No | ns |
| TNFa vs. Butyrate | 2500pg/mL vs. 500µM     | -59.83 | No | ns |
| TNFa vs. Butyrate | 2500pg/mL vs. 750µM     | -73.33 | No | ns |
| TNFa vs. Butyrate | 2500pg/mL vs. 1000µM    | -63    | No | ns |
| TNFa vs. Butyrate | 2500pg/mL vs. 2500µM    | -35.83 | No | ns |

|                       |                         |            |     |
|-----------------------|-------------------------|------------|-----|
| TNFa vs. Butyrate     | 2500pg/mL vs. 5000μM    | -27.33 No  | ns  |
| TNFa vs. Butyrate     | 2500pg/mL vs. 7500μM    | -19 No     | ns  |
| TNFa vs Combo         | 2500pg/mL vs. 50pg/mL   | -50 No     | ns  |
| TNFa vs Combo         | 2500pg/mL vs. 100pg/mL  | -56.33 No  | ns  |
| TNFa vs Combo         | 2500pg/mL vs. 150pg/mL  | -23.33 No  | ns  |
| TNFa vs Combo         | 2500pg/mL vs. 200pg/mL  | -1 No      | ns  |
| TNFa vs Combo         | 2500pg/mL vs. 250pg/mL  | -12 No     | ns  |
| TNFa vs Combo         | 2500pg/mL vs. 500pg/mL  | 13.42 No   | ns  |
| TNFa vs Combo         | 2500pg/mL vs. 1000pg/mL | 21.67 No   | ns  |
| TNFa vs Combo         | 2500pg/mL vs. 2500pg/mL | 31.83 No   | ns  |
| TNFa vs Combo         | 2500pg/mL vs. 5000pg/mL | 37.17 No   | ns  |
| TNFa vs. Butyrate     | 5000pg/mL vs. 50μM      | -140 Yes   | **  |
| TNFa vs. Butyrate     | 5000pg/mL vs. 75μM      | -107.4 No  | ns  |
| TNFa vs. Butyrate     | 5000pg/mL vs. 100μM     | -117.8 Yes | *   |
| TNFa vs. Butyrate     | 5000pg/mL vs. 250μM     | -99.83 No  | ns  |
| TNFa vs. Butyrate     | 5000pg/mL vs. 500μM     | -86.33 No  | ns  |
| TNFa vs. Butyrate     | 5000pg/mL vs. 750μM     | -99.83 No  | ns  |
| TNFa vs. Butyrate     | 5000pg/mL vs. 1000μM    | -89.5 No   | ns  |
| TNFa vs. Butyrate     | 5000pg/mL vs. 2500μM    | -62.33 No  | ns  |
| TNFa vs. Butyrate     | 5000pg/mL vs. 5000μM    | -53.83 No  | ns  |
| TNFa vs. Butyrate     | 5000pg/mL vs. 7500μM    | -45.5 No   | ns  |
| TNFa vs Combo         | 5000pg/mL vs. 50pg/mL   | -76.5 No   | ns  |
| TNFa vs Combo         | 5000pg/mL vs. 100pg/mL  | -82.83 No  | ns  |
| TNFa vs Combo         | 5000pg/mL vs. 150pg/mL  | -49.83 No  | ns  |
| TNFa vs Combo         | 5000pg/mL vs. 200pg/mL  | -27.5 No   | ns  |
| TNFa vs Combo         | 5000pg/mL vs. 250pg/mL  | -38.5 No   | ns  |
| TNFa vs Combo         | 5000pg/mL vs. 500pg/mL  | -13.08 No  | ns  |
| TNFa vs Combo         | 5000pg/mL vs. 1000pg/mL | -4.833 No  | ns  |
| TNFa vs Combo         | 5000pg/mL vs. 2500pg/mL | 5.333 No   | ns  |
| TNFa vs Combo         | 5000pg/mL vs. 5000pg/mL | 10.67 No   | ns  |
| Butyrate vs. Butyrate | 50μM vs. 75μM           | 32.58 No   | ns  |
| Butyrate vs. Butyrate | 50μM vs. 100μM          | 22.17 No   | ns  |
| Butyrate vs. Butyrate | 50μM vs. 250μM          | 40.17 No   | ns  |
| Butyrate vs. Butyrate | 50μM vs. 500μM          | 53.67 No   | ns  |
| Butyrate vs. Butyrate | 50μM vs. 750μM          | 40.17 No   | ns  |
| Butyrate vs. Butyrate | 50μM vs. 1000μM         | 50.5 No    | ns  |
| Butyrate vs. Butyrate | 50μM vs. 2500μM         | 77.67 No   | ns  |
| Butyrate vs. Butyrate | 50μM vs. 5000μM         | 86.17 No   | ns  |
| Butyrate vs. Butyrate | 50μM vs. 7500μM         | 94.5 No    | ns  |
| Butyrate vs. Combo    | 50μM vs. 50pg/mL        | 63.5 No    | ns  |
| Butyrate vs. Combo    | 50μM vs. 100pg/mL       | 57.17 No   | ns  |
| Butyrate vs. Combo    | 50μM vs. 150pg/mL       | 90.17 No   | ns  |
| Butyrate vs. Combo    | 50μM vs. 200pg/mL       | 112.5 No   | ns  |
| Butyrate vs. Combo    | 50μM vs. 250pg/mL       | 101.5 No   | ns  |
| Butyrate vs. Combo    | 50μM vs. 500pg/mL       | 126.9 Yes  | **  |
| Butyrate vs. Combo    | 50μM vs. 1000pg/mL      | 135.2 Yes  | **  |
| Butyrate vs. Combo    | 50μM vs. 2500pg/mL      | 145.3 Yes  | *** |

|                       |                     |        |     |     |
|-----------------------|---------------------|--------|-----|-----|
| Butyrate vs. Combo    | 50µM vs. 5000pg/mL  | 150.7  | Yes | *** |
| Butyrate vs. Butyrate | 75µM vs. 100µM      | -10.42 | No  | ns  |
| Butyrate vs. Butyrate | 75µM vs. 250µM      | 7.583  | No  | ns  |
| Butyrate vs. Butyrate | 75µM vs. 500µM      | 21.08  | No  | ns  |
| Butyrate vs. Butyrate | 75µM vs. 750µM      | 7.583  | No  | ns  |
| Butyrate vs. Butyrate | 75µM vs. 1000µM     | 17.92  | No  | ns  |
| Butyrate vs. Butyrate | 75µM vs. 2500µM     | 45.08  | No  | ns  |
| Butyrate vs. Butyrate | 75µM vs. 5000µM     | 53.58  | No  | ns  |
| Butyrate vs. Butyrate | 75µM vs. 7500µM     | 61.92  | No  | ns  |
| Butyrate vs. Combo    | 75µM vs. 50pg/mL    | 30.92  | No  | ns  |
| Butyrate vs. Combo    | 75µM vs. 100pg/mL   | 24.58  | No  | ns  |
| Butyrate vs. Combo    | 75µM vs. 150pg/mL   | 57.58  | No  | ns  |
| Butyrate vs. Combo    | 75µM vs. 200pg/mL   | 79.92  | No  | ns  |
| Butyrate vs. Combo    | 75µM vs. 250pg/mL   | 68.92  | No  | ns  |
| Butyrate vs. Combo    | 75µM vs. 500pg/mL   | 94.33  | No  | ns  |
| Butyrate vs. Combo    | 75µM vs. 1000pg/mL  | 102.6  | No  | ns  |
| Butyrate vs. Combo    | 75µM vs. 2500pg/mL  | 112.8  | No  | ns  |
| Butyrate vs. Combo    | 75µM vs. 5000pg/mL  | 118.1  | Yes | *   |
| Butyrate vs. Butyrate | 100µM vs. 250µM     | 18     | No  | ns  |
| Butyrate vs. Butyrate | 100µM vs. 500µM     | 31.5   | No  | ns  |
| Butyrate vs. Butyrate | 100µM vs. 750µM     | 18     | No  | ns  |
| Butyrate vs. Butyrate | 100µM vs. 1000µM    | 28.33  | No  | ns  |
| Butyrate vs. Butyrate | 100µM vs. 2500µM    | 55.5   | No  | ns  |
| Butyrate vs. Butyrate | 100µM vs. 5000µM    | 64     | No  | ns  |
| Butyrate vs. Butyrate | 100µM vs. 7500µM    | 72.33  | No  | ns  |
| Butyrate vs. Combo    | 100µM vs. 50pg/mL   | 41.33  | No  | ns  |
| Butyrate vs. Combo    | 100µM vs. 100pg/mL  | 35     | No  | ns  |
| Butyrate vs. Combo    | 100µM vs. 150pg/mL  | 68     | No  | ns  |
| Butyrate vs. Combo    | 100µM vs. 200pg/mL  | 90.33  | No  | ns  |
| Butyrate vs. Combo    | 100µM vs. 250pg/mL  | 79.33  | No  | ns  |
| Butyrate vs. Combo    | 100µM vs. 500pg/mL  | 104.8  | No  | ns  |
| Butyrate vs. Combo    | 100µM vs. 1000pg/mL | 113    | No  | ns  |
| Butyrate vs. Combo    | 100µM vs. 2500pg/mL | 123.2  | Yes | *   |
| Butyrate vs. Combo    | 100µM vs. 5000pg/mL | 128.5  | Yes | **  |
| Butyrate vs. Butyrate | 250µM vs. 500µM     | 13.5   | No  | ns  |
| Butyrate vs. Butyrate | 250µM vs. 750µM     | 0      | No  | ns  |
| Butyrate vs. Butyrate | 250µM vs. 1000µM    | 10.33  | No  | ns  |
| Butyrate vs. Butyrate | 250µM vs. 2500µM    | 37.5   | No  | ns  |
| Butyrate vs. Butyrate | 250µM vs. 5000µM    | 46     | No  | ns  |
| Butyrate vs. Butyrate | 250µM vs. 7500µM    | 54.33  | No  | ns  |
| Butyrate vs. Combo    | 250µM vs. 50pg/mL   | 23.33  | No  | ns  |
| Butyrate vs. Combo    | 250µM vs. 100pg/mL  | 17     | No  | ns  |
| Butyrate vs. Combo    | 250µM vs. 150pg/mL  | 50     | No  | ns  |
| Butyrate vs. Combo    | 250µM vs. 200pg/mL  | 72.33  | No  | ns  |
| Butyrate vs. Combo    | 250µM vs. 250pg/mL  | 61.33  | No  | ns  |
| Butyrate vs. Combo    | 250µM vs. 500pg/mL  | 86.75  | No  | ns  |
| Butyrate vs. Combo    | 250µM vs. 1000pg/mL | 95     | No  | ns  |

|                       |                      |           |    |
|-----------------------|----------------------|-----------|----|
| Butyrate vs. Combo    | 250µM vs. 2500pg/mL  | 105.2 No  | ns |
| Butyrate vs. Combo    | 250µM vs. 5000pg/mL  | 110.5 No  | ns |
| Butyrate vs. Butyrate | 500µM vs. 750µM      | -13.5 No  | ns |
| Butyrate vs. Butyrate | 500µM vs. 1000µM     | -3.167 No | ns |
| Butyrate vs. Butyrate | 500µM vs. 2500µM     | 24 No     | ns |
| Butyrate vs. Butyrate | 500µM vs. 5000µM     | 32.5 No   | ns |
| Butyrate vs. Butyrate | 500µM vs. 7500µM     | 40.83 No  | ns |
| Butyrate vs. Combo    | 500µM vs. 50pg/mL    | 9.833 No  | ns |
| Butyrate vs. Combo    | 500µM vs. 100pg/mL   | 3.5 No    | ns |
| Butyrate vs. Combo    | 500µM vs. 150pg/mL   | 36.5 No   | ns |
| Butyrate vs. Combo    | 500µM vs. 200pg/mL   | 58.83 No  | ns |
| Butyrate vs. Combo    | 500µM vs. 250pg/mL   | 47.83 No  | ns |
| Butyrate vs. Combo    | 500µM vs. 500pg/mL   | 73.25 No  | ns |
| Butyrate vs. Combo    | 500µM vs. 1000pg/mL  | 81.5 No   | ns |
| Butyrate vs. Combo    | 500µM vs. 2500pg/mL  | 91.67 No  | ns |
| Butyrate vs. Combo    | 500µM vs. 5000pg/mL  | 97 No     | ns |
| Butyrate vs. Butyrate | 750µM vs. 1000µM     | 10.33 No  | ns |
| Butyrate vs. Butyrate | 750µM vs. 2500µM     | 37.5 No   | ns |
| Butyrate vs. Butyrate | 750µM vs. 5000µM     | 46 No     | ns |
| Butyrate vs. Butyrate | 750µM vs. 7500µM     | 54.33 No  | ns |
| Butyrate vs. Combo    | 750µM vs. 50pg/mL    | 23.33 No  | ns |
| Butyrate vs. Combo    | 750µM vs. 100pg/mL   | 17 No     | ns |
| Butyrate vs. Combo    | 750µM vs. 150pg/mL   | 50 No     | ns |
| Butyrate vs. Combo    | 750µM vs. 200pg/mL   | 72.33 No  | ns |
| Butyrate vs. Combo    | 750µM vs. 250pg/mL   | 61.33 No  | ns |
| Butyrate vs. Combo    | 750µM vs. 500pg/mL   | 86.75 No  | ns |
| Butyrate vs. Combo    | 750µM vs. 1000pg/mL  | 95 No     | ns |
| Butyrate vs. Combo    | 750µM vs. 2500pg/mL  | 105.2 No  | ns |
| Butyrate vs. Combo    | 750µM vs. 5000pg/mL  | 110.5 No  | ns |
| Butyrate vs. Butyrate | 1000µM vs. 2500µM    | 27.17 No  | ns |
| Butyrate vs. Butyrate | 1000µM vs. 5000µM    | 35.67 No  | ns |
| Butyrate vs. Butyrate | 1000µM vs. 7500µM    | 44 No     | ns |
| Butyrate vs. Combo    | 1000µM vs. 50pg/mL   | 13 No     | ns |
| Butyrate vs. Combo    | 1000µM vs. 100pg/mL  | 6.667 No  | ns |
| Butyrate vs. Combo    | 1000µM vs. 150pg/mL  | 39.67 No  | ns |
| Butyrate vs. Combo    | 1000µM vs. 200pg/mL  | 62 No     | ns |
| Butyrate vs. Combo    | 1000µM vs. 250pg/mL  | 51 No     | ns |
| Butyrate vs. Combo    | 1000µM vs. 500pg/mL  | 76.42 No  | ns |
| Butyrate vs. Combo    | 1000µM vs. 1000pg/mL | 84.67 No  | ns |
| Butyrate vs. Combo    | 1000µM vs. 2500pg/mL | 94.83 No  | ns |
| Butyrate vs. Combo    | 1000µM vs. 5000pg/mL | 100.2 No  | ns |
| Butyrate vs. Butyrate | 2500µM vs. 5000µM    | 8.5 No    | ns |
| Butyrate vs. Butyrate | 2500µM vs. 7500µM    | 16.83 No  | ns |
| Butyrate vs. Combo    | 2500µM vs. 50pg/mL   | -14.17 No | ns |
| Butyrate vs. Combo    | 2500µM vs. 100pg/mL  | -20.5 No  | ns |
| Butyrate vs. Combo    | 2500µM vs. 150pg/mL  | 12.5 No   | ns |
| Butyrate vs. Combo    | 2500µM vs. 200pg/mL  | 34.83 No  | ns |

|                       |                        |        |    |    |
|-----------------------|------------------------|--------|----|----|
| Butyrate vs. Combo    | 2500μM vs. 250pg/mL    | 23.83  | No | ns |
| Butyrate vs. Combo    | 2500μM vs. 500pg/mL    | 49.25  | No | ns |
| Butyrate vs. Combo    | 2500μM vs. 1000pg/mL   | 57.5   | No | ns |
| Butyrate vs. Combo    | 2500μM vs. 2500pg/mL   | 67.67  | No | ns |
| Butyrate vs. Combo    | 2500μM vs. 5000pg/mL   | 73     | No | ns |
| Butyrate vs. Butyrate | 5000μM vs. 7500μM      | 8.333  | No | ns |
| Butyrate vs. Combo    | 5000μM vs. 50pg/mL     | -22.67 | No | ns |
| Butyrate vs. Combo    | 5000μM vs. 100pg/mL    | -29    | No | ns |
| Butyrate vs. Combo    | 5000μM vs. 150pg/mL    | 4      | No | ns |
| Butyrate vs. Combo    | 5000μM vs. 200pg/mL    | 26.33  | No | ns |
| Butyrate vs. Combo    | 5000μM vs. 250pg/mL    | 15.33  | No | ns |
| Butyrate vs. Combo    | 5000μM vs. 500pg/mL    | 40.75  | No | ns |
| Butyrate vs. Combo    | 5000μM vs. 1000pg/mL   | 49     | No | ns |
| Butyrate vs. Combo    | 5000μM vs. 2500pg/mL   | 59.17  | No | ns |
| Butyrate vs. Combo    | 5000μM vs. 5000pg/mL   | 64.5   | No | ns |
| Butyrate vs. Combo    | 7500μM vs. 50pg/mL     | -31    | No | ns |
| Butyrate vs. Combo    | 7500μM vs. 100pg/mL    | -37.33 | No | ns |
| Butyrate vs. Combo    | 7500μM vs. 150pg/mL    | -4.333 | No | ns |
| Butyrate vs. Combo    | 7500μM vs. 200pg/mL    | 18     | No | ns |
| Butyrate vs. Combo    | 7500μM vs. 250pg/mL    | 7      | No | ns |
| Butyrate vs. Combo    | 7500μM vs. 500pg/mL    | 32.42  | No | ns |
| Butyrate vs. Combo    | 7500μM vs. 1000pg/mL   | 40.67  | No | ns |
| Butyrate vs. Combo    | 7500μM vs. 2500pg/mL   | 50.83  | No | ns |
| Butyrate vs. Combo    | 7500μM vs. 5000pg/mL   | 56.17  | No | ns |
| Combo vs. Combo       | 50pg/mL vs. 100pg/mL   | -6.333 | No | ns |
| Combo vs. Combo       | 50pg/mL vs. 150pg/mL   | 26.67  | No | ns |
| Combo vs. Combo       | 50pg/mL vs. 200pg/mL   | 49     | No | ns |
| Combo vs. Combo       | 50pg/mL vs. 250pg/mL   | 38     | No | ns |
| Combo vs. Combo       | 50pg/mL vs. 500pg/mL   | 63.42  | No | ns |
| Combo vs. Combo       | 50pg/mL vs. 1000pg/mL  | 71.67  | No | ns |
| Combo vs. Combo       | 50pg/mL vs. 2500pg/mL  | 81.83  | No | ns |
| Combo vs. Combo       | 50pg/mL vs. 5000pg/mL  | 87.17  | No | ns |
| Combo vs. Combo       | 100pg/mL vs. 150pg/mL  | 33     | No | ns |
| Combo vs. Combo       | 100pg/mL vs. 200pg/mL  | 55.33  | No | ns |
| Combo vs. Combo       | 100pg/mL vs. 250pg/mL  | 44.33  | No | ns |
| Combo vs. Combo       | 100pg/mL vs. 500pg/mL  | 69.75  | No | ns |
| Combo vs. Combo       | 100pg/mL vs. 1000pg/mL | 78     | No | ns |
| Combo vs. Combo       | 100pg/mL vs. 2500pg/mL | 88.17  | No | ns |
| Combo vs. Combo       | 100pg/mL vs. 5000pg/mL | 93.5   | No | ns |
| Combo vs. Combo       | 150pg/mL vs. 200pg/mL  | 22.33  | No | ns |
| Combo vs. Combo       | 150pg/mL vs. 250pg/mL  | 11.33  | No | ns |
| Combo vs. Combo       | 150pg/mL vs. 500pg/mL  | 36.75  | No | ns |
| Combo vs. Combo       | 150pg/mL vs. 1000pg/mL | 45     | No | ns |
| Combo vs. Combo       | 150pg/mL vs. 2500pg/mL | 55.17  | No | ns |
| Combo vs. Combo       | 150pg/mL vs. 5000pg/mL | 60.5   | No | ns |
| Combo vs. Combo       | 200pg/mL vs. 250pg/mL  | -11    | No | ns |
| Combo vs. Combo       | 200pg/mL vs. 500pg/mL  | 14.42  | No | ns |

|                 |                         |       |    |    |
|-----------------|-------------------------|-------|----|----|
| Combo vs. Combo | 200pg/mL vs. 1000pg/mL  | 22.67 | No | ns |
| Combo vs. Combo | 200pg/mL vs. 2500pg/mL  | 32.83 | No | ns |
| Combo vs. Combo | 200pg/mL vs. 5000pg/mL  | 38.17 | No | ns |
| Combo vs. Combo | 250pg/mL vs. 500pg/mL   | 25.42 | No | ns |
| Combo vs. Combo | 250pg/mL vs. 1000pg/mL  | 33.67 | No | ns |
| Combo vs. Combo | 250pg/mL vs. 2500pg/mL  | 43.83 | No | ns |
| Combo vs. Combo | 250pg/mL vs. 5000pg/mL  | 49.17 | No | ns |
| Combo vs. Combo | 500pg/mL vs. 1000pg/mL  | 8.25  | No | ns |
| Combo vs. Combo | 500pg/mL vs. 2500pg/mL  | 18.42 | No | ns |
| Combo vs. Combo | 500pg/mL vs. 5000pg/mL  | 23.75 | No | ns |
| Combo vs. Combo | 1000pg/mL vs. 2500pg/mL | 10.17 | No | ns |
| Combo vs. Combo | 1000pg/mL vs. 5000pg/mL | 15.5  | No | ns |

A-B  
A-C  
A-D  
A-E  
A-F  
A-G  
A-H  
A-I  
A-J  
A-K  
A-L  
A-M  
A-N  
A-O  
A-P  
A-Q  
A-R  
A-S  
A-T  
A-U  
A-V  
A-W  
A-X  
A-Y  
A-Z  
A-AA  
A-AB  
A-AC  
A-AD  
B-C  
B-D  
B-E  
B-F  
B-G  
B-H  
B-I  
B-J  
B-K  
B-L  
B-M  
B-N  
B-O  
B-P  
B-Q  
B-R  
B-S

B-T  
B-U  
B-V  
B-W  
B-X  
B-Y  
B-Z  
B-AA  
B-AB  
B-AC  
B-AD  
C-D  
C-E  
C-F  
C-G  
C-H  
C-I  
C-J  
C-K  
C-L  
C-M  
C-N  
C-O  
C-P  
C-Q  
C-R  
C-S  
C-T  
C-U  
C-V  
C-W  
C-X  
C-Y  
C-Z  
C-AA  
C-AB  
C-AC  
C-AD  
D-E  
D-F  
D-G  
D-H  
D-I  
D-J  
D-K  
D-L  
D-M

D-N  
D-O  
D-P  
D-Q  
D-R  
D-S  
D-T  
D-U

D-V  
D-W  
D-X  
D-Y  
D-Z  
D-AA  
D-AB  
D-AC  
D-AD

E-F  
E-G  
E-H  
E-I  
E-J  
E-K  
E-L  
E-M  
E-N  
E-O  
E-P  
E-Q  
E-R  
E-S  
E-T  
E-U

E-V  
E-W  
E-X  
E-Y  
E-Z  
E-AA  
E-AB  
E-AC  
E-AD

F-G  
F-H  
F-I  
F-J  
F-K

F-L

F-M

F-N

F-O

F-P

F-Q

F-R

F-S

F-T

F-U

F-V

F-W

F-X

F-Y

F-Z

F-AA

F-AB

F-AC

F-AD

G-H

G-I

G-J

G-K

G-L

G-M

G-N

G-O

G-P

G-Q

G-R

G-S

G-T

G-U

G-V

G-W

G-X

G-Y

G-Z

G-AA

G-AB

G-AC

G-AD

H-I

H-J

H-K

H-L

H-M

H-N  
H-O  
H-P  
H-Q  
H-R  
H-S  
H-T  
H-U

H-V  
H-W  
H-X  
H-Y  
H-Z  
H-AA  
H-AB  
H-AC  
H-AD

I-J  
I-K  
I-L  
I-M  
I-N  
I-O  
I-P  
I-Q  
I-R  
I-S  
I-T  
I-U

I-V  
I-W  
I-X  
I-Y  
I-Z  
I-AA  
I-AB  
I-AC  
I-AD

J-K  
J-L  
J-M  
J-N  
J-O  
J-P  
J-Q  
J-R  
J-S

J-T

J-U

J-V

J-W

J-X

J-Y

J-Z

J-AA

J-AB

J-AC

J-AD

K-L

K-M

K-N

K-O

K-P

K-Q

K-R

K-S

K-T

K-U

K-V

K-W

K-X

K-Y

K-Z

K-AA

K-AB

K-AC

K-AD

L-M

L-N

L-O

L-P

L-Q

L-R

L-S

L-T

L-U

L-V

L-W

L-X

L-Y

L-Z

L-AA

L-AB

L-AC

L-AD  
M-N  
M-O  
M-P  
M-Q  
M-R  
M-S  
M-T  
M-U  
M-V  
M-W  
M-X  
M-Y  
M-Z  
M-AA  
M-AB  
M-AC  
M-AD  
N-O  
N-P  
N-Q  
N-R  
N-S  
N-T  
N-U  
N-V  
N-W  
N-X  
N-Y  
N-Z  
N-AA  
N-AB  
N-AC  
N-AD  
O-P  
O-Q  
O-R  
O-S  
O-T  
O-U  
O-V  
O-W  
O-X  
O-Y  
O-Z  
O-AA  
O-AB

O-AC  
O-AD  
P-Q  
P-R  
P-S  
P-T  
P-U  
P-V  
P-W  
P-X  
P-Y  
P-Z  
P-AA  
P-AB  
P-AC  
P-AD  
Q-R  
Q-S  
Q-T  
Q-U  
Q-V  
Q-W  
Q-X  
Q-Y  
Q-Z  
Q-AA  
Q-AB  
Q-AC  
Q-AD  
R-S  
R-T  
R-U  
R-V  
R-W  
R-X  
R-Y  
R-Z  
R-AA  
R-AB  
R-AC  
R-AD  
S-T  
S-U  
S-V  
S-W  
S-X  
S-Y

S-Z  
S-AA  
S-AB  
S-AC  
S-AD  
T-U  
T-V  
T-W  
T-X  
T-Y  
T-Z  
T-AA  
T-AB  
T-AC  
T-AD  
U-V  
U-W  
U-X  
U-Y  
U-Z  
U-AA  
U-AB  
U-AC  
U-AD  
V-W  
V-X  
V-Y  
V-Z  
V-AA  
V-AB  
V-AC  
V-AD  
W-X  
W-Y  
W-Z  
W-AA  
W-AB  
W-AC  
W-AD  
X-Y  
X-Z  
X-AA  
X-AB  
X-AC  
X-AD  
Y-Z  
Y-AA

Y-AB  
Y-AC  
Y-AD  
Z-AA  
Z-AB  
Z-AC  
Z-AD  
AA-AB  
AA-AC  
AA-AD  
AB-AC  
AB-AD
